# Supplementary material for: Catalytic aminomethylative etherification of N-allenamides with N,O-acetals enabled by Lewis/Brønsted acid catalysis
Source: Royal Society of Chemistry journal article supplement (doi:10.1039/d3ob00363a), 2023-01-01
Supplement: d3ob00363a1.pdf [file d3ob00363a1.pdf]

## Supporting Information

# Catalytic Aminomethylative Etherification of N-Allenamides with N,O-Acetals Enabled by Lewis/Brønsted Acid Catalysis

Tao Zhang, Danqing Ji and Jiangtao Sun\*

*Jiangsu Key Laboratory of Advanced Catalytic Materials & Technology,*

*School of Petrochemical Engineering, Changzhou University,*

*1 Gehu Road, 213164 Changzhou, China*

E-mail: [jtsun@cczu.edu.cn](mailto:jtsun@cczu.edu.cn)

# Table of Contents

1. General information
2. General procedure for Scheme 2
3. General procedure for Scheme 3
4. General procedure for Scheme 5
5. X-ray crystallographic data of **3a** and **3b'**
6. References
7. NMR and HPLC Spectra of compounds

## General information

All of the reactions were carried out in flame-dried tubes under argon atmosphere. Solvents were dried prior to use. Commercially obtained reagents were used as received. Analytical thin layer chromatography (TLC) was carried out using pre-coated (0.20 mm thickness) silica gel plates with F<sub>254</sub> indicator. For column chromatography, 200-300 mesh silica gel was used. <sup>1</sup>H NMR were recorded on Bruker 300 MHz, 400 MHz spectrometer in CDCl<sub>3</sub>. <sup>13</sup>C NMR were recorded on Bruker 75 MHz or 100 MHz spectrometer in CDCl<sub>3</sub>. <sup>19</sup>F NMR were recorded on Bruker 282 MHz or 377 MHz spectrometer in CDCl<sub>3</sub>. Data for <sup>1</sup>H NMR spectra were reported relative to tetramethylsilane (TMS) as an internal standard (0 ppm), and were reported as follows: chemical shift (δ ppm), multiplicity, coupling constant (Hz) and integration. Multiplicities are denoted as follows: s = singlet, d = doublet, t = triplet, q = quartet, dd = doublet of doublets and m = multiplet. Data for <sup>13</sup>C NMR spectra were reported relative to CDCl<sub>3</sub> as an internal standard (77.16 ppm), and were reported in terms of chemical shift (δ ppm). High resolution mass spectra (HRMS) were performed on Agilent 6540 QTOF or Agilent 6230A TOF mass spectrometer (ESI). Melting points were determined on a SGW X-4B melting point apparatus without correction. Enantiomeric ratio (er) values were determined by chiral HPLC analysis on Daicel ChiralpakID and IE columns. The allenamide substrates<sup>1</sup>, alkoxyallenes<sup>2</sup> and N,O-acetals<sup>3</sup> were prepared according to reported methods.

## General procedure for Scheme 2

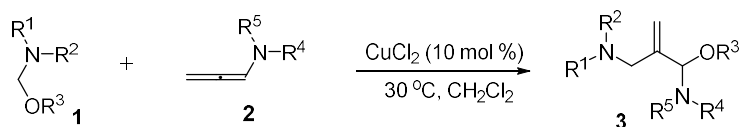

To a dry tube was added  $\text{CuCl}_2$  (2.7 mg, 0.02 mmol, 0.1 equiv), **1** (0.2 mmol, 1.0 equiv), **2** (0.3 mmol, 1.5 equiv), and anhydrous DCM (4 mL) under argon atmosphere. Then, the mixture was stirred at  $30\text{ }^\circ\text{C}$  in a heating block for 12 h. The reaction mixture was concentrated under vacuum; the crude residue was purified by silica gel column chromatography to give products **3**.

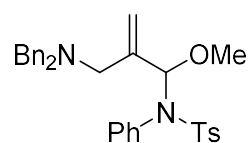

### *N*-(2-((dibenzylamino)methyl)-1-methoxyallyl)-4-methyl-*N*-phenylbenzenesulfonamide (**3a**):

Prepared via **general procedure 2** from *N,N*-dibenzyl-1-methoxymethanamine (48.2 mg, 0.2 mmol, 1.0 equiv) and 4-methyl-*N*-phenyl-*N*-(propa-1,2-dien-1-yl)benzenesulfonamide (85.6 mg, 0.3 mmol, 1.5 equiv) according to the general procedure in the presence of  $\text{CuCl}_2$  (2.7 mg, 0.02 mmol, 10 mol %), purified by silica gel column chromatography (petroleum ether/ EtOAc = 25:1 to 10:1) and obtained as a white solid (82.2 mg, 78%), mp:  $106\text{--}107\text{ }^\circ\text{C}$ .

Gram-Scale reaction: *N,N*-dibenzyl-1-methoxymethanamine (0.83 g, 3.45 mmol, 1.0 equiv) and 4-methyl-*N*-phenyl-*N*-(propa-1,2-dien-1-yl)benzenesulfonamide (1.47 g, 5.18 mmol, 1.5 equiv),  $\text{CuCl}_2$  (46 mg, 0.35 mmol, 10 mol %) in DCM (70 mL), purified by silica gel column chromatography (petroleum ether/ EtOAc = 25:1 to 10:1) and obtained as a white solid (1.36 g, 75%).

$R_f$  (Petroleum ether/ EtOAc = 10:1) = 0.5.

$^1\text{H NMR}$  (400 MHz,  $\text{CDCl}_3$ )  $\delta$  7.46-7.43 (m, 4H), 7.40-7.35 (m, 6H), 7.29-7.25 (m, 2H), 7.17-7.13 (m, 3H), 7.04 (t,  $J = 7.7\text{ Hz}$ , 2H), 6.73 (d,  $J = 7.5\text{ Hz}$ , 2H), 6.10 (s, 1H), 5.15 (s, 1H), 4.99 (s, 1H), 3.74 (d,  $J = 13.7\text{ Hz}$ , 2H), 3.39 (s, 3H), 3.25 (d,  $J = 13.7\text{ Hz}$ , 2H), 3.08 (d,  $J = 14.4\text{ Hz}$ , 1H), 2.66 (d,  $J = 14.4\text{ Hz}$ , 1H), 2.38 (s, 3H).

$^{13}\text{C NMR}$  (75 MHz,  $\text{CDCl}_3$ )  $\delta$  143.1, 140.6, 139.3, 137.0, 135.6, 131.3, 128.8, 128.7, 128.5, 128.2, 127.99, 127.96, 126.9, 117.2, 89.4, 58.4, 56.7, 56.3, 21.6.

**HRMS (ESI) m/z:** [M+H]<sup>+</sup> calcd for C<sub>32</sub>H<sub>35</sub>N<sub>2</sub>O<sub>3</sub>S 527.2363, found 527.2363.

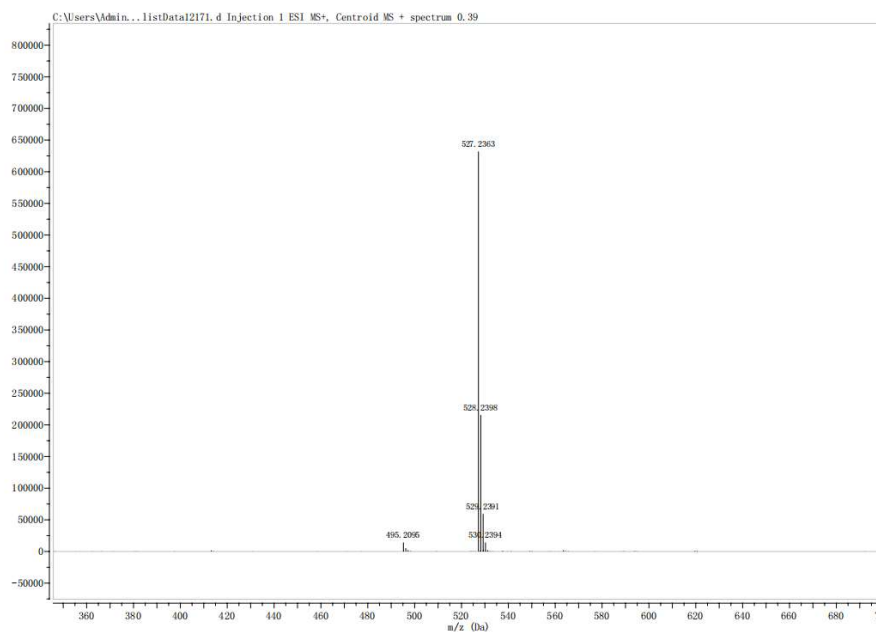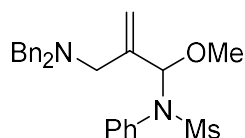

***N*-2-((dibenzylamino)methyl)-1-methoxyallyl)-*N*-phenylmethanesulfonamide (3b):**

Prepared via **general procedure 2** from *N,N*-dibenzyl-1-methoxymethanamine (48.2 mg, 0.2 mmol, 1.0 equiv) and *N*-phenyl-*N*-(propa-1,2-dien-1-yl)methanesulfonamide (62.7 mg, 0.3 mmol, 1.5 equiv) according to the general procedure in the presence of CuCl<sub>2</sub> (2.7 mg, 0.02 mmol, 10 mol %), purified by silica gel column chromatography (petroleum ether/ EtOAc = 20:1 to 10:1) and obtained as a white solid (68 mg, 75%), mp: 79-80 °C.

**R<sub>f</sub>** (Petroleum ether/ EtOAc = 10:1) = 0.3.

**<sup>1</sup>H NMR** (400 MHz, CDCl<sub>3</sub>) δ 7.46-7.41 (m, 4H), 7.36 (t, *J* = 7.5 Hz, 4H), 7.27-7.23 (m, 2H), 7.19-7.12 (m, 3H), 6.99 (d, *J* = 7.5 Hz, 2H), 6.03 (s, 1H), 5.18 (s, 1H), 5.16 (s, 1H), 3.80 (d, *J* = 13.7 Hz, 2H), 3.44 (s, 3H), 3.12 (d, *J* = 13.7 Hz, 2H), 3.07 (d, *J* = 14.0 Hz, 1H), 2.89 (s, 3H), 2.56 (d, *J* = 14.0 Hz, 1H).

**<sup>13</sup>C NMR** (100 MHz, CDCl<sub>3</sub>) δ 140.1, 139.2, 136.1, 130.6, 128.8, 128.6, 128.5, 128.2, 127.0, 118.0, 89.5, 58.5, 57.1, 56.5, 39.6.

**HRMS (ESI) m/z:** [M+H]<sup>+</sup> calcd for C<sub>26</sub>H<sub>31</sub>N<sub>2</sub>O<sub>3</sub>S 451.2050, found 451.2052.

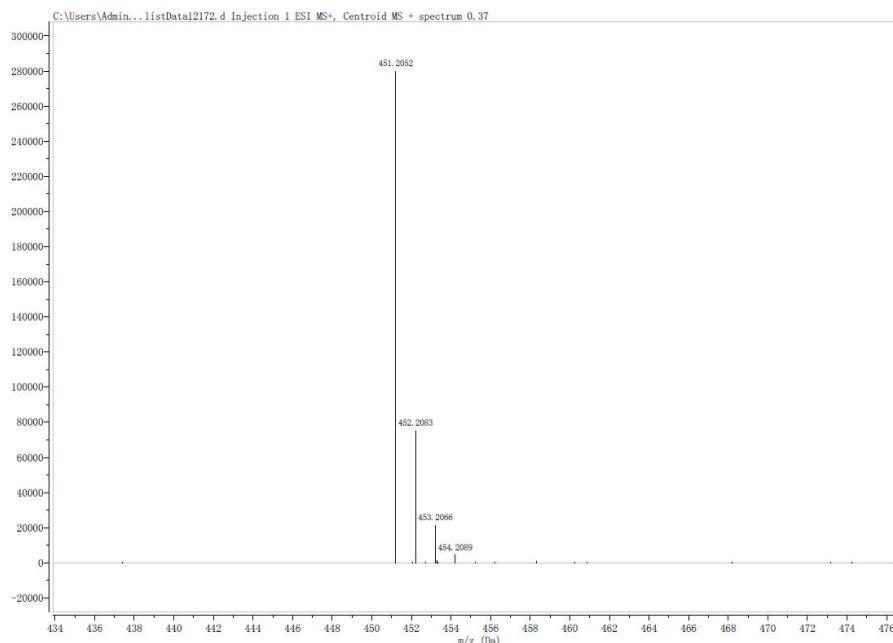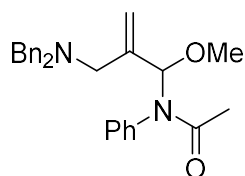

***N*-(2-((dibenzylamino)methyl)-1-methoxyallyl)-*N*-phenylacetamide (3c):**

Prepared via **general procedure 2** from *N,N*-dibenzyl-1-methoxymethanamine (48.2 mg, 0.2 mmol, 1.0 equiv) and *N*-phenyl-*N*-(propa-1,2-dien-1-yl)acetamide (51.9 mg, 0.3 mmol, 1.5 equiv) according to the general procedure in the presence of  $\text{CuCl}_2$  (2.7 mg, 0.02 mmol, 10 mol %), purified by silica gel column chromatography (petroleum ether/ EtOAc = 20:1 to 8:1) and obtained as a white solid (52.2 mg, 63%), mp: 89-90 °C.

$R_f$  (Petroleum ether/ EtOAc = 10:1) = 0.25.

$^1\text{H NMR}$  (400 MHz,  $\text{CDCl}_3$ )  $\delta$  7.47-7.40 (m, 5H), 7.35 (t,  $J = 7.5$  Hz, 5H), 7.25-7.23 (m, 2H), 7.19-7.14 (m, 3H), 6.59 (s, 1H), 5.11 (s, 1H), 5.09 (s, 1H), 3.80 (d,  $J = 13.5$  Hz, 2H), 3.50 (s, 3H), 3.13 (d,  $J = 13.5$  Hz, 2H), 3.03 (d,  $J = 14.2$  Hz, 1H), 2.60 (d,  $J = 14.2$  Hz, 1H), 1.77 (s, 3H).

$^{13}\text{C NMR}$  (100 MHz,  $\text{CDCl}_3$ )  $\delta$  171.8, 142.1, 139.7, 139.1, 129.01, 128.96, 128.5, 128.3, 127.6, 126.9, 117.0, 83.1, 58.6, 56.7, 56.6, 23.8.

**HRMS (ESI)**  $m/z$ :  $[\text{M}+\text{H}]^+$  calcd for  $\text{C}_{27}\text{H}_{31}\text{N}_2\text{O}_2$  415.2380, found 415.2386.

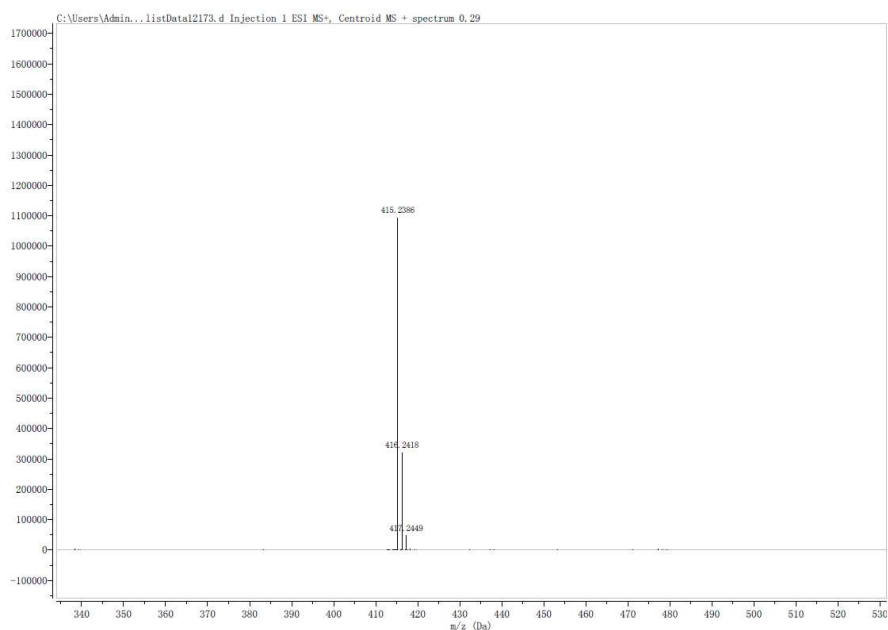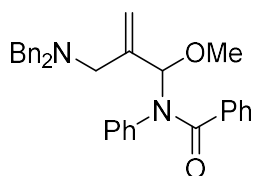

***N*-(2-((dibenzylamino)methyl)-1-methoxyallyl)-*N*-phenylbenzamide (3d):**

Prepared via **general procedure 2** from *N,N*-dibenzyl-1-methoxymethanamine (48.2 mg, 0.2 mmol, 1.0 equiv) and *N*-phenyl-*N*-(propa-1,2-dien-1-yl)benzamide (70.5 mg, 0.3 mmol, 1.5 equiv) according to the general procedure in the presence of  $\text{CuCl}_2$  (2.7 mg, 0.02 mmol, 10 mol %), purified by silica gel column chromatography (petroleum ether/ EtOAc = 20:1 to 10:1) and obtained as colorless oil (50.5 mg, 53%).

$R_f$  (Petroleum ether/ EtOAc = 10:1) = 0.35.

$^1\text{H NMR}$  (400 MHz,  $\text{CDCl}_3$ )  $\delta$  7.44-7.40 (m, 4H), 7.31 (t,  $J = 7.5$  Hz, 4H), 7.24-7.19 (m, 5H), 7.15-7.11 (m, 2H), 7.02-6.95 (m, 3H), 6.85-6.45 (m, 3H), 5.31 (s, 2H), 3.72 (d,  $J = 13.6$  Hz, 2H), 3.57 (s, 3H), 3.20 (d,  $J = 13.6$  Hz, 2H), 3.05 (d,  $J = 14.5$  Hz, 1H), 2.69 (d,  $J = 14.5$  Hz, 1H).

$^{13}\text{C NMR}$  (75 MHz,  $\text{CDCl}_3$ )  $\delta$  171.6, 142.0, 139.6, 139.4, 136.0, 129.7, 128.9, 128.8, 128.3, 128.1, 127.6, 126.9, 126.6, 117.0, 84.7, 58.6, 56.5, 56.4.

**HRMS (ESI)**  $m/z$ :  $[\text{M}+\text{H}]^+$  calcd for  $\text{C}_{32}\text{H}_{33}\text{N}_2\text{O}_2$  477.2537, found 477.2541.

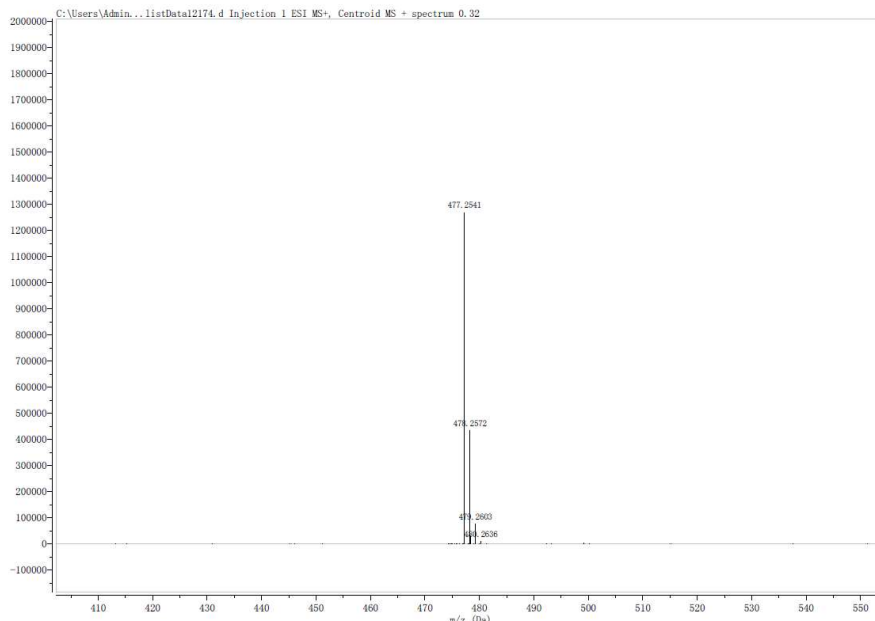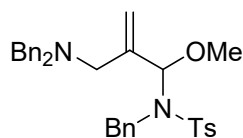

***N*-benzyl-*N*-(2-((dibenzylamino)methyl)-1-methoxyallyl)-4-methylbenzenesulfonamide (3e):**

Prepared via **general procedure 2** from *N,N*-dibenzyl-1-methoxymethanamine (48.2 mg, 0.2 mmol, 1.0 equiv) and *N*-benzyl-4-methyl-*N*-(propa-1,2-dien-1-yl)benzenesulfonamide (89.8 mg, 0.3 mmol, 1.5 equiv) according to the general procedure in the presence of CuCl<sub>2</sub> (2.7 mg, 0.02 mmol, 10 mol %), purified by silica gel column chromatography (petroleum ether/ EtOAc = 25:1 to 10:1) and obtained as yellow oil (60.6 mg, 56%).

**R<sub>f</sub>** (Petroleum ether/ EtOAc = 10:1) = 0.4.

**<sup>1</sup>H NMR** (400 MHz, CDCl<sub>3</sub>) δ 7.62 (d, *J* = 8.3 Hz, 2H), 7.38-7.33 (m, 8H), 7.27-7.24 (m, 2H), 7.20 (d, *J* = 8.1 Hz, 2H), 7.11-7.05 (m, 5H), 5.71 (s, 1H), 5.33 (s, 2H), 4.17 (d, *J* = 16.0 Hz, 1H), 4.11 (d, *J* = 16.0 Hz, 1H), 3.56 (d, *J* = 13.8 Hz, 2H), 3.25 (d, *J* = 13.8 Hz, 2H), 3.16 (s, 3H), 2.80 (d, *J* = 14.6 Hz, 1H), 2.51 (d, *J* = 14.6 Hz, 1H), 2.40 (s, 3H).

**<sup>13</sup>C NMR** (75 MHz, CDCl<sub>3</sub>) δ 143.3, 141.7, 139.2, 137.5, 137.3, 129.3, 128.7, 128.6, 128.4, 127.89, 127.85, 126.9, 126.8, 116.9, 88.3, 58.0, 56.19, 56.16, 46.5, 21.6.

**HRMS (ESI)** *m/z*: [M+H]<sup>+</sup> calcd for C<sub>33</sub>H<sub>37</sub>N<sub>2</sub>O<sub>3</sub>S 541.2519, found 541.2522.



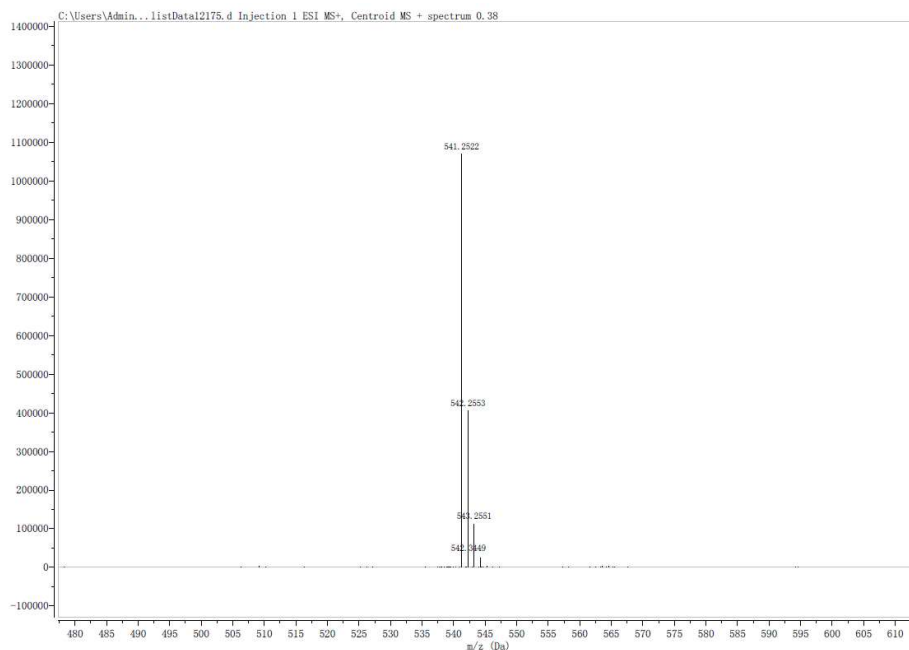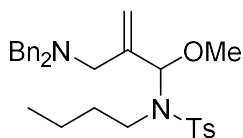

***N*-butyl-*N*-(2-((dibenzylamino)methyl)-1-methoxyallyl)-4-methylbenzenesulfonamide (3f):**

Prepared via **general procedure 2** from *N,N*-dibenzyl-1-methoxymethanamine (48.2 mg, 0.2 mmol, 1.0 equiv) and *N*-butyl-4-methyl-*N*-(propa-1,2-dien-1-yl)benzenesulfonamide (79.6 mg, 0.3 mmol, 1.5 equiv) according to the general procedure in the presence of  $\text{CuCl}_2$  (2.7 mg, 0.02 mmol, 10 mol %), purified by silica gel column chromatography (petroleum ether/ EtOAc = 30:1 to 15:1) and obtained as colorless oil (85.1 mg, 84%).

$R_f$  (Petroleum ether/ EtOAc = 10:1) = 0.5.

$^1\text{H NMR}$  (400 MHz,  $\text{CDCl}_3$ )  $\delta$  7.67 (d,  $J$  = 8.0 Hz, 2H), 7.36 (d,  $J$  = 7.3 Hz, 4H), 7.30 (t,  $J$  = 7.4 Hz, 4H), 7.23-7.21 (m, 4H), 5.54 (s, 1H), 5.49 (s, 1H), 5.29 (s, 1H), 3.56-3.46 (m, 4H), 3.24 (s, 3H), 3.02-2.94 (m, 1H), 2.90-2.86 (m, 2H), 2.82-2.72 (m, 1H), 2.39 (s, 3H), 1.43-1.26 (m, 2H), 1.09-1.02 (m, 2H), 0.76 (t,  $J$  = 7.3 Hz, 3H).

$^{13}\text{C NMR}$  (100 MHz,  $\text{CDCl}_3$ )  $\delta$  143.2, 142.0, 139.2, 137.8, 129.4, 128.7, 128.3, 127.6, 127.0, 115.4, 88.4, 58.1, 56.2, 56.1, 43.2, 32.1, 21.6, 20.3, 13.6.

**HRMS (ESI)**  $m/z$ :  $[\text{M}+\text{H}]^+$  calcd for  $\text{C}_{30}\text{H}_{39}\text{N}_2\text{O}_3\text{S}$  507.2676, found 507.2677.

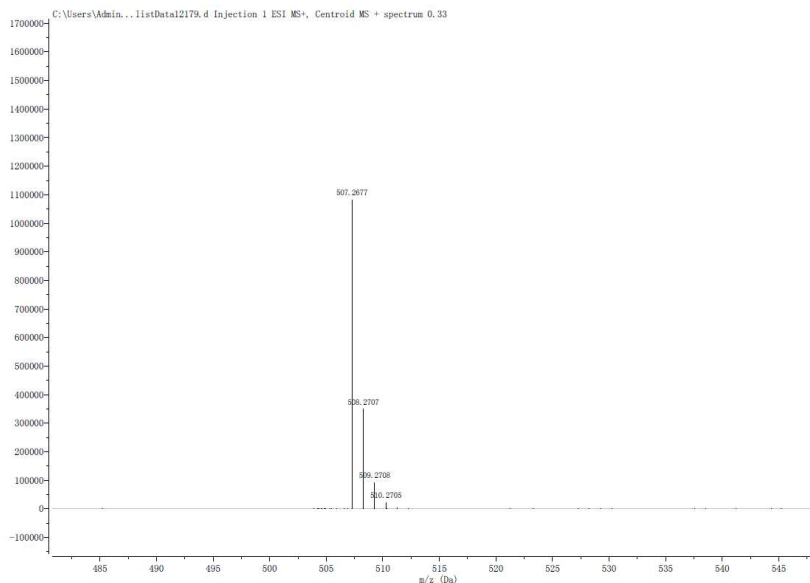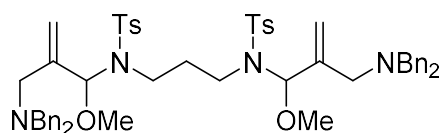

***N,N'*-(propane-1,3-diyl)bis(*N*-(2-((dibenzylamino)methyl)-1-methoxyallyl)-4-methylbenzenesulfonamide) (3g):**

**P** Prepared via **general procedure 2** from *N,N*-dibenzyl-1-methoxymethanamine (72.3 mg, 0.3 mmol, 1.5 equiv) and *N,N'*-(propane-1,3-diyl)bis(4-methyl-*N*-(propa-1,2-dien-1-yl)benzenesulfonamide) (91.6 mg, 0.2 mmol, 1.0 equiv) according to the general procedure in the presence of  $\text{CuCl}_2$  (2.7 mg, 0.02 mmol, 10 mol %), purified by silica gel column chromatography (petroleum ether/ EtOAc = 20:1 to 7:1) and obtained as colorless oil (114.8 mg, 61%).

**R<sub>f</sub>** (Petroleum ether/ EtOAc = 5:1) = 0.5.

**<sup>1</sup>H NMR** (400 MHz,  $\text{CDCl}_3$ )  $\delta$  7.63-7.60 (m, 4H), 7.34-7.28 (m, 14H), 7.25-7.13 (m, 10H), 5.50 (s, 2H), 5.38 (s, 2H), 5.18 (s, 2H), 3.52-3.43 (m, 8H), 3.15 (s, 3H), 3.14 (s, 3H), 2.91-2.82 (m, 4H), 2.75-2.70 (m, 2H), 2.67-2.58 (m, 2H), 2.39 (s, 6H), 1.58-1.54 (m, 2H).

**<sup>13</sup>C NMR** (75 MHz,  $\text{CDCl}_3$ )  $\delta$  143.2, 141.7, 139.0, 137.61, 137.57, 129.4, 128.7, 128.3, 127.6, 126.9, 116.12, 116.05, 88.1, 57.8, 56.06, 56.05, 41.1, 30.3, 21.6.

**HRMS (ESI)** *m/z*:  $[\text{M}+\text{H}]^+$  calcd for  $\text{C}_{55}\text{H}_{65}\text{N}_4\text{O}_6\text{S}_2$  941.4340, found 941.4324.

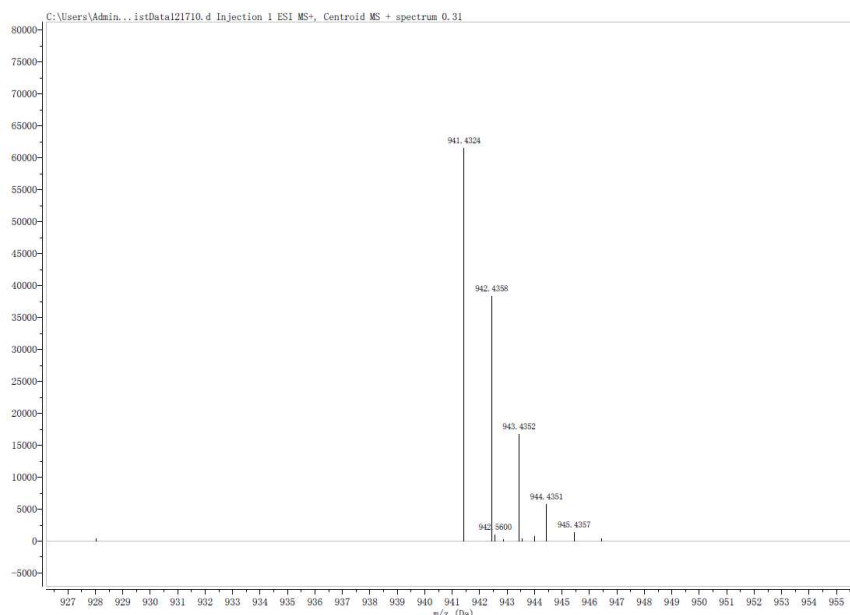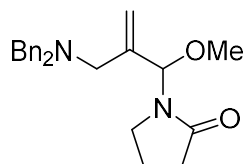

***1-(2-((dibenzylamino)methyl)-1-methoxyallyl)pyrrolidin-2-one (3h):***

Prepared via **general procedure 2** from N,N-dibenzyl-1-methoxymethanamine (48.2 mg, 0.2 mmol, 1.0 equiv) and 1-(propa-1,2-dien-1-yl)pyrrolidin-2-one (36.9 mg, 0.3 mmol, 1.5 equiv) according to the general procedure in the presence of CuCl<sub>2</sub> (2.7 mg, 0.02 mmol, 10 mol %), purified by silica gel column chromatography (petroleum ether/ EtOAc = 20:1 to 4:1) and obtained as colorless oil (49.6 mg, 68%).

**R<sub>f</sub>** (Petroleum ether/ EtOAc = 5:1) = 0.25.

**<sup>1</sup>H NMR** (300 MHz, CDCl<sub>3</sub>) δ 7.41-7.38 (m, 4H), 7.34-7.28 (m, 4H), 7.24-7.19 (m, 2H), 5.72 (s, 1H), 5.46 (s, 1H), 5.43 (s, 1H), 3.71 (d, *J* = 13.6 Hz, 2H), 3.29 (d, *J* = 13.6 Hz, 2H), 3.28 (s, 3H), 3.17-3.09 (m, 1H), 2.97 (d, *J* = 14.3 Hz, 1H), 2.89-2.83 (m, 1H), 2.76 (d, *J* = 14.3 Hz, 1H), 2.44-2.32 (m, 1H), 2.28-2.18 (m, 1H), 1.89-1.80 (m, 1H), 1.56-1.46 (m, 1H).

**<sup>13</sup>C NMR** (100 MHz, CDCl<sub>3</sub>) δ 176.1, 142.3, 139.4, 128.8, 128.3, 126.9, 115.5, 80.9, 58.5, 56.4, 55.9, 41.5, 31.7, 18.1.

**HRMS (ESI)** *m/z*: [M+H]<sup>+</sup> calcd for C<sub>23</sub>H<sub>29</sub>N<sub>2</sub>O<sub>2</sub> 365.2224, found 365.2229.

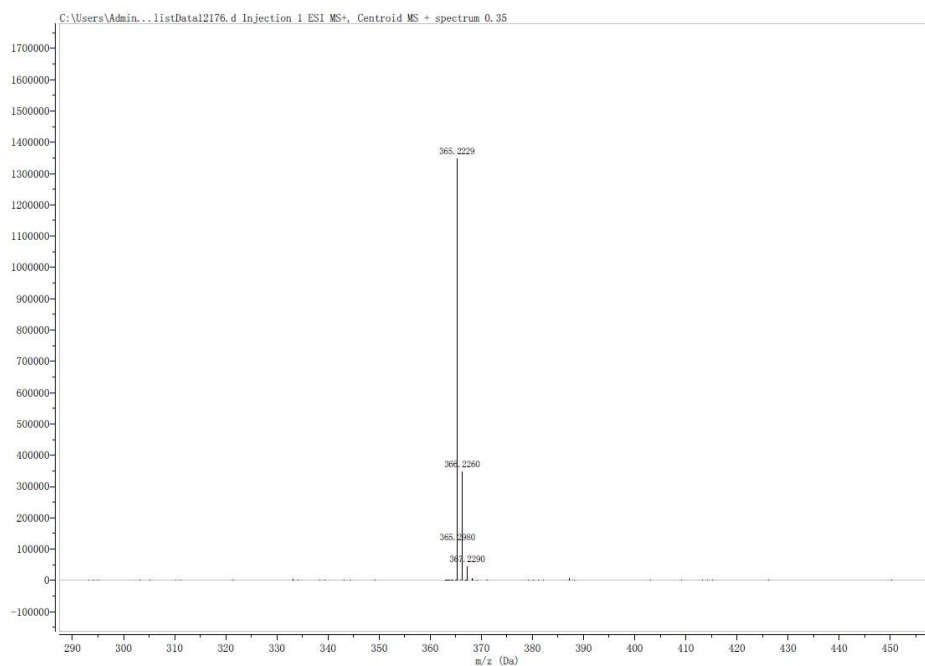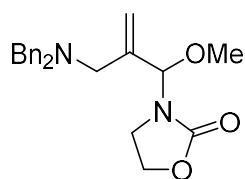

**3-(2-((dibenzylamino)methyl)-1-methoxyallyl)oxazolidin-2-one (3i):**

Prepared via **general procedure 2** from N,N-dibenzyl-1-methoxymethanamine (48.2 mg, 0.2 mmol, 1.0 equiv) and 3-(propa-1,2-dien-1-yl)oxazolidin-2-one (37.5 mg, 0.3 mmol, 1.5 equiv) according to the general procedure in the presence of CuCl<sub>2</sub> (2.7 mg, 0.02 mmol, 10 mol %), purified by silica gel column chromatography (petroleum ether/ EtOAc = 20:1 to 5:1) and obtained as a white solid (47.6 mg, 65%), mp: 81-82 °C.

**R<sub>f</sub>** (Petroleum ether/ EtOAc = 5:1) = 0.3.

**<sup>1</sup>H NMR** (400 MHz, CDCl<sub>3</sub>) δ 7.43-7.37 (m, 4H), 7.33 (t, *J* = 7.5 Hz, 4H), 7.26-7.21 (m, 2H), 5.57 (s, 1H), 5.45 (s, 1H), 5.42 (s, 1H), 4.23-4.17 (m, 1H), 3.79-3.72 (m, 3H), 3.38-3.32 (m, 4H), 3.24 (d, *J* = 13.6 Hz, 2H), 3.05 (d, *J* = 14.0 Hz, 1H), 2.96-2.90 (m, 1H), 2.79 (d, *J* = 14.0 Hz, 1H).

**<sup>13</sup>C NMR** (100 MHz, CDCl<sub>3</sub>) δ 158.5, 142.1, 139.2, 128.8, 128.4, 127.0, 116.3, 83.1, 62.1, 58.5, 56.6, 56.3, 39.1.

**HRMS (ESI)** m/z: [M+H]<sup>+</sup> calcd for C<sub>22</sub>H<sub>27</sub>N<sub>2</sub>O<sub>3</sub> 367.2016, found 367.2020.

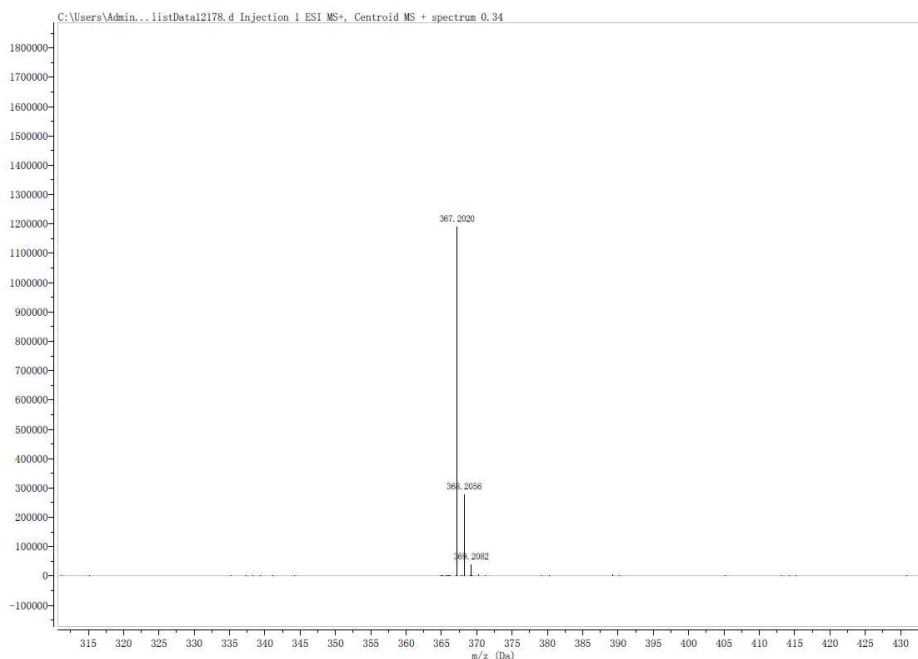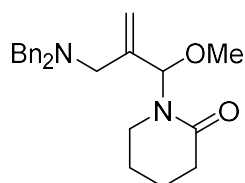

***1-(2-((dibenzylamino)methyl)-1-methoxyallyl)piperidin-2-one (3j):***

Prepared via **general procedure 2** from *N,N*-dibenzyl-1-methoxymethanamine (48.2 mg, 0.2 mmol, 1.0 equiv) and 1-(propa-1,2-dien-1-yl)piperidin-2-one (41.1 mg, 0.3 mmol, 1.5 equiv) according to the general procedure in the presence of  $\text{CuCl}_2$  (2.7 mg, 0.02 mmol, 10 mol %), purified by silica gel column chromatography (petroleum ether/ EtOAc = 20:1 to 4:1) and obtained as yellow oil (53.8 mg, 77%).

$R_f$  (Petroleum ether/ EtOAc = 5:1) = 0.25.

$^1\text{H NMR}$  (400 MHz,  $\text{CDCl}_3$ )  $\delta$  7.42-7.38 (m, 4H), 7.30 (t,  $J = 7.5$  Hz, 4H), 7.23-7.18 (m, 2H), 6.28 (s, 1H), 5.53 (s, 1H), 5.40 (s, 1H), 3.65 (d,  $J = 13.6$  Hz, 2H), 3.36 (d,  $J = 13.6$  Hz, 2H), 3.27 (s, 3H), 2.03-2.95 (m, 2H), 2.79-2.70 (m, 2H), 2.45-2.27 (m, 2H), 1.70-1.55 (m, 2H), 1.53-1.38 (m, 2H).

$^{13}\text{C NMR}$  (75 MHz,  $\text{CDCl}_3$ )  $\delta$  171.1, 142.4, 139.5, 128.8, 128.3, 126.8, 115.3, 82.0, 58.5, 56.0, 55.8, 40.2, 32.5, 22.8, 20.9.

**HRMS (ESI)**  $m/z$ :  $[\text{M}+\text{H}]^+$  calcd for  $\text{C}_{24}\text{H}_{31}\text{N}_2\text{O}_2$  379.2380, found 379.2386.

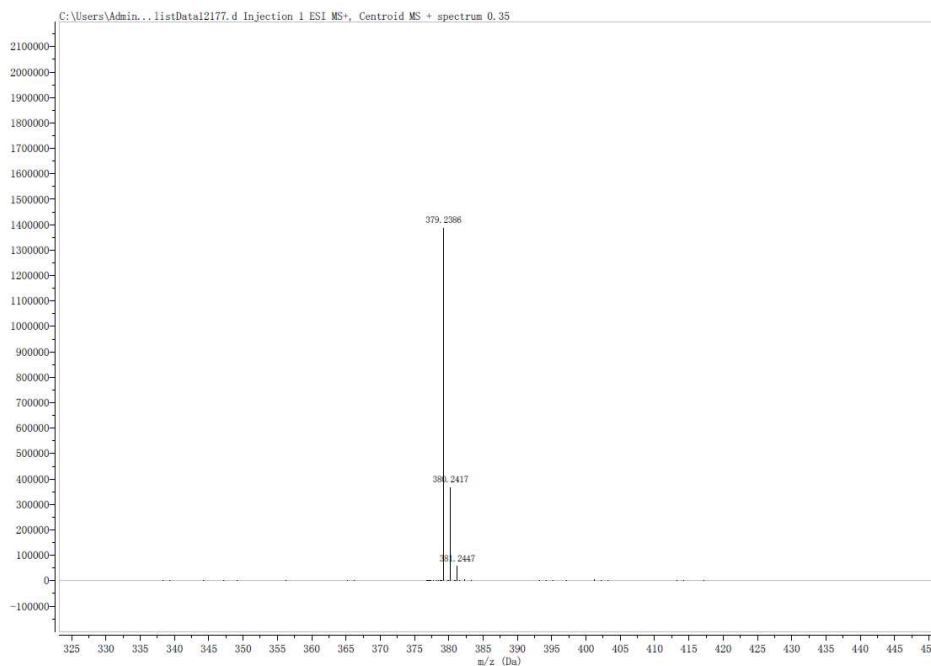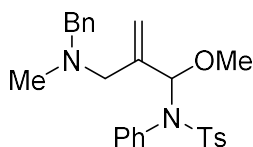

***N*-(2-((benzyl(methyl)amino)methyl)-1-methoxyallyl)-4-methyl-*N*-phenylbenzenesulfonamide**

**(3k):**

Prepared via **general procedure 2** from *N*-benzyl-1-methoxy-*N*-methylmethanamine (33.0 mg, 0.2 mmol, 1.0 equiv) and 4-methyl-*N*-phenyl-*N*-(propa-1,2-dien-1-yl)benzenesulfonamide (85.6 mg, 0.3 mmol, 1.5 equiv) according to the general procedure in the presence of CuCl<sub>2</sub> (2.7 mg, 0.02 mmol, 10 mol %), purified by silica gel column chromatography (petroleum ether/ EtOAc = 25:1 to 10:1) and obtained as yellow oil (72.1 mg, 80%).

**R<sub>f</sub>** (Petroleum ether/ EtOAc = 10:1) = 0.55.

**<sup>1</sup>H NMR** (400 MHz, CDCl<sub>3</sub>) δ 7.51-7.48 (m, 2H), 7.43-7.40 (m, 2H), 7.38-7.34 (m, 2H), 7.26-7.12 (m, 6H), 6.96-6.93 (m, 2H), 6.09 (s, 1H), 5.01 (s, 1H), 4.94 (s, 1H), 3.60 (d, *J* = 13.3 Hz, 1H), 3.46 (s, 3H), 3.34 (d, *J* = 13.3 Hz, 1H), 3.09 (d, *J* = 13.6 Hz, 1H), 2.59 (d, *J* = 13.6 Hz, 1H), 2.37 (s, 3H), 2.12 (s, 3H).

**<sup>13</sup>C NMR** (100 MHz, CDCl<sub>3</sub>) δ 143.2, 140.8, 139.3, 137.1, 135.6, 131.4, 129.0, 128.9, 128.4, 128.18, 128.16, 128.1, 127.0, 117.2, 89.0, 62.2, 60.0, 56.6, 42.3, 21.6.

**HRMS (ESI)** *m/z*: [M+H]<sup>+</sup> calcd for C<sub>26</sub>H<sub>31</sub>N<sub>2</sub>O<sub>3</sub>S 451.2050, found 451.2053.

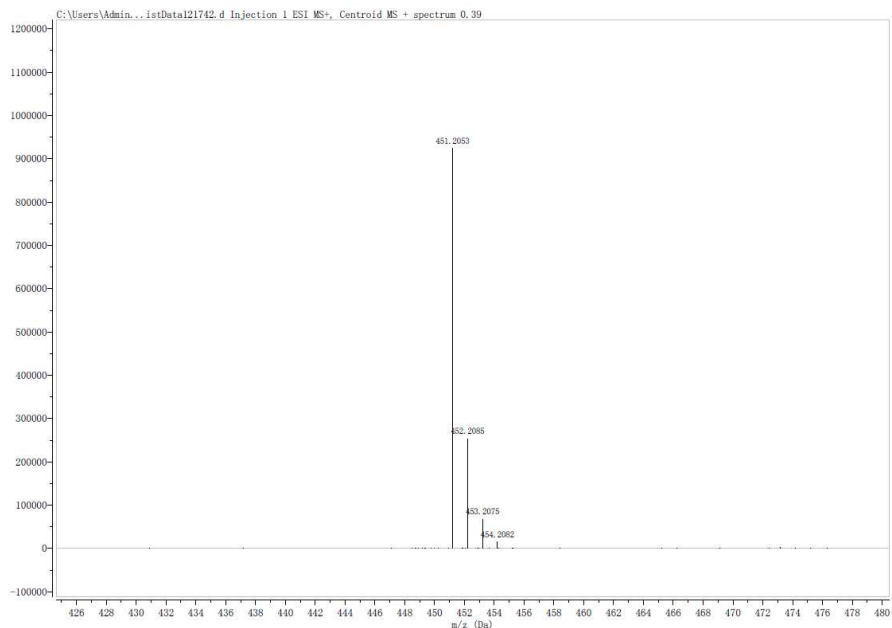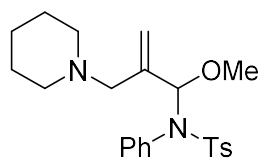

***N*-(1-methoxy-2-(piperidin-1-ylmethyl)allyl)-4-methyl-*N*-phenylbenzenesulfonamide (3l):**

Prepared via **general procedure 2** from 1-(methoxymethyl)piperidine (25.8 mg, 0.2 mmol, 1.0 equiv) and 4-methyl-*N*-phenyl-*N*-(propa-1,2-dien-1-yl)benzenesulfonamide (85.6 mg, 0.3 mmol, 1.5 equiv) according to the general procedure in the presence of CuCl<sub>2</sub> (2.7 mg, 0.02 mmol, 10 mol %), purified by silica gel column chromatography (petroleum ether/ EtOAc = 20:1 to 4:1) and obtained as a white solid (53.1 mg, 64%), mp: 62-63 °C.

**R<sub>f</sub>** (Petroleum ether/ EtOAc = 5:1) = 0.25.

**<sup>1</sup>H NMR** (400 MHz, CDCl<sub>3</sub>) δ 7.56 (d, *J* = 8.3 Hz, 2H), 7.24-7.16 (m, 5H), 7.04-7.01 (m, 2H), 5.97 (s, 1H), 4.92 (s, 1H), 4.91 (s, 1H), 3.47 (s, 3H), 2.91 (d, *J* = 13.8 Hz, 1H), 2.56 (d, *J* = 13.8 Hz, 1H), 2.40 (s, 3H), 2.38-2.31 (m, 2H), 2.28-2.18 (m, 2H), 1.62-1.55 (m, 4H), 1.43-1.41 (m, 2H).

**<sup>13</sup>C NMR** (75 MHz, CDCl<sub>3</sub>) δ 143.2, 140.4, 137.4, 135.6, 131.4, 129.0, 128.21, 128.20, 128.1, 116.7, 89.1, 61.2, 56.4, 54.7, 26.1, 24.5, 21.6.

**HRMS (ESI)** m/z: [M+H]<sup>+</sup> calcd for C<sub>23</sub>H<sub>31</sub>N<sub>2</sub>O<sub>3</sub>S 415.2050, found 415.2055.

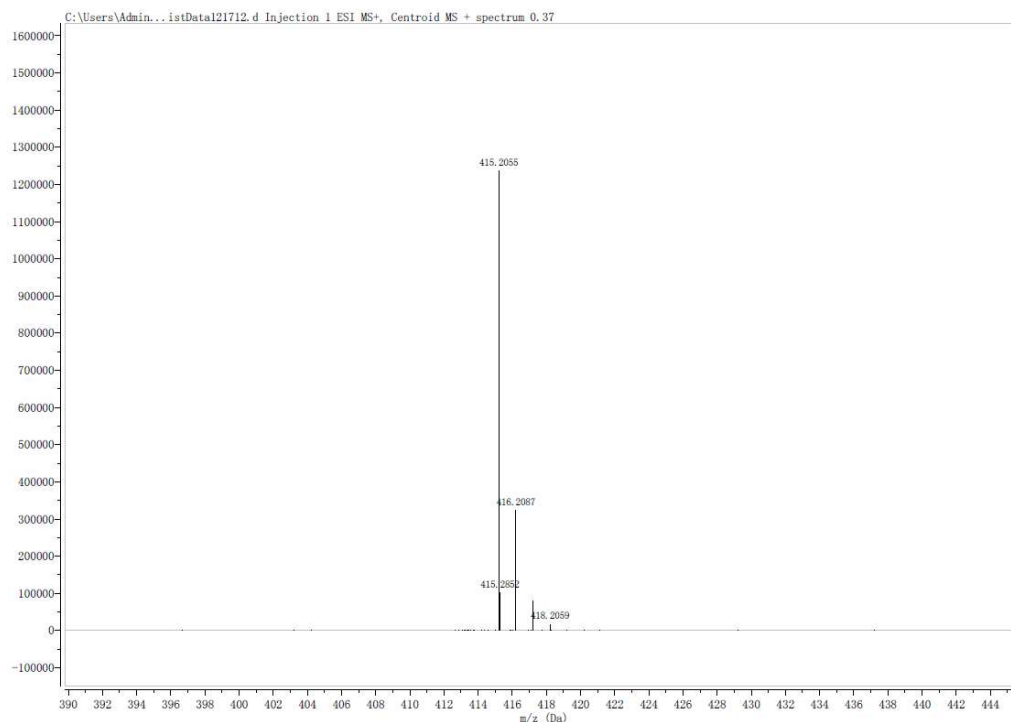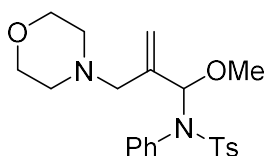

***N*-(1-methoxy-2-(morpholinomethyl)allyl)-4-methyl-*N*-phenylbenzenesulfonamide (3m):**

Prepared via **general procedure 2** from 4-(methoxymethyl)morpholine (26.2 mg, 0.2 mmol, 1.0 equiv) and 4-methyl-*N*-phenyl-*N*-(propa-1,2-dien-1-yl)benzenesulfonamide (85.6 mg, 0.3 mmol, 1.5 equiv) according to the general procedure in the presence of CuCl<sub>2</sub> (2.7 mg, 0.02 mmol, 10 mol %), purified by silica gel column chromatography (petroleum ether/ EtOAc = 20:1 to 5:1) and obtained as a white solid (71.6 mg, 86%), mp: 76-77 °C.

**R<sub>f</sub>** (Petroleum ether/ EtOAc = 5:1) = 0.3.

**<sup>1</sup>H NMR** (300 MHz, CDCl<sub>3</sub>) δ 7.54-7.50 (m, 2H), 7.25-7.16 (m, 5H), 7.07-7.03 (m, 2H), 6.00 (s, 1H), 4.94 (s, 2H), 3.78-3.66 (m, 4H), 3.44 (s, 3H), 3.01 (d, *J* = 13.7 Hz, 1H), 2.61 (d, *J* = 13.7 Hz, 1H), 2.48-2.41 (m, 2H), 2.39 (s, 3H), 2.38-2.30 (m, 2H).

**<sup>13</sup>C NMR** (100 MHz, CDCl<sub>3</sub>) δ 143.4, 139.5, 137.1, 135.5, 131.4, 129.1, 128.3, 128.0, 117.4, 88.9, 67.1, 60.8, 56.5, 53.7, 21.6.

**HRMS (ESI)** m/z: [M+H]<sup>+</sup> calcd for C<sub>22</sub>H<sub>29</sub>N<sub>2</sub>O<sub>4</sub>S 417.1843, found 417.1843.



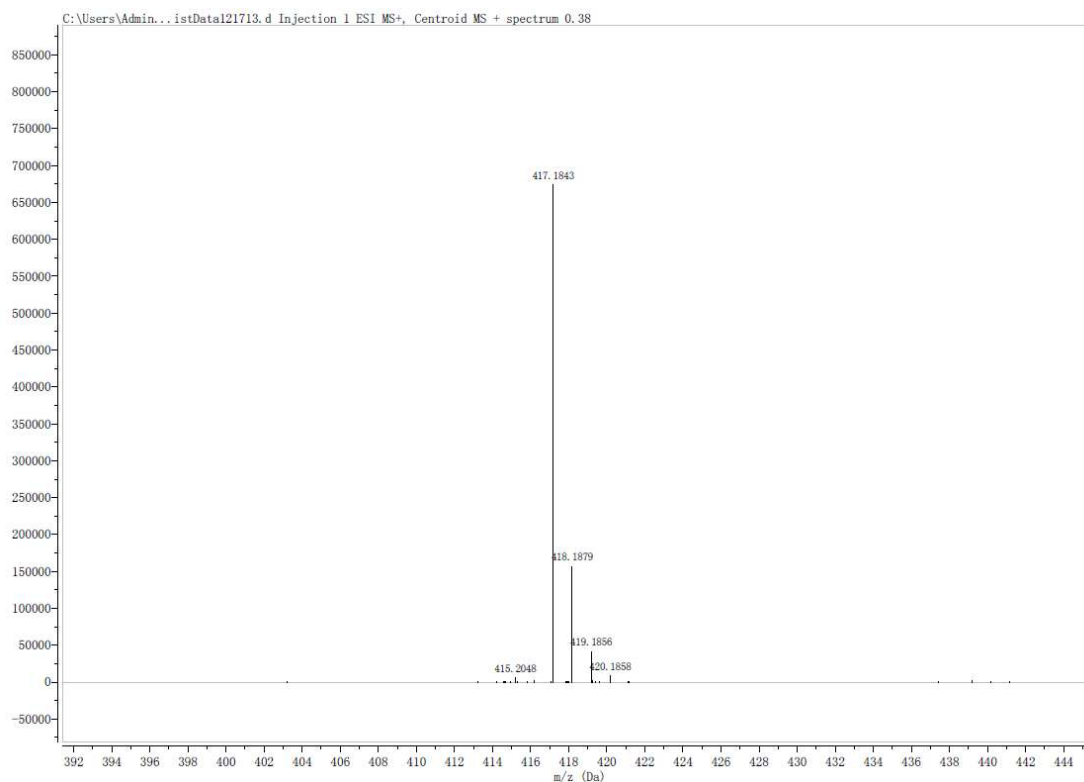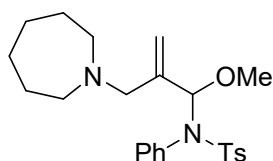

***N*-(2-(azepan-1-ylmethyl)-1-methoxyallyl)-4-methyl-N-phenylbenzenesulfonamide (3n):**

Prepared via **general procedure 2** from 1-(methoxymethyl)azepane (28.6 mg, 0.2 mmol, 1.0 equiv) and 4-methyl-N-phenyl-N-(propa-1,2-dien-1-yl)benzenesulfonamide (85.6 mg, 0.3 mmol, 1.5 equiv) according to the general procedure in the presence of CuCl<sub>2</sub> (2.7 mg, 0.02 mmol, 10 mol %), purified by silica gel column chromatography (petroleum ether/ EtOAc = 20:1 to 5:1) and obtained as colorless oil (57.4 mg, 67%).

**R<sub>f</sub>** (Petroleum ether/ EtOAc = 5:1) = 0.4.

**<sup>1</sup>H NMR** (400 MHz, CDCl<sub>3</sub>) δ 7.54 (d, *J* = 8.3 Hz, 2H), 7.24-7.16 (m, 5H), 7.05-7.03 (m, 2H), 6.06 (s, 1H), 4.91 (s, 1H), 4.86 (s, 1H), 3.45 (s, 3H), 3.02 (d, *J* = 13.9 Hz, 1H), 2.82 (d, *J* = 13.9 Hz, 1H), 2.62-2.51 (m, 4H), 2.40 (s, 3H), 1.70-1.62 (m, 8H).

**<sup>13</sup>C NMR** (100 MHz, CDCl<sub>3</sub>) δ 143.2, 141.6, 137.3, 135.7, 131.4, 129.0, 128.18, 128.15, 128.1, 116.4, 88.9, 60.7, 56.5, 55.5, 28.6, 27.1, 21.6.

**HRMS (ESI)** m/z: [M+H]<sup>+</sup> calcd for C<sub>24</sub>H<sub>33</sub>N<sub>2</sub>O<sub>3</sub>S 429.2206, found 429.2208.

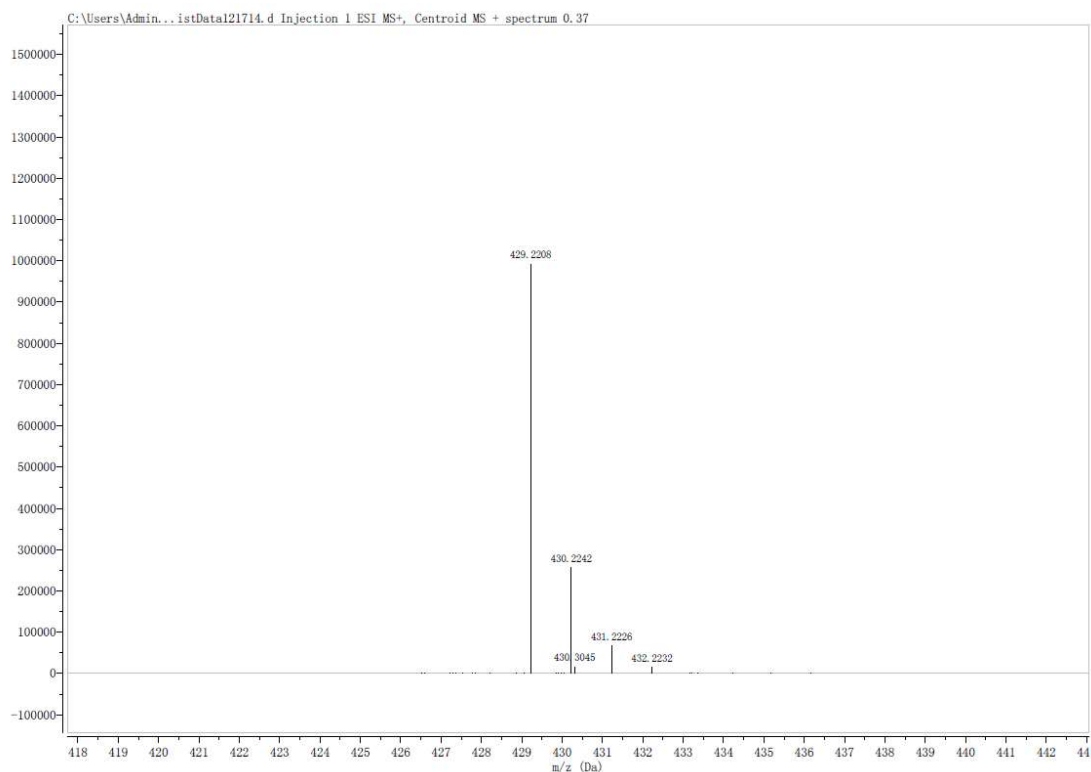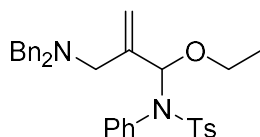

***N*-(2-((dibenzylamino)methyl)-1-ethoxyallyl)-4-methyl-*N*-phenylbenzenesulfonamide (3o):**

Prepared via **general procedure 2** from *N,N*-dibenzyl-1-ethoxymethanamine (51.1 mg, 0.2 mmol, 1.0 equiv) and 4-methyl-*N*-phenyl-*N*-(propa-1,2-dien-1-yl)benzenesulfonamide (85.6 mg, 0.3 mmol, 1.5 equiv) according to the general procedure in the presence of  $\text{CuCl}_2$  (2.7 mg, 0.02 mmol, 10 mol %), purified by silica gel column chromatography (petroleum ether/ EtOAc = 30:1 to 15:1) and obtained as a white solid (66.0 mg, 61%), mp: 49-50 °C.

$R_f$  (Petroleum ether/ EtOAc = 10:1) = 0.7.

$^1\text{H NMR}$  (400 MHz,  $\text{CDCl}_3$ )  $\delta$  7.47-7.43 (m, 4H), 7.41-7.35 (m, 6H), 7.26-7.24 (m, 2H), 7.17-7.11 (m, 3H), 7.04 (t,  $J = 7.7$  Hz, 2H), 6.77 (d,  $J = 7.5$  Hz, 2H), 6.18 (s, 1H), 5.13 (s, 1H), 5.01 (s, 1H), 3.74 (d,  $J = 13.7$  Hz, 2H), 3.69-3.63 (m, 1H), 3.53-3.46 (m, 1H), 3.23 (d,  $J = 13.7$  Hz, 2H), 3.10 (d,  $J = 14.3$  Hz, 1H), 2.66 (d,  $J = 14.3$  Hz, 1H), 2.38 (s, 3H), 1.14 (t,  $J = 7.0$  Hz, 3H).

$^{13}\text{C NMR}$  (100 MHz,  $\text{CDCl}_3$ )  $\delta$  143.1, 141.1, 139.3, 137.0, 135.8, 131.4, 128.8, 128.7, 128.5, 128.3, 128.0, 127.9, 126.9, 117.2, 87.6, 64.5, 58.4, 56.4, 21.6, 15.0.

**HRMS (ESI) m/z:**  $[M+H]^+$  calcd for  $C_{33}H_{37}N_2O_3S$  541.2519, found 541.2517.

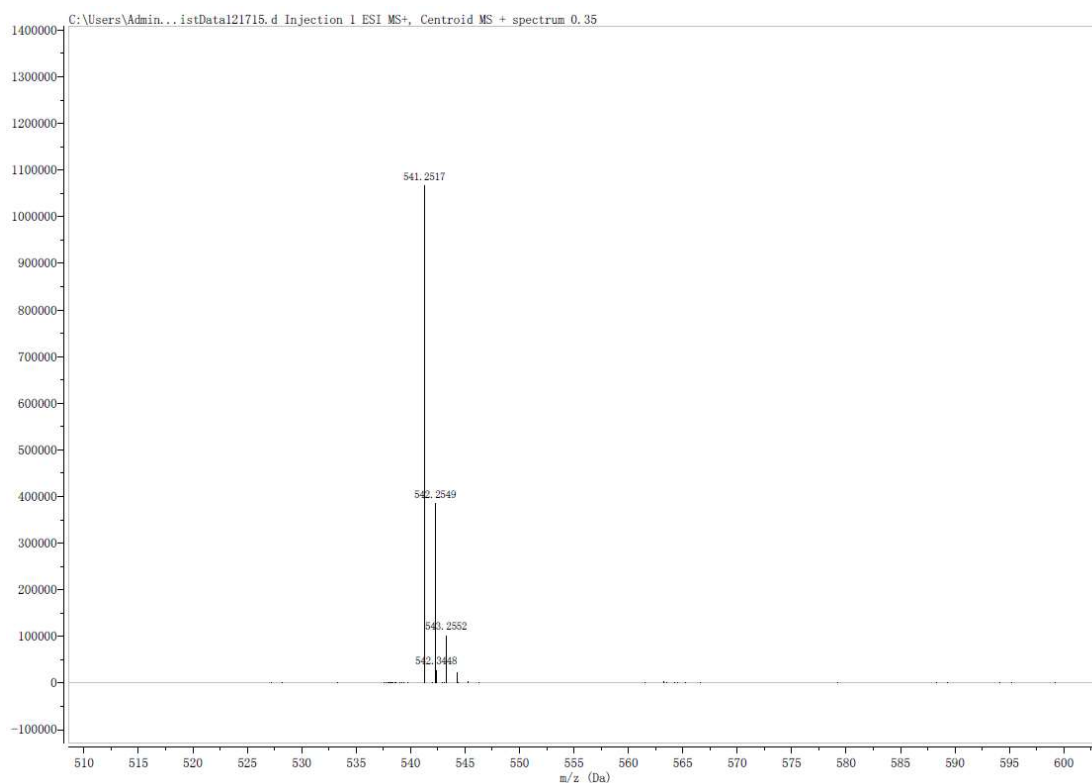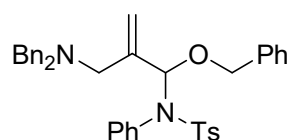

***N*-(1-(benzyloxy)-2-((dibenzylamino)methyl)allyl)-4-methyl-N-phenylbenzenesulfonamide (3p):**

Prepared via **general procedure 2** from *N,N*-dibenzyl-1-(benzyloxy)methanamine (63.5 mg, 0.2 mmol, 1.0 equiv) and 4-methyl-*N*-phenyl-*N*-(propa-1,2-dien-1-yl)benzenesulfonamide (85.6 mg, 0.3 mmol, 1.5 equiv) according to the general procedure in the presence of  $CuCl_2$  (2.7 mg, 0.02 mmol, 10 mol %), purified by silica gel column chromatography (petroleum ether/ EtOAc = 30:1 to 15:1) and obtained as colorless oil (86.8 mg, 72%).

**R<sub>f</sub>** (Petroleum ether/ EtOAc = 10:1) = 0.65.

**<sup>1</sup>H NMR** (400 MHz,  $CDCl_3$ )  $\delta$  7.47-7.44 (m, 4H), 7.41-7.32 (m, 6H), 7.32-7.26 (m, 5H), 7.21-7.13 (m, 3H), 7.08-7.04 (m, 2H), 6.99 (d,  $J = 8.1$  Hz, 2H), 6.82-6.79 (m, 2H), 6.34 (s, 1H), 5.17 (s, 1H), 5.08 (s, 1H), 4.67 (d,  $J = 11.4$  Hz, 1H), 4.53 (d,  $J = 11.4$  Hz, 1H), 3.74 (d,  $J = 13.8$  Hz, 2H), 3.28 (d,  $J = 13.8$  Hz, 2H), 3.12 (d,  $J = 14.4$  Hz, 1H), 2.71 (d,  $J = 14.4$  Hz, 1H), 2.33 (s, 3H).

$^{13}\text{C}$  NMR (75 MHz,  $\text{CDCl}_3$ )  $\delta$  143.1, 140.8, 139.3, 137.6, 136.9, 135.6, 131.4, 128.9, 128.8, 128.5, 128.23, 128.17, 128.1, 128.0, 127.5, 127.4, 127.0, 117.6, 87.7, 70.8, 58.5, 56.5, 21.5.

HRMS (ESI)  $m/z$ :  $[\text{M}+\text{H}]^+$  calcd for  $\text{C}_{38}\text{H}_{39}\text{N}_2\text{O}_3\text{S}$  603.2676, found 603.2673.

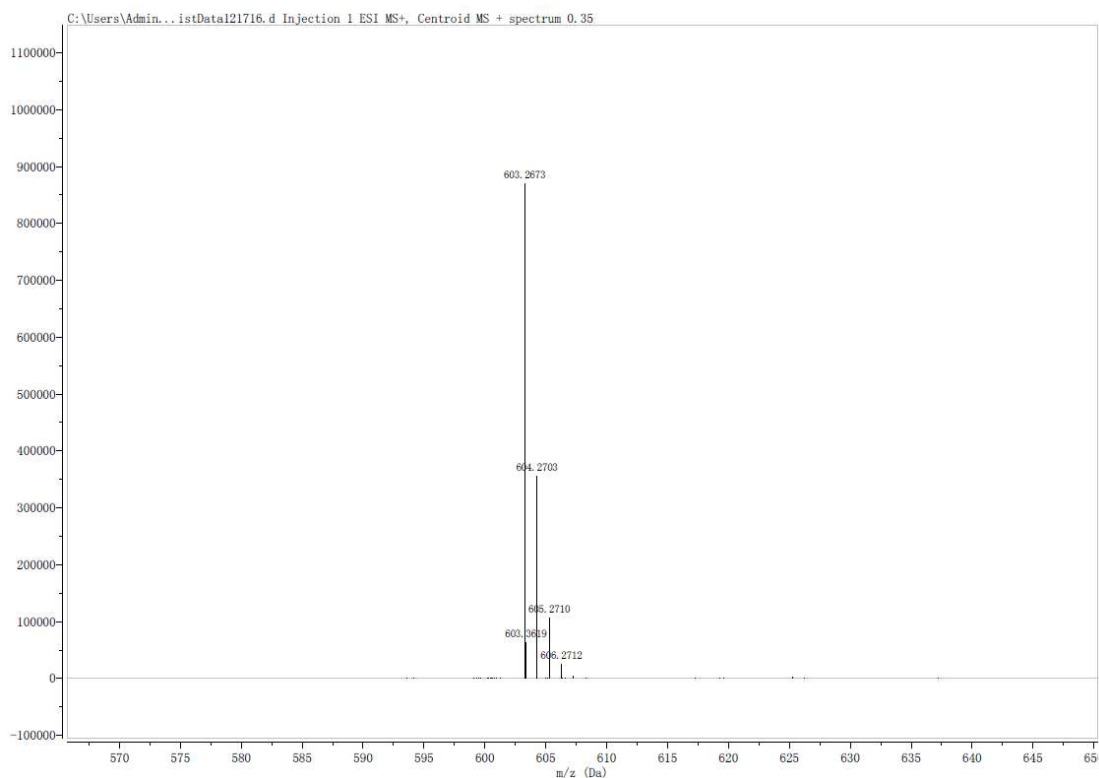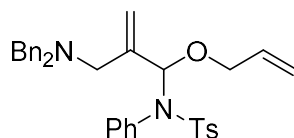

***N*-(1-(allyloxy)-2-((dibenzylamino)methyl)allyl)-4-methyl-N-phenylbenzenesulfonamide (3q):**

Prepared via **general procedure 2** from 1-(allyloxy)-*N,N*-dibenzylmethanamine (53.4 mg, 0.2 mmol, 1.0 equiv) and 4-methyl-*N*-phenyl-*N*-(propa-1,2-dien-1-yl)benzenesulfonamide (85.6 mg, 0.3 mmol, 1.5 equiv) according to the general procedure in the presence of  $\text{CuCl}_2$  (2.7 mg, 0.02 mmol, 10 mol %), purified by silica gel column chromatography (petroleum ether/ EtOAc = 30:1 to 15:1) and obtained as a white solid (67.4 mg, 61%), mp: 63-64 °C.

$R_f$  (Petroleum ether/ EtOAc = 10:1) = 0.7.

$^1\text{H}$  NMR (400 MHz,  $\text{CDCl}_3$ )  $\delta$  7.47-7.43 (m, 4H), 7.40-7.35 (m, 6H), 7.27-7.23 (m, 2H), 7.17-7.13 (m, 1H), 7.10 (d,  $J = 8.1$  Hz, 2H), 7.06-7.02 (m, 2H), 6.76 (d,  $J = 7.5$  Hz, 2H), 6.25 (s, 1H), 5.91-5.82 (m, 1H), 5.19-5.10 (m, 3H), 5.03 (s, 1H), 4.19-4.15 (m, 1H), 4.03-3.98 (m, 1H), 3.74 (d,  $J =$

13.8 Hz, 2H), 3.23 (d,  $J = 13.8$  Hz, 2H), 3.10 (d,  $J = 14.3$  Hz, 1H), 2.66 (d,  $J = 14.3$  Hz, 1H), 2.36 (s, 3H).

$^{13}\text{C}$  NMR (100 MHz,  $\text{CDCl}_3$ )  $\delta$  143.1, 140.8, 139.3, 136.8, 135.7, 133.8, 131.4, 128.83, 128.75, 128.5, 128.3, 128.1, 128.0, 127.0, 117.5, 116.7, 87.4, 69.8, 58.5, 56.5, 21.6.

HRMS (ESI)  $m/z$ :  $[\text{M}+\text{H}]^+$  calcd for  $\text{C}_{34}\text{H}_{37}\text{N}_2\text{O}_3\text{S}$  553.2519, found 553.2518.

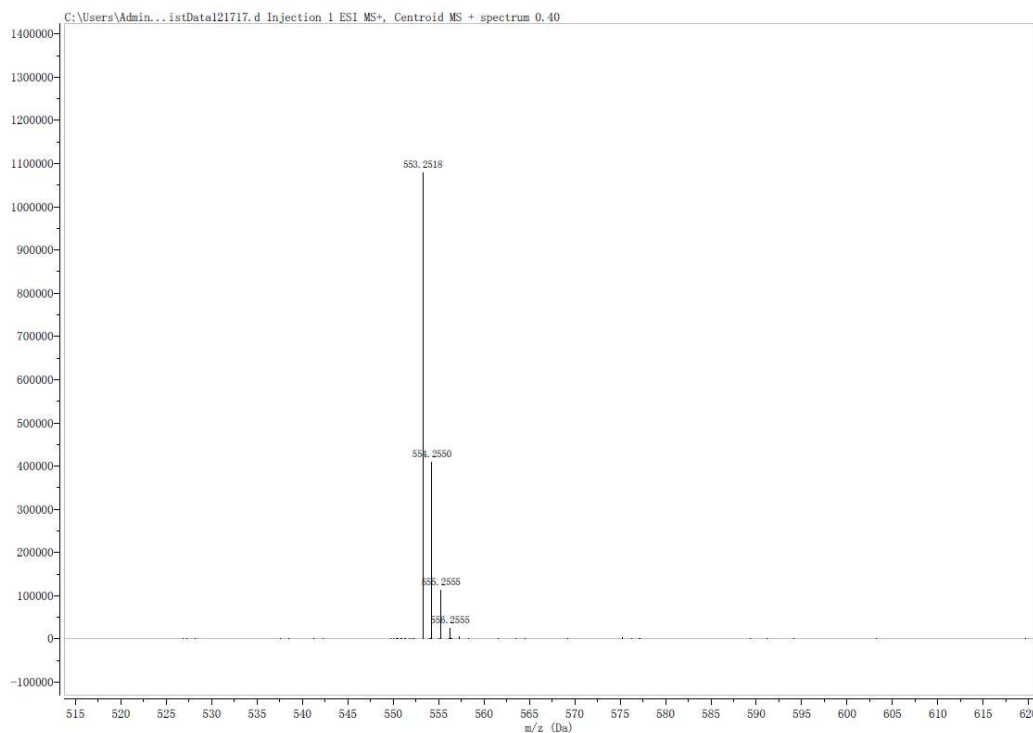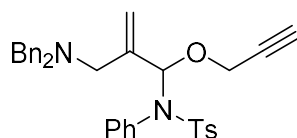

***N***-2-((dibenzylamino)methyl)-1-(prop-2-yn-1-yloxy)allyl)-4-methyl-N-phenylbenzenesulfonamide (**3r**):

Prepared via **general procedure 2** from N,N-dibenzyl-1-(prop-2-yn-1-yloxy)methanamine (53.0 mg, 0.2 mmol, 1.0 equiv) and 4-methyl-N-phenyl-N-(propa-1,2-dien-1-yl)benzenesulfonamide (85.6 mg, 0.3 mmol, 1.5 equiv) according to the general procedure in the presence of JohnPhosAu(MeCN)SbF<sub>6</sub> (7.7 mg, 0.01 mmol, 5 mol %), purified by silica gel column chromatography (petroleum ether/ EtOAc = 30:1 to 15:1) and obtained as colorless oil (82.6 mg, 75%).

$R_f$  (Petroleum ether/ EtOAc = 10:1) = 0.6.

**<sup>1</sup>H NMR** (400 MHz, CDCl<sub>3</sub>) δ 7.49-7.44 (m, 6H), 7.40-7.35 (m, 4H), 7.28-7.22 (m, 2H), 7.17-7.12 (m, 3H), 7.06-7.02 (m, 2H), 6.75-6.71 (m, 2H), 6.39 (s, 1H), 5.14 (s, 1H), 5.00 (s, 1H), 4.20 (d, *J* = 2.4 Hz, 2H), 3.76 (d, *J* = 13.8 Hz, 2H), 3.24 (d, *J* = 13.8 Hz, 2H), 3.12 (d, *J* = 14.3 Hz, 1H), 2.66 (d, *J* = 14.3 Hz, 1H), 2.44 (t, *J* = 2.4 Hz, 1H), 2.37 (s, 3H).

**<sup>13</sup>C NMR** (75 MHz, CDCl<sub>3</sub>) δ 143.2, 140.3, 139.2, 136.7, 135.5, 131.4, 128.9, 128.8, 128.5, 128.4, 128.12, 128.08, 127.0, 117.9, 87.0, 79.0, 75.2, 58.4, 56.5, 56.2, 21.6.

**HRMS (ESI)** *m/z*: [M+H]<sup>+</sup> calcd for C<sub>34</sub>H<sub>35</sub>N<sub>2</sub>O<sub>3</sub>S 551.2363, found 551.2367.

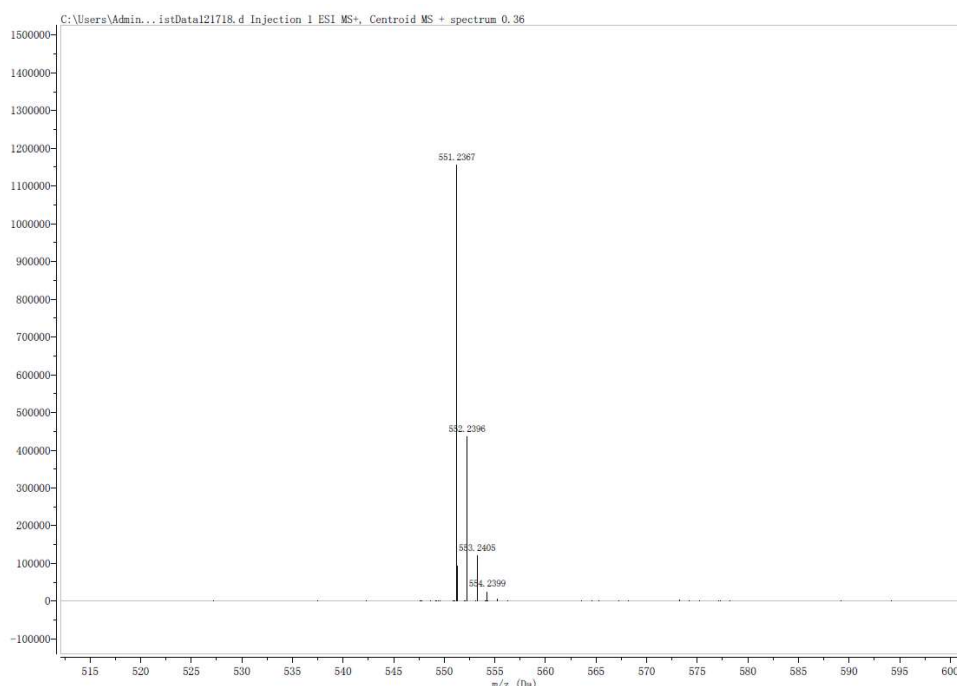

### General procedure for Scheme 3

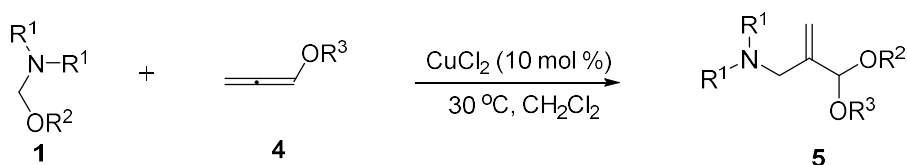

To a dry tube was added CuCl<sub>2</sub> (2.7 mg, 0.02 mmol, 0.1 equiv), **1** (0.2 mmol, 1.0 equiv), **4** (0.3 mmol, 1.5 equiv), and anhydrous DCM (4 mL) under argon atmosphere. Then, the mixture was stirred at 30 °C in a heating block for 12 h. The reaction mixture was concentrated under vacuum; the crude residue was purified by silica gel column chromatography to give products **5**.

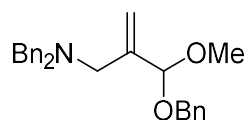

***N,N*-dibenzyl-2-((benzyloxy)(methoxy)methyl)prop-2-en-1-amine (5a):**

Prepared via **general procedure 3** from *N,N*-dibenzyl-1-methoxymethanamine (48.2 mg, 0.2 mmol, 1.0 equiv) and ((propa-1,2-dien-1-yloxy)methyl)benzene (43.8 mg, 0.3 mmol, 1.5 equiv) according to the general procedure in the presence of CuCl<sub>2</sub> (4.5 mg, 0.02 mmol, 10 mol %), purified by silica gel column chromatography (petroleum ether/ EtOAc = 35:1 to 20:1) and obtained as yellow oil (65.9 mg, 85%).

Gram-scale reaction: *N,N*-dibenzyl-1-methoxymethanamine (1.15 g, 4.80 mmol, 1.0 equiv) and ((propa-1,2-dien-1-yloxy)methyl)benzene (1.05 g, 7.20 mmol, 1.5 equiv), CuCl<sub>2</sub> (64 mg, 0.48 mmol, 10 mol %) in DCM (48 mL), purified by silica gel column chromatography (petroleum ether/ EtOAc = 35:1 to 20:1) and obtained as yellow oil (65.9 mg, 85%).

**R<sub>f</sub>** (Petroleum ether/ EtOAc = 10:1) = 0.7.

**<sup>1</sup>H NMR** (400 MHz, CDCl<sub>3</sub>) δ 7.37-7.34 (m, 4H), 7.32-7.27 (m, 7H), 7.24-7.19 (m, 4H), 5.49 (s, 1H), 5.46 (s, 1H), 5.00 (s, 1H), 4.49 (d, *J* = 11.8 Hz, 1H), 4.43 (d, *J* = 11.8 Hz, 1H), 3.55 (s, 4H), 3.27 (s, 3H), 3.07 (s, 2H).

**<sup>13</sup>C NMR** (100 MHz, CDCl<sub>3</sub>) δ 142.9, 139.6, 138.1, 128.7, 128.4, 128.3, 127.8, 127.5, 126.9, 115.6, 101.8, 67.5, 58.2, 55.5, 53.5.

**HRMS (ESI)** *m/z*: [M+H]<sup>+</sup> calcd for C<sub>26</sub>H<sub>30</sub>NO<sub>2</sub> 388.2271, found 388.2275.

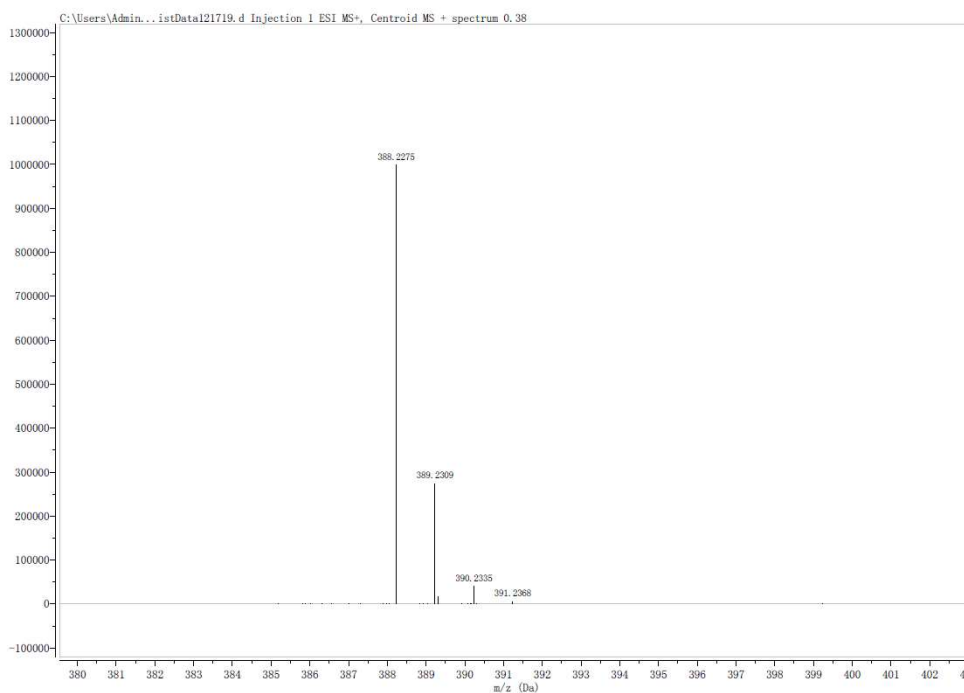

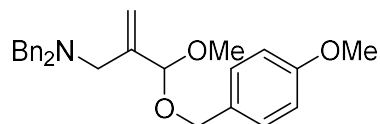

***N,N*-dibenzyl-2-(methoxy((4-methoxybenzyl)oxy)methyl)prop-2-en-1-amine (5b):**

Prepared via **general procedure 3** from *N,N*-dibenzyl-1-methoxymethanamine (48.2 mg, 0.2 mmol, 1.0 equiv) and 1-methoxy-4-((propa-1,2-dien-1-yloxy)methyl)benzene (52.8 mg, 0.3 mmol, 1.5 equiv) according to the general procedure in the presence of  $\text{CuCl}_2$  (4.5 mg, 0.02 mmol, 10 mol %), purified by silica gel column chromatography (petroleum ether/ EtOAc = 30:1 to 15:1) and obtained as yellow oil (56.8 mg, 68%).

$R_f$  (Petroleum ether/ EtOAc = 10:1) = 0.5.

$^1\text{H NMR}$  (400 MHz,  $\text{CDCl}_3$ )  $\delta$  7.37-7.34 (m, 4H), 7.29 (t,  $J = 7.4$  Hz, 4H), 7.23-7.20 (m, 2H), 7.14 (d,  $J = 8.5$  Hz, 2H), 6.82 (d,  $J = 8.5$  Hz, 2H), 5.48 (s, 1H), 5.44 (s, 1H), 4.96 (s, 1H), 4.42 (d,  $J = 11.4$  Hz, 1H), 4.36 (d,  $J = 11.4$  Hz, 1H), 3.79 (s, 3H), 3.54 (s, 4H), 3.25 (s, 3H), 3.06 (s, 2H).

$^{13}\text{C NMR}$  (75 MHz,  $\text{CDCl}_3$ )  $\delta$  159.1, 142.9, 139.6, 130.1, 129.4, 128.6, 128.2, 126.8, 115.4, 113.7, 101.6, 67.3, 58.2, 55.4, 55.3, 53.5.

**HRMS (ESI)  $m/z$ :  $[\text{M}+\text{H}]^+$  calcd for  $\text{C}_{27}\text{H}_{32}\text{NO}_3$  418.2377, found 418.2382.**

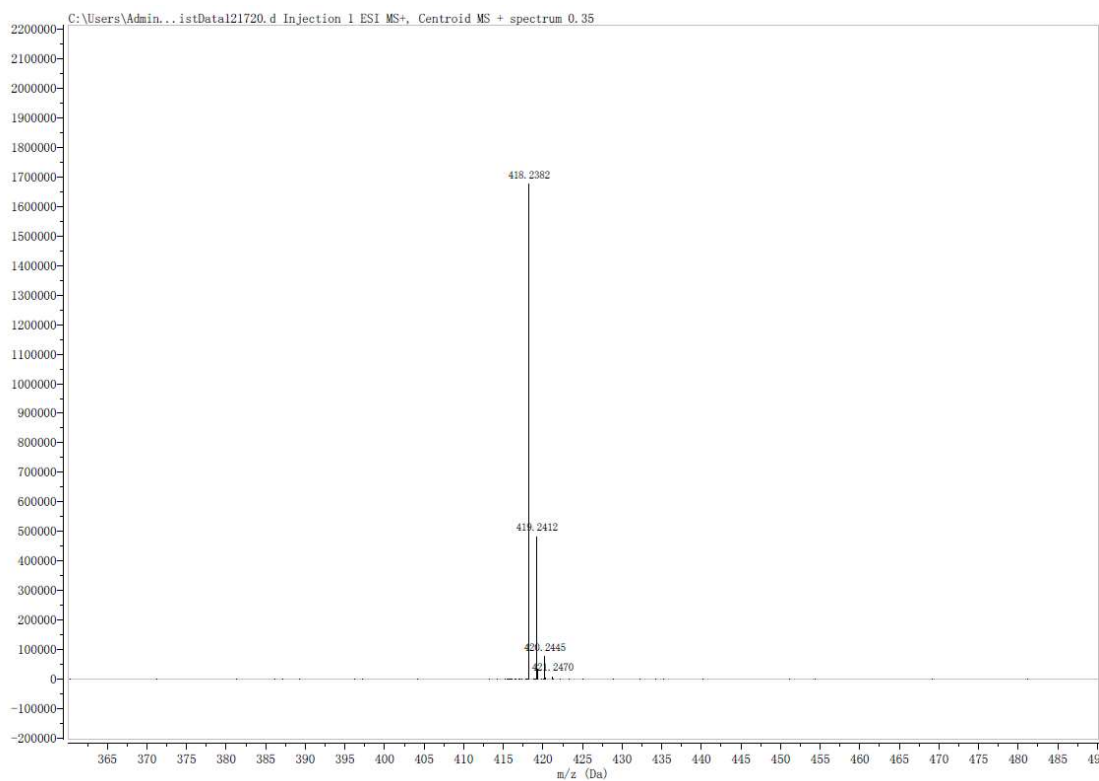



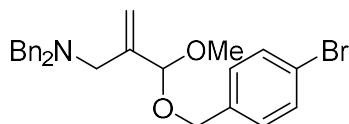

***N,N*-dibenzyl-2-(((4-bromobenzyl)oxy)(methoxy)methyl)prop-2-en-1-amine (5c):**

Prepared via **general procedure 3** from *N,N*-dibenzyl-1-methoxymethanamine (48.2 mg, 0.2 mmol, 1.0 equiv) and 1-bromo-4-((propa-1,2-dien-1-yloxy)methyl)benzene (67.5 mg, 0.3 mmol, 1.5 equiv) according to the general procedure in the presence of  $\text{CuCl}_2$  (4.5 mg, 0.02 mmol, 10 mol %), purified by silica gel column chromatography (petroleum ether/ EtOAc = 30:1 to 15:1) and obtained as yellow oil (75.6 mg, 81%).

$R_f$  (Petroleum ether/ EtOAc = 10:1) = 0.65.

$^1\text{H NMR}$  (400 MHz,  $\text{CDCl}_3$ )  $\delta$  7.40-7.34 (m, 6H), 7.29 (t,  $J = 7.4$  Hz, 4H), 7.23-7.19 (m, 2H), 7.05 (d,  $J = 8.2$  Hz, 2H), 5.48 (s, 1H), 5.44 (s, 1H), 4.99 (s, 1H), 4.41 (d,  $J = 12.1$  Hz, 1H), 4.34 (d,  $J = 12.0$  Hz, 1H), 3.58-3.49 (m, 4H), 3.25 (s, 3H), 3.09-3.00 (m, 2H).

$^{13}\text{C NMR}$  (75 MHz,  $\text{CDCl}_3$ )  $\delta$  142.7, 139.5, 137.2, 131.4, 129.4, 128.7, 128.3, 126.9, 121.4, 115.8, 101.7, 66.5, 58.2, 55.6, 53.6.

**HRMS (ESI)  $m/z$ :**  $[\text{M}+\text{H}]^+$  calcd for  $\text{C}_{26}\text{H}_{29}\text{BrNO}_2$  466.1376, found 466.1378.

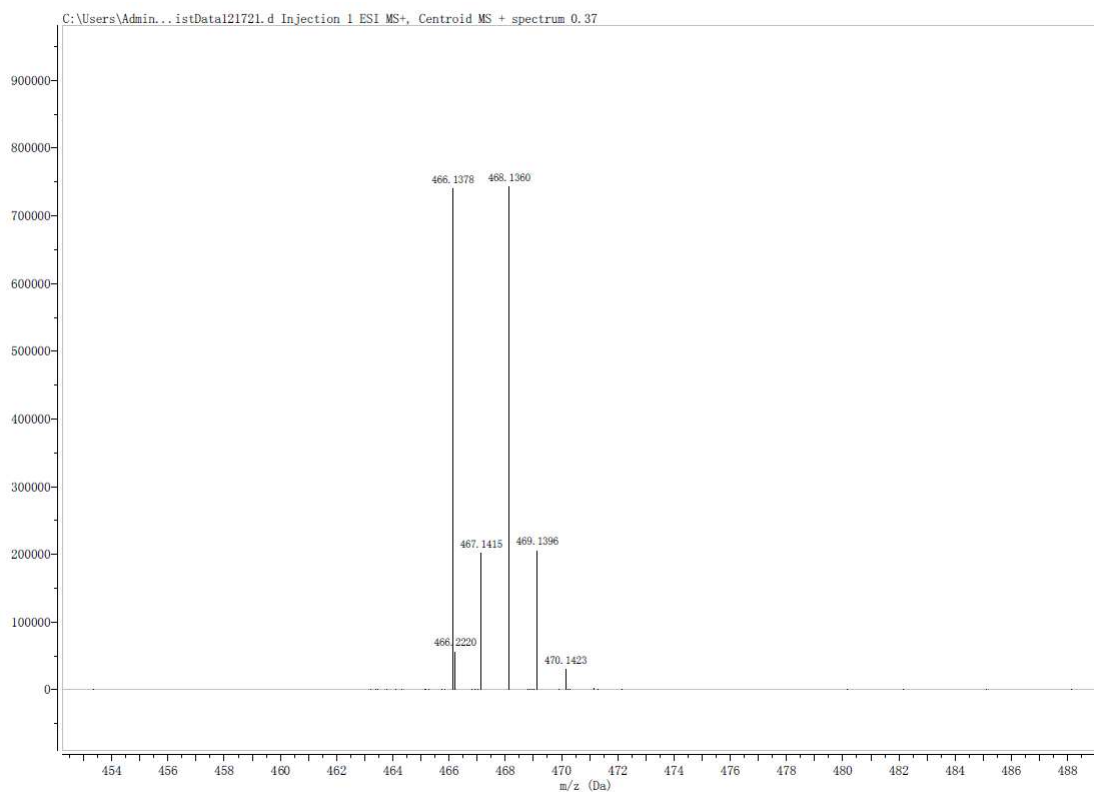

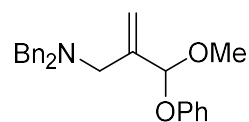

***N,N-dibenzyl-2-(methoxy(phenoxy)methyl)prop-2-en-1-amine (5d):***

Prepared via **general procedure 3** from *N,N*-dibenzyl-1-methoxymethanamine (48.2 mg, 0.2 mmol, 1.0 equiv) and (propa-1,2-dien-1-yloxy)benzene (39.6 mg, 0.3 mmol, 1.5 equiv) according to the general procedure in the presence of  $\text{CuCl}_2$  (4.5 mg, 0.02 mmol, 10 mol %), purified by silica gel column chromatography (petroleum ether/ EtOAc = 35:1 to 20:1) and obtained as yellow oil (49.3 mg, 66%).

$R_f$  (Petroleum ether/ EtOAc = 10:1) = 0.75.

$^1\text{H NMR}$  (400 MHz,  $\text{CDCl}_3$ )  $\delta$  7.38-7.35 (m, 4H), 7.30 (t,  $J = 7.4$  Hz, 4H), 7.25-7.20 (m, 4H), 6.99-6.92 (m, 3H), 5.55 (s, 1H), 5.52 (s, 1H), 5.47 (s, 1H), 3.68 (d,  $J = 13.8$  Hz, 2H), 3.48 (d,  $J = 13.8$  Hz, 2H), 3.28 (s, 3H), 3.22 (d,  $J = 14.3$  Hz, 1H), 3.06 (d,  $J = 14.3$  Hz, 1H).

$^{13}\text{C NMR}$  (75 MHz,  $\text{CDCl}_3$ )  $\delta$  157.3, 142.5, 139.4, 129.4, 128.7, 128.3, 126.9, 121.9, 117.0, 116.3, 102.0, 58.2, 55.6, 54.2.

**HRMS (ESI)**  $m/z$ :  $[\text{M}+\text{H}]^+$  calcd for  $\text{C}_{25}\text{H}_{28}\text{NO}_2$  374.2115, found 374.2121.

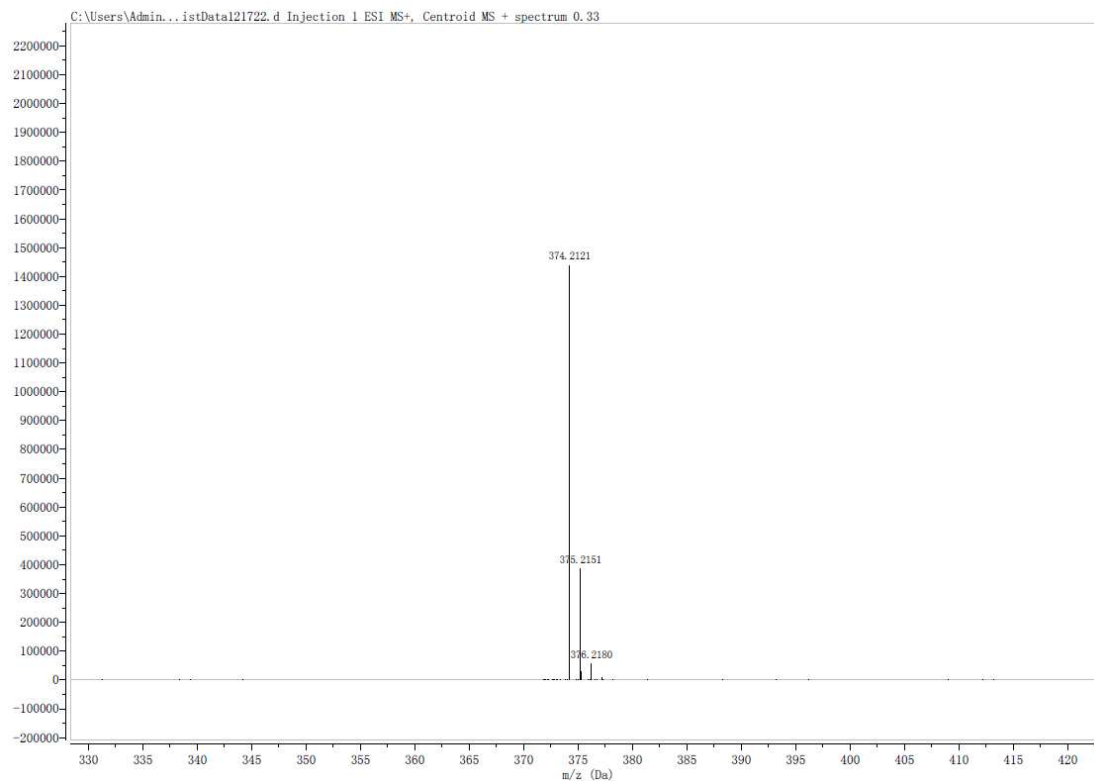

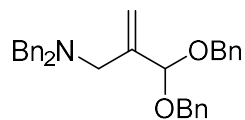

***N,N*-dibenzyl-2-(bis(benzyloxy)methyl)prop-2-en-1-amine (5e):**

Prepared via **general procedure 3** from *N,N*-dibenzyl-1-(benzyloxy)methanamine (63.4 mg, 0.2 mmol, 1.0 equiv) and ((propa-1,2-dien-1-yloxy)methyl)benzene (43.8 mg, 0.3 mmol, 1.5 equiv) according to the general procedure in the presence of  $\text{CuCl}_2$  (4.5 mg, 0.02 mmol, 10 mol %), purified by silica gel column chromatography (petroleum ether/ EtOAc = 35:1 to 20:1) and obtained as yellow oil (57.5 mg, 62%).

$R_f$  (Petroleum ether/ EtOAc = 10:1) = 0.65.

$^1\text{H NMR}$  (400 MHz,  $\text{CDCl}_3$ )  $\delta$  7.35-7.27 (m, 10H), 7.27-7.18 (m, 10H), 5.55 (s, 1H), 5.51 (s, 1H), 5.22 (s, 1H), 4.52 (d,  $J = 11.9$  Hz, 2H), 4.45 (d,  $J = 11.8$  Hz, 2H), 3.54 (s, 4H), 3.11 (s, 2H).

$^{13}\text{C NMR}$  (75 MHz,  $\text{CDCl}_3$ )  $\delta$  142.9, 139.5, 138.1, 128.7, 128.4, 128.3, 127.8, 127.5, 126.9, 115.9, 100.0, 67.4, 58.2, 55.6.

**HRMS (ESI)**  $m/z$ :  $[\text{M}+\text{H}]^+$  calcd for  $\text{C}_{32}\text{H}_{34}\text{NO}_2$  464.2584, found 464.2585.

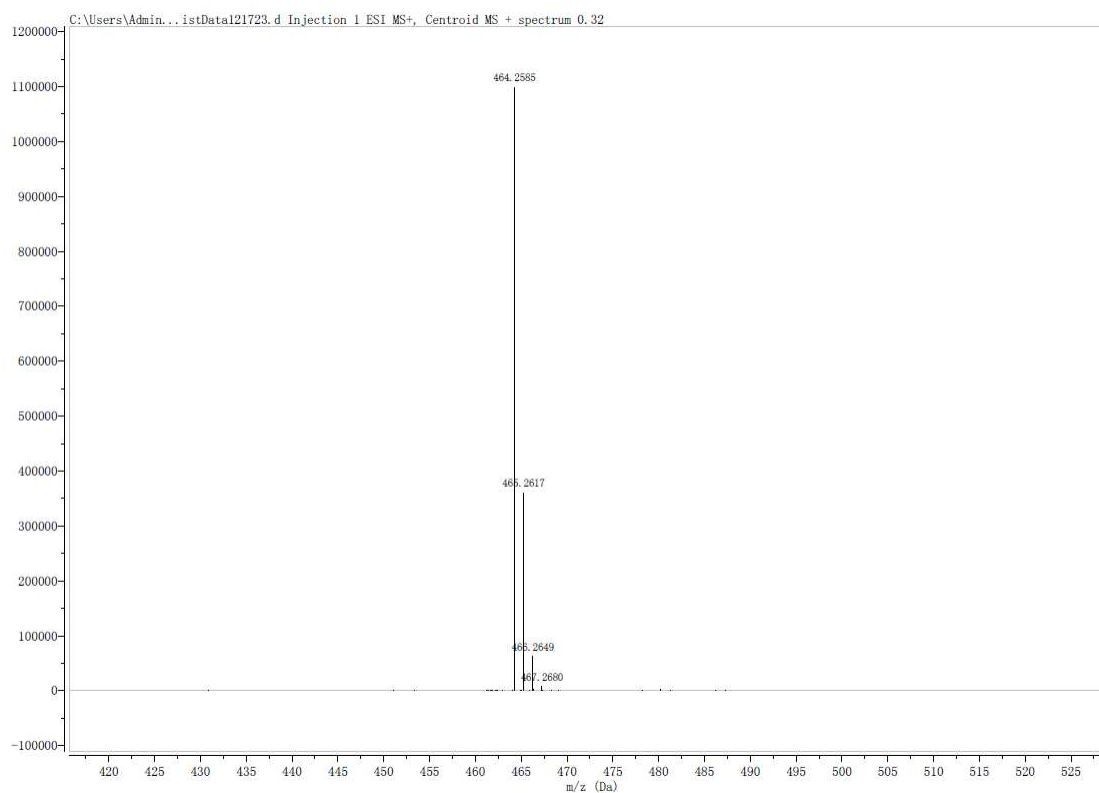

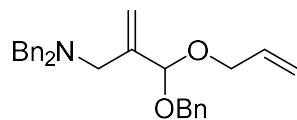

**2-((allyloxy)(benzyloxy)methyl)-N,N-dibenzylprop-2-en-1-amine (5f):**

Prepared via **general procedure 3** from 1-(allyloxy)-N,N-dibenzylmethanamine (53.4mg, 0.2 mmol, 1.0 equiv) and ((propa-1,2-dien-1-yloxy)methyl)benzene (43.8 mg, 0.3 mmol, 1.5 equiv) according to the general procedure in the presence of CuCl<sub>2</sub> (4.5 mg, 0.02 mmol, 10 mol %), purified by silica gel column chromatography (petroleum ether/ EtOAc = 35:1 to 20:1) and obtained as yellow oil (51.3 mg, 62%).

**R<sub>f</sub>** (Petroleum ether/ EtOAc = 10:1) = 0.75.

**<sup>1</sup>H NMR** (400 MHz, CDCl<sub>3</sub>) δ 7.37-7.34 (m, 4H), 7.31-7.27 (m, 6H), 7.25-7.20 (m, 5H), 5.87-5.78 (m, 1H), 5.49 (s, 2H), 5.21-5.09 (m, 3H), 4.50-4.42 (m, 2H), 4.04-3.91 (m, 2H), 3.55 (s, 4H), 3.09 (s, 2H).

**<sup>13</sup>C NMR** (75 MHz, CDCl<sub>3</sub>) δ 143.0, 139.5, 138.1, 134.5, 128.7, 128.3, 128.2, 127.8, 127.5, 126.8, 116.8, 115.6, 100.2, 67.3, 66.9, 58.2, 55.5.

**HRMS (ESI)** m/z: [M+H]<sup>+</sup> calcd for C<sub>28</sub>H<sub>32</sub>NO<sub>2</sub> 414.2428, found 414.2430.

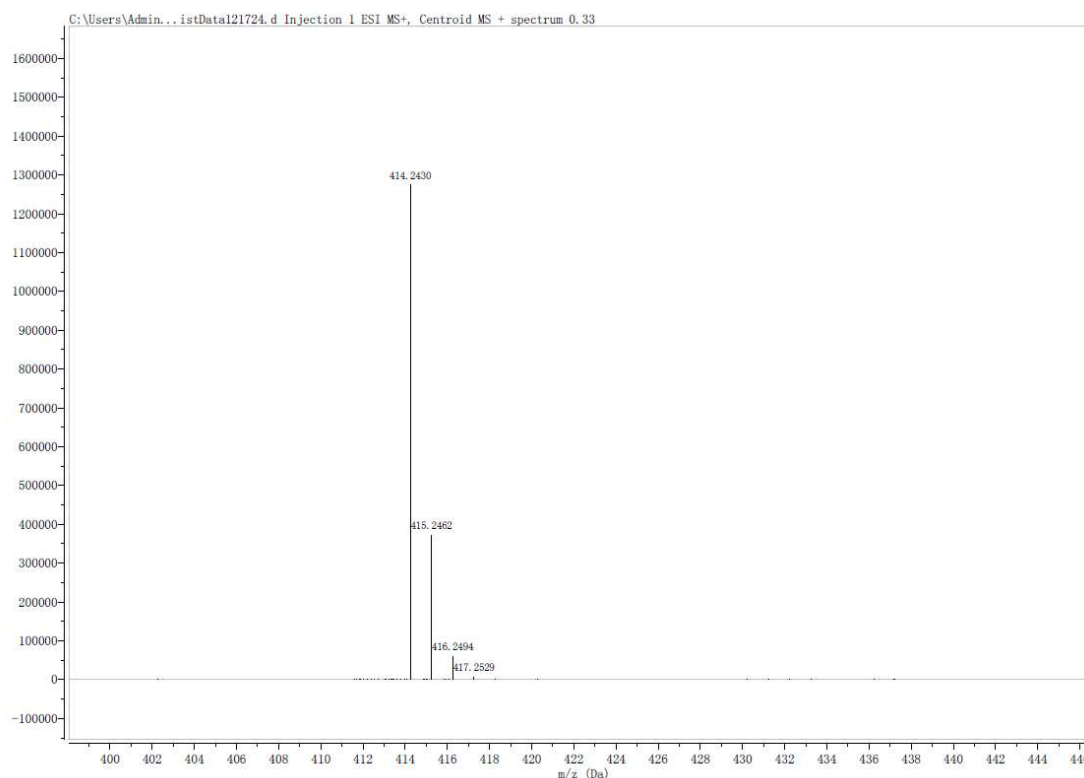

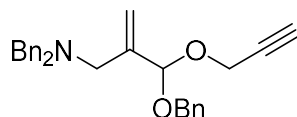

***N,N*-dibenzyl-2-((benzyloxy)(prop-2-yn-1-yloxy)methyl)prop-2-en-1-amine (5g):**

Prepared via **general procedure 3** from *N,N*-dibenzyl-1-(prop-2-yn-1-yloxy)methanamine (53.0 mg, 0.2 mmol, 1.0 equiv) and ((propa-1,2-dien-1-yloxy)methyl)benzene (43.8 mg, 0.3 mmol, 1.5 equiv) according to the general procedure in the presence of JohnPhosAu(MeCN)SbF<sub>6</sub> (7.7 mg, 0.01 mmol, 5 mol %), purified by silica gel column chromatography (petroleum ether/ EtOAc = 35:1 to 20:1) and obtained as yellow oil (59.3 mg, 72%).

**R<sub>f</sub>** (Petroleum ether/ EtOAc = 10:1) = 0.7.

**<sup>1</sup>H NMR** (400 MHz, CDCl<sub>3</sub>) δ 7.37-7.34 (m, 4H), 7.31-7.27 (m, 6H), 7.24-7.18 (m, 5H), 5.50 (s, 2H), 5.29 (s, 1H), 4.54 (d, *J* = 11.7 Hz, 1H), 4.44 (d, *J* = 11.7 Hz, 1H), 4.22-4.07 (m, 2H), 3.59-3.49 (m, 4H), 3.14-3.04 (m, 2H), 2.36 (s, 1H).

**<sup>13</sup>C NMR** (75 MHz, CDCl<sub>3</sub>) δ 142.5, 139.5, 137.8, 128.7, 128.4, 128.3, 127.8, 127.6, 126.9, 116.2, 99.7, 79.8, 74.2, 67.8, 58.1, 55.5, 53.1.

**HRMS (ESI)** *m/z*: [M+H]<sup>+</sup> calcd for C<sub>28</sub>H<sub>30</sub>NO<sub>2</sub> 412.2271, found 412.2274.

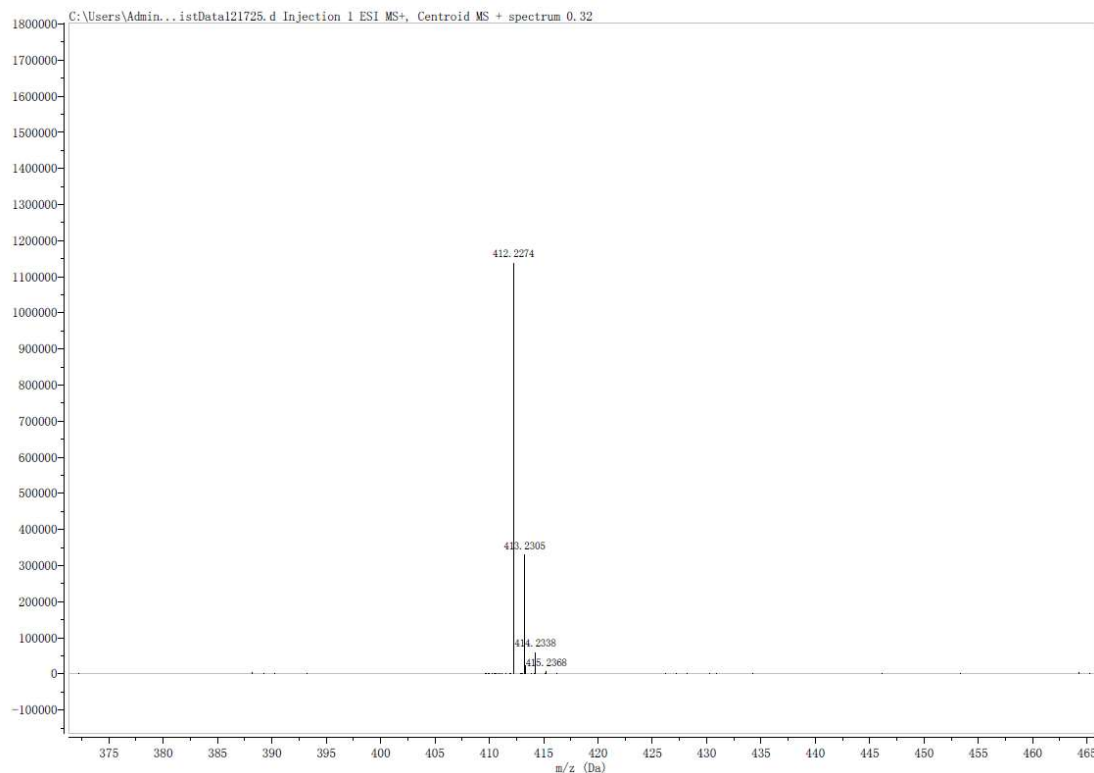

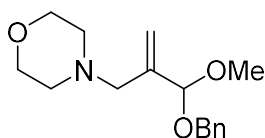

**4-(2-((benzyloxy)(methoxy)methyl)allyl)morpholine (5h):**

Prepared via **general procedure 3** from 4-(methoxymethyl)morpholine (26.2 mg, 0.2 mmol, 1.0 equiv) and ((propa-1,2-dien-1-yloxy)methyl)benzene (43.8 mg, 0.3 mmol, 1.5 equiv) according to the general procedure in the presence of CuCl<sub>2</sub> (4.5 mg, 0.02 mmol, 10 mol %), purified by silica gel column chromatography (petroleum ether/ MTBE = 5:1 to 1:1) and obtained as yellow oil (35.5 mg, 64%).

**R<sub>f</sub>** (Petroleum ether/ EtOAc = 5:1) = 0.4.

**<sup>1</sup>H NMR** (400 MHz, CDCl<sub>3</sub>) δ 7.42-7.24 (m, 5H), 5.45 (s, 1H), 5.28 (s, 1H), 5.00 (s, 1H), 4.60 (d, *J* = 12.0 Hz, 1H), 4.52 (d, *J* = 12.0 Hz, 1H), 3.72-3.62 (m, 4H), 3.32 (s, 3H), 2.96 (s, 2H), 2.46-2.34 (m, 4H).

**<sup>13</sup>C NMR** (75 MHz, CDCl<sub>3</sub>) δ 141.4, 138.3, 128.5, 127.8, 127.7, 116.2, 101.3, 67.6, 67.2, 60.5, 53.8, 53.1.

**HRMS (ESI) m/z:** [M+H]<sup>+</sup> calcd for C<sub>16</sub>H<sub>24</sub>NO<sub>3</sub> 278.1751, found 278.1753.

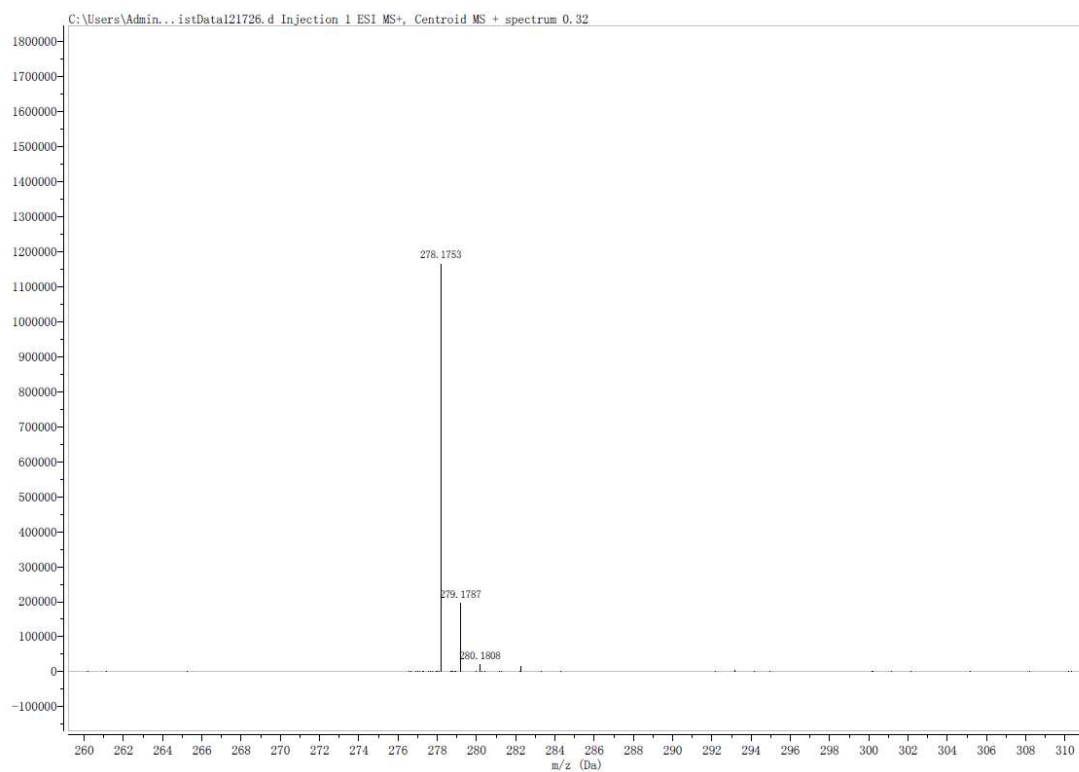

## General procedure for Scheme 5

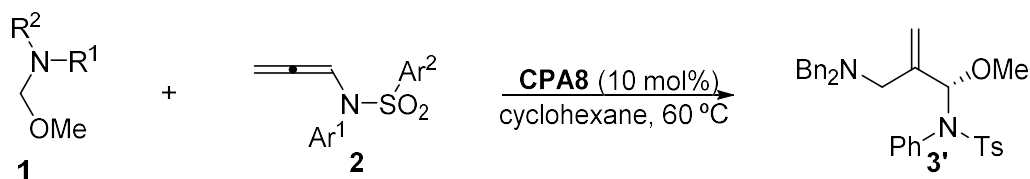

To a dry tube was added chiral phosphoric acid **8** (7.0 mg, 0.01 mmol, 0.1 equiv), then a solution of **1** (0.1 mmol, 1.0 equiv) and **2** (0.25 mmol, 2.5 equiv) in cyclohexane (5 mL) was added gradually under argon atmosphere. The reaction mixture was stirred at 60 °C in a heating block for 24 h. After cooling to room temperature, the reaction mixture was concentrated under vacuum, the crude residue was purified by silica gel column chromatography to give products **3'**.

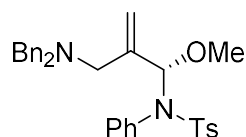

### *(S)*-N-(2-((dibenzylamino)methyl)-1-methoxyallyl)-4-methyl-N-phenylbenzenesulfonamide (**3a'**):

Prepared via **general procedure 5** N,N-dibenzyl-1-methoxymethanamine (24.1 mg, 0.1 mmol, 1.0 equiv) and 4-methyl-N-phenyl-N-(propa-1,2-dien-1-yl)benzenesulfonamide (71.3 mg, 0.25 mmol, 2.5 equiv) according to the general procedure in the presence of chiral phosphoric acid **4** (7.0 mg, 0.01 mmol, 10 mol %), purified by silica gel column chromatography (petroleum ether/ EtOAc = 25:1 to 10:1) and obtained as a white solid (43.2 mg, 82%), mp: 106-107 °C.

$R_f$  (Petroleum ether/ EtOAc = 10:1) = 0.5.

**HPLC** (IE, *n*-hexane/*i*-PrOH = 90/10, flow rate = 1.0 mL/min, I = 254 nm)  $t_R$  = 18.35 min (major), 19.99 min (minor), 92:8 er.  $[\alpha]_D^{26}$ : +54.0 (c: 0.10, CHCl<sub>3</sub>).

**<sup>1</sup>H NMR** (400 MHz, CDCl<sub>3</sub>)  $\delta$  7.47-7.42 (m, 4H), 7.42-7.33 (m, 6H), 7.31-7.24 (m, 2H), 7.18-7.10 (m, 3H), 7.04 (t,  $J$  = 7.7 Hz, 2H), 6.73 (d,  $J$  = 7.5 Hz, 2H), 6.10 (s, 1H), 5.15 (s, 1H), 4.99 (s, 1H), 3.74 (d,  $J$  = 13.7 Hz, 2H), 3.39 (s, 3H), 3.25 (d,  $J$  = 13.7 Hz, 2H), 3.08 (d,  $J$  = 14.4 Hz, 1H), 2.66 (d,  $J$  = 14.4 Hz, 1H), 2.38 (s, 3H).

**<sup>13</sup>C NMR** (75 MHz, CDCl<sub>3</sub>)  $\delta$  143.1, 140.6, 139.3, 137.0, 135.6, 131.3, 128.8, 128.7, 128.5, 128.2, 127.99, 127.96, 126.9, 117.2, 89.4, 58.4, 56.7, 56.3, 21.6.

**HRMS (ESI)**  $m/z$ :  $[M+H]^+$  calcd for C<sub>32</sub>H<sub>35</sub>N<sub>2</sub>O<sub>3</sub>S 527.2363, found 527.2365.

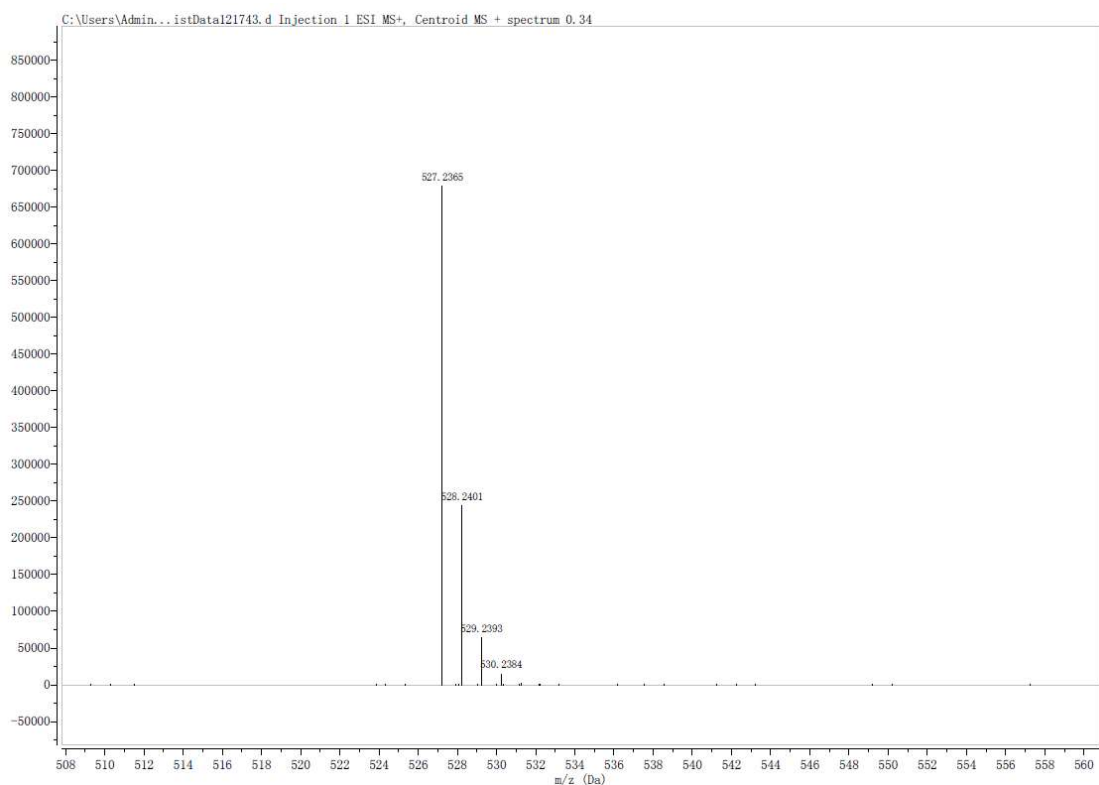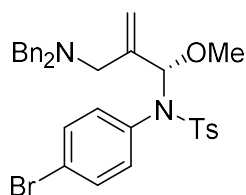

***(S)-N-(4-bromophenyl)-N-(2-((dibenzylamino)methyl)-1-methoxyallyl)-4-methylbenzenesulfonamide (3b')***:

Prepared via **general procedure 5** N,N-dibenzyl-1-methoxymethanamine (24.1 mg, 0.1 mmol, 1.0 equiv) and N-(4-bromophenyl)-4-methyl-N-(propa-1,2-dien-1-yl)benzenesulfonamide (91.0 mg, 0.25 mmol, 2.5 equiv) according to the general procedure in the presence of chiral phosphoric acid **4** (7.0 mg, 0.01 mmol, 10 mol %), purified by silica gel column chromatography (petroleum ether/ EtOAc = 35:1 to 15:1) and obtained as a white solid (44.8 mg, 74%), mp: 125-127 °C.

Prepared via **general procedure 5** N,N-dibenzyl-1-methoxymethanamine (0.72 g, 3 mmol, 1.0 equiv) and N-(4-bromophenyl)-4-methyl-N-(propa-1,2-dien-1-yl)benzenesulfonamide (2.73 g, 7.5 mmol, 2.5 equiv) according to the general procedure in the presence of chiral phosphoric acid **4** (210 mg, 0.3 mmol, 10 mol %) in DCM (75 ml), purified by silica gel column chromatography (petroleum ether/ EtOAc = 35:1 to 15:1) and obtained as a white solid (1.28 g, 70%).

**R<sub>f</sub>** (Petroleum ether/ EtOAc = 10:1) = 0.65.



**HPLC** (IE, *n*-hexane/*i*-PrOH = 90/10, flow rate = 1.0 mL/min, I = 254 nm)  $t_R$  = 13.39 min (major), 14.83 min (minor), 90:10 er.  $[\alpha]_D^{26}$ : +88.0 (c: 0.10, CHCl<sub>3</sub>).

**<sup>1</sup>H NMR** (400 MHz, CDCl<sub>3</sub>)  $\delta$  7.47-7.44 (m, 4H), 7.42-7.34 (m, 6H), 7.29-7.23 (m, 2H), 7.16-7.13 (m, 4H), 6.55 (d,  $J$  = 8.6 Hz, 2H), 6.09 (s, 1H), 5.17 (s, 1H), 5.00 (s, 1H), 3.75 (d,  $J$  = 13.7 Hz, 2H), 3.37 (s, 3H), 3.23 (d,  $J$  = 13.7 Hz, 2H), 3.02 (d,  $J$  = 14.3 Hz, 1H), 2.62 (d,  $J$  = 14.3 Hz, 1H), 2.38 (s, 3H).

**<sup>13</sup>C NMR** (75 MHz, CDCl<sub>3</sub>)  $\delta$  143.4, 140.3, 139.2, 136.6, 134.9, 132.8, 131.3, 129.0, 128.8, 128.6, 128.2, 127.0, 122.2, 117.7, 89.3, 58.5, 56.9, 56.3, 21.6.

**HRMS (ESI)**  $m/z$ :  $[M+H]^+$  calcd for C<sub>32</sub>H<sub>34</sub>BrN<sub>2</sub>O<sub>3</sub>S 605.1468, found 605.1469.

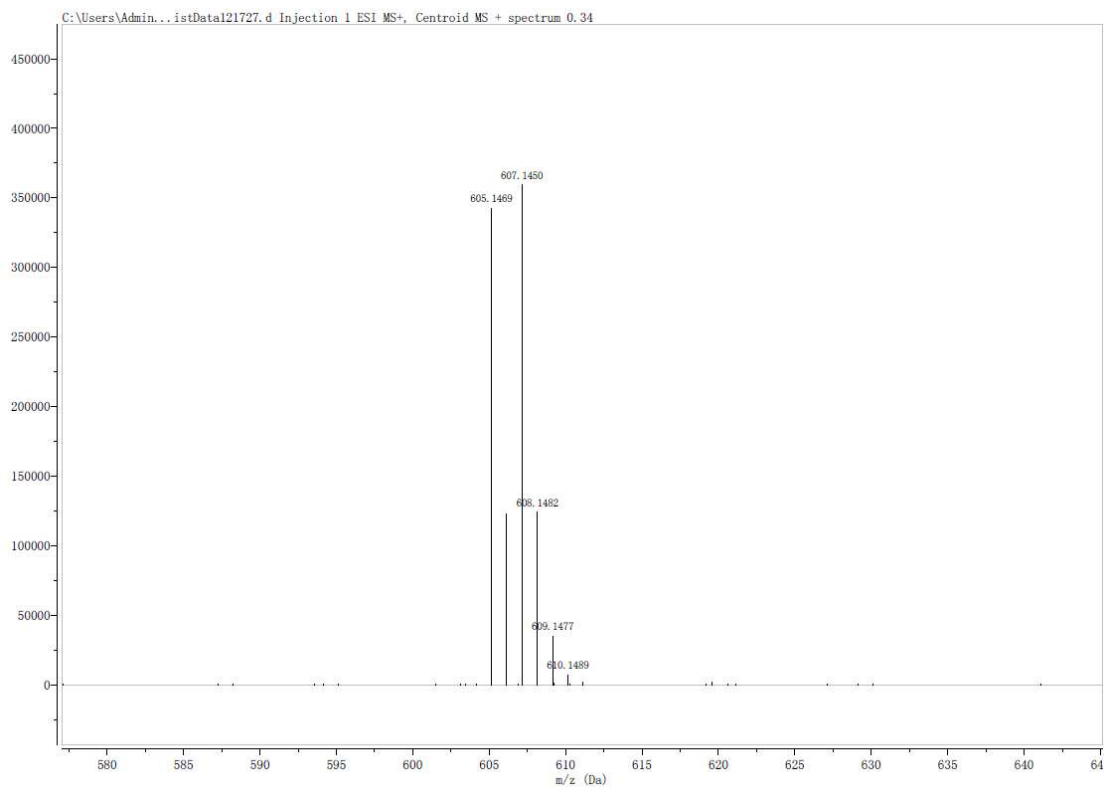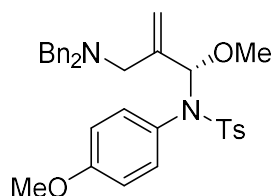

***(S)*-N-(2-((dibenzylamino)methyl)-1-methoxyallyl)-N-(4-methoxyphenyl)-4-methylbenzenesulfonamide (3c')**:

Prepared via **general procedure 5** N,N-dibenzyl-1-methoxymethanamine (24.1 mg, 0.1 mmol, 1.0 equiv) and N-(4-methoxyphenyl)-4-methyl-N-(propa-1,2-dien-1-yl)benzenesulfonamide (78.8 mg, 0.25 mmol, 2.5 equiv) according to the general procedure in the presence of chiral phosphoric acid **4** (7.0 mg, 0.01 mmol, 10 mol %), purified by silica gel column chromatography (petroleum ether/ EtOAc = 25:1 to 10:1) and obtained as a white solid (40.1 mg, 72%), mp: 105-106 °C.

**R<sub>f</sub>** (Petroleum ether/ EtOAc = 10:1) = 0.4.

**HPLC** (IE, *n*-hexane/*i*-PrOH = 90/10, flow rate = 1.0 mL/min, I = 254 nm) *t<sub>R</sub>* = 18.58 min (major), 19.94 min (minor), 90:10 er. **[α]<sub>D</sub><sup>26</sup>**: +62.0 (c: 0.10, CHCl<sub>3</sub>).

**<sup>1</sup>H NMR** (400 MHz, CDCl<sub>3</sub>) δ 7.47-7.44 (m, 4H), 7.42-7.34 (m, 6H), 7.26-7.22 (m, 2H), 7.13 (d, *J* = 8.1 Hz, 2H), 6.61 (d, *J* = 9.0 Hz, 1H), 6.54 (d, *J* = 9.0 Hz, 1H), 6.07 (s, 1H), 5.16 (s, 1H), 4.98 (s, 1H), 3.74 (d, *J* = 13.8 Hz, 2H), 3.70 (s, 3H), 3.38 (s, 3H), 3.26 (d, *J* = 13.8 Hz, 2H), 3.08 (d, *J* = 14.4 Hz, 1H), 2.68 (d, *J* = 14.4 Hz, 1H), 2.37 (s, 3H).

**<sup>13</sup>C NMR** (75 MHz, CDCl<sub>3</sub>) δ 159.1, 143.1, 140.7, 139.3, 137.0, 132.5, 128.9, 128.7, 128.5, 128.3, 128.0, 127.0, 117.1, 113.2, 89.3, 58.4, 56.7, 56.4, 55.2, 21.6.

**HRMS (ESI)** *m/z*: [M+H]<sup>+</sup> calcd for C<sub>33</sub>H<sub>37</sub>N<sub>2</sub>O<sub>4</sub>S 557.2469, found 557.2465.

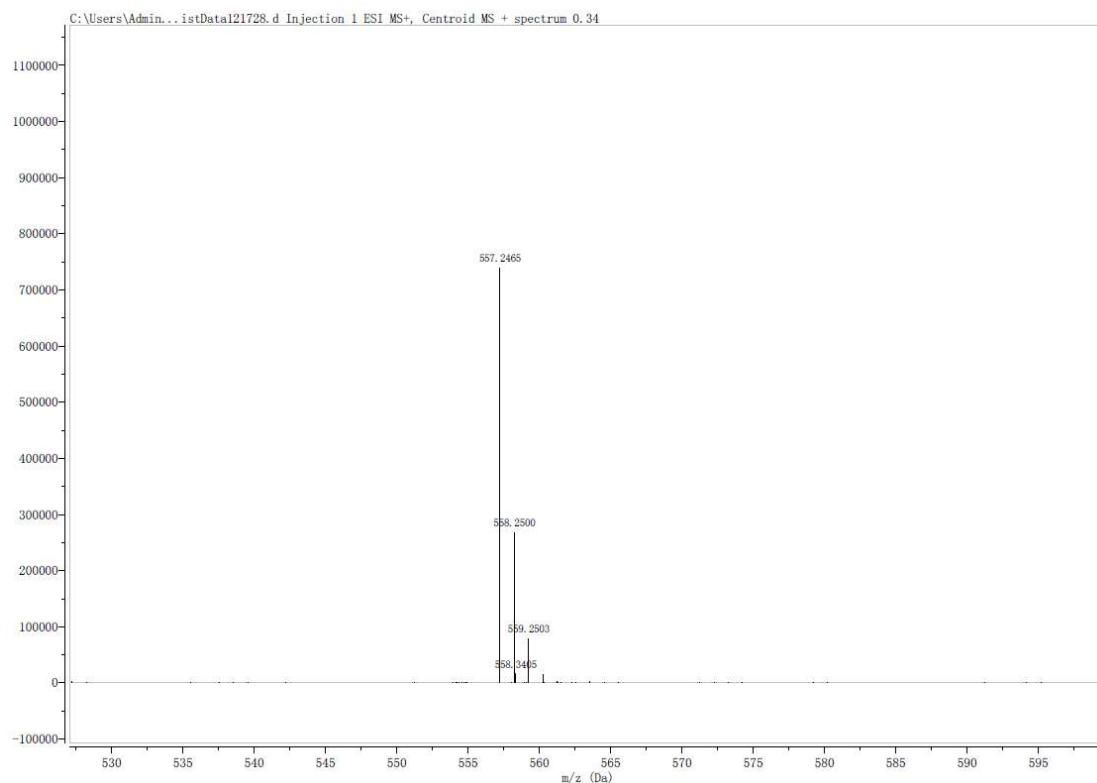

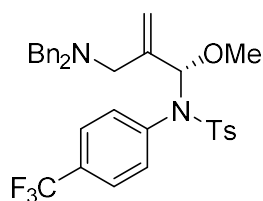

**(S)-N-(2-((dibenzylamino)methyl)-1-methoxyallyl)-4-methyl-N-(4-(trifluoromethyl)phenyl)benzenesulfonamide (3d')** :

Prepared via **general procedure 5** N,N-dibenzyl-1-methoxymethanamine (24.1 mg, 0.1 mmol, 1.0 equiv) and 4-methyl-N-(propa-1,2-dien-1-yl)-N-(4-(trifluoromethyl)phenyl)benzenesulfonamide (88.3 mg, 0.25 mmol, 2.5 equiv) according to the general procedure in the presence of chiral phosphoric acid **4** (7.0 mg, 0.01 mmol, 10 mol %), purified by silica gel column chromatography (petroleum ether/ EtOAc = 30:1 to 15:1) and obtained as a white solid (47.6 mg, 80%), mp: 131-132 °C.

**R<sub>f</sub>** (Petroleum ether/ EtOAc = 10:1) = 0.65.

**HPLC** (ID, *n*-hexane/*i*-PrOH = 90/10, flow rate = 1.0 mL/min, I = 254 nm) *t<sub>R</sub>* = 5.82 min (major), 7.25 min (minor), 87:13 er. **[α]<sub>D</sub><sup>26</sup>**: +48.0 (c: 0.10, CHCl<sub>3</sub>).

**<sup>1</sup>H NMR** (300 MHz, CDCl<sub>3</sub>) δ 7.48-7.44 (m, 4H), 7.40-7.35 (m, 6H), 7.31-7.25 (m, 4H), 7.15 (d, *J* = 8.2 Hz, 2H), 6.82 (d, *J* = 8.2 Hz, 2H), 6.13 (s, 1H), 5.17 (s, 1H), 5.03 (s, 1H), 3.76 (d, *J* = 13.7 Hz, 2H), 3.38 (s, 3H), 3.23 (d, *J* = 13.7 Hz, 2H), 3.01 (d, *J* = 14.3 Hz, 1H), 2.61 (d, *J* = 14.3 Hz, 1H), 2.38 (s, 3H).

**<sup>13</sup>C NMR** (75 MHz, CDCl<sub>3</sub>) δ 143.6, 140.2, 139.3 (q, *J* = 1.3 Hz), 139.2, 136.6, 131.3, 129.8 (q, *J* = 32.6 Hz), 129.0, 128.8, 128.6, 128.1, 127.1, 125.1 (q, *J* = 3.7 Hz), 123.9 (q, *J* = 272.3 Hz), 117.9, 89.4, 58.5, 57.0, 56.3, 21.6.

**<sup>19</sup>F NMR** (282 MHz, CDCl<sub>3</sub>) δ -62.5.

**HRMS (ESI)** *m/z*: [M+H]<sup>+</sup> calcd for C<sub>33</sub>H<sub>34</sub>F<sub>3</sub>N<sub>2</sub>O<sub>3</sub>S 595.2237, found 595.2238.

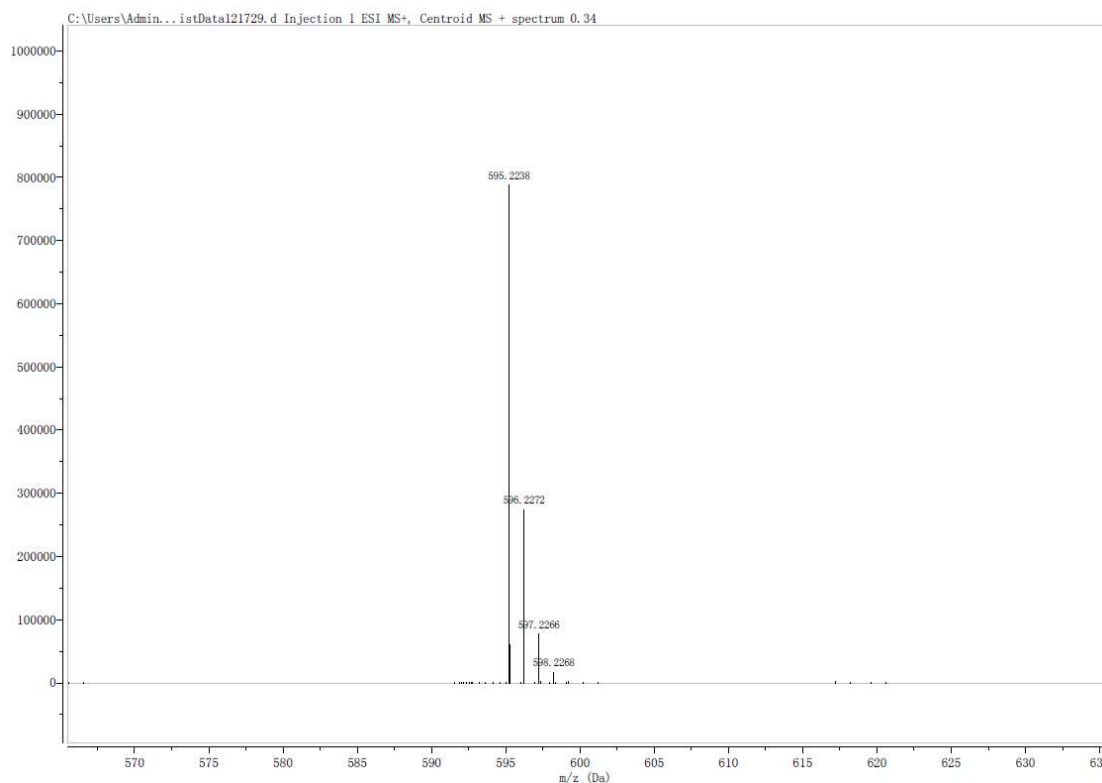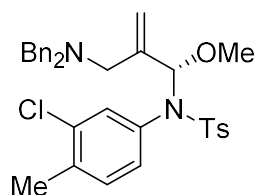

***(S)*-N-(3-chloro-4-methylphenyl)-N-(2-((dibenzylamino)methyl)-1-methoxyallyl)-4-methylbenzenesulfonamide (3e')**:

Prepared via **general procedure 5** N,N-dibenzyl-1-methoxymethanamine (24.1 mg, 0.1 mmol, 1.0 equiv) and N-(3-chloro-4-methylphenyl)-4-methyl-N-(propa-1,2-dien-1-yl)-benzene sulfonamide (83.5 mg, 0.25 mmol, 2.5 equiv) according to the general procedure in the presence of chiral phosphoric acid **4** (7.0 mg, 0.01 mmol, 10 mol %), purified by silica gel column chromatography (petroleum ether/ EtOAc = 30:1 to 15:1) and obtained as colorless oil (42.6 mg, 74%).

**R<sub>f</sub>** (Petroleum ether/ EtOAc = 10:1) = 0.65.

**HPLC** (ID, *n*-hexane/*i*-PrOH = 80/20, flow rate = 1.0 mL/min, I = 254 nm) *t<sub>R</sub>* = 6.95 min (major), 9.38 min (minor), 91:9 er. **[α]<sub>D</sub><sup>26</sup>**: +156.0 (c: 0.10, CHCl<sub>3</sub>).

**<sup>1</sup>H NMR** (300 MHz, CDCl<sub>3</sub>) δ 7.48-7.44 (m, 4H), 7.42-7.35 (m, 6H), 7.29-7.24 (m, 2H), 7.15 (d, *J* = 8.1 Hz, 2H), 6.87 (d, *J* = 8.2 Hz, 1H), 6.76 (d, *J* = 2.1 Hz, 1H), 6.50 (dd, *J* = 8.2, 2.1 Hz, 1H), 6.08

(s, 1H), 5.16 (s, 1H), 5.02 (s, 1H), 3.77 (d,  $J = 13.7$  Hz, 2H), 3.36 (s, 3H), 3.20 (d,  $J = 13.7$  Hz, 2H), 3.06 (d,  $J = 14.2$  Hz, 1H), 2.62 (d,  $J = 14.2$  Hz, 1H), 2.37 (s, 3H), 2.24 (s, 3H).

$^{13}\text{C}$  NMR (100 MHz,  $\text{CDCl}_3$ )  $\delta$  143.4, 140.4, 139.2, 136.8, 136.0, 134.4, 133.3, 131.5, 130.1, 129.4, 128.9, 128.8, 128.6, 128.2, 127.1, 117.7, 89.3, 58.5, 56.9, 56.4, 21.6, 19.9.

**HRMS (ESI)  $m/z$ :  $[\text{M}+\text{H}]^+$  calcd for  $\text{C}_{33}\text{H}_{36}\text{ClN}_2\text{O}_3\text{S}$  575.2130, found 575.2134.**

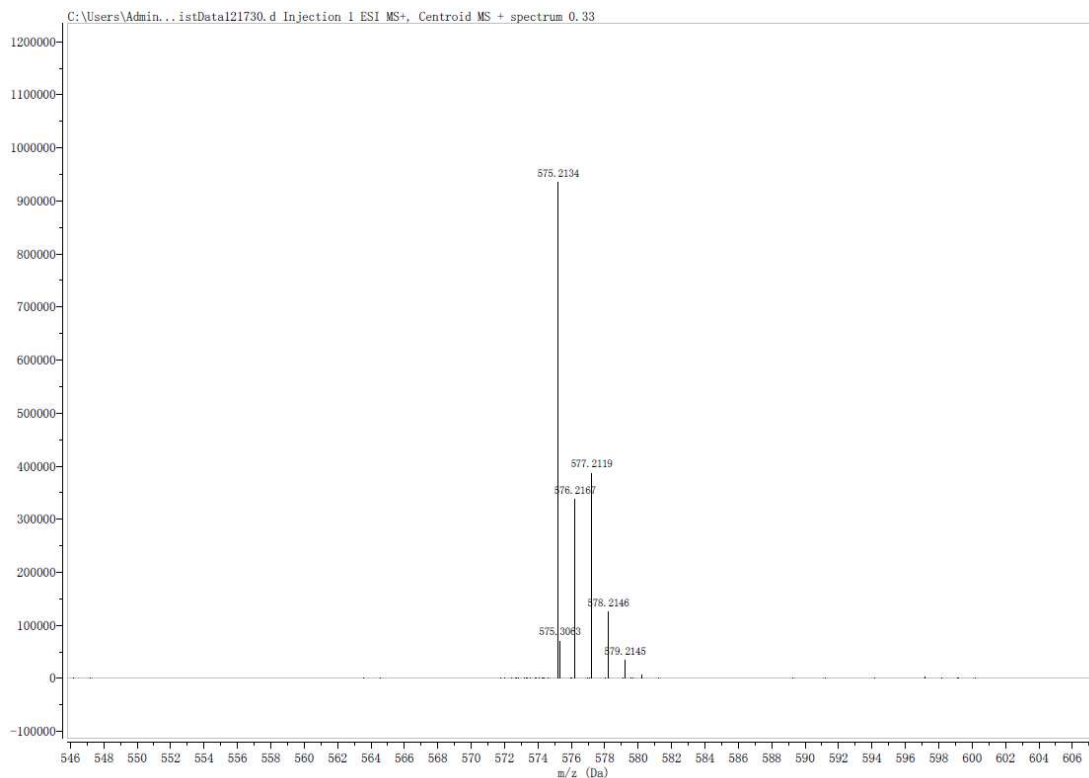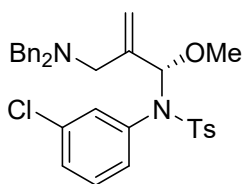

***(S)*-N-(3-chlorophenyl)-N-(2-((dibenzylamino)methyl)-1-methoxyallyl)-4-methylbenzenesulfonamide (**3f**):**

Prepared via **general procedure 5** N,N-dibenzyl-1-methoxymethanamine (24.1 mg, 0.1 mmol, 1.0 equiv) and N-(3-chlorophenyl)-4-methyl-N-(propa-1,2-dien-1-yl)benzenesulfonamide (79.9 mg, 0.25 mmol, 2.5 equiv) according to the general procedure in the presence of chiral phosphoric acid **4** (7.0 mg, 0.01 mmol, 10 mol %), purified by silica gel column chromatography (petroleum ether/EtOAc = 30:1 to 12:1) and obtained as colorless oil (39.8 mg, 71%).

**R<sub>f</sub>** (Petroleum ether/ EtOAc = 10:1) = 0.5.

**HPLC** (ID, *n*-hexane/*i*-PrOH = 80/20, flow rate = 1.0 mL/min, I = 254 nm)  $t_R$  = 7.58 min (major), 9.80 min (minor), 92:8 er.  $[\alpha]_D^{26}$ : +42.0 (c: 0.10, CHCl<sub>3</sub>).

**<sup>1</sup>H NMR** (400 MHz, CDCl<sub>3</sub>)  $\delta$  7.54-7.51 (m, 4H), 7.45 (d,  $J$  = 7.5 Hz, 6H), 7.34 (t,  $J$  = 7.3 Hz, 2H), 7.22-7.17 (m, 3H), 7.01 (t,  $J$  = 8.0 Hz, 1H), 6.83-6.81 (m, 1H), 6.67 (d,  $J$  = 8.0 Hz, 1H), 6.17 (s, 1H), 5.22 (s, 1H), 5.08 (s, 1H), 3.84 (d,  $J$  = 13.7 Hz, 2H), 3.42 (s, 3H), 3.25 (d,  $J$  = 13.7 Hz, 2H), 3.11 (d,  $J$  = 14.2 Hz, 1H), 2.67 (d,  $J$  = 14.2 Hz, 1H), 2.43 (s, 3H).

**<sup>13</sup>C NMR** (75 MHz, CDCl<sub>3</sub>)  $\delta$  143.5, 140.3, 139.2, 137.1, 136.6, 133.3, 131.3, 129.4, 129.0, 128.9, 128.8, 128.6, 128.3, 128.2, 127.1, 117.8, 89.3, 58.5, 56.9, 56.4, 21.6.

**HRMS (ESI)**  $m/z$ :  $[M+H]^+$  calcd for C<sub>32</sub>H<sub>34</sub>ClN<sub>2</sub>O<sub>3</sub>S 561.1973, found 561.1973.

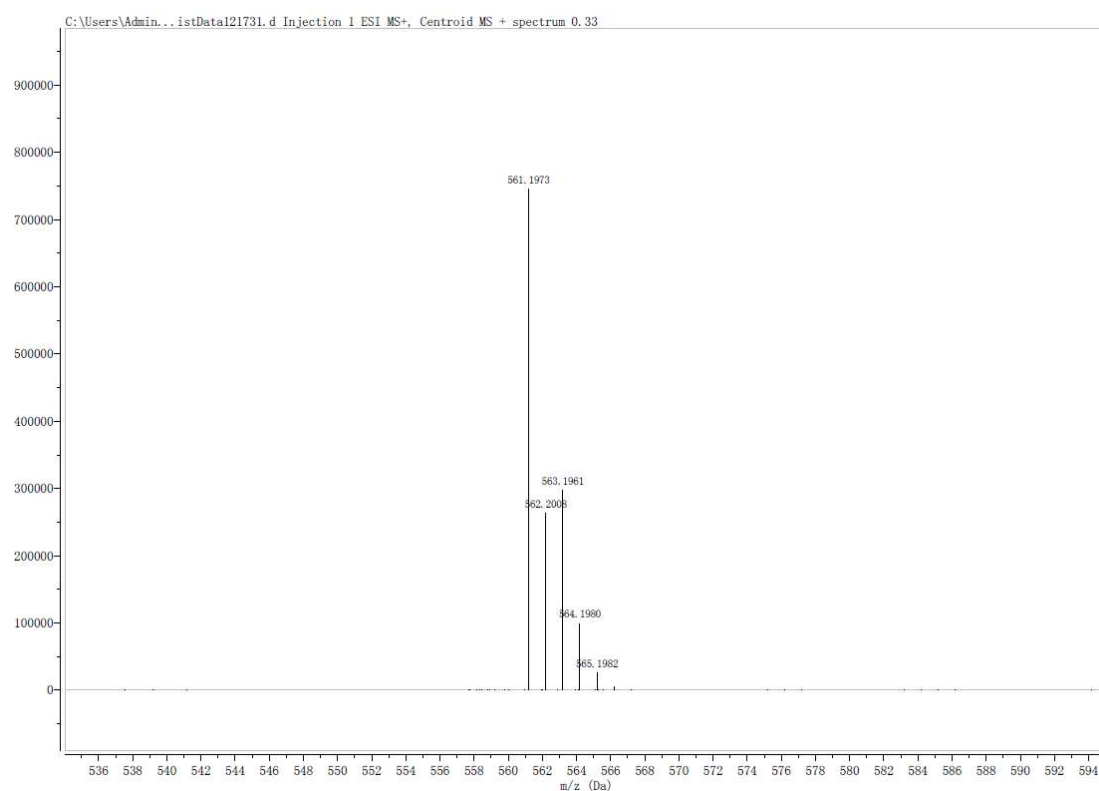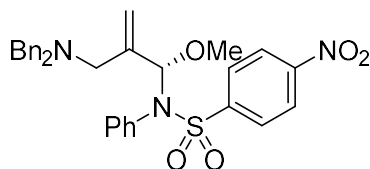

**(S)-N-(2-((dibenzylamino)methyl)-1-methoxyallyl)-4-nitro-N-phenylbenzenesulfonamide (3g')**:

Prepared via **general procedure 5** N,N-dibenzyl-1-methoxymethanamine (24.1 mg, 0.1 mmol, 1.0 equiv) and 4-nitro-N-phenyl-N-(propa-1,2-dien-1-yl)benzenesulfonamide (79.0 mg, 0.25 mmol, 2.5 equiv) according to the general procedure in the presence of chiral phosphoric acid **4** (7.0 mg,

0.01 mmol, 10 mol %), purified by silica gel column chromatography (petroleum ether/ EtOAc = 25:1 to 10:1) and obtained as a white solid (45.7 mg, 82%), mp: 144-145 °C.

$R_f$  (Petroleum ether/ EtOAc = 10:1) = 0.4.

**HPLC** (IE, *n*-hexane/*i*-PrOH = 80/20, flow rate = 1.0 mL/min, I = 254 nm)  $t_R$  = 7.39 min (minor), 8.06 min (major), 91:9 er.  $[\alpha]_D^{26}$ : +78.0 (c: 0.10, CHCl<sub>3</sub>).

**<sup>1</sup>H NMR** (400 MHz, CDCl<sub>3</sub>)  $\delta$  8.19 (d,  $J$  = 8.8 Hz, 2H), 7.66 (d,  $J$  = 8.8 Hz, 2H), 7.49-7.46 (m, 4H), 7.40 (t,  $J$  = 7.5 Hz, 4H), 7.30 (t,  $J$  = 7.4 Hz, 2H), 7.19 (t,  $J$  = 7.4 Hz, 1H), 7.06 (t,  $J$  = 7.8 Hz, 2H), 6.65 (d,  $J$  = 7.8 Hz, 2H), 6.18 (s, 1H), 5.14 (s, 1H), 5.01 (s, 1H), 3.82 (d,  $J$  = 13.7 Hz, 2H), 3.37 (s, 3H), 3.16 (d,  $J$  = 13.7 Hz, 2H), 3.09 (d,  $J$  = 14.0 Hz, 1H), 2.58 (d,  $J$  = 14.0 Hz, 1H).

**<sup>13</sup>C NMR** (75 MHz, CDCl<sub>3</sub>)  $\delta$  149.9, 145.4, 139.7, 139.1, 135.0, 130.9, 129.5, 128.8, 128.6, 128.5, 128.3, 127.1, 123.3, 118.5, 89.5, 58.5, 56.9, 56.4.

**HRMS (ESI)**  $m/z$ :  $[M+H]^+$  calcd for C<sub>31</sub>H<sub>32</sub>N<sub>3</sub>O<sub>5</sub>S 558.2057, found 558.2054.

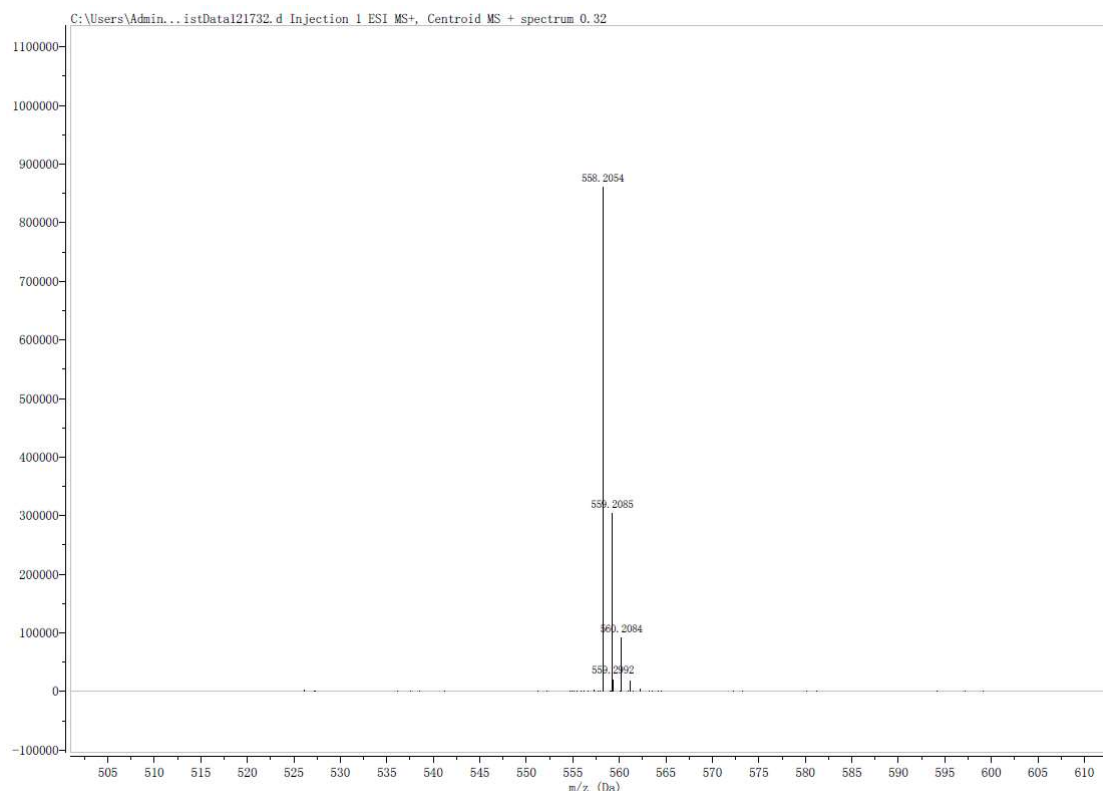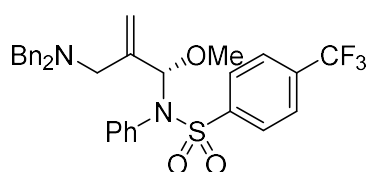

***(S)*-N-(2-((dibenzylamino)methyl)-1-methoxyallyl)-N-phenyl-4-(trifluoromethyl)-benzenesulfonamide (3h')**:

Prepared via **general procedure 5** N,N-dibenzyl-1-methoxymethanamine (24.1 mg, 0.1 mmol, 1.0 equiv) and N-phenyl-N-(propa-1,2-dien-1-yl)-4-(trifluoromethyl)benzenesulfonamide (84.8 mg, 0.25 mmol, 2.5 equiv) according to the general procedure in the presence of chiral phosphoric acid **4** (7.0 mg, 0.01 mmol, 10 mol %), purified by silica gel column chromatography (petroleum ether/EtOAc = 30:1 to 15:1) and obtained as a white solid (45.3 mg, 78%), mp: 112-113 °C.

**R<sub>f</sub>** (Petroleum ether/ EtOAc = 10:1) = 0.65.

**HPLC** (ID, *n*-hexane/*i*-PrOH = 90/10, flow rate = 1.0 mL/min, I = 254 nm) *t<sub>R</sub>* = 5.14 min (major), 5.96 min (minor), 91:9 er. **[α]<sub>D</sub><sup>26</sup>**: +40.0 (c: 0.10, CHCl<sub>3</sub>).

**<sup>1</sup>H NMR** (300 MHz, CDCl<sub>3</sub>) δ 7.63-7.59 (m, 4H), 7.49-7.45 (m, 4H), 7.42-7.37 (m, 4H), 7.31-7.26 (m, 2H), 7.19-7.15 (m, 1H), 7.09-7.02 (m, 2H), 6.69-6.65 (m, 2H), 6.17 (s, 1H), 5.14 (s, 1H), 5.01 (s, 1H), 3.80 (d, *J* = 13.7 Hz, 2H), 3.38 (s, 3H), 3.18 (d, *J* = 13.7 Hz, 2H), 3.09 (d, *J* = 14.1 Hz, 1H), 2.60 (d, *J* = 14.1 Hz, 1H).

**<sup>13</sup>C NMR** (75 MHz, CDCl<sub>3</sub>) δ 143.3 (q, *J* = 1.2 Hz), 140.0, 139.2, 135.2, 134.0 (q, *J* = 32.9 Hz), 131.1, 128.8, 128.6, 128.4, 128.3, 127.1, 125.3 (q, *J* = 3.5 Hz), 123.4 (q, *J* = 272.7 Hz), 118.2, 89.4, 58.5, 56.8, 56.4.

**<sup>19</sup>F NMR** (282 MHz, CDCl<sub>3</sub>) δ -63.0.

**HRMS (ESI)** *m/z*: [M+H]<sup>+</sup> calcd for C<sub>32</sub>H<sub>32</sub>F<sub>3</sub>N<sub>2</sub>O<sub>3</sub>S 581.2080, found 581.2084.



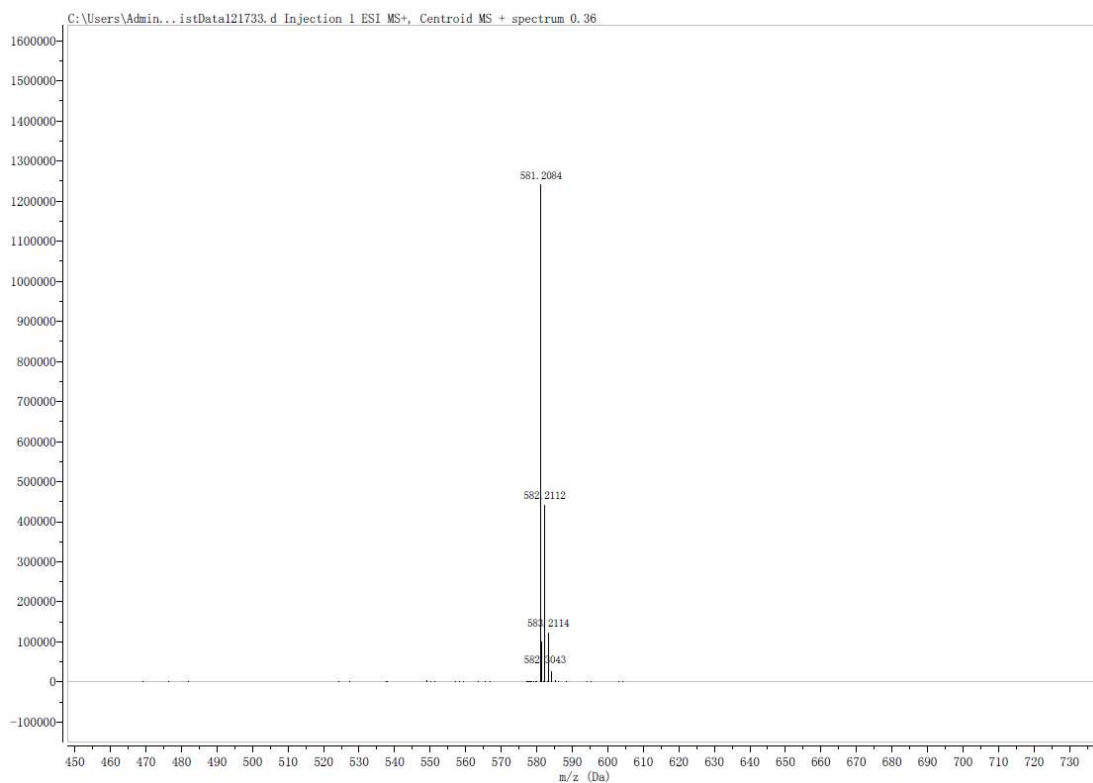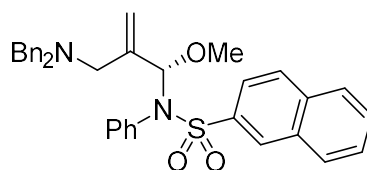

**(S)-N-(2-((dibenzylamino)methyl)-1-methoxyallyl)-N-phenylnaphthalene-2-sulfonamide (3i')**:

Prepared via **general procedure 5** N,N-dibenzyl-1-methoxymethanamine (24.1 mg, 0.1 mmol, 1.0 equiv) and N-phenyl-N-(propa-1,2-dien-1-yl)naphthalene-2-sulfonamide (80.3 mg, 0.25 mmol, 2.5 equiv) according to the general procedure in the presence of chiral phosphoric acid **4** (7.0 mg, 0.01 mmol, 10 mol %), purified by silica gel column chromatography (petroleum ether/ EtOAc = 25:1 to 12:1) and obtained as a white solid (47.8 mg, 85%), mp: 143-144 °C.

**R<sub>f</sub>** (Petroleum ether/ EtOAc = 10:1) = 0.45.

**HPLC** (ID, *n*-hexane/*i*-PrOH = 90/10, flow rate = 1.0 mL/min, I = 254 nm) *t<sub>R</sub>* = 11.52 min (major), 13.10 min (minor), 84:16 er. **[α]<sub>D</sub><sup>26</sup>**: +60.0 (c: 0.10, CHCl<sub>3</sub>).

**<sup>1</sup>H NMR** (400 MHz, CDCl<sub>3</sub>) δ 8.05 (s, 1H), 7.86 (d, *J* = 8.1 Hz, 1H), 7.83-7.74 (m, 2H), 7.64-7.50 (m, 3H), 7.46-7.44 (m, 4H), 7.37 (t, *J* = 7.5 Hz, 4H), 7.29-7.22 (m, 2H), 7.15 (t, *J* = 7.4 Hz, 1H), 7.01 (t, *J* = 7.8 Hz, 2H), 6.70 (d, *J* = 7.9 Hz, 2H), 6.18 (s, 1H), 5.15 (s, 1H), 4.97 (s, 1H), 3.74 (d, *J*

= 13.7 Hz, 2H), 3.42 (s, 3H), 3.25 (d,  $J = 13.7$  Hz, 2H), 3.11 (d,  $J = 14.3$  Hz, 1H), 2.66 (d,  $J = 14.4$  Hz, 1H).

$^{13}\text{C}$  NMR (75 MHz,  $\text{CDCl}_3$ )  $\delta$  140.5, 139.3, 136.9, 135.5, 134.8, 131.9, 131.4, 129.6, 129.3, 128.8, 128.6, 128.5, 128.2, 128.14, 128.10, 127.8, 127.2, 127.0, 123.7, 117.4, 89.4, 58.4, 56.7, 56.4.

HRMS (ESI)  $m/z$ :  $[\text{M}+\text{H}]^+$  calcd for  $\text{C}_{35}\text{H}_{35}\text{N}_2\text{O}_3\text{S}$  563.2363, found 563.2360.

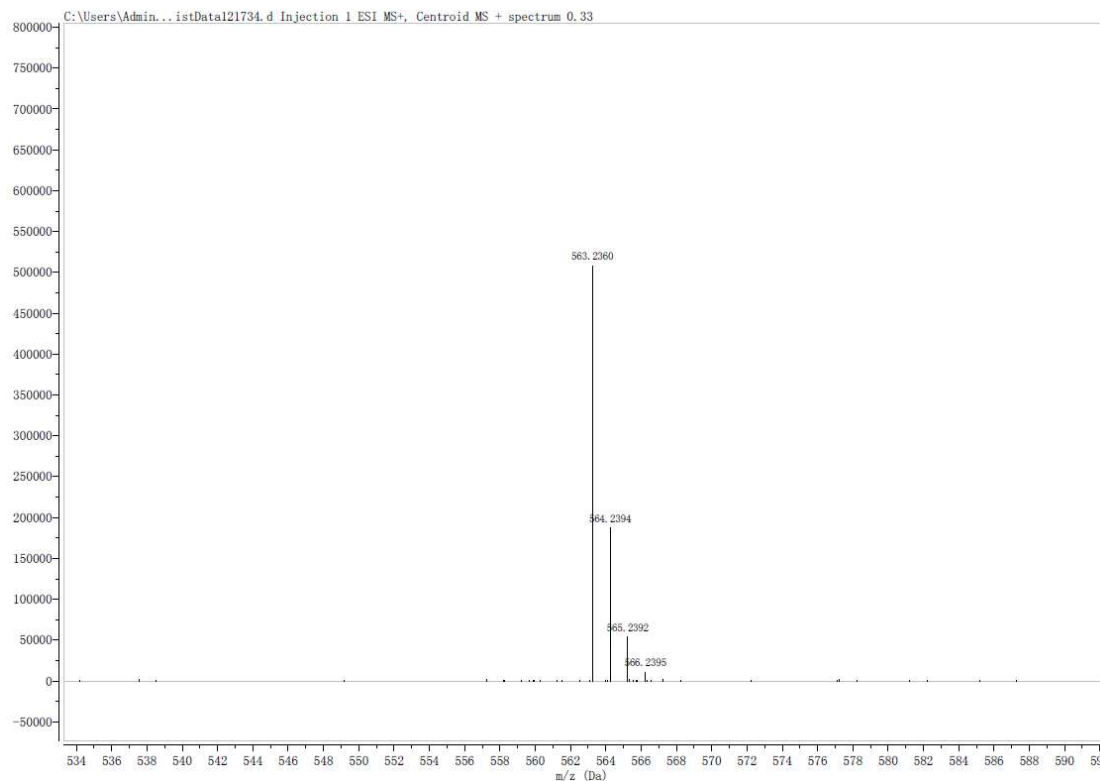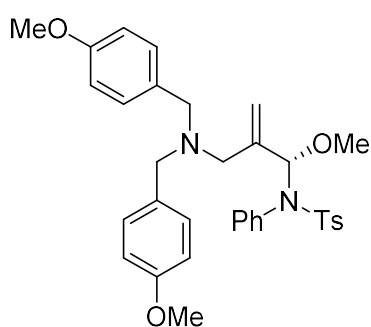

*(S)*-*N*-(2-((bis(4-methoxybenzyl)amino)methyl)-1-methoxyallyl)-4-methyl-*N*-phenylbenzenesulfonamide (**3j'**):

Prepared via **general procedure 5** 1-methoxy-*N,N*-bis(4-methoxybenzyl)methanamine (30.1 mg, 0.1 mmol, 1.0 equiv) and 4-methyl-*N*-phenyl-*N*-(propa-1,2-dien-1-yl)benzenesulfonamide (71.3 mg, 0.25 mmol, 2.5 equiv) according to the general procedure in the presence of chiral

phosphoric acid **4** (7.0 mg, 0.01 mmol, 10 mol %), purified by silica gel column chromatography (petroleum ether/ EtOAc = 20:1 to 9:1) and obtained as colorless oil (48.1 mg, 82%).

$R_f$  (Petroleum ether/ EtOAc = 10:1) = 0.25.

**HPLC** (ID, *n*-hexane/*i*-PrOH = 90/10, flow rate = 1.0 mL/min, I = 254 nm)  $t_R$  = 8.17 min (minor), 13.62 min (major), 91:9 er.  $[\alpha]_D^{26}$ : +58.0 (c: 0.10, CHCl<sub>3</sub>).

**<sup>1</sup>H NMR** (300 MHz, CDCl<sub>3</sub>)  $\delta$  7.40 (d,  $J$  = 8.3 Hz, 2H), 7.34 (d,  $J$  = 8.7 Hz, 4H), 7.16-7.12 (m, 3H), 7.08-7.03 (m, 2H), 6.91 (d,  $J$  = 8.7 Hz, 4H), 6.78-6.73 (m, 2H), 6.08 (s, 1H), 5.12 (s, 1H), 4.97 (s, 1H), 3.82 (s, 6H), 3.65 (d,  $J$  = 13.5 Hz, 2H), 3.40 (s, 3H), 3.18 (d,  $J$  = 13.5 Hz, 2H), 3.06 (d,  $J$  = 14.3 Hz, 1H), 2.63 (d,  $J$  = 14.3 Hz, 1H), 2.39 (s, 3H).

**<sup>13</sup>C NMR** (75 MHz, CDCl<sub>3</sub>)  $\delta$  158.6, 143.1, 140.7, 137.0, 135.6, 131.4, 131.3, 129.8, 128.8, 128.6, 128.2, 128.0, 117.1, 113.9, 89.3, 57.4, 56.7, 56.1, 55.3, 21.6.

**HRMS (ESI)**  $m/z$ :  $[M+H]^+$  calcd for C<sub>34</sub>H<sub>39</sub>N<sub>2</sub>O<sub>5</sub>S 587.2574, found 587.2575.

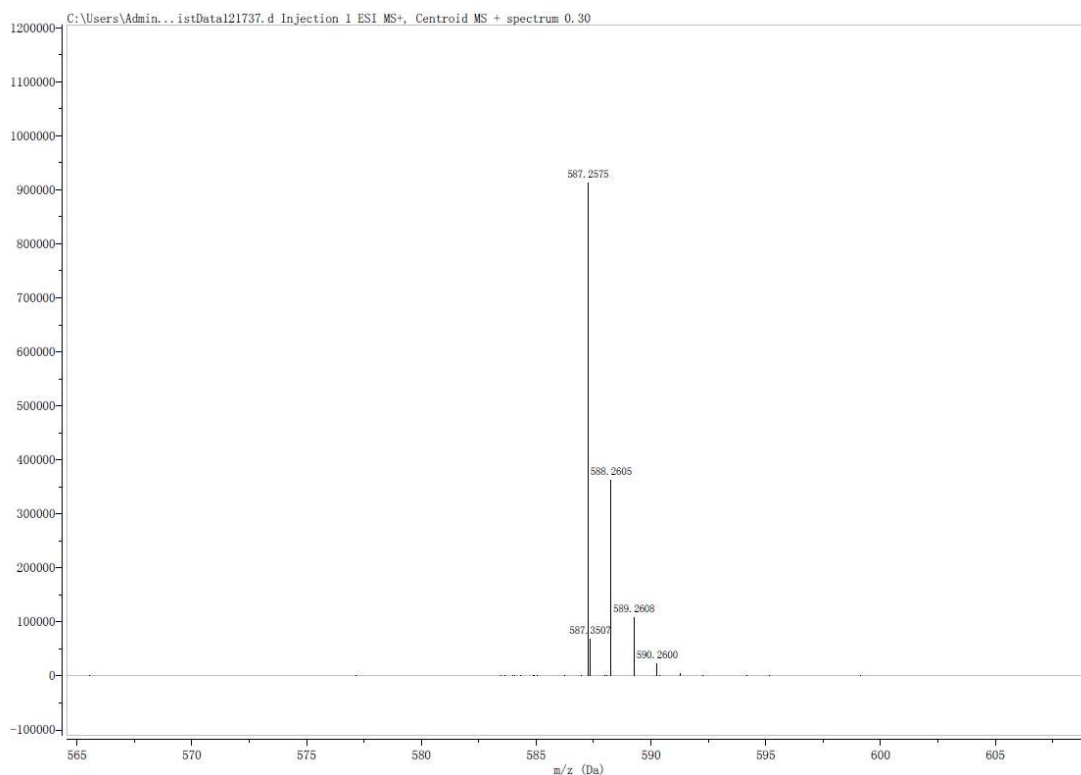

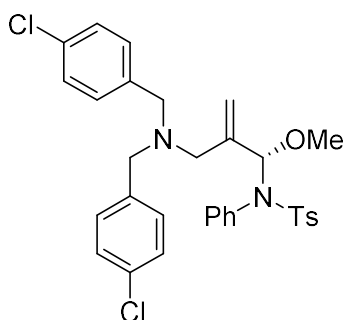

***(S)*-N-(2-((bis(4-chlorobenzyl)amino)methyl)-1-methoxyallyl)-4-methyl-N-phenylbenzenesulfonamide (3k')**:

Prepared via **general procedure 5** N,N-bis(4-chlorobenzyl)-1-methoxymethanamine (31.0 mg, 0.1 mmol, 1.0 equiv) and 4-methyl-N-phenyl-N-(propa-1,2-dien-1-yl)benzenesulfonamide (71.3 mg, 0.25 mmol, 2.5 equiv) according to the general procedure in the presence of chiral phosphoric acid **4** (7.0 mg, 0.01 mmol, 10 mol %), purified by silica gel column chromatography (petroleum ether/ EtOAc = 35:1 to 15:1) and obtained as a white solid (46.5 mg, 78%), mp: 86-87 °C.

**R<sub>f</sub>** (Petroleum ether/ EtOAc = 10:1) = 0.45.

**HPLC** (IE, *n*-hexane/*i*-PrOH = 80/20, flow rate = 2.0 mL/min, I = 215 nm) *t<sub>R</sub>* = 13.14 min (minor), 17.94 min (major), 94:6 er. **[α]<sub>D</sub><sup>26</sup>**: +24.0 (c: 0.10, CHCl<sub>3</sub>).

**<sup>1</sup>H NMR** (400 MHz, CDCl<sub>3</sub>) δ 7.40-7.38 (m, 2H), 7.37-7.32 (m, 8H), 7.16 (t, *J* = 7.5 Hz, 3H), 7.07 (t, *J* = 7.7 Hz, 2H), 6.77 (d, *J* = 7.7 Hz, 2H), 6.06 (s, 1H), 5.14 (s, 1H), 5.01 (s, 1H), 3.65 (d, *J* = 13.9 Hz, 2H), 3.38 (s, 3H), 3.23 (d, *J* = 13.9 Hz, 2H), 3.05 (d, *J* = 14.4 Hz, 1H), 2.66 (d, *J* = 14.4 Hz, 1H), 2.39 (s, 3H).

**<sup>13</sup>C NMR** (75 MHz, CDCl<sub>3</sub>) δ 143.3, 140.3, 137.5, 136.7, 135.5, 132.7, 131.2, 129.9, 128.9, 128.7, 128.2, 128.1, 117.4, 89.3, 57.6, 56.8, 56.2, 21.6.

**HRMS (ESI)** *m/z*: [M+H]<sup>+</sup> calcd for C<sub>32</sub>H<sub>33</sub>Cl<sub>2</sub>N<sub>2</sub>O<sub>3</sub>S 595.1583, found 595.1582.

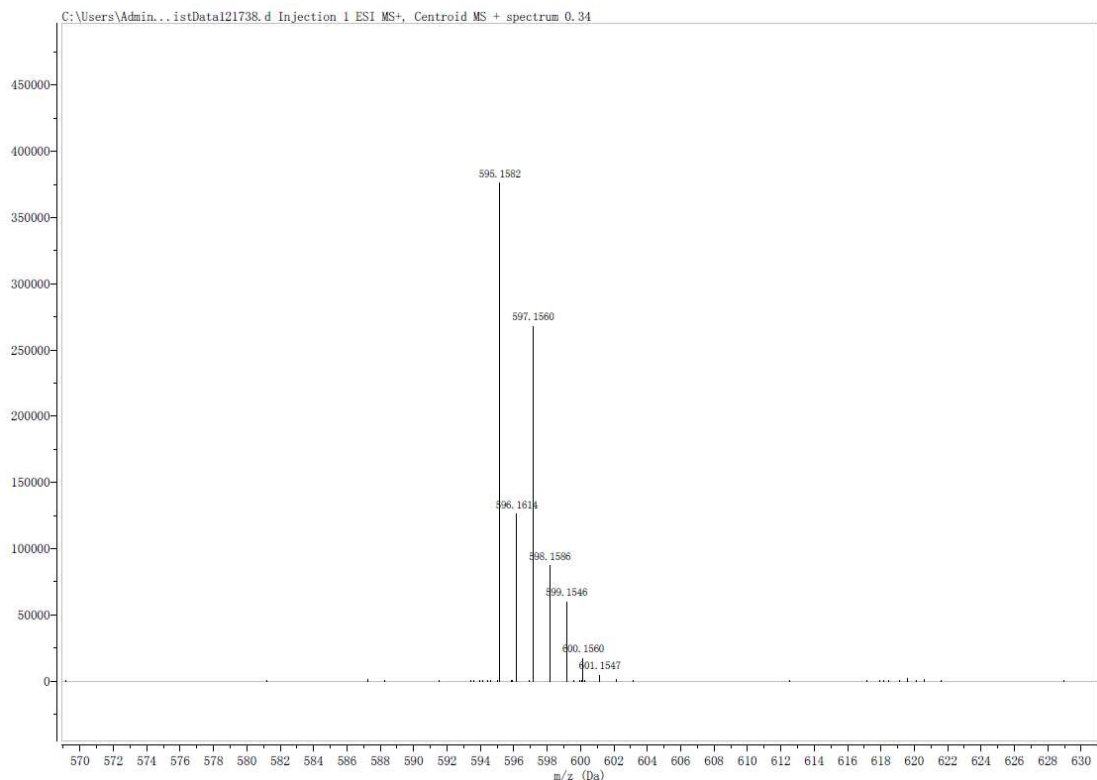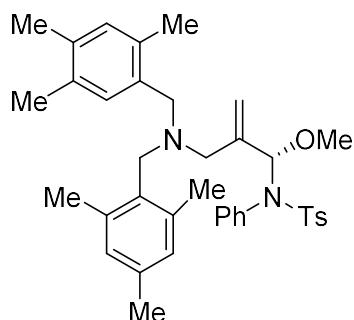

***(S)*-N-(2-((bis(2,4,6-trimethylbenzyl)amino)methyl)-1-methoxyallyl)-4-methyl-N-phenylbenzenesulfonamide (3l'):**

Prepared via **general procedure 5** 1-mesityl-N-(methoxymethyl)-N-(2,4,6-trimethylbenzyl)methanamine (32.5 mg, 0.1 mmol, 1.0 equiv) and 4-methyl-N-phenyl-N-(propa-1,2-dien-1-yl)benzenesulfonamide (71.3 mg, 0.25 mmol, 2.5 equiv) according to the general procedure in the presence of chiral phosphoric acid **4** (7.0 mg, 0.01 mmol, 10 mol %), purified by silica gel column chromatography (petroleum ether/ EtOAc = 30:1 to 15:1) and obtained as a white solid (42.2 mg, 69%), mp: 150-151 °C.

**R<sub>f</sub>** (Petroleum ether/ EtOAc = 10:1) = 0.6.

**HPLC** (IE, *n*-hexane/*i*-PrOH = 80/20, flow rate = 2.0 mL/min, I = 254 nm) *t<sub>R</sub>* = 6.93 min (major), 8.63 min (minor), 92:8 er. **[α]<sub>D</sub><sup>26</sup>**: +34.0 (c: 0.10, CHCl<sub>3</sub>).

**<sup>1</sup>H NMR** (300 MHz, CDCl<sub>3</sub>) δ 7.20-7.11 (m, 3H), 7.10-6.99 (m, 4H), 6.86 (s, 4H), 6.60 (d, *J* = 7.5 Hz, 2H), 5.92 (s, 1H), 4.99 (s, 1H), 4.92 (s, 1H), 3.65 (d, *J* = 12.3 Hz, 2H), 3.44 (s, 3H), 3.25 (d, *J* = 12.3 Hz, 2H), 3.06 (d, *J* = 12.8 Hz, 1H), 2.49 (d, *J* = 12.9 Hz, 1H), 2.35 (s, 3H), 2.33 (s, 12H), 2.27 (s, 6H).

**<sup>13</sup>C NMR** (75 MHz, CDCl<sub>3</sub>) δ 142.9, 140.9, 138.3, 136.9, 136.4, 135.4, 131.7, 129.1, 128.7, 128.2, 127.9, 127.8, 118.4, 89.5, 56.9, 56.8, 52.7, 21.6, 21.0, 20.5.

**HRMS (ESI)** *m/z*: [M+H]<sup>+</sup> calcd for C<sub>38</sub>H<sub>47</sub>N<sub>2</sub>O<sub>3</sub>S 611.3302, found 611.3303.

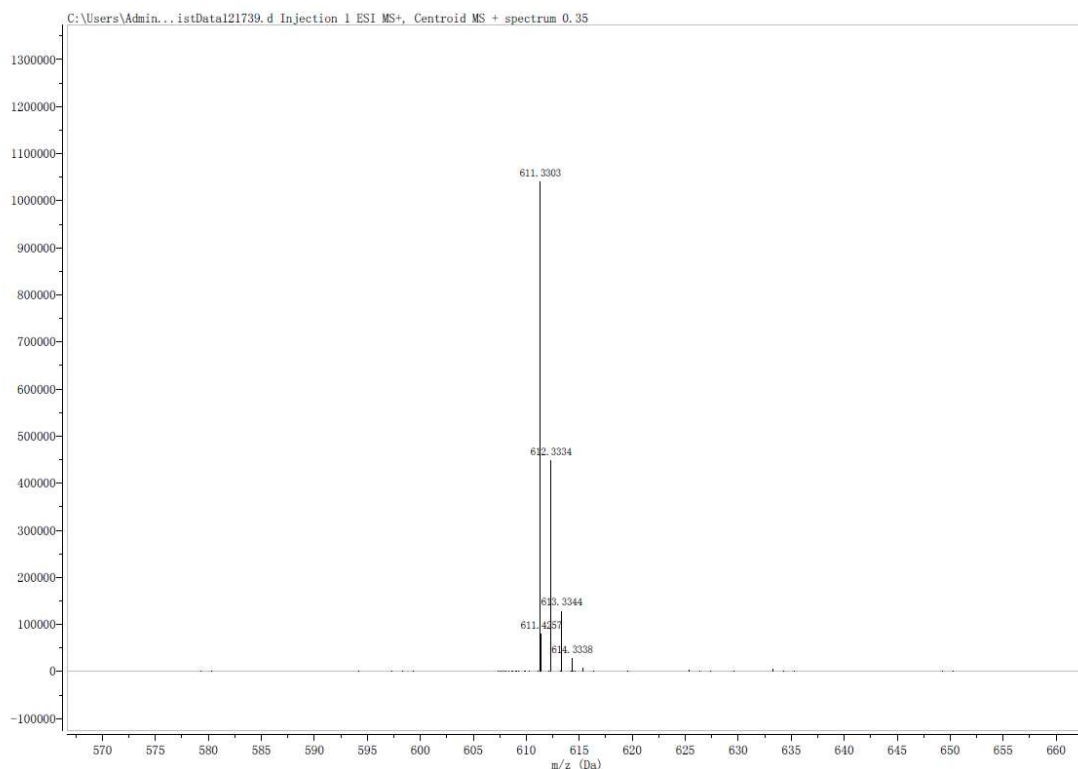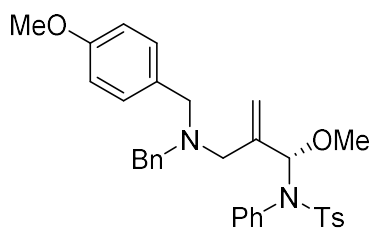

***(S)*-N-(2-((benzyl(4-methoxybenzyl)amino)methyl)-1-methoxyallyl)-4-methyl-N-phenylbenzenesulfonamide (3m')**:

Prepared via **general procedure 5** N-benzyl-1-methoxy-N-(4-methoxybenzyl)methanamine (27.1 mg, 0.1 mmol, 1.0 equiv) and 4-methyl-N-phenyl-N-(propa-1,2-dien-1-yl)benzenesulfonamide (71.3 mg, 0.25 mmol, 2.5 equiv) according to the general procedure in the

presence of chiral phosphoric acid **4** (7.0 mg, 0.01 mmol, 10 mol %), purified by silica gel column chromatography (petroleum ether/ EtOAc = 25:1 to 12:1) and obtained as a white solid (47.9 mg, 86%), mp: 114-115 °C.

**R<sub>f</sub>** (Petroleum ether/ EtOAc = 10:1) = 0.4.

**HPLC** (ID, *n*-hexane/*i*-PrOH = 90/10, flow rate = 1.0 mL/min, I = 254 nm) *t<sub>R</sub>* = 22.51 min (minor), 27.68 min (major), 92:8 er. **[α]<sub>D</sub><sup>26</sup>**: +20.0 (c: 0.10, CHCl<sub>3</sub>).

**<sup>1</sup>H NMR** (400 MHz, CDCl<sub>3</sub>) δ 7.44-7.34 (m, 8H), 7.28-7.23 (m, 1H), 7.17-7.12 (m, 3H), 7.05 (t, *J* = 7.7 Hz, 2H), 6.92 (d, *J* = 8.6 Hz, 2H), 6.74 (d, *J* = 7.4 Hz, 2H), 6.10 (s, 1H), 5.13 (s, 1H), 4.98 (s, 1H), 3.81 (s, 3H), 3.75-3.65 (m, 2H), 3.39 (s, 3H), 3.25-3.17 (m, 2H), 3.07 (d, *J* = 14.3 Hz, 1H), 2.64 (d, *J* = 14.3 Hz, 1H), 2.38 (s, 3H).

**<sup>13</sup>C NMR** (75 MHz, CDCl<sub>3</sub>) δ 158.7, 143.1, 140.7, 139.4, 137.0, 135.6, 131.4, 131.2, 129.8, 128.8, 128.7, 128.5, 128.2, 128.0, 126.9, 117.2, 113.9, 89.4, 58.2, 57.7, 56.7, 56.2, 55.4, 21.6.

**HRMS (ESI)** *m/z*: [M+H]<sup>+</sup> calcd for C<sub>33</sub>H<sub>37</sub>N<sub>2</sub>O<sub>4</sub>S 557.2469, found 557.2466.

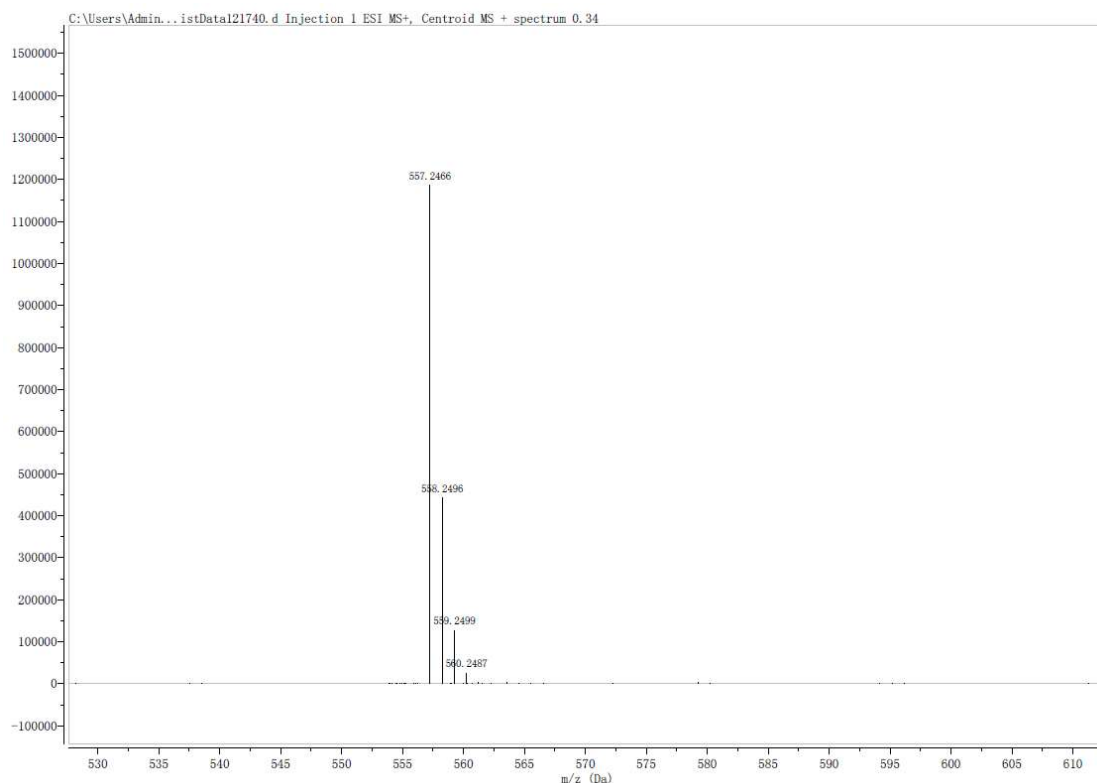

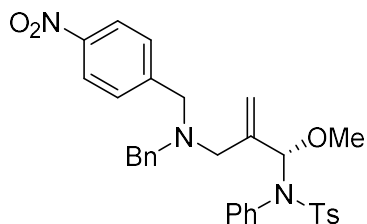

**(S)-N-(2-((benzyl(4-nitrobenzyl)amino)methyl)-1-methoxyallyl)-4-methyl-N-phenylbenzenesulfonamide (3n')**:

Prepared via **general procedure 5** N-benzyl-1-methoxy-N-(4-nitrobenzyl)methanamine (28.6 mg, 0.1 mmol, 1.0 equiv) and 4-methyl-N-phenyl-N-(propa-1,2-dien-1-yl)benzenesulfonamide (71.3 mg, 0.25 mmol, 2.5 equiv) according to the general procedure in the presence of chiral phosphoric acid **4** (7.0 mg, 0.01 mmol, 10 mol %), purified by silica gel column chromatography (petroleum ether/ EtOAc = 25:1 to 10:1) and obtained as yellow oil (41.2 mg, 72%).

**R<sub>f</sub>** (Petroleum ether/ EtOAc = 10:1) = 0.3.

**HPLC** (ID, *n*-hexane/*i*-PrOH = 70/30, flow rate = 1.0 mL/min, I = 254 nm) *t<sub>R</sub>* = 26.11 min (minor), 34.53 min (major), 93:7 er. **[α]<sub>D</sub><sup>26</sup>**: +36.0 (c: 0.10, CHCl<sub>3</sub>).

**<sup>1</sup>H NMR** (400 MHz, CDCl<sub>3</sub>) δ 8.24 (d, *J* = 8.3 Hz, 2H), 7.64 (d, *J* = 8.3 Hz, 2H), 7.45-7.37 (m, 6H), 7.31-7.26 (m, 1H), 7.18-7.14 (m, 3H), 7.05 (t, *J* = 7.7 Hz, 2H), 6.76 (d, *J* = 7.9 Hz, 2H), 6.12 (s, 1H), 5.17 (s, 1H), 5.04 (s, 1H), 3.83-3.73 (m, 2H), 3.39 (s, 3H), 3.38-3.26 (m, 2H), 3.11 (d, *J* = 14.3 Hz, 1H), 2.70 (d, *J* = 14.3 Hz, 1H), 2.39 (s, 3H).

**<sup>13</sup>C NMR** (75 MHz, CDCl<sub>3</sub>) δ 147.4, 147.1, 143.3, 140.1, 138.5, 136.6, 135.5, 131.1, 129.1, 128.9, 128.69, 128.66, 128.2, 128.1, 127.3, 123.8, 117.7, 89.2, 58.6, 57.8, 56.9, 56.6, 21.6.

**HRMS (ESI)** *m/z*: [M+H]<sup>+</sup> calcd for C<sub>32</sub>H<sub>34</sub>N<sub>3</sub>O<sub>5</sub>S 572.2214, found 572.2213.



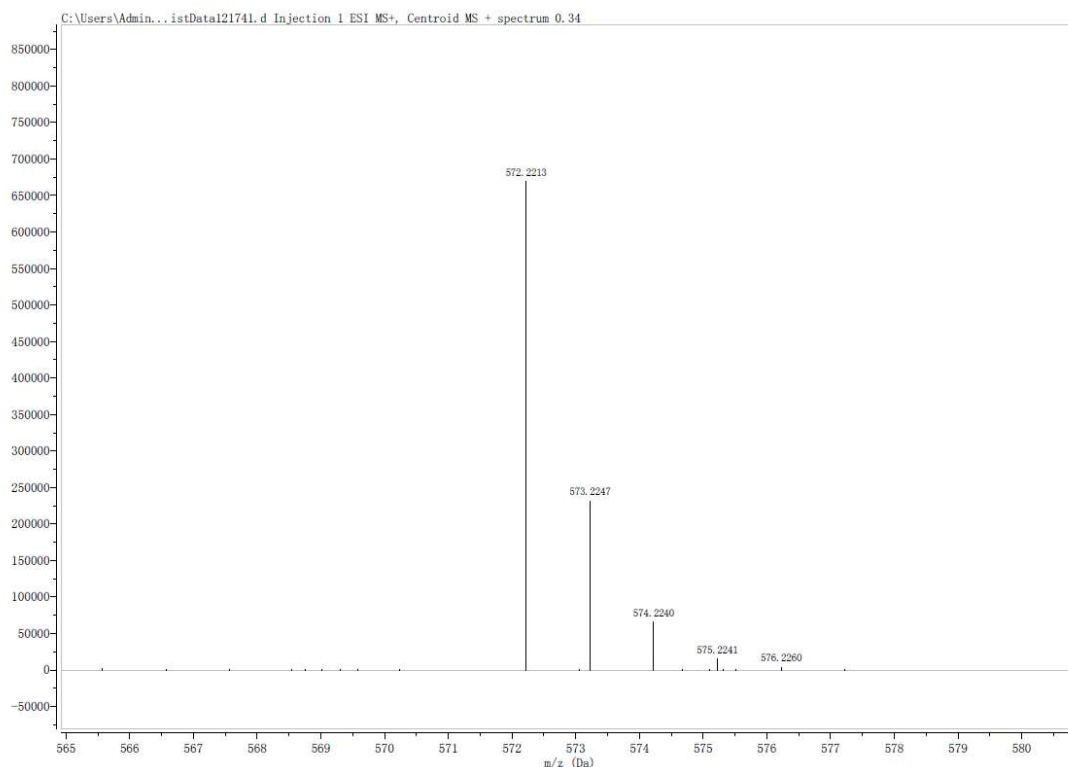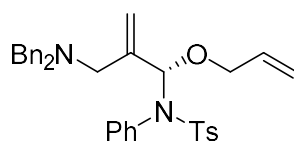

***(S)*-N-(1-(allyloxy)-2-((dibenzylamino)methyl)allyl)-4-methyl-N-phenylbenzenesulfonamide (3o')**

Prepared via **general procedure 5** 1-(allyloxy)-N,N-dibenzylmethanamine (26.7 mg, 0.1 mmol, 1.0 equiv) and 4-methyl-N-phenyl-N-(propa-1,2-dien-1-yl)benzenesulfonamide (71.3 mg, 0.25 mmol, 2.5 equiv) according to the general procedure in the presence of chiral phosphoric acid **4** (7.0 mg, 0.01 mmol, 10 mol %), purified by silica gel column chromatography (petroleum ether/EtOAc = 30:1 to 15:1) and obtained as a white solid (67.4 mg, 61%), mp: 63-64 °C.

**R<sub>f</sub>** (Petroleum ether/ EtOAc = 10:1) = 0.7.

**HPLC** (ID, *n*-hexane/*i*-PrOH = 90/10, flow rate = 0.5 mL/min, I = 254 nm) 21.32 min (major) t<sub>R</sub> = 22.94 min (minor), 89:11 er. [α]<sub>D</sub><sup>26</sup>: +56.0 (c: 0.10, CHCl<sub>3</sub>).

**<sup>1</sup>H NMR** (400 MHz, CDCl<sub>3</sub>) δ 7.47-7.43 (m, 4H), 7.40-7.35 (m, 6H), 7.27-7.23 (m, 2H), 7.17-7.13 (m, 1H), 7.10 (d, *J* = 8.1 Hz, 2H), 7.06-7.02 (m, 2H), 6.76 (d, *J* = 7.5 Hz, 2H), 6.25 (s, 1H), 5.91-5.82 (m, 1H), 5.19-5.10 (m, 3H), 5.03 (s, 1H), 4.19-4.15 (m, 1H), 4.03-3.98 (m, 1H), 3.74 (d, *J* = 13.8 Hz, 2H), 3.23 (d, *J* = 13.8 Hz, 2H), 3.10 (d, *J* = 14.3 Hz, 1H), 2.66 (d, *J* = 14.3 Hz, 1H), 2.36 (s, 3H).

$^{13}\text{C}$  NMR (100 MHz,  $\text{CDCl}_3$ )  $\delta$  143.1, 140.8, 139.3, 136.8, 135.7, 133.8, 131.4, 128.83, 128.75, 128.5, 128.3, 128.1, 128.0, 127.0, 117.5, 116.7, 87.4, 69.8, 58.5, 56.5, 21.6.

HRMS (ESI)  $m/z$ :  $[\text{M}+\text{H}]^+$  calcd for  $\text{C}_{34}\text{H}_{37}\text{N}_2\text{O}_3\text{S}$  553.2519, found 553.2521

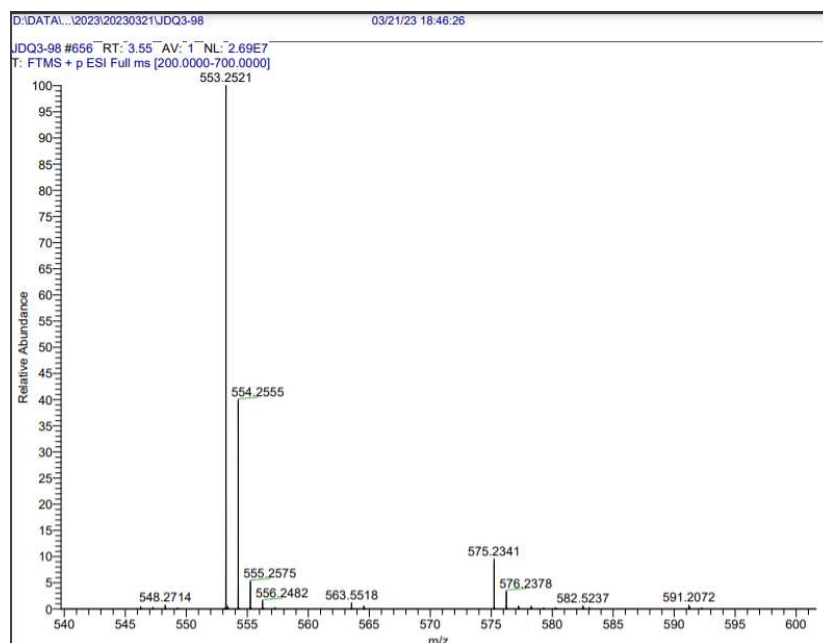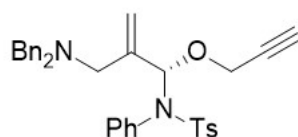

*(S)*-*N*-(2-((dibenzylamino)methyl)-1-(prop-2-yn-1-yloxy)allyl)-4-methyl-*N*-phenylbenzenesulfonamide (3p')

Prepared via **general procedure 5** *N,N*-dibenzyl-1-(prop-2-yn-1-yloxy)methanamine (26.5 mg, 0.1 mmol, 1.0 equiv) and 4-methyl-*N*-phenyl-*N*-(propa-1,2-dien-1-yl)benzenesulfonamide (71.3 mg, 0.25 mmol, 2.5 equiv) according to the general procedure in the presence of chiral phosphoric acid **4** (7.0 mg, 0.01 mmol, 10 mol %), purified by silica gel column chromatography (petroleum ether/ EtOAc = 30:1 to 15:1) and obtained as colorless oil (49.0 mg, 89%).

$R_f$  (Petroleum ether/ EtOAc = 10:1) = 0.6.

HPLC (ID, *n*-hexane/*i*-PrOH = 80/20, flow rate = 1 mL/min, I = 254 nm) 9.43 min (minor)  $t_R$  = 11.13 min (major), 89:11 er.  $[\alpha]_D^{26}$ : +78.0 (c: 0.10,  $\text{CHCl}_3$ ).

$^1\text{H}$  NMR (400 MHz,  $\text{CDCl}_3$ )  $\delta$  7.49-7.44 (m, 6H), 7.40-7.35 (m, 4H), 7.28-7.22 (m, 2H), 7.17-7.12 (m, 3H), 7.06-7.02 (m, 2H), 6.75-6.71 (m, 2H), 6.39 (s, 1H), 5.14 (s, 1H), 5.00 (s, 1H), 4.20 (d,  $J$  =

2.4 Hz, 2H), 3.76 (d,  $J = 13.8$  Hz, 2H), 3.24 (d,  $J = 13.8$  Hz, 2H), 3.12 (d,  $J = 14.3$  Hz, 1H), 2.66 (d,  $J = 14.3$  Hz, 1H), 2.44 (t,  $J = 2.4$  Hz, 1H), 2.37 (s, 3H).

$^{13}\text{C}$  NMR (75 MHz,  $\text{CDCl}_3$ )  $\delta$  143.2, 140.3, 139.2, 136.7, 135.5, 131.4, 128.9, 128.8, 128.5, 128.4, 128.12, 128.08, 127.0, 117.9, 87.0, 79.0, 75.2, 58.4, 56.5, 56.2, 21.6.

HRMS (ESI)  $m/z$ :  $[\text{M}+\text{H}]^+$  calcd for  $\text{C}_{34}\text{H}_{35}\text{N}_2\text{O}_3\text{S}$  551.2363, found 551.2365.

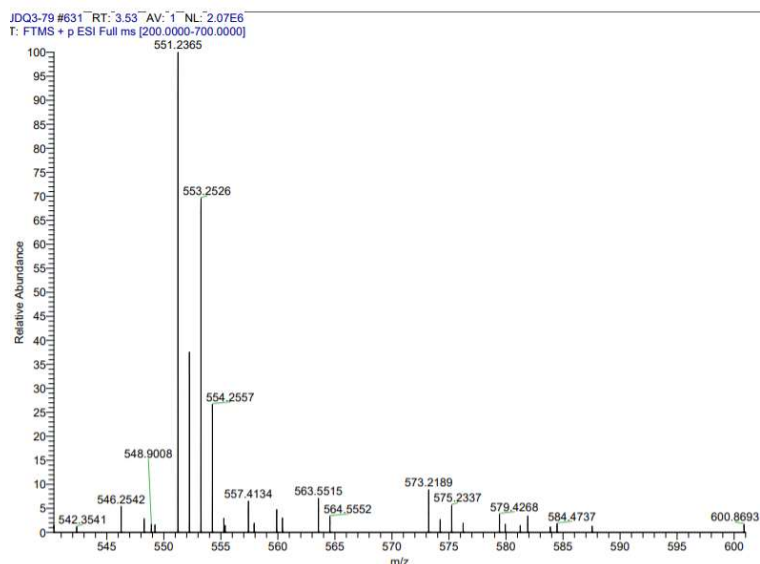

## X-ray crystallographic data of 3a and 3b'

The crystal structures have been deposited at the Cambridge Crystallographic Data Centre (1958463, **3a**) and (2226527, **3b'**). The data can be obtained free of charge via the internet at <https://www.ccdc.cam.ac.uk/structures/>. The measurements were taken in a Bruker APEX-II CCD diffractometer. The data were integrated by Bruker APEX2 with multi-scan absorption corrections. The structure solution and refinement were processed by SHELXL (2018/3).

**Method of crystallization:** A solution of **3a** in  $\text{CHCl}_3$  and petroleum ether was evaporated the solvent slowly at room temperature.

### Crystal data structure for 3a

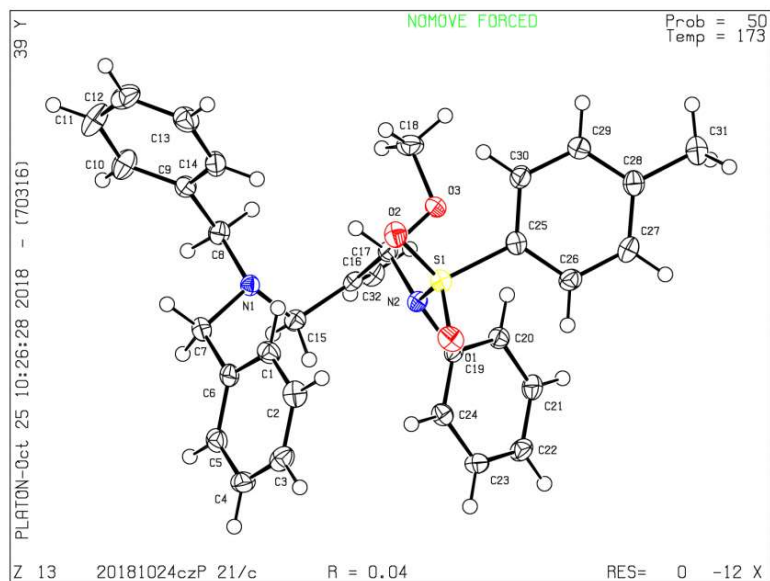

X-ray structure of **3a**. Thermal ellipsoids are shown at the 50% level.

|                                         |                                                                 |                           |
|-----------------------------------------|-----------------------------------------------------------------|---------------------------|
| Empirical formula                       | C <sub>32</sub> H <sub>34</sub> N <sub>2</sub> O <sub>3</sub> S |                           |
| Formula weight                          | 526.67                                                          |                           |
| Temperature                             | 173 K                                                           |                           |
| Wavelength                              | 0.71073 Å                                                       |                           |
| Crystal system                          | Monoclinic                                                      |                           |
| Space group                             | 'P 21/c'                                                        |                           |
| Unit cell dimensions                    | a = 9.8161(5) Å                                                 | $\alpha = 90^\circ$       |
|                                         | b = 17.3216(10) Å                                               | $\beta = 92.516(2)^\circ$ |
|                                         | c = 16.6079(10) Å                                               | $\gamma = 90^\circ$       |
| Volume                                  | 2821.1(3) Å <sup>3</sup>                                        |                           |
| Z                                       | 4                                                               |                           |
| Density (calculated)                    | 1.240 g/cm <sup>3</sup>                                         |                           |
| Absorption coefficient                  | 0.150 mm <sup>-1</sup>                                          |                           |
| F(000)                                  | 1120                                                            |                           |
| Crystal size                            | 0.190 x 0.160 x 0.150 mm <sup>3</sup>                           |                           |
| $\theta$ range for data collection      | 2.352 to 25.009°                                                |                           |
| Index ranges                            | -8 ≤ h ≤ 11, -20 ≤ k ≤ 20, -19 ≤ l ≤ 19                         |                           |
| Reflections collected                   | 19950                                                           |                           |
| Independent reflections                 | 4979 (R <sub>int</sub> = 0.0472)                                |                           |
| Completeness to $\theta = 67.679^\circ$ | 99.9 %                                                          |                           |
| Max. and min. transmission              | 0.972 and 0.978                                                 |                           |
| Data / restraints / parameters          | 4979 / 0 / 345                                                  |                           |
| Goodness-of-fit on F <sup>2</sup>       | 1.015                                                           |                           |
| Final R indices [I > 2 $\sigma$ (I)]    | R <sub>1</sub> = 0.0374, wR <sub>2</sub> = 0.0877               |                           |
| R indices (all data)                    | R <sub>1</sub> = 0.0498, wR <sub>2</sub> = 0.0944               |                           |

|                             |                                    |
|-----------------------------|------------------------------------|
| Largest diff. peak and hole | 0.304 and -0.365 e.Å <sup>-3</sup> |
|-----------------------------|------------------------------------|

**Method of crystallization:** A solution of **3b'** in CHCl<sub>3</sub> and petroleum ether was evaporated the solvent slowly at room temperature.

**Crystal data and structure for 3b'**

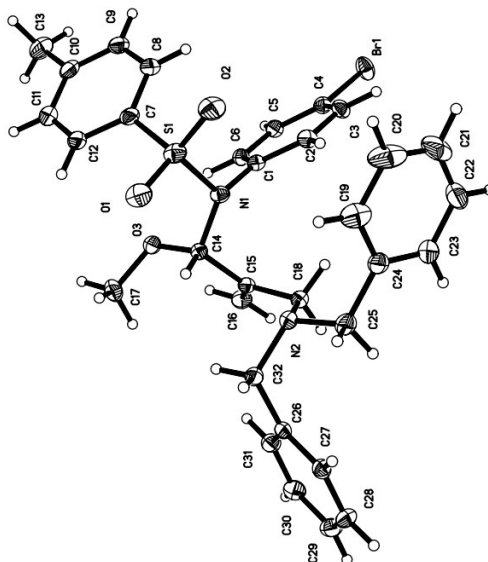

X-ray structure of **3b'**. Thermal ellipsoids are shown at the 50% level.

|                             |                                                                    |          |
|-----------------------------|--------------------------------------------------------------------|----------|
| Empirical formula           | C <sub>32</sub> H <sub>33</sub> Br N <sub>2</sub> O <sub>3</sub> S |          |
| Formula weight              | 605.57                                                             |          |
| Temperature                 | 193 K                                                              |          |
| Wavelength                  | 1.34139 Å                                                          |          |
| Crystal system              | orthorhombic                                                       |          |
| Space group                 | 'P 21 21 21'                                                       |          |
| Unit cell dimensions        | a = 9.6485(3) Å                                                    | α = 90 ° |
|                             | b = 13.5819(4) Å                                                   | β = 90 ° |
|                             | c = 22.0979(6) Å                                                   | γ = 90 ° |
| Volume                      | 2895.82(15) Å <sup>3</sup>                                         |          |
| Z                           | 4                                                                  |          |
| Density (calculated)        | 1.389 g/cm <sup>3</sup>                                            |          |
| Absorption coefficient      | 1.904 mm <sup>-1</sup>                                             |          |
| F(000)                      | 1256                                                               |          |
| Crystal size                | 0.110 x 0.090 x 0.080 mm <sup>3</sup>                              |          |
| θ range for data collection | 3.323 to 53.857°                                                   |          |
| Index ranges                | -11 ≤ h ≤ 9, -16 ≤ k ≤ 12, -26 ≤ l ≤ 24                            |          |
| Reflections collected       | 16873                                                              |          |

|                                         |                                      |
|-----------------------------------------|--------------------------------------|
| Independent reflections                 | 5124 ( $R_{\text{int}} = 0.0435$ )   |
| Completeness to $\theta = 67.679^\circ$ | 97.3%                                |
| Max. and min. transmission              | 0.818 and 0.863                      |
| Data / restraints / parameters          | 5124 / 0 / 354                       |
| Goodness-of-fit on $F^2$                | 1.045                                |
| Final R indices [ $I > 2\sigma(I)$ ]    | $R_1 = 0.0262$ , $wR_2 = 0.0684$     |
| R indices (all data)                    | $R_1 = 0.0273$ , $wR_2 = 0.0694$     |
| Largest diff. peak and hole             | 0.210 and -0.262 $e.\text{\AA}^{-3}$ |
| Flack parameter                         | 0.036(8)                             |

## References

- (a) Suárez-Pantiga, S.; Hernández-Díaz, C.; Piedrafita, M.; Rubio, E.; González, J. M. *Adv. Synth. Catal.* **2012**, *354*, 1651. (b) Yang, X.; Toste, F. D. *Chem. Sci.* **2016**, *7*, 2653. (c) Wei, L.-L.; Mulder, J. A.; Xiong, H.; Zifcick, C. A.; Douglas, C. J.; Hsung, R. P. *Tetrahedron* **2001**, *57*, 459. (d) De, N.; Song, C. E.; Ryu, D. H.; Yoo, E. J. *Chem. Commun.* **2018**, *54*, 6911. (e) Li, H.-H.; Li, X.-X.; Zhao, Z.-G.; Yuan, X.; Sun, C.-Y. *Org. Biomol. Chem.* **2017**, *15*, 4005. (f) Peng, S.; Cao, S.; Sun, J. *Org. Lett.* **2017**, *19*, 524. (g) Banerjee, S.; Senthilkumar, B.; Patil N. T. *Org. Lett.* **2019**, *21*, 180. (h) Kawata, Y.; Arai, S.; Nakajima M.; Nishida, A. *Tetrahedron Lett.* **2021**, *69*, 152974. (i) Wang, C.; Xu, G.; Shao, Y.; Tang, S.; Sun, J. *Org. Lett.* **2020**, *22*, 5990. (j) Suarez-Pantiga, S.; Hernandez-Diaz, C.; Rubio, E.; Gonzalez, J. M. *Angew. Chem. Int. Ed.* **2012**, *51*, 11552.
- (a) Kona, C. N.; Ramana, C. V. *Chem. Commun.* **2014**, *50*, 2152. (b) Wang, Y.; Jiang, M.; Liu, J.-T. *Adv. Synth. Catal.* **2014**, *356*, 2907. (c) Bernar, I.; Fiser, B.; Blanco-Ania, D.; Gomez-Bengoa, E.; Rutjes, F. P. J. T. *Org. Lett.* **2017**, *19*, 4211.
- (a) Yu, J.; Chen, L.; Sun, J. *Org. Lett.* **2019**, *21*, 1664. (b) Wang, K.; Yu, J.; Shao, Y.; Tang, S.; Sun, J. *Angew. Chem. Int. Ed.* **2020**, *59*, 2351

7.45  
7.44  
7.40  
7.39  
7.38  
7.37  
7.35  
7.29  
7.27  
7.25  
7.17  
7.15  
7.15  
7.13  
7.06  
7.04  
7.02  
6.74  
6.72

6.10  
5.15  
4.99

3.75  
3.72  
3.39  
3.26  
3.23  
3.10  
3.06

2.68  
2.64  
2.38

1.55  
1.26

0.00

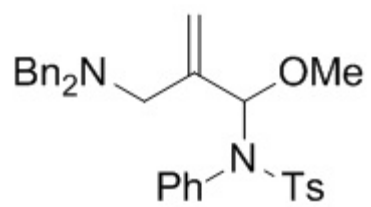

CDCl<sub>3</sub>, 400 MHz

3a

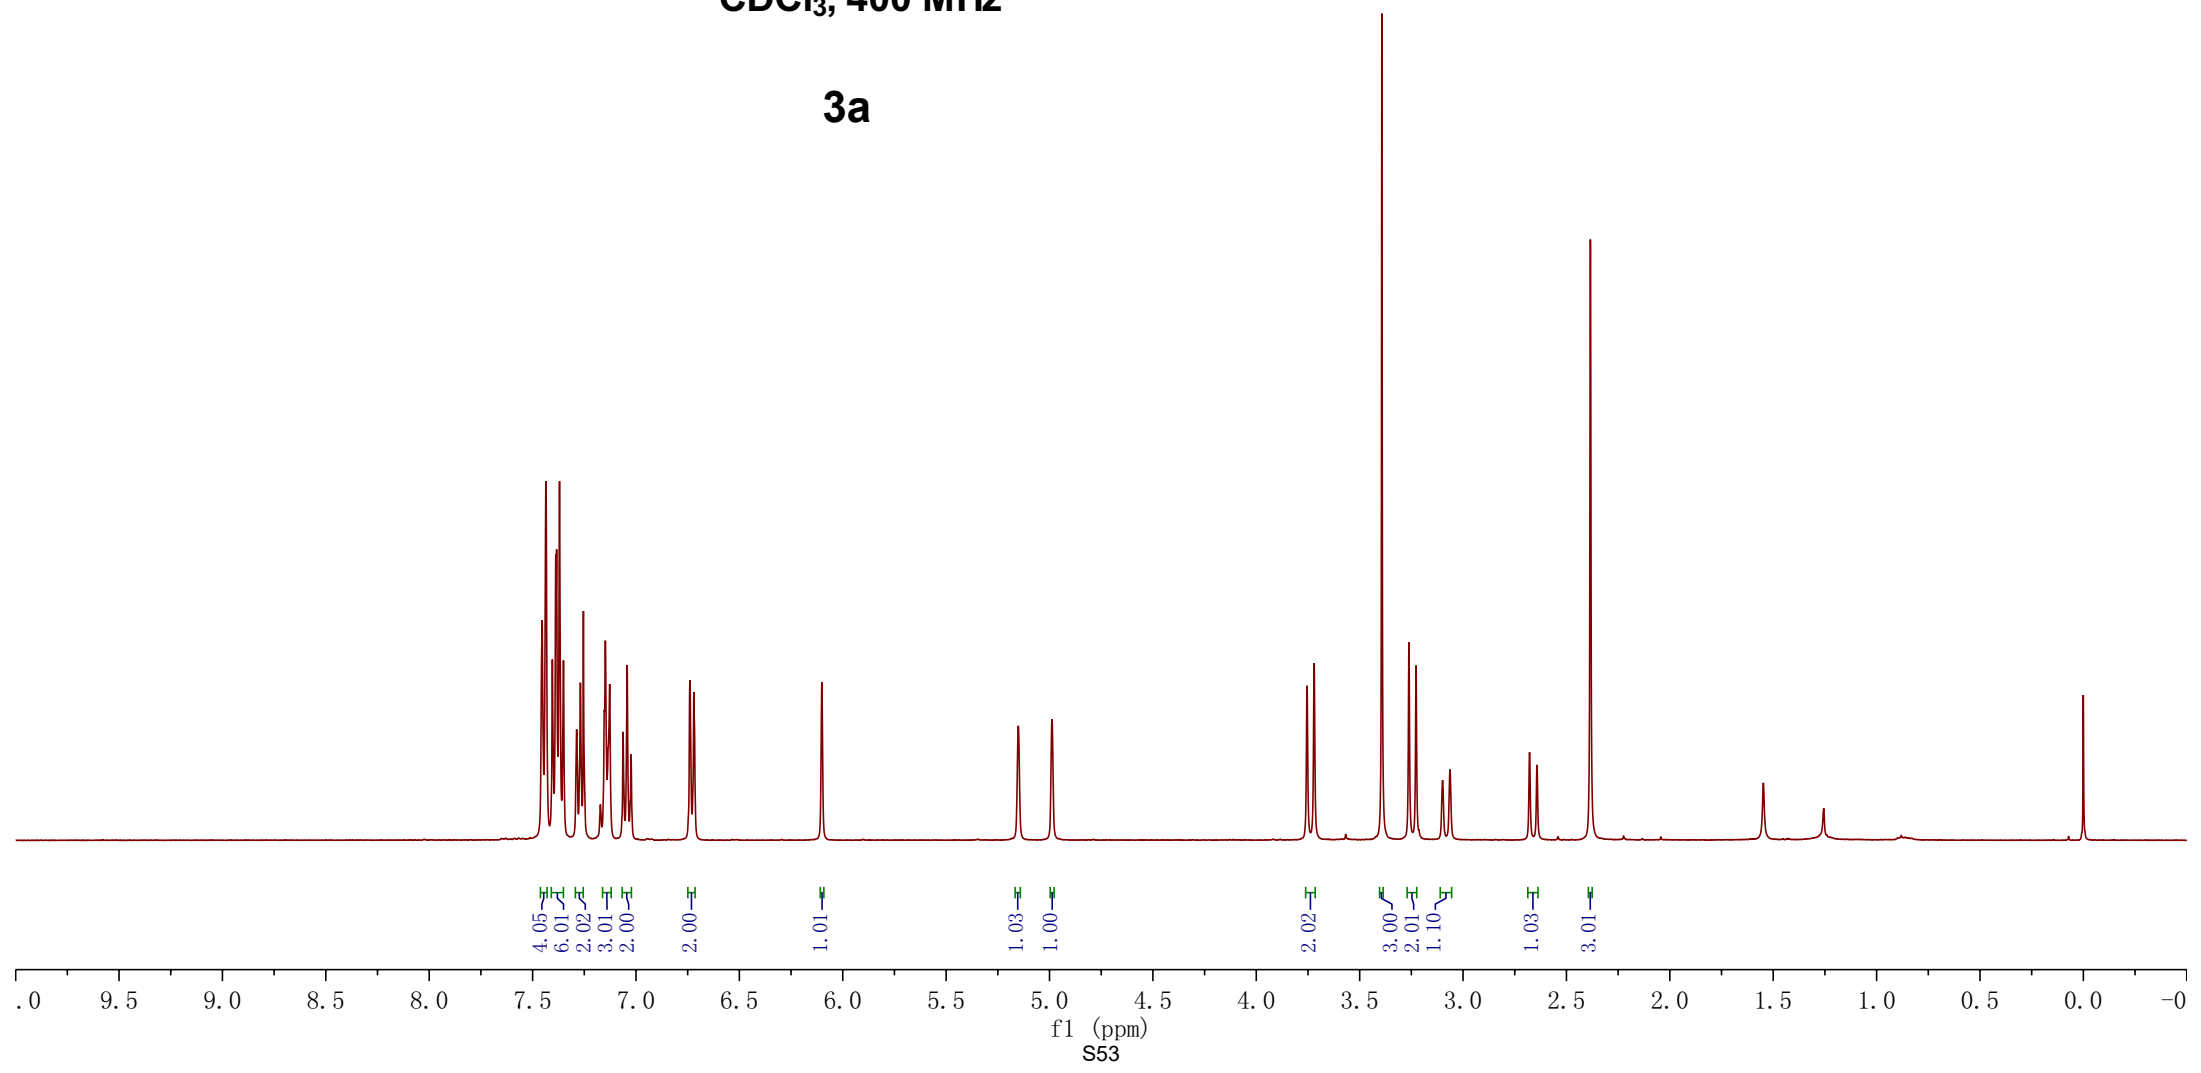

143.09  
140.61  
139.25  
136.99  
135.62  
131.33  
128.79  
128.70  
128.46  
128.20  
127.99  
127.96  
126.92  
117.18

89.36

58.37  
56.71  
56.34

21.55

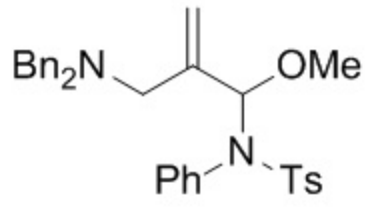

CDCl<sub>3</sub>, 75 MHz

3a

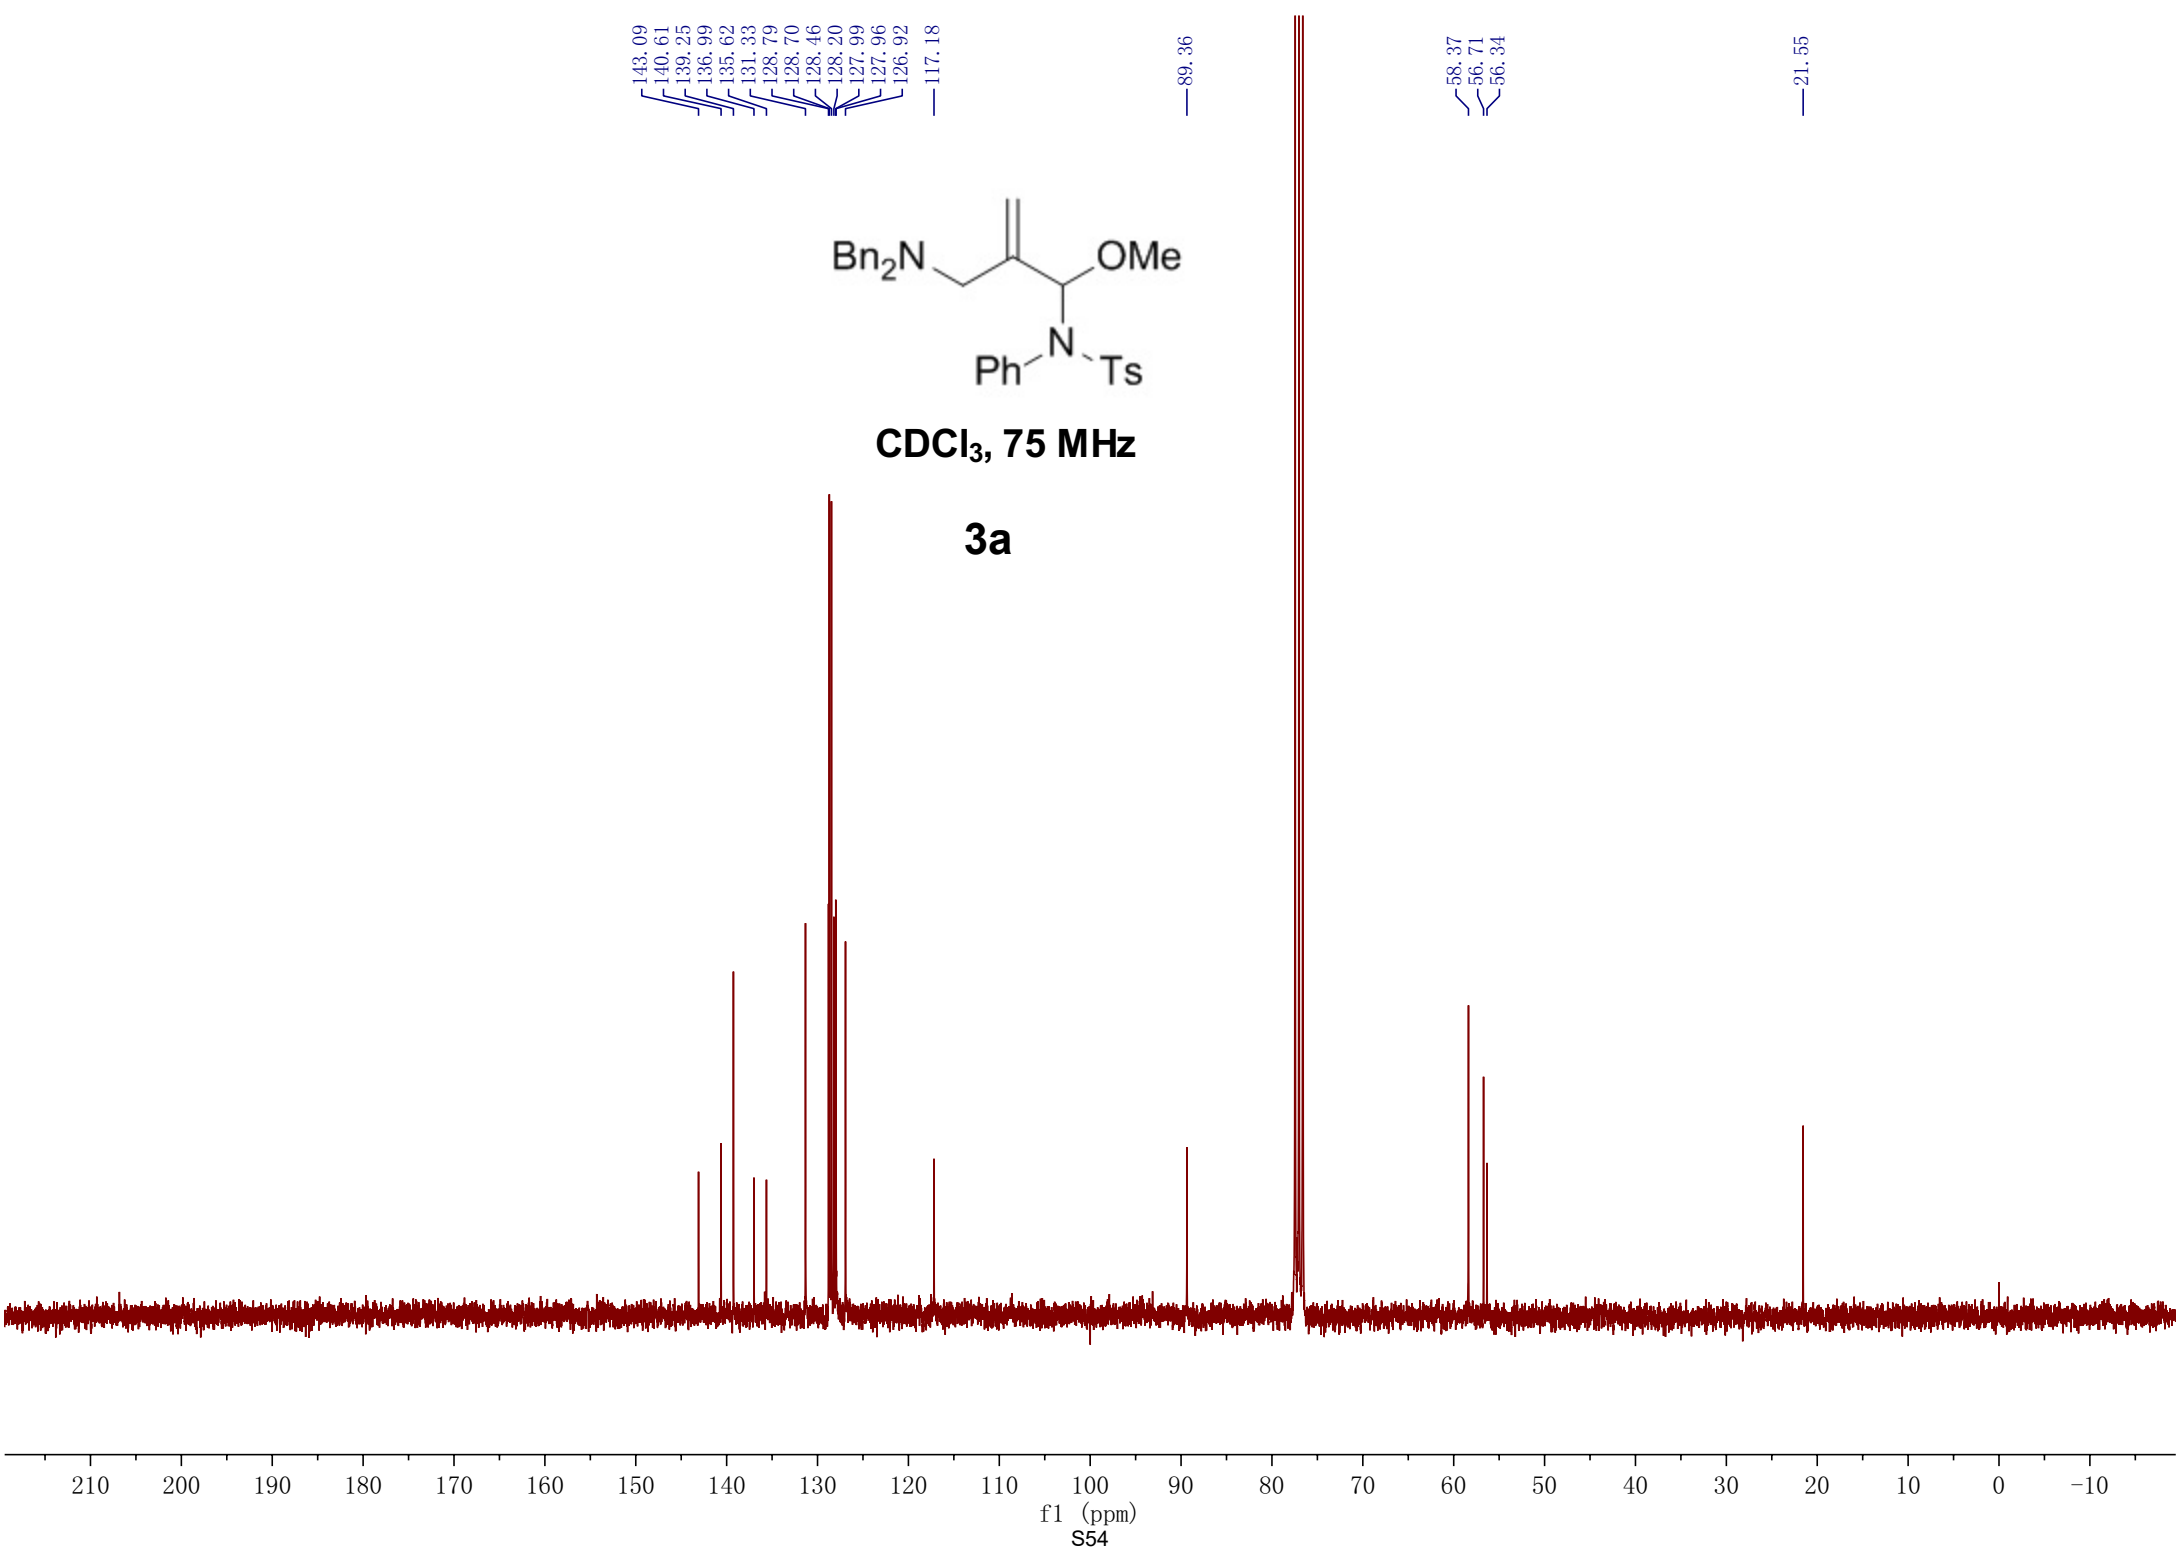



7.44  
7.42  
7.38  
7.36  
7.34  
7.27  
7.25  
7.24  
7.23  
7.19  
7.17  
7.16  
7.14  
7.12  
7.00  
6.98

6.03

5.18  
5.16

3.81  
3.78

3.44

3.13  
3.10  
3.08

3.05  
2.89

2.58  
2.55

1.26

0.00

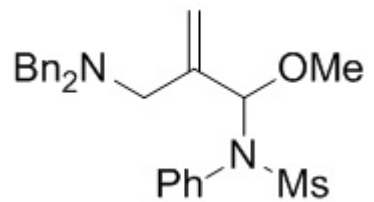

CDCl<sub>3</sub>, 400 MHz

3b

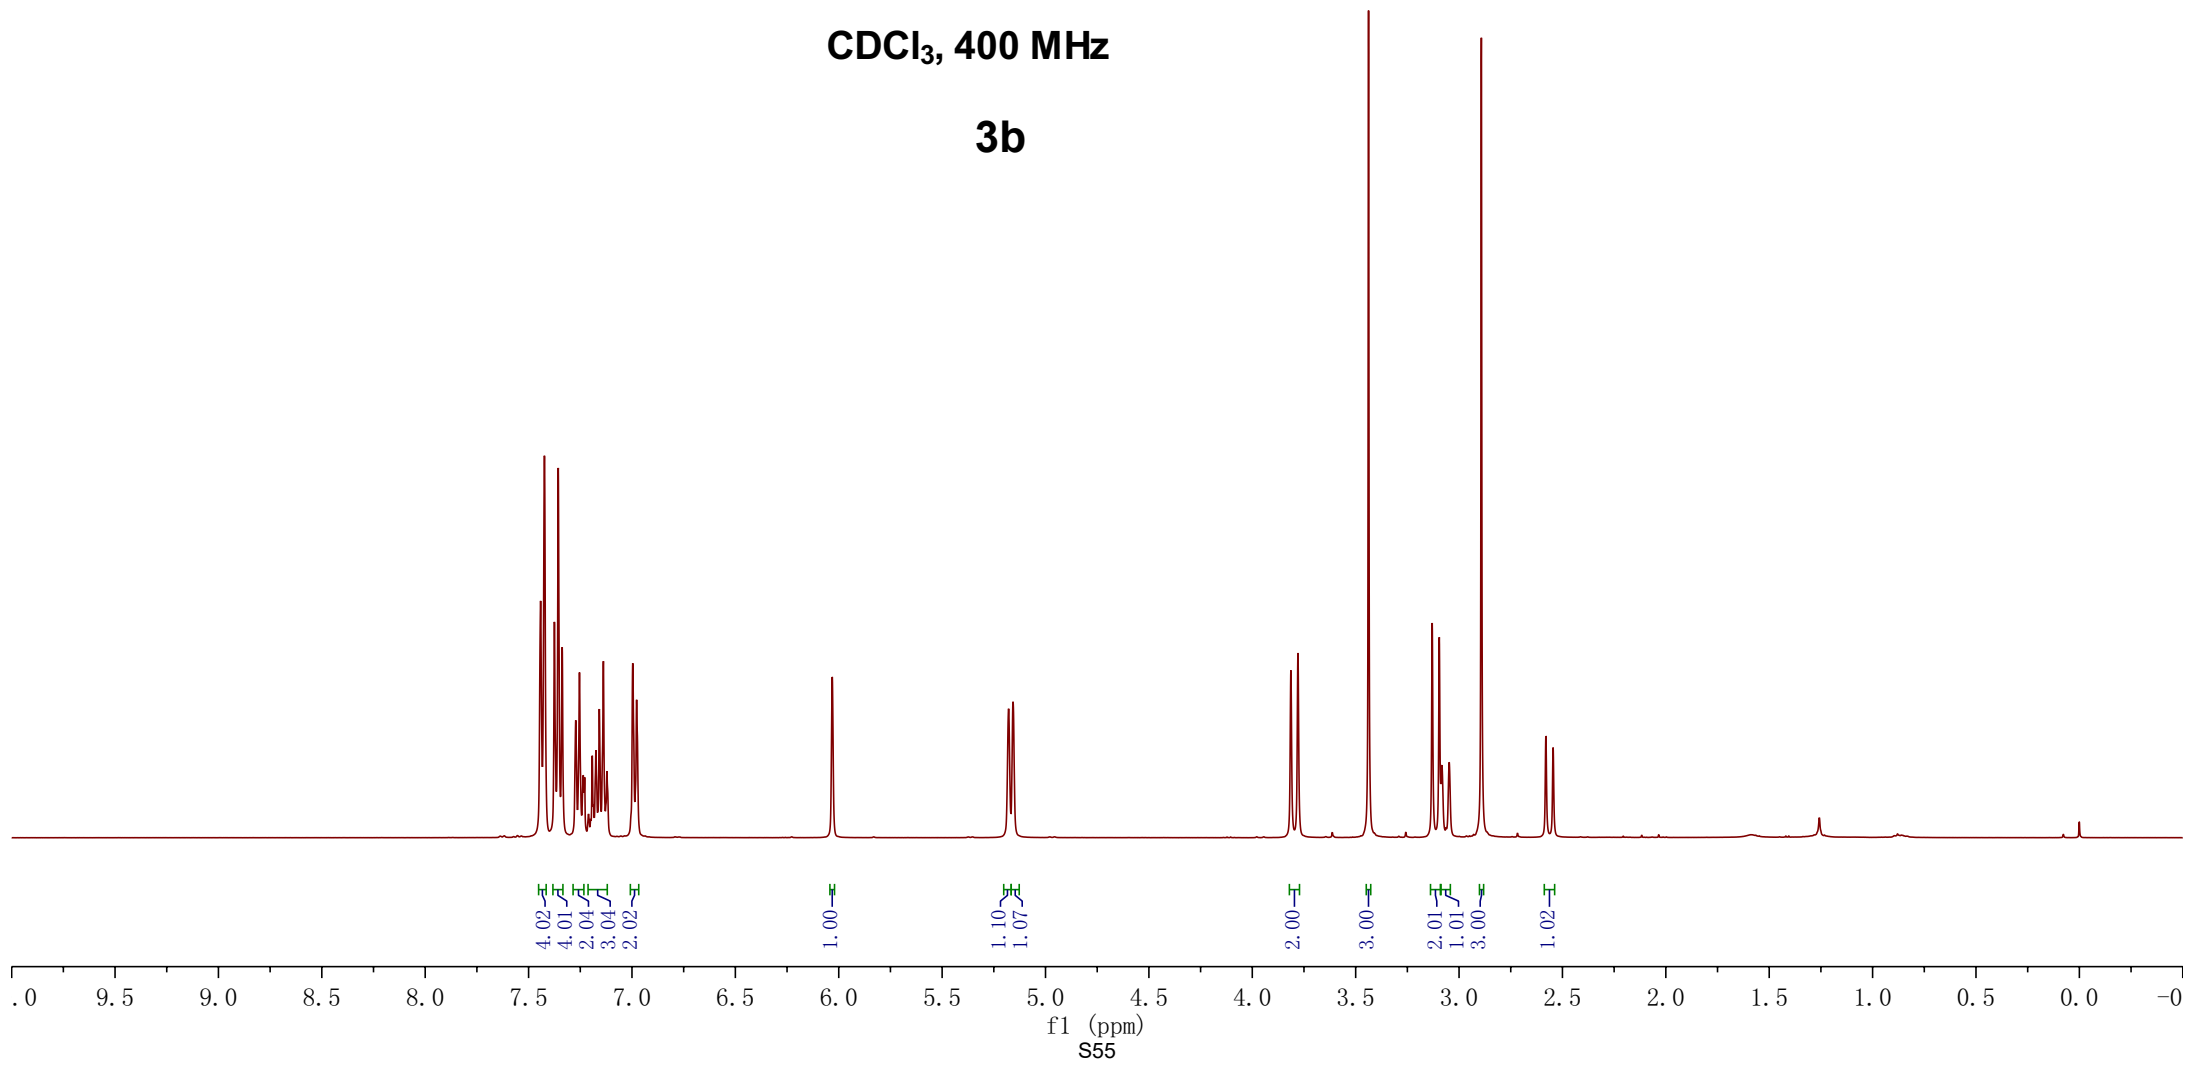

140.12  
139.23  
136.09  
130.64  
128.76  
128.56  
128.45  
128.19  
127.01  
118.04

89.45

58.51  
57.09  
56.49

39.56

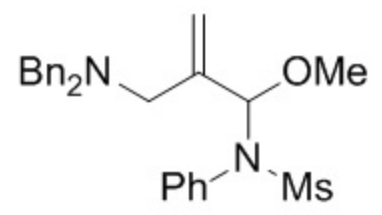

CDCl<sub>3</sub>, 100 MHz

3b

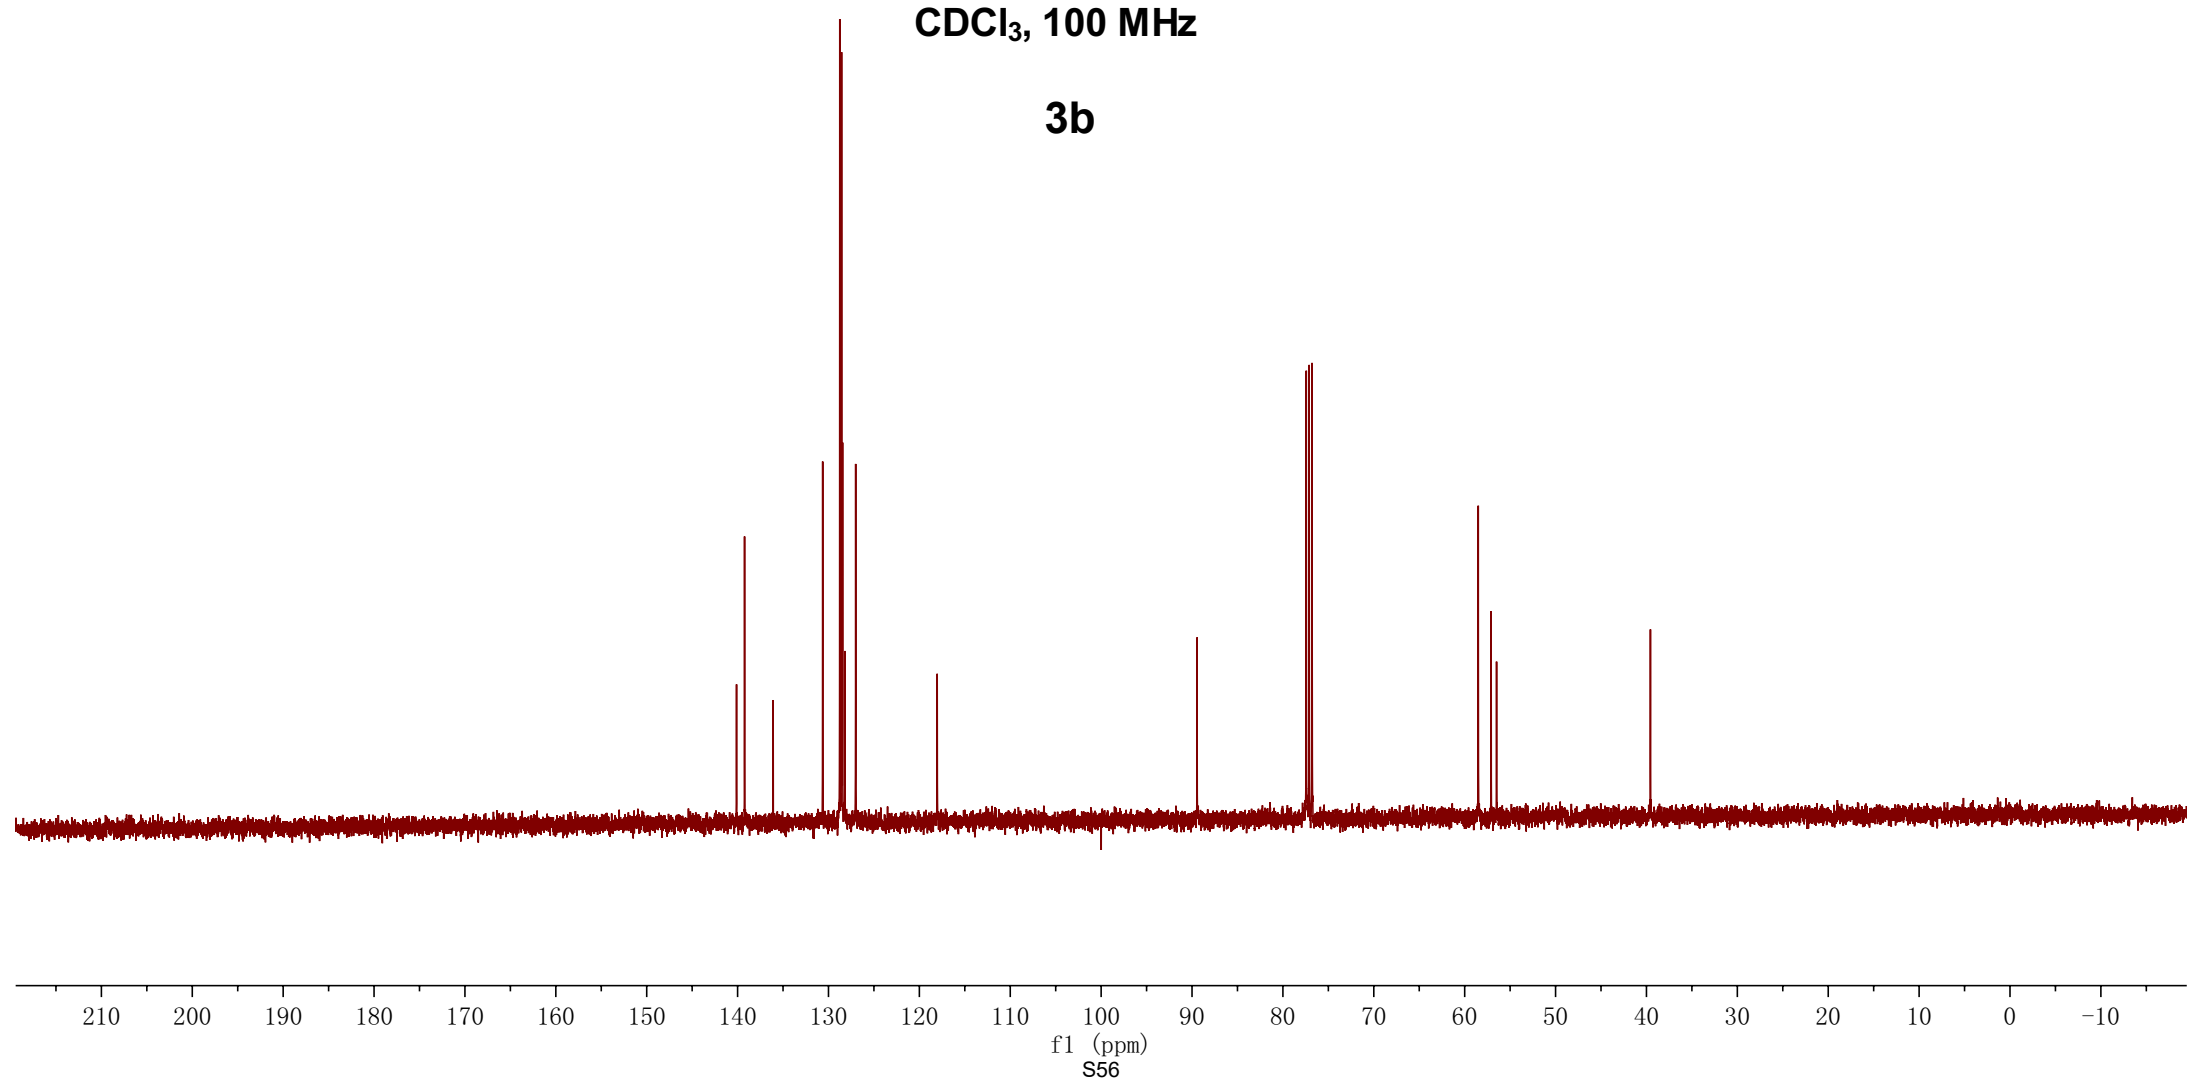

7.45  
7.43  
7.37  
7.35  
7.33  
7.27  
7.25  
7.25  
7.24  
7.20  
7.19  
7.17  
7.16  
7.14  
6.59

5.11  
5.09

3.81  
3.78

3.50

3.14  
3.11  
3.04  
3.01

2.61  
2.58

1.77

1.26

-0.00

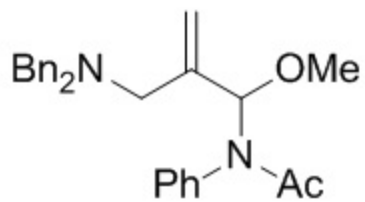

**CDCl<sub>3</sub>, 400 MHz**

**3c**

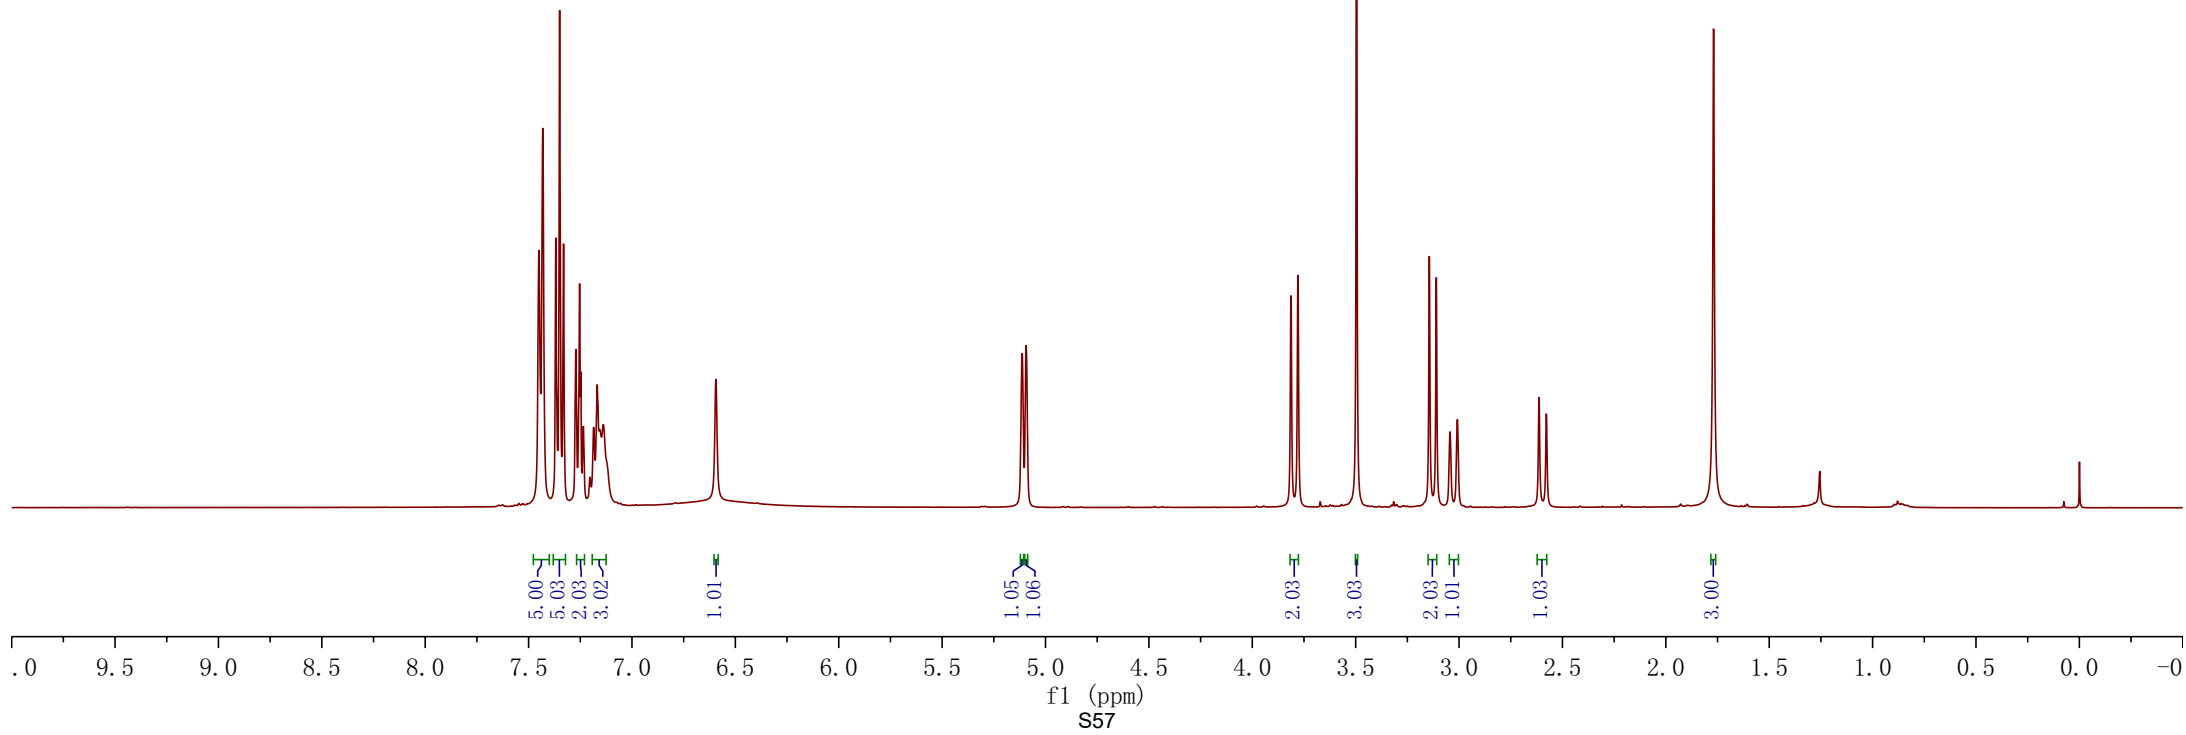

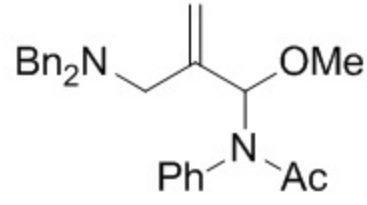

CDCl<sub>3</sub>, 100 MHz

3c

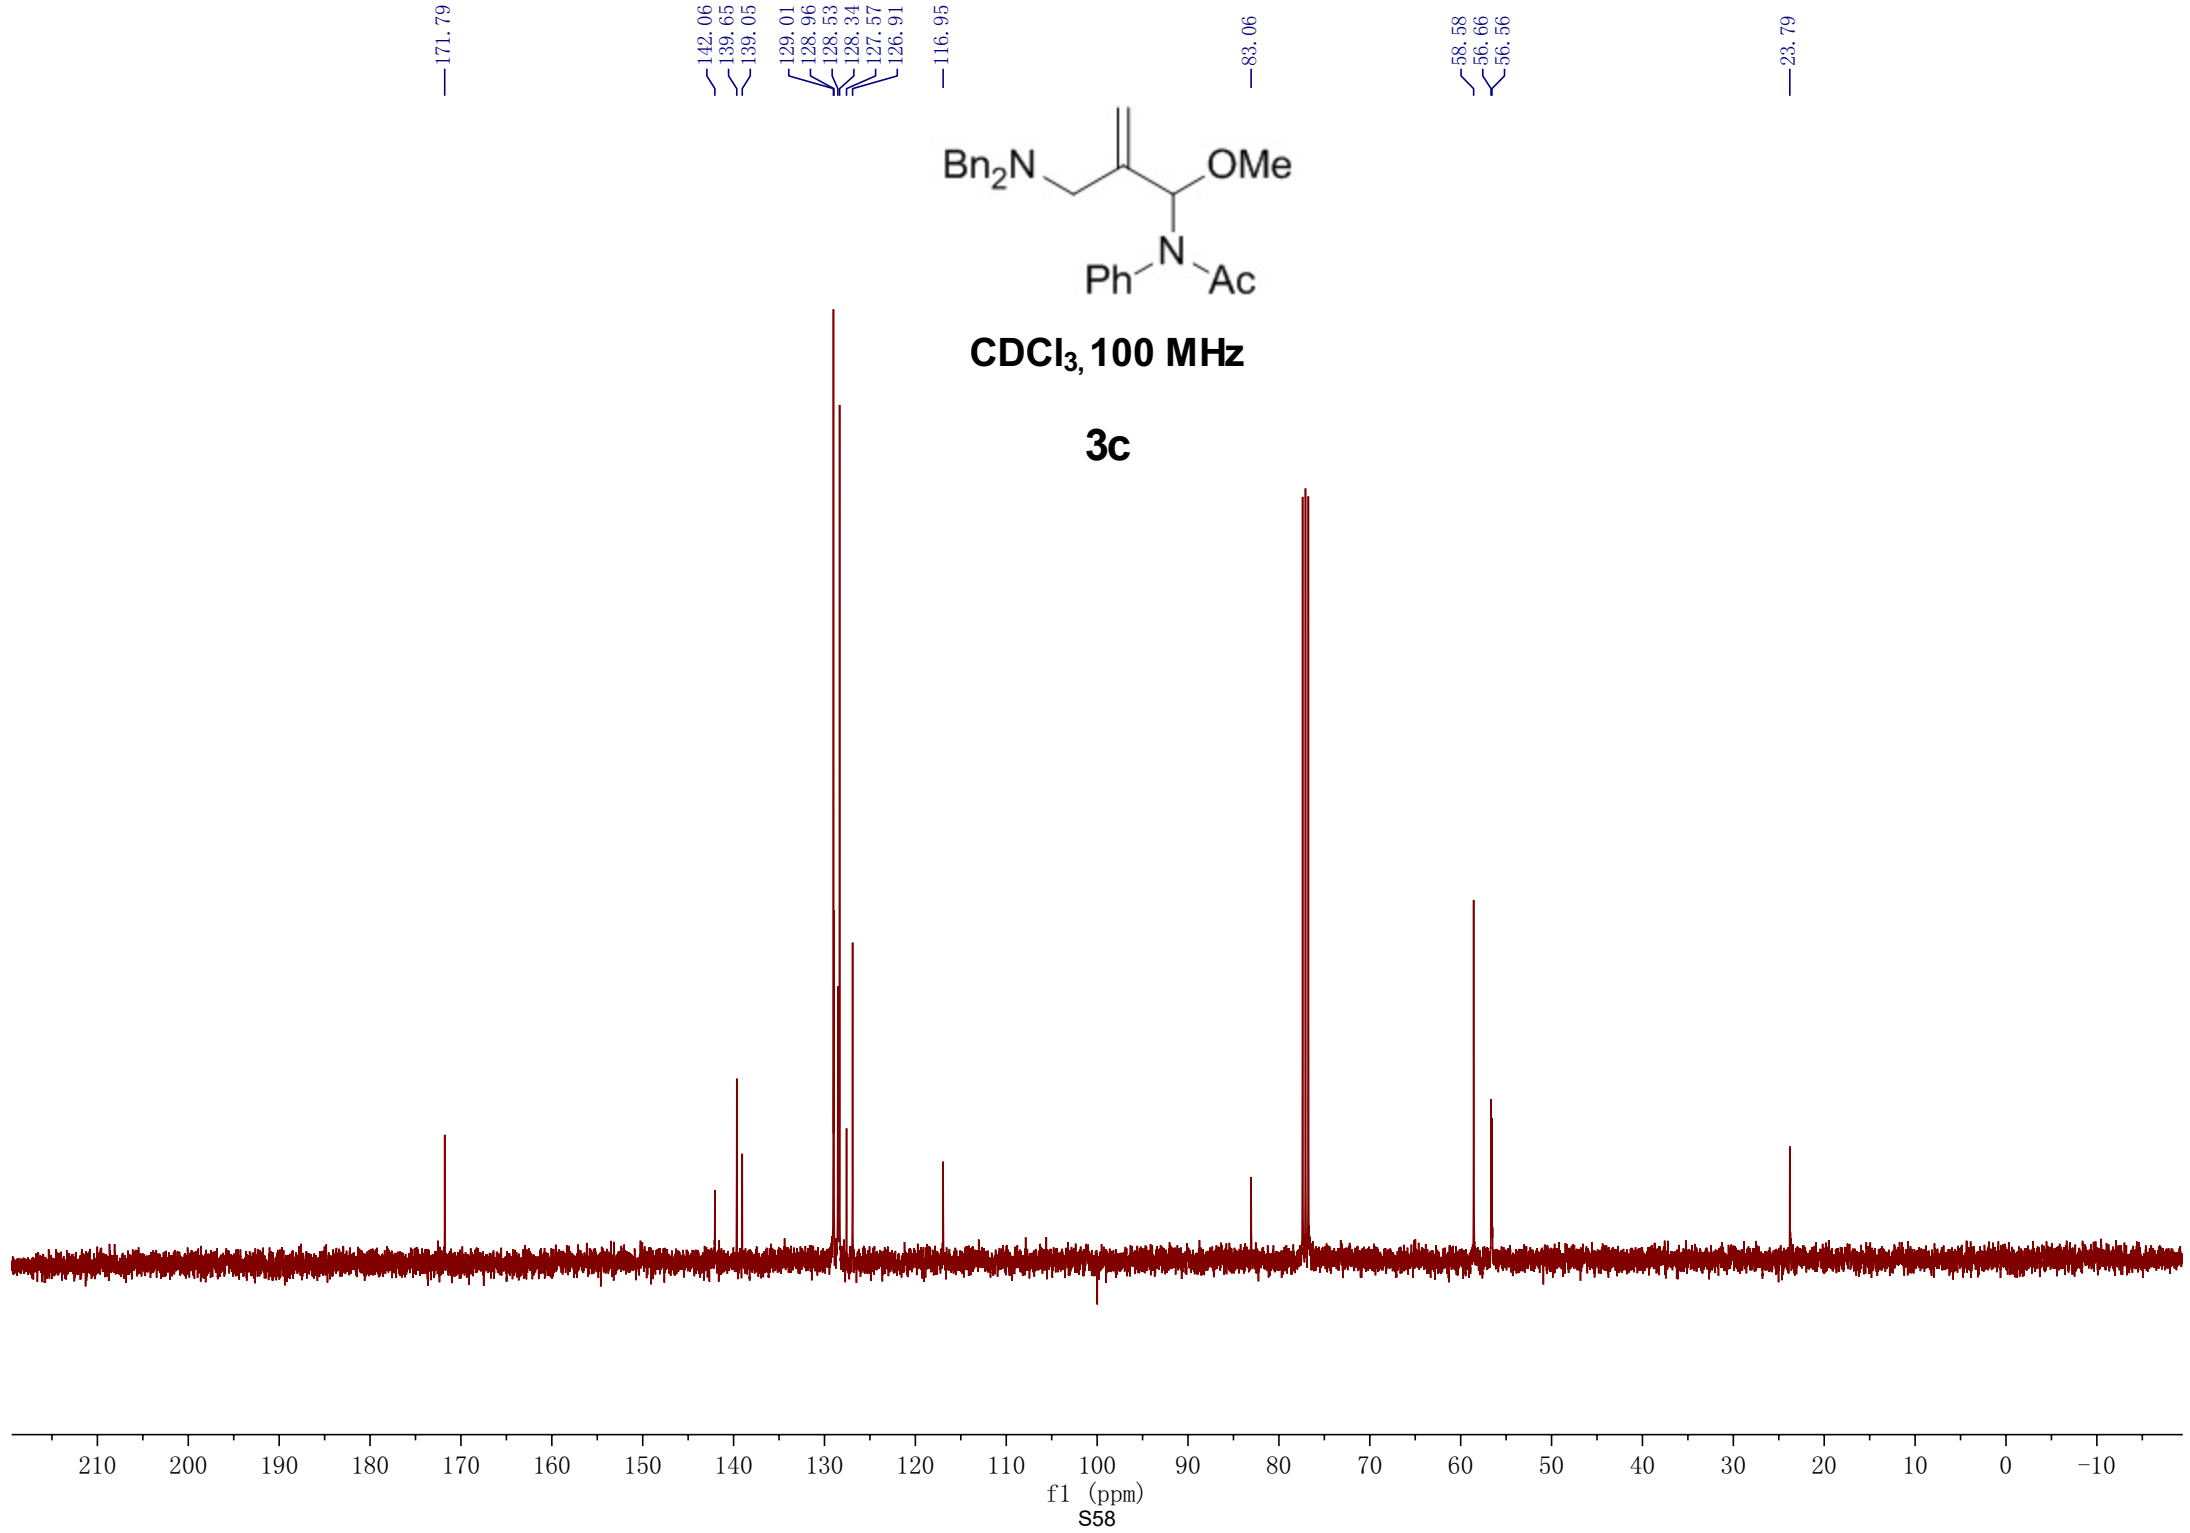

7.43  
7.41  
7.33  
7.31  
7.29  
7.26  
7.24  
7.23  
7.21  
7.19  
7.15  
7.13  
7.11  
7.02  
7.01  
6.99  
6.73  
6.63

5.31

3.74  
3.70  
3.57

3.22  
3.19  
3.06  
3.03

2.70  
2.67

1.65

0.00

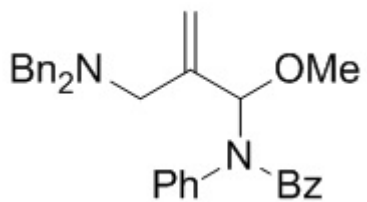

CDCl<sub>3</sub>, 400 MHz

3d

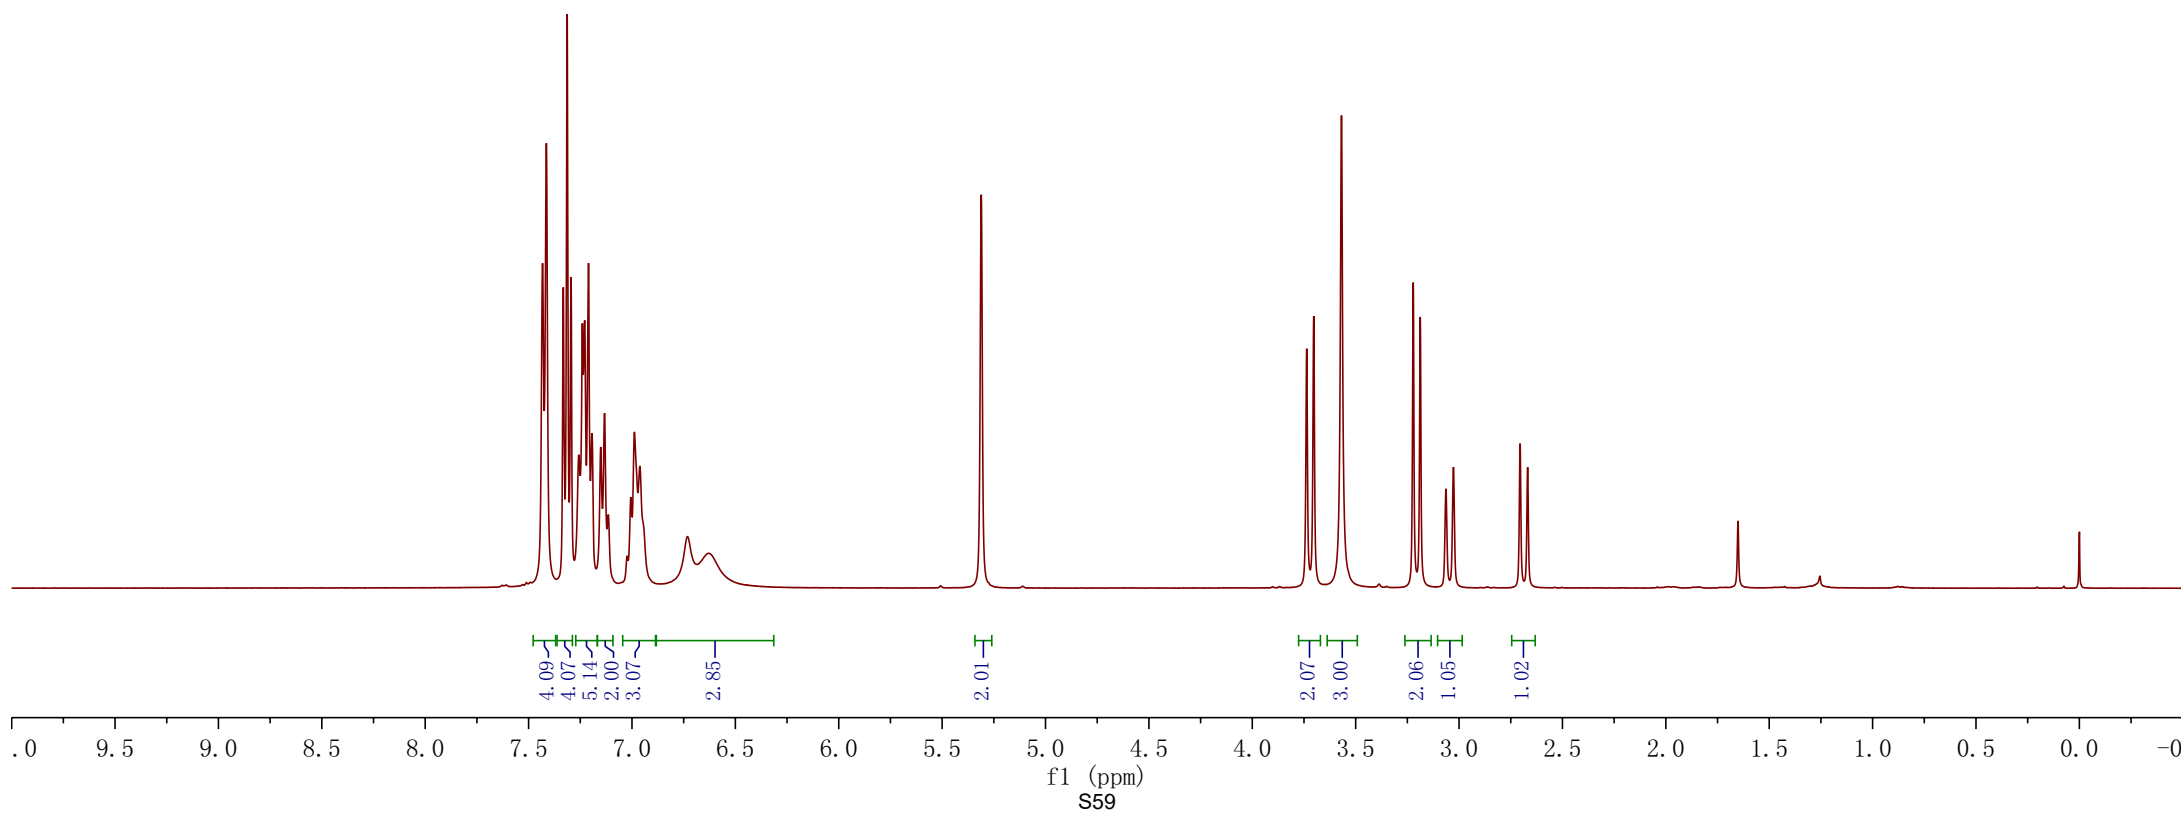

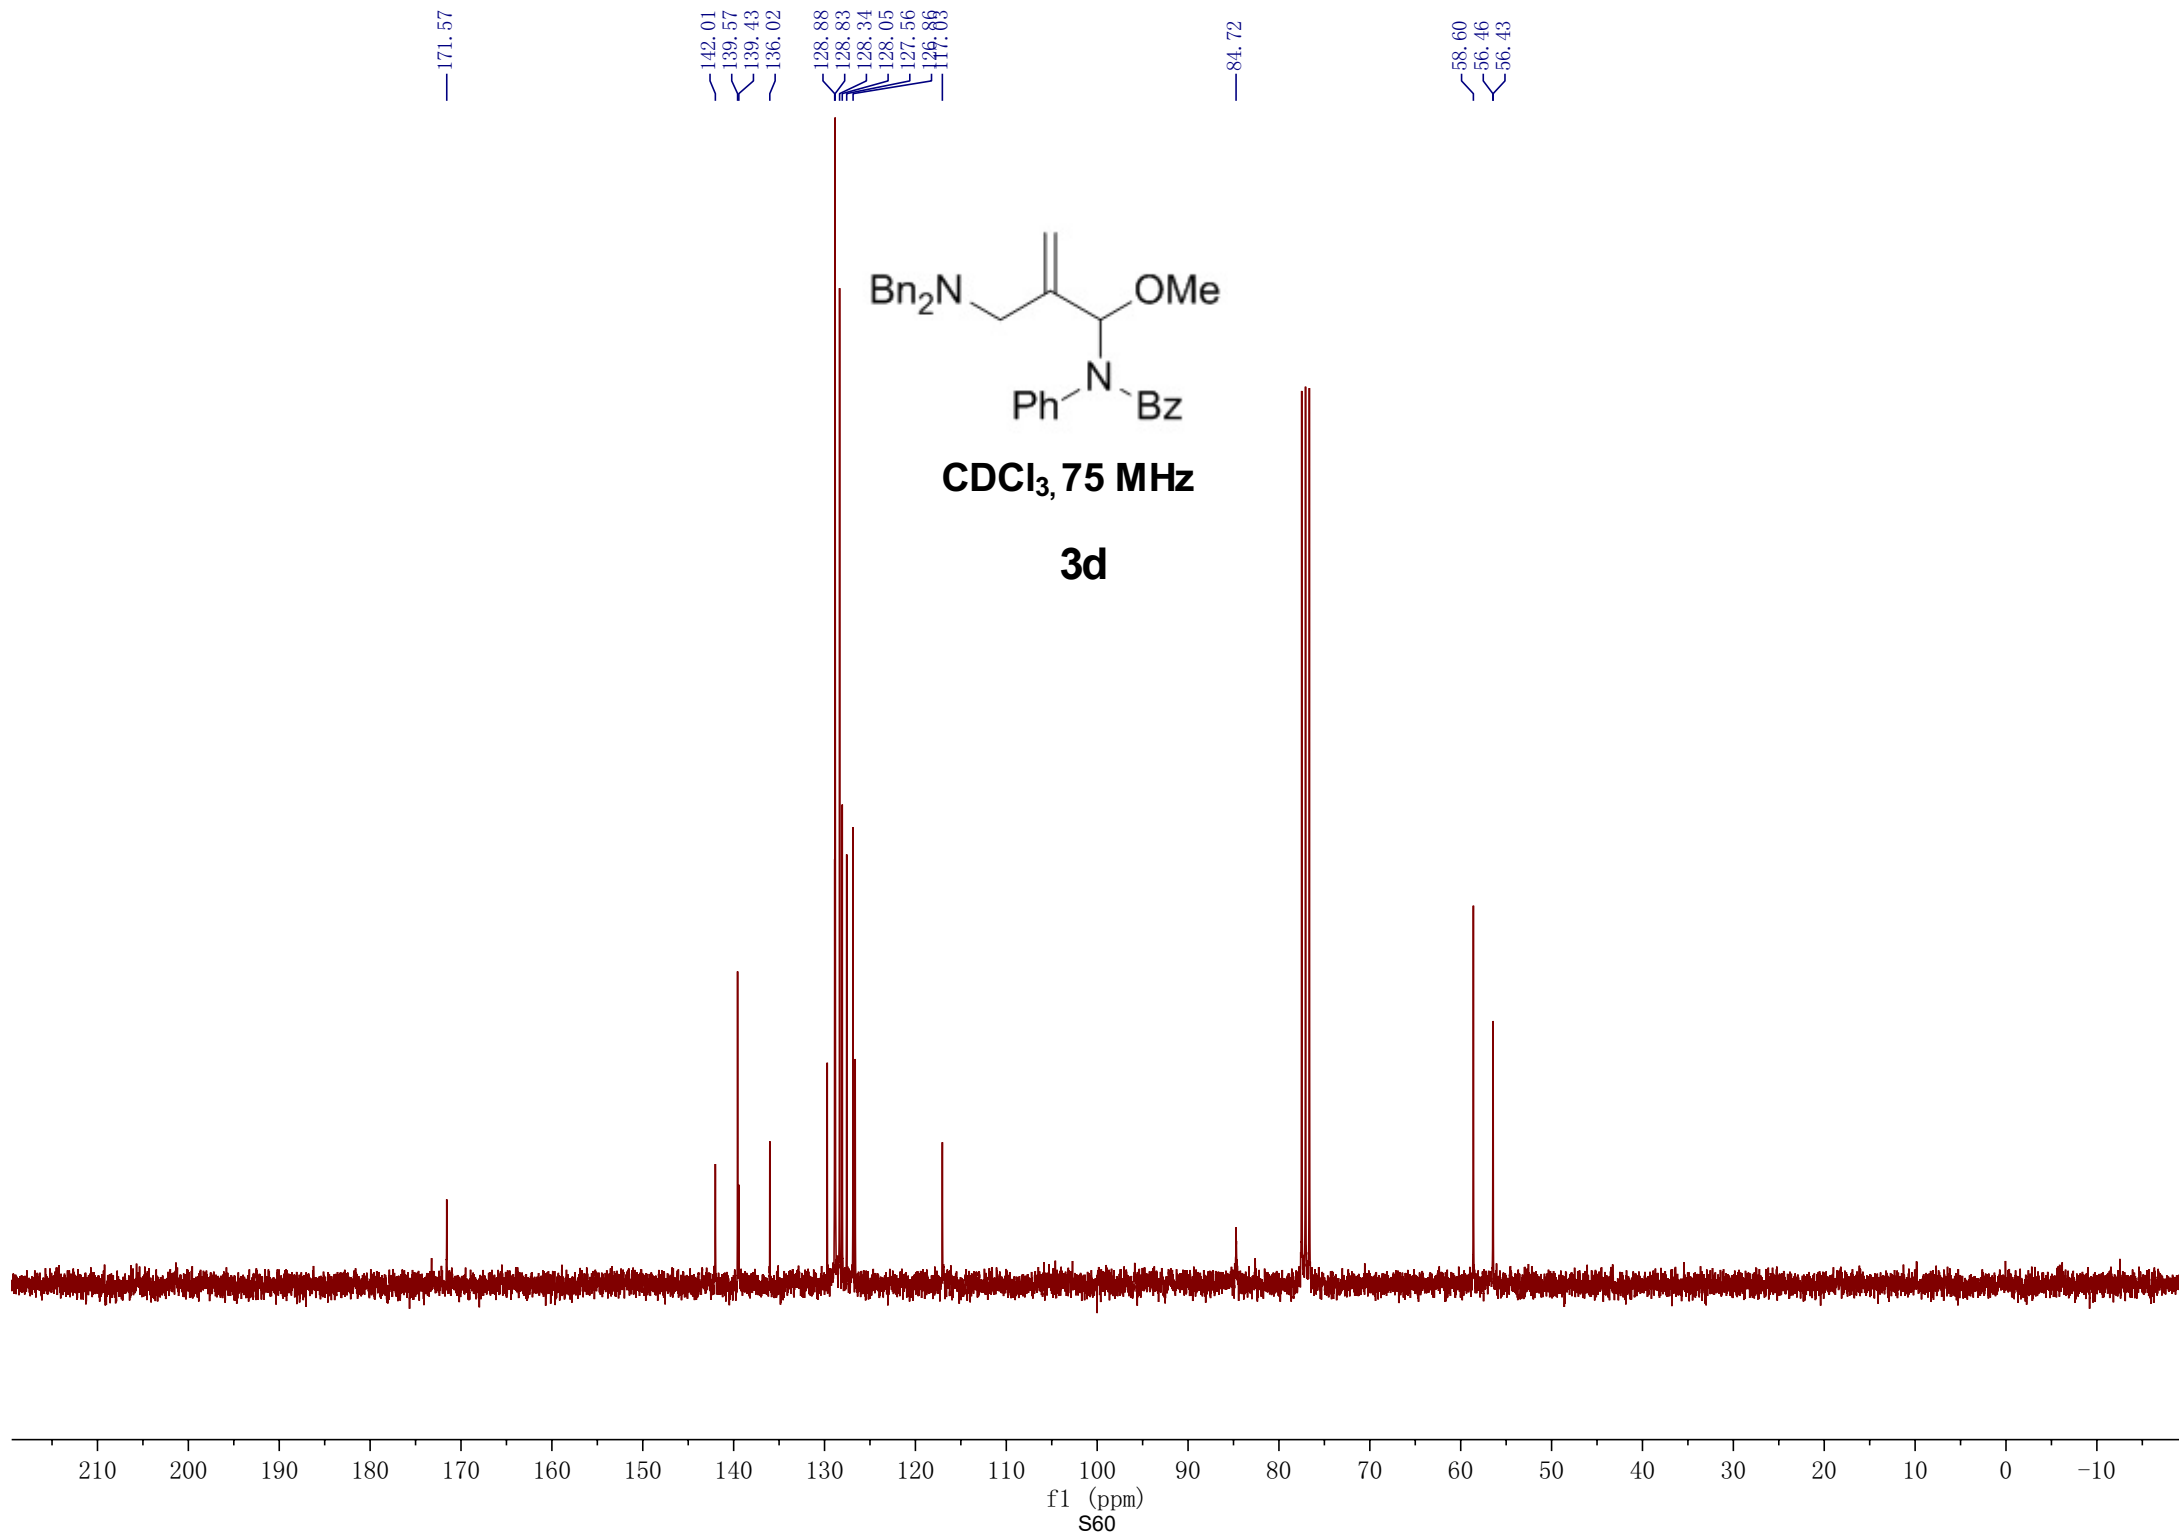

7.63  
7.61  
7.38  
7.37  
7.36  
7.35  
7.33  
7.27  
7.25  
7.24  
7.21  
7.19  
7.10  
7.09  
7.08  
7.07  
7.06  
7.05

5.33

4.19  
4.15  
4.13  
4.09

3.57  
3.54

3.27  
3.23  
3.16

2.82  
2.78

2.53  
2.49  
2.40

1.56

1.26

0.00

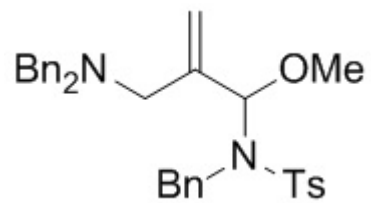

CDCl<sub>3</sub>, 400 MHz

3e

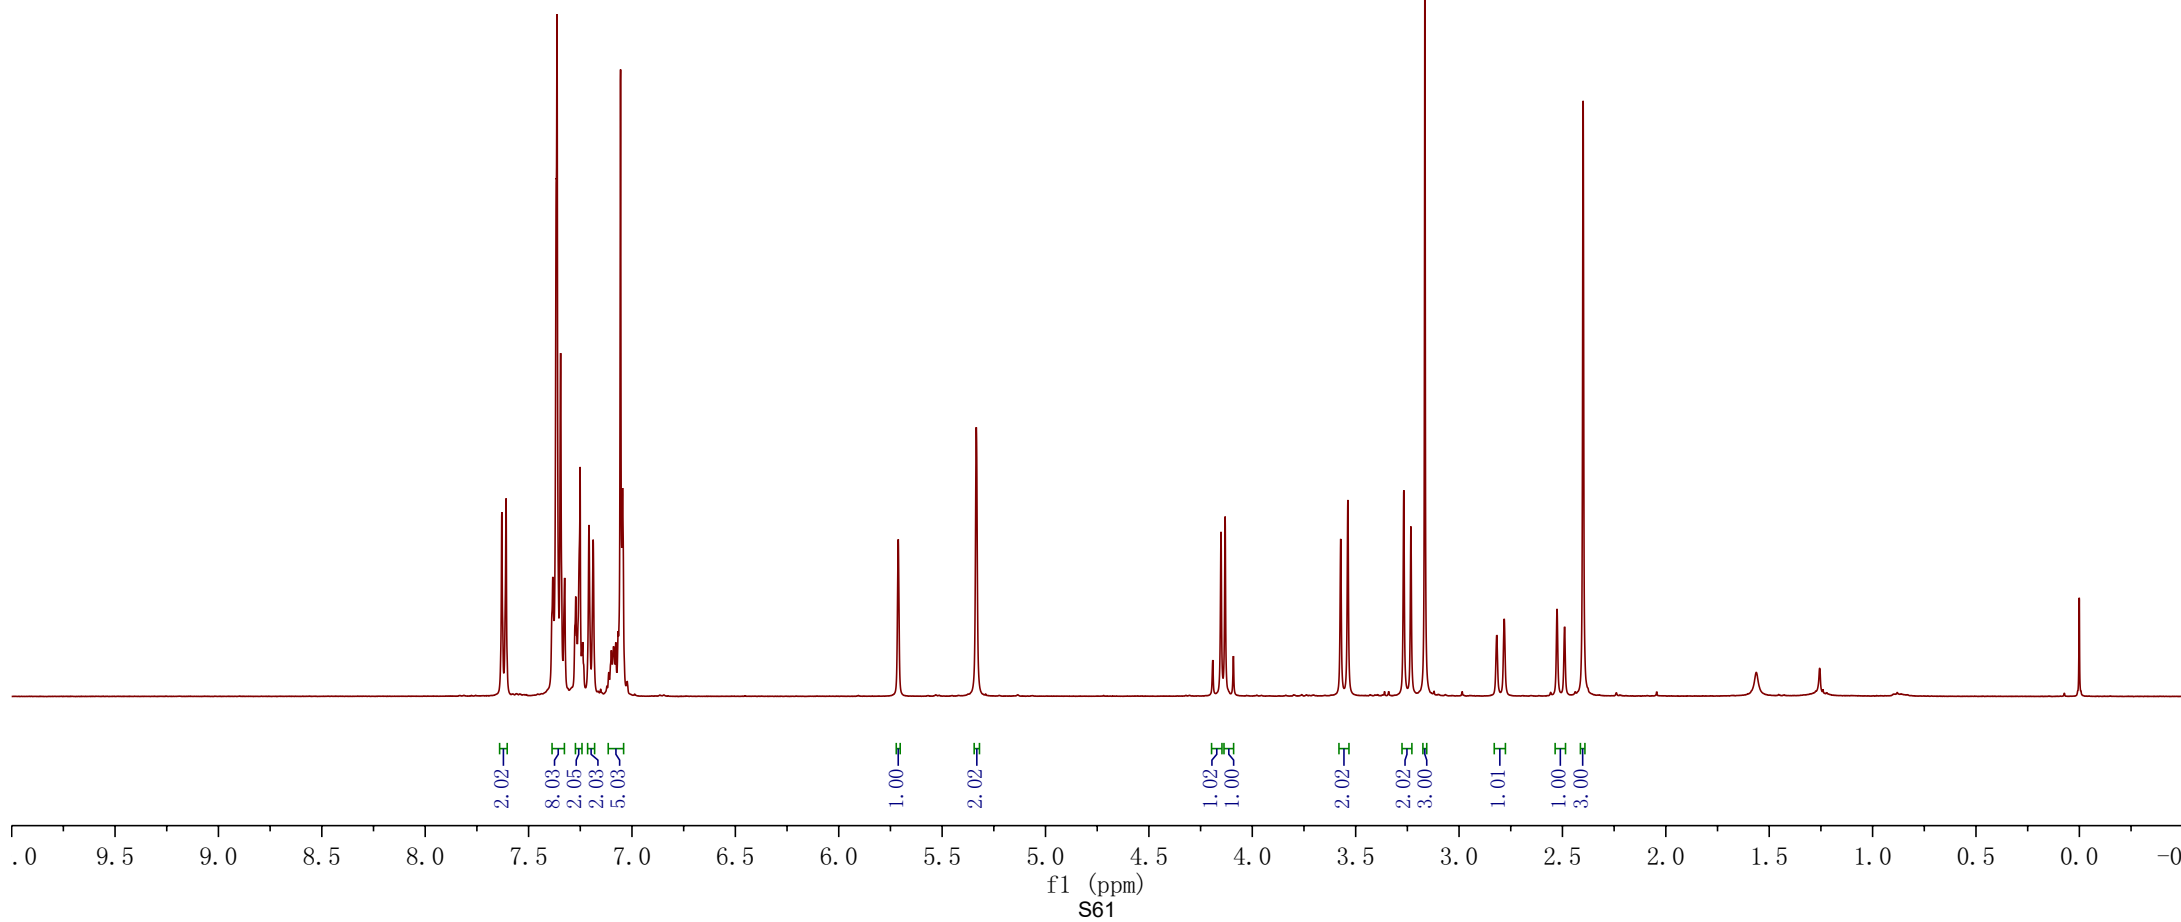

143.25  
141.68  
139.21  
137.53  
137.30  
129.25  
128.67  
128.58  
128.39  
127.89  
116.89  
88.32  
58.02  
56.19  
56.16  
46.54  
21.58

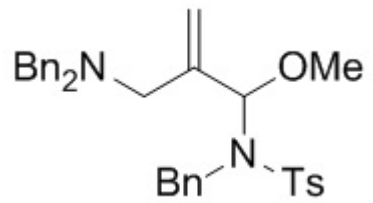

**CDCl<sub>3</sub>, 75 MHz**

**3e**

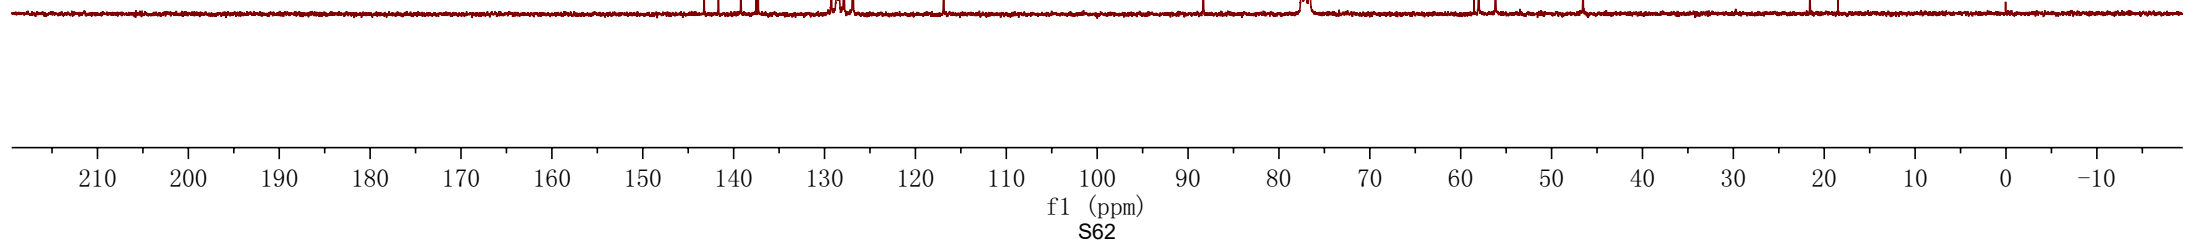



7.68  
7.66  
7.37  
7.35  
7.32  
7.30  
7.29  
7.23  
7.22  
7.21

5.54  
5.49  
5.29

3.56  
3.52  
3.49  
3.46  
3.24  
2.98  
2.97  
2.95  
2.86  
2.79  
2.77  
2.39

1.43  
1.41  
1.40  
1.38  
1.37  
1.31  
1.29  
1.28  
1.26  
1.09  
1.07  
1.05  
0.98  
0.76  
0.74

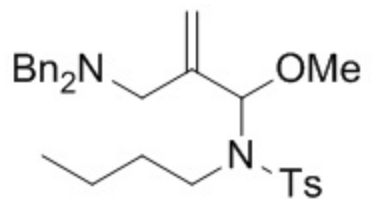

CDCl<sub>3</sub>, 400 MHz

3f

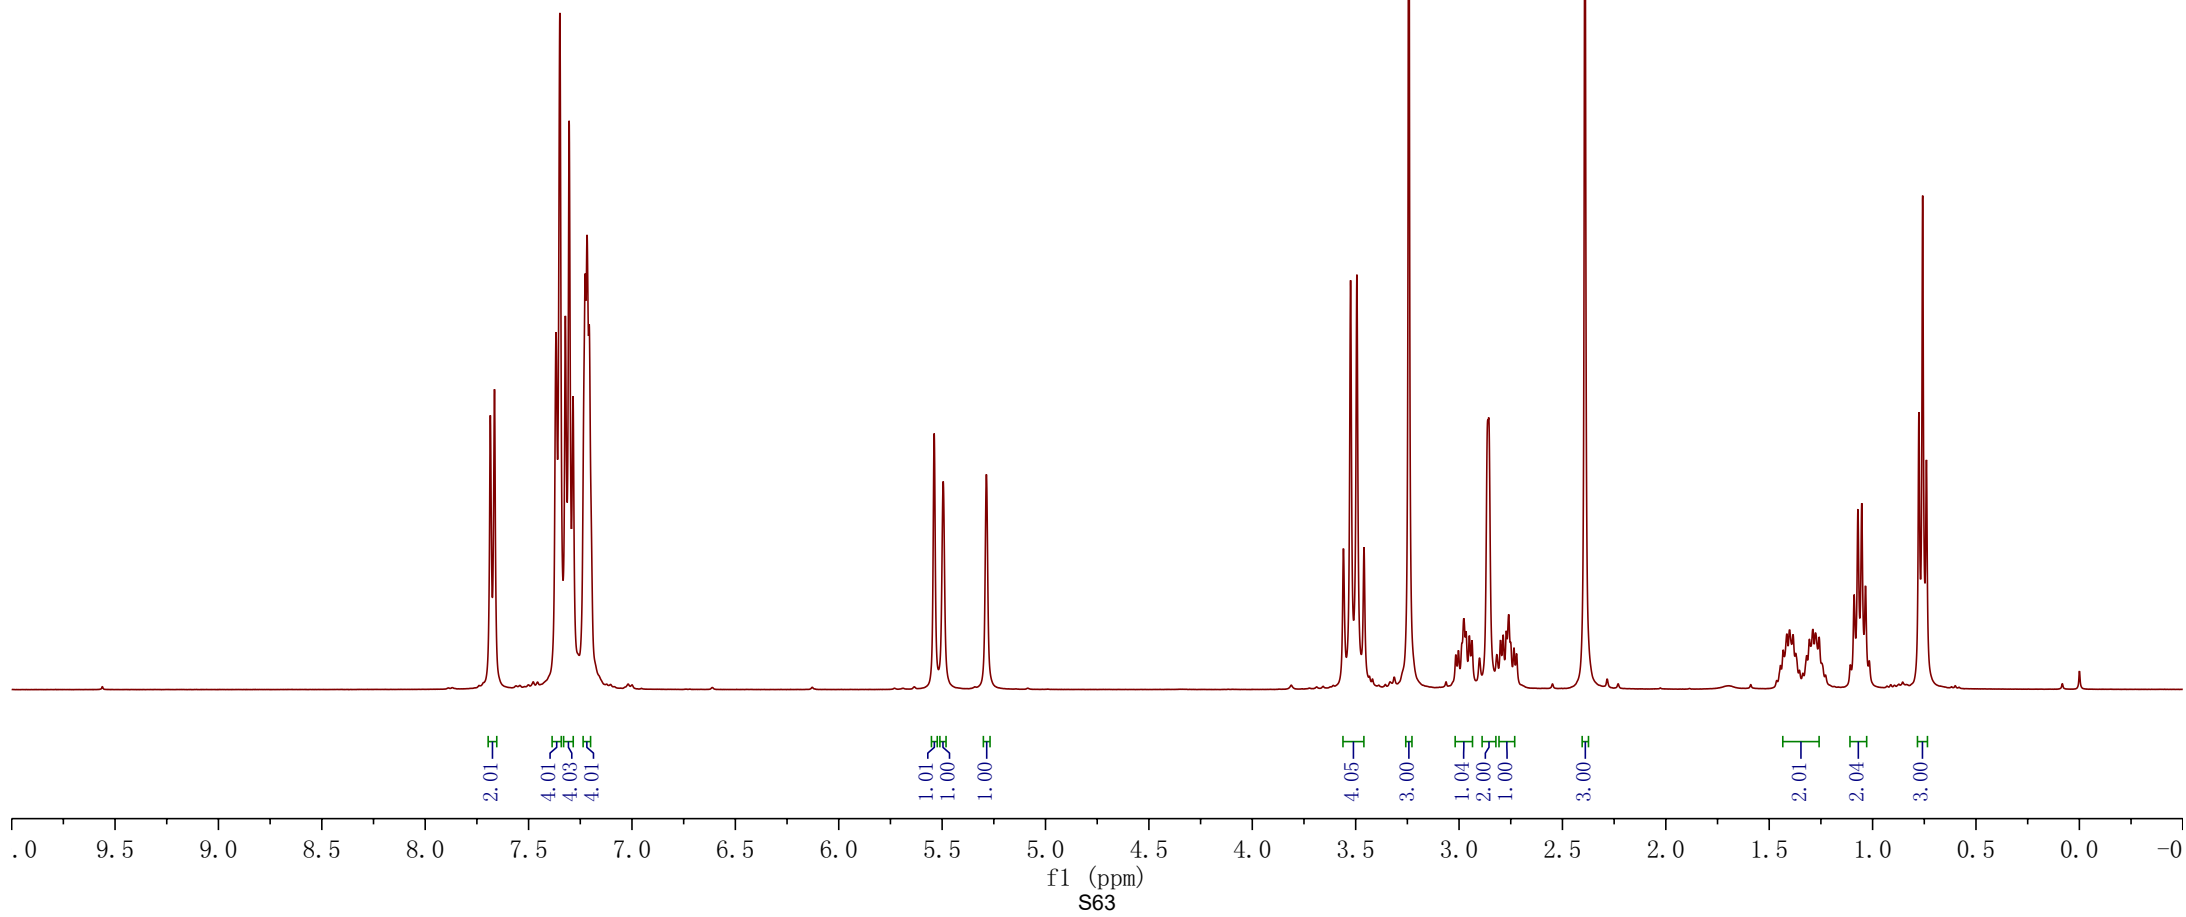

143.20  
142.04  
139.18  
137.75  
129.43  
128.71  
128.34  
127.63  
126.97

115.42

88.35

58.09  
56.17  
56.10

43.17

32.08

21.59  
20.31

13.64

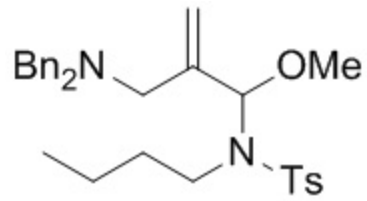

CDCl<sub>3</sub>, 100 MHz

3f

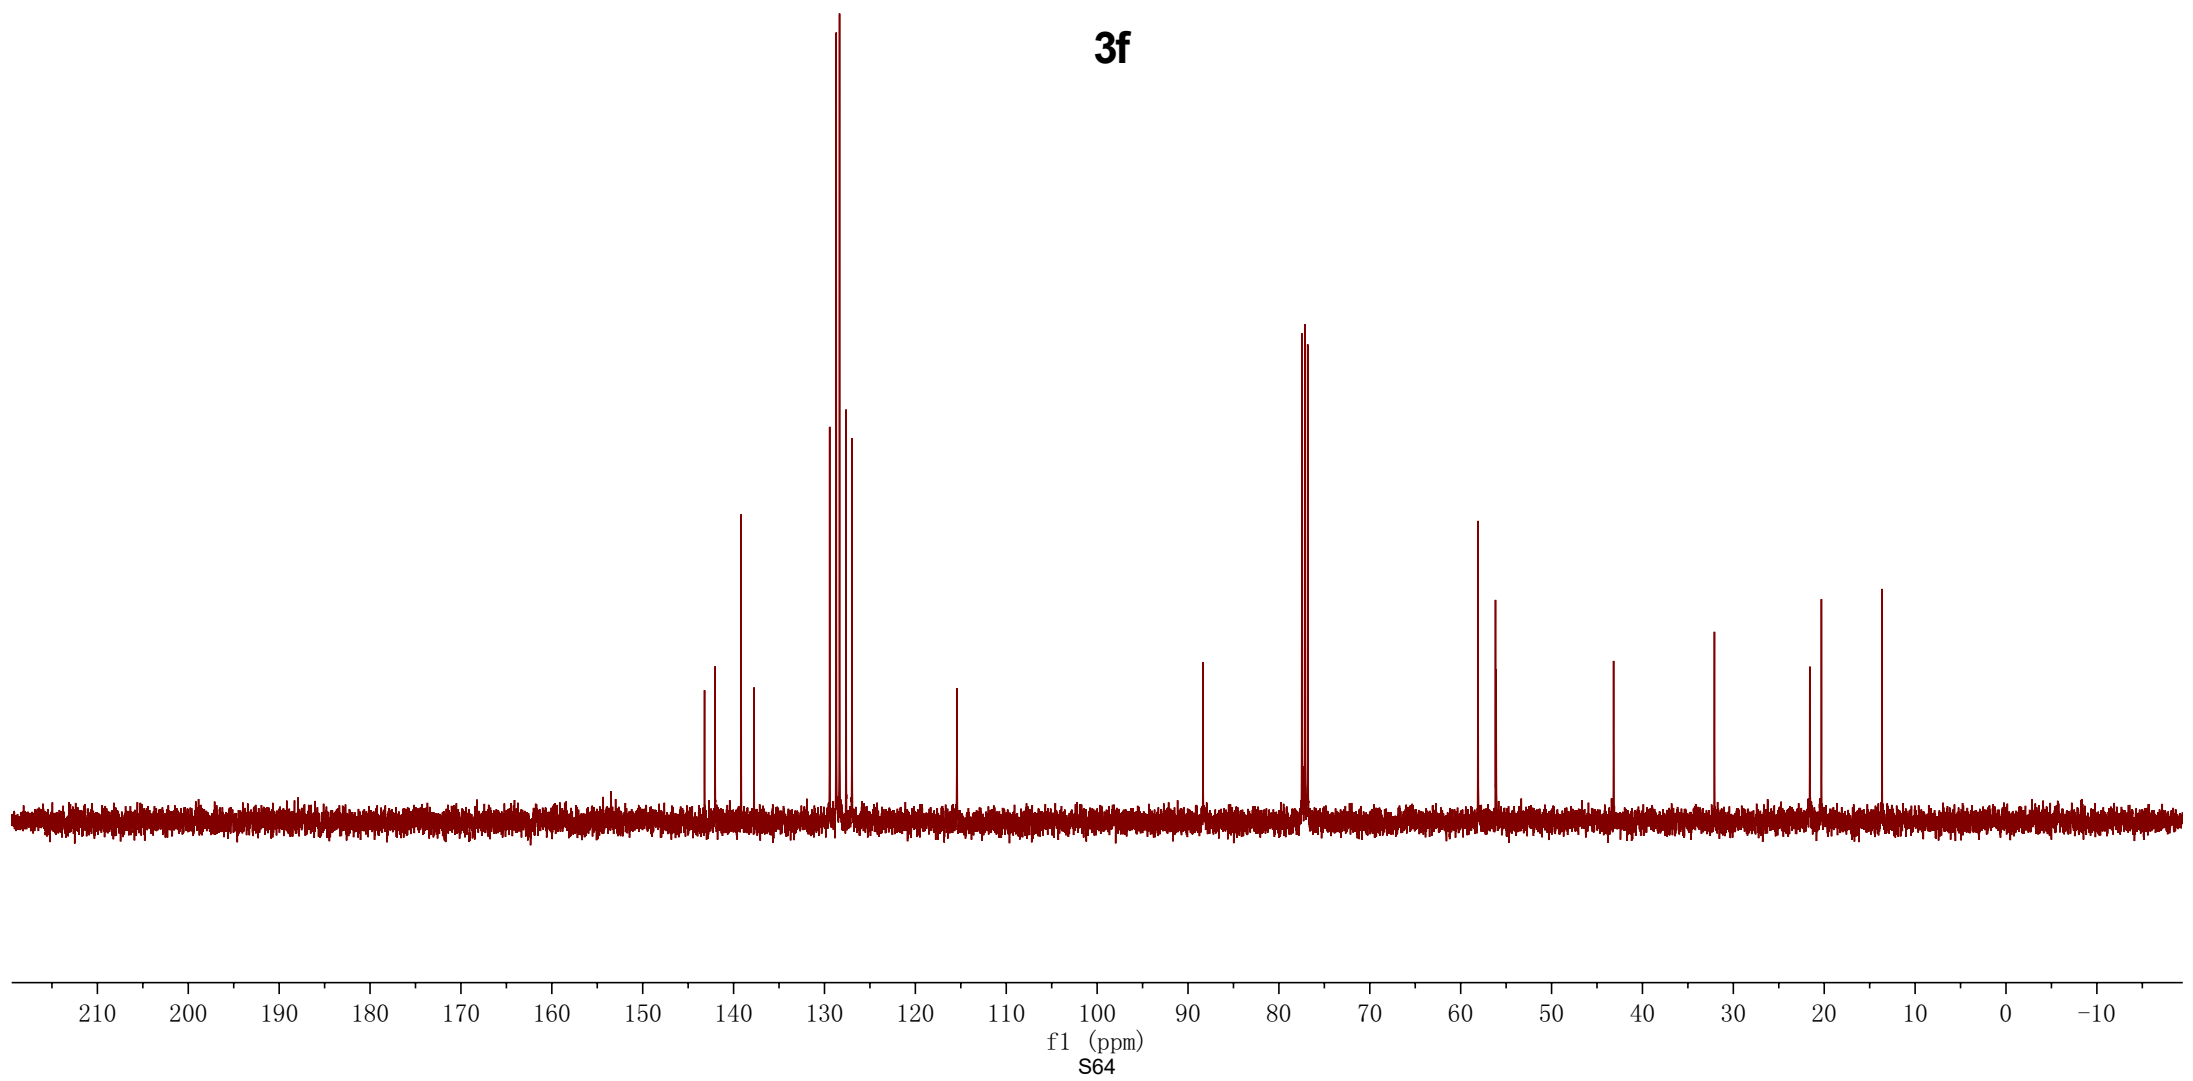

7.708  
7.700  
7.687  
7.679  
7.434  
7.429  
7.413  
7.409  
7.402  
7.384  
7.365  
7.314  
7.309  
7.302  
7.296  
7.292  
7.281  
7.273  
7.261  
7.252  
5.597  
5.590  
5.465  
5.459  
5.455  
5.273  
5.266

3.603  
3.568  
3.550  
3.545  
3.515  
3.511  
3.232  
3.223  
2.982  
2.960  
2.953  
2.942  
2.924  
2.917  
2.904  
2.833  
2.819  
2.796  
2.783  
2.739  
2.717  
2.700  
2.679  
2.463  
2.460  
1.665  
1.646  
1.626

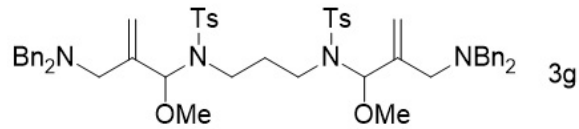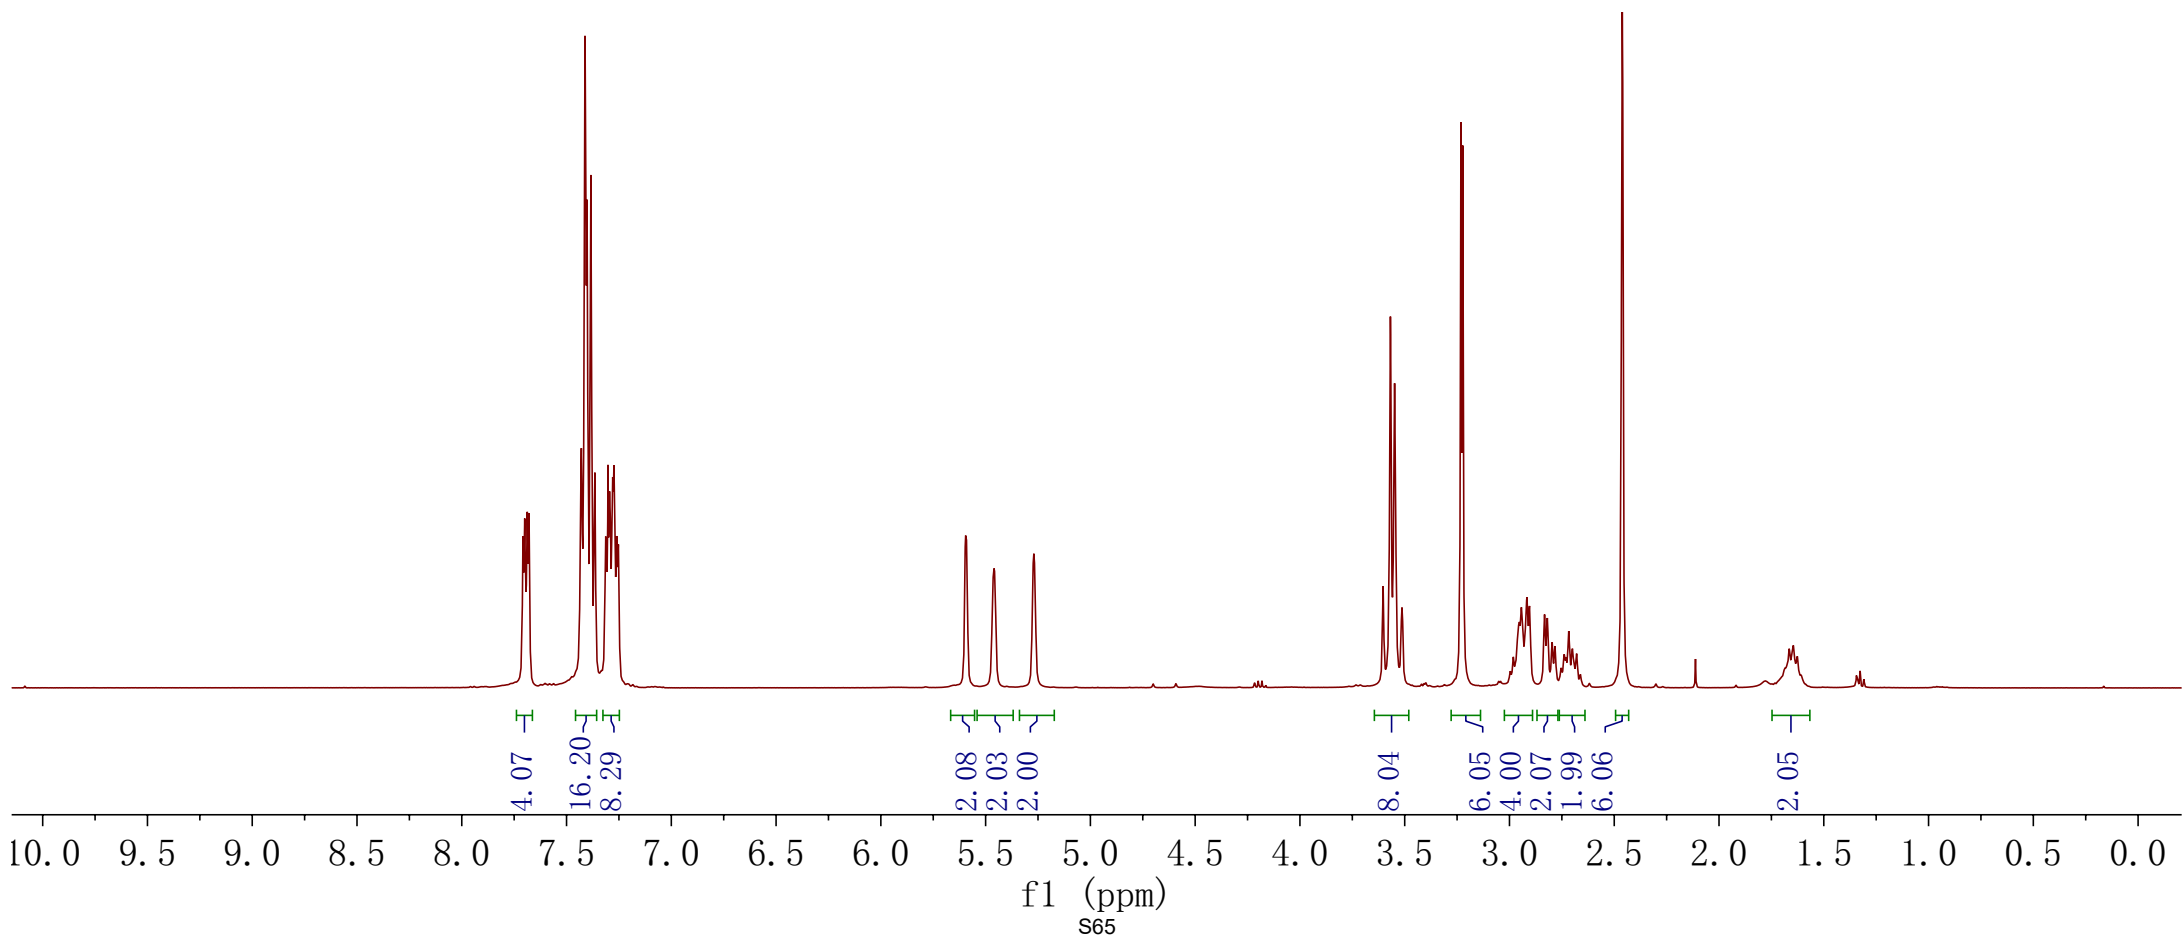

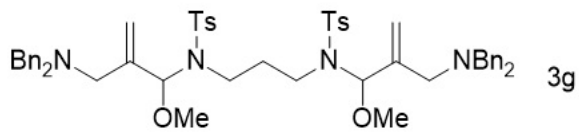

143.253  
141.732  
139.038  
137.584  
137.542  
129.460  
128.737  
128.345  
127.599  
126.969  
116.204  
116.134

—88.111

57.818  
56.110  
56.092

—41.098

—30.334

—21.618

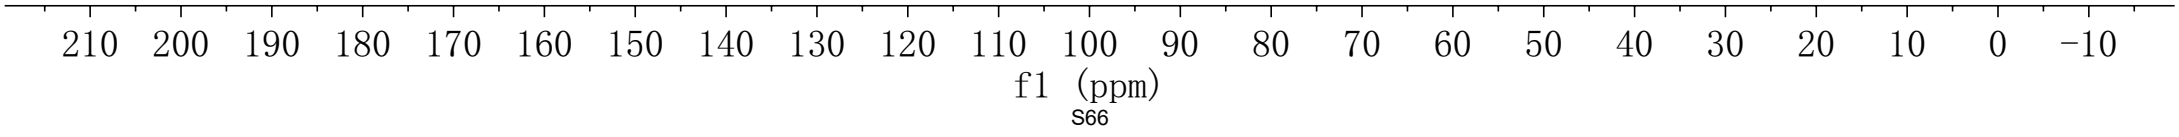

7.41  
7.41  
7.38  
7.33  
7.33  
7.31  
7.30  
7.28  
7.25  
7.24  
7.24  
7.22  
7.21  
7.21  
7.19  
7.19

5.72  
5.46  
5.43

3.73  
3.69  
3.32  
3.28  
3.15  
3.11  
3.00  
2.95  
2.86  
2.79  
2.74  
2.38  
2.35  
2.35  
2.25  
2.23  
1.86  
1.85  
1.83  
1.53  
1.52  
1.50  
1.49  
1.46

-0.00

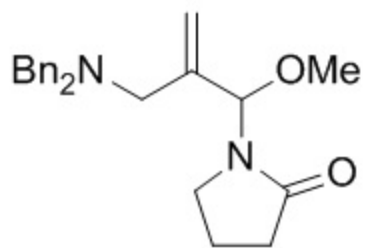

CDCl<sub>3</sub>, 300 MHz

3h

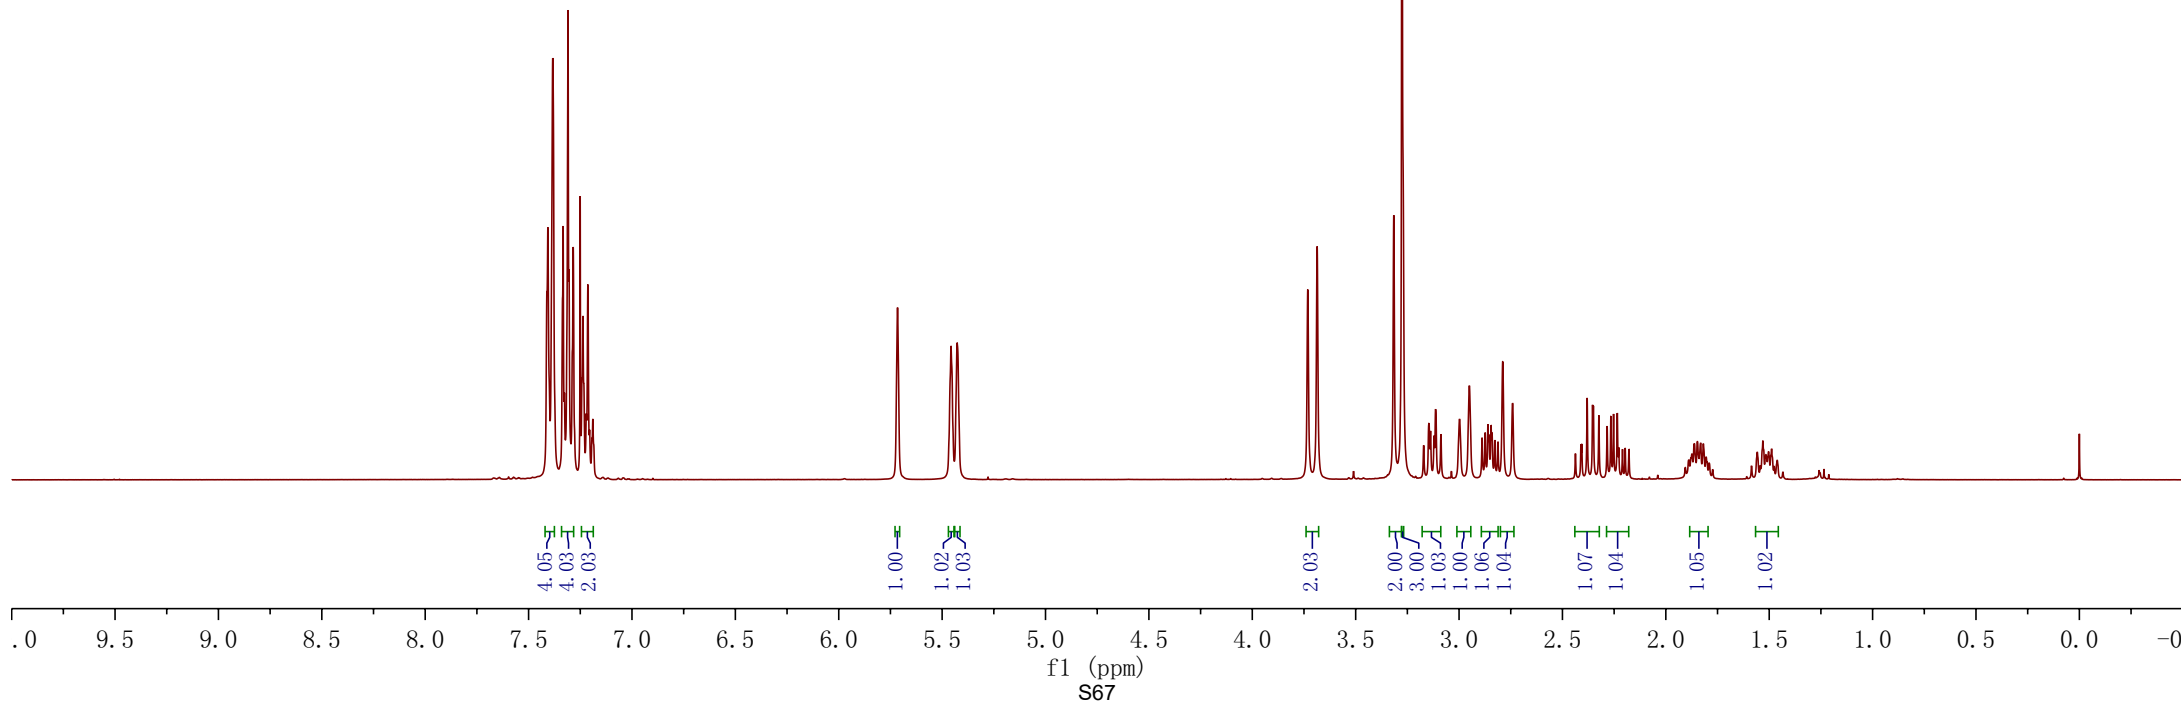

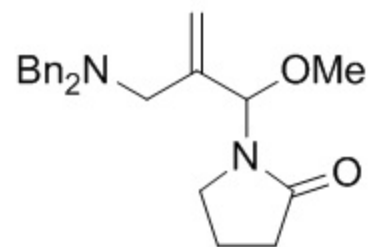

CDCl<sub>3</sub>, 100 MHz

3h

—176.12

—142.32  
—139.35

128.83  
128.26  
126.88

—115.45

—80.85

58.45  
56.36  
55.88

—41.50

—31.68

—18.09

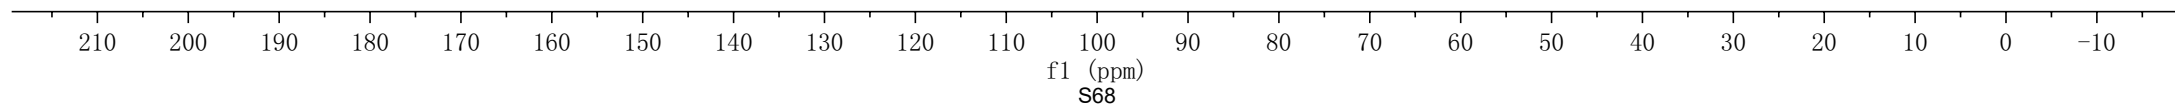

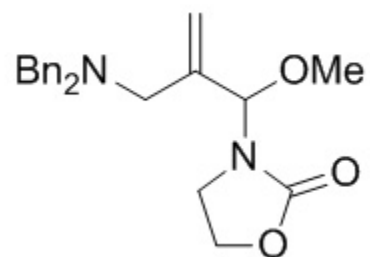

CDCl<sub>3</sub>, 400 MHz

3i

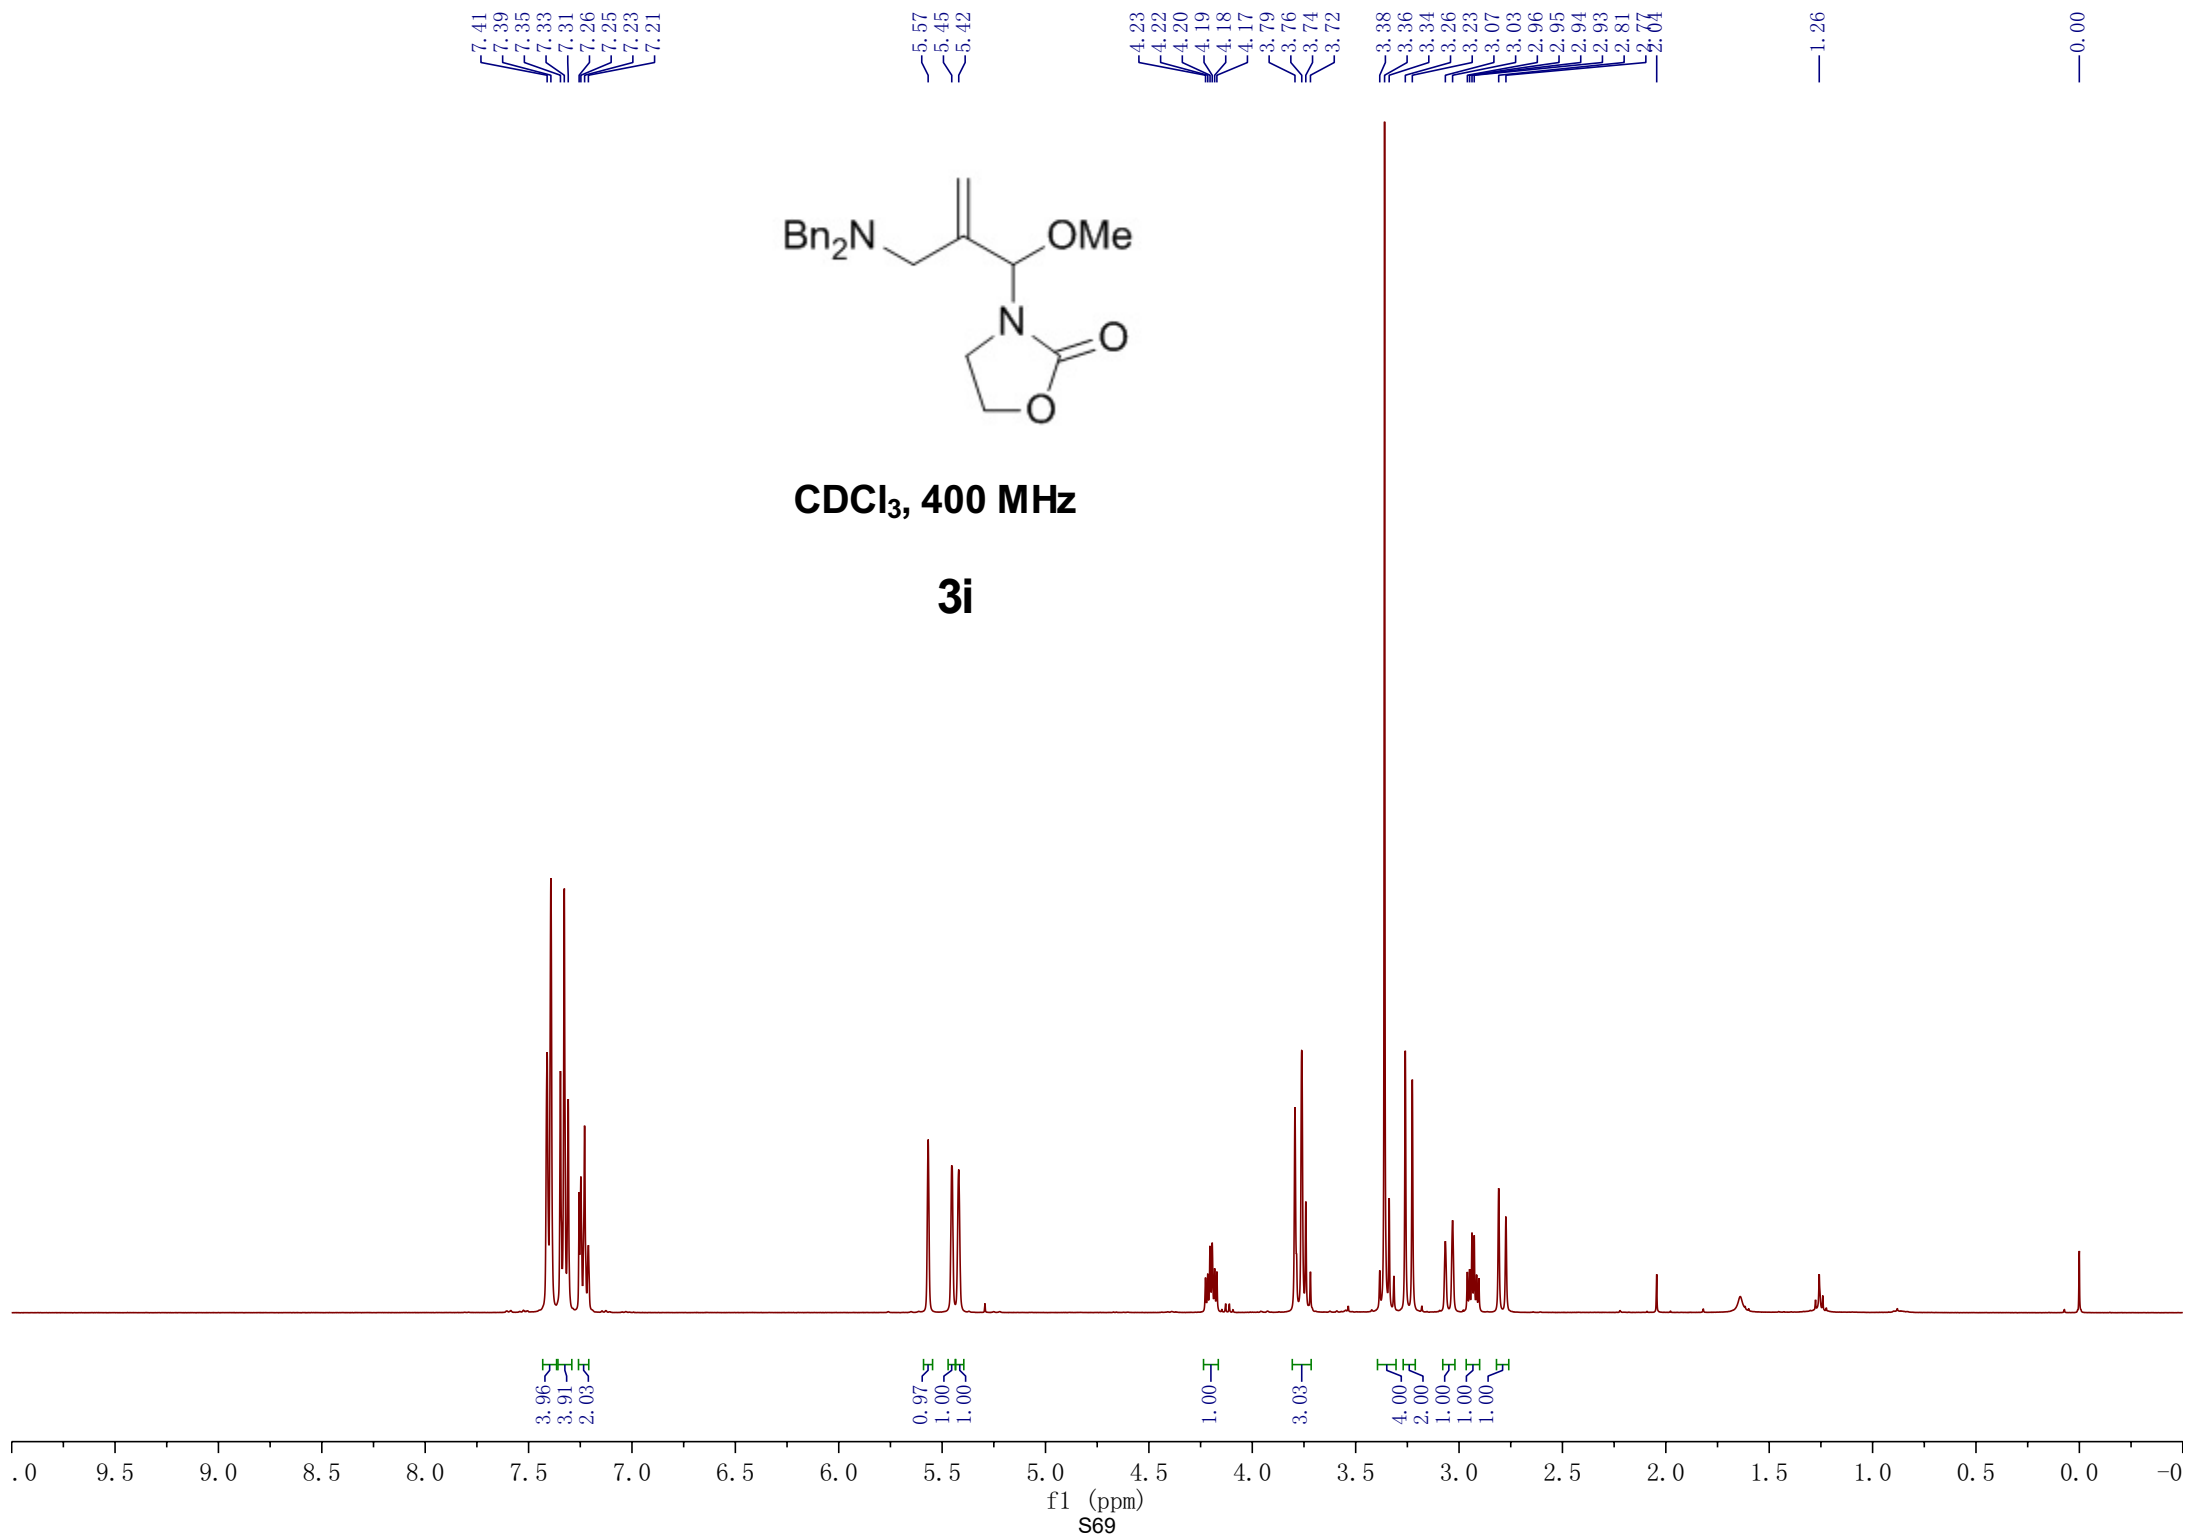

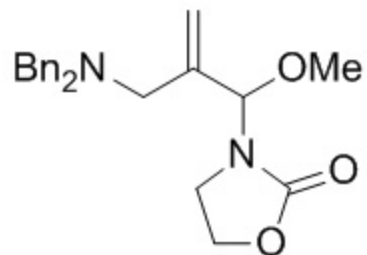

CDCl<sub>3</sub>, 100 MHz

**3i**

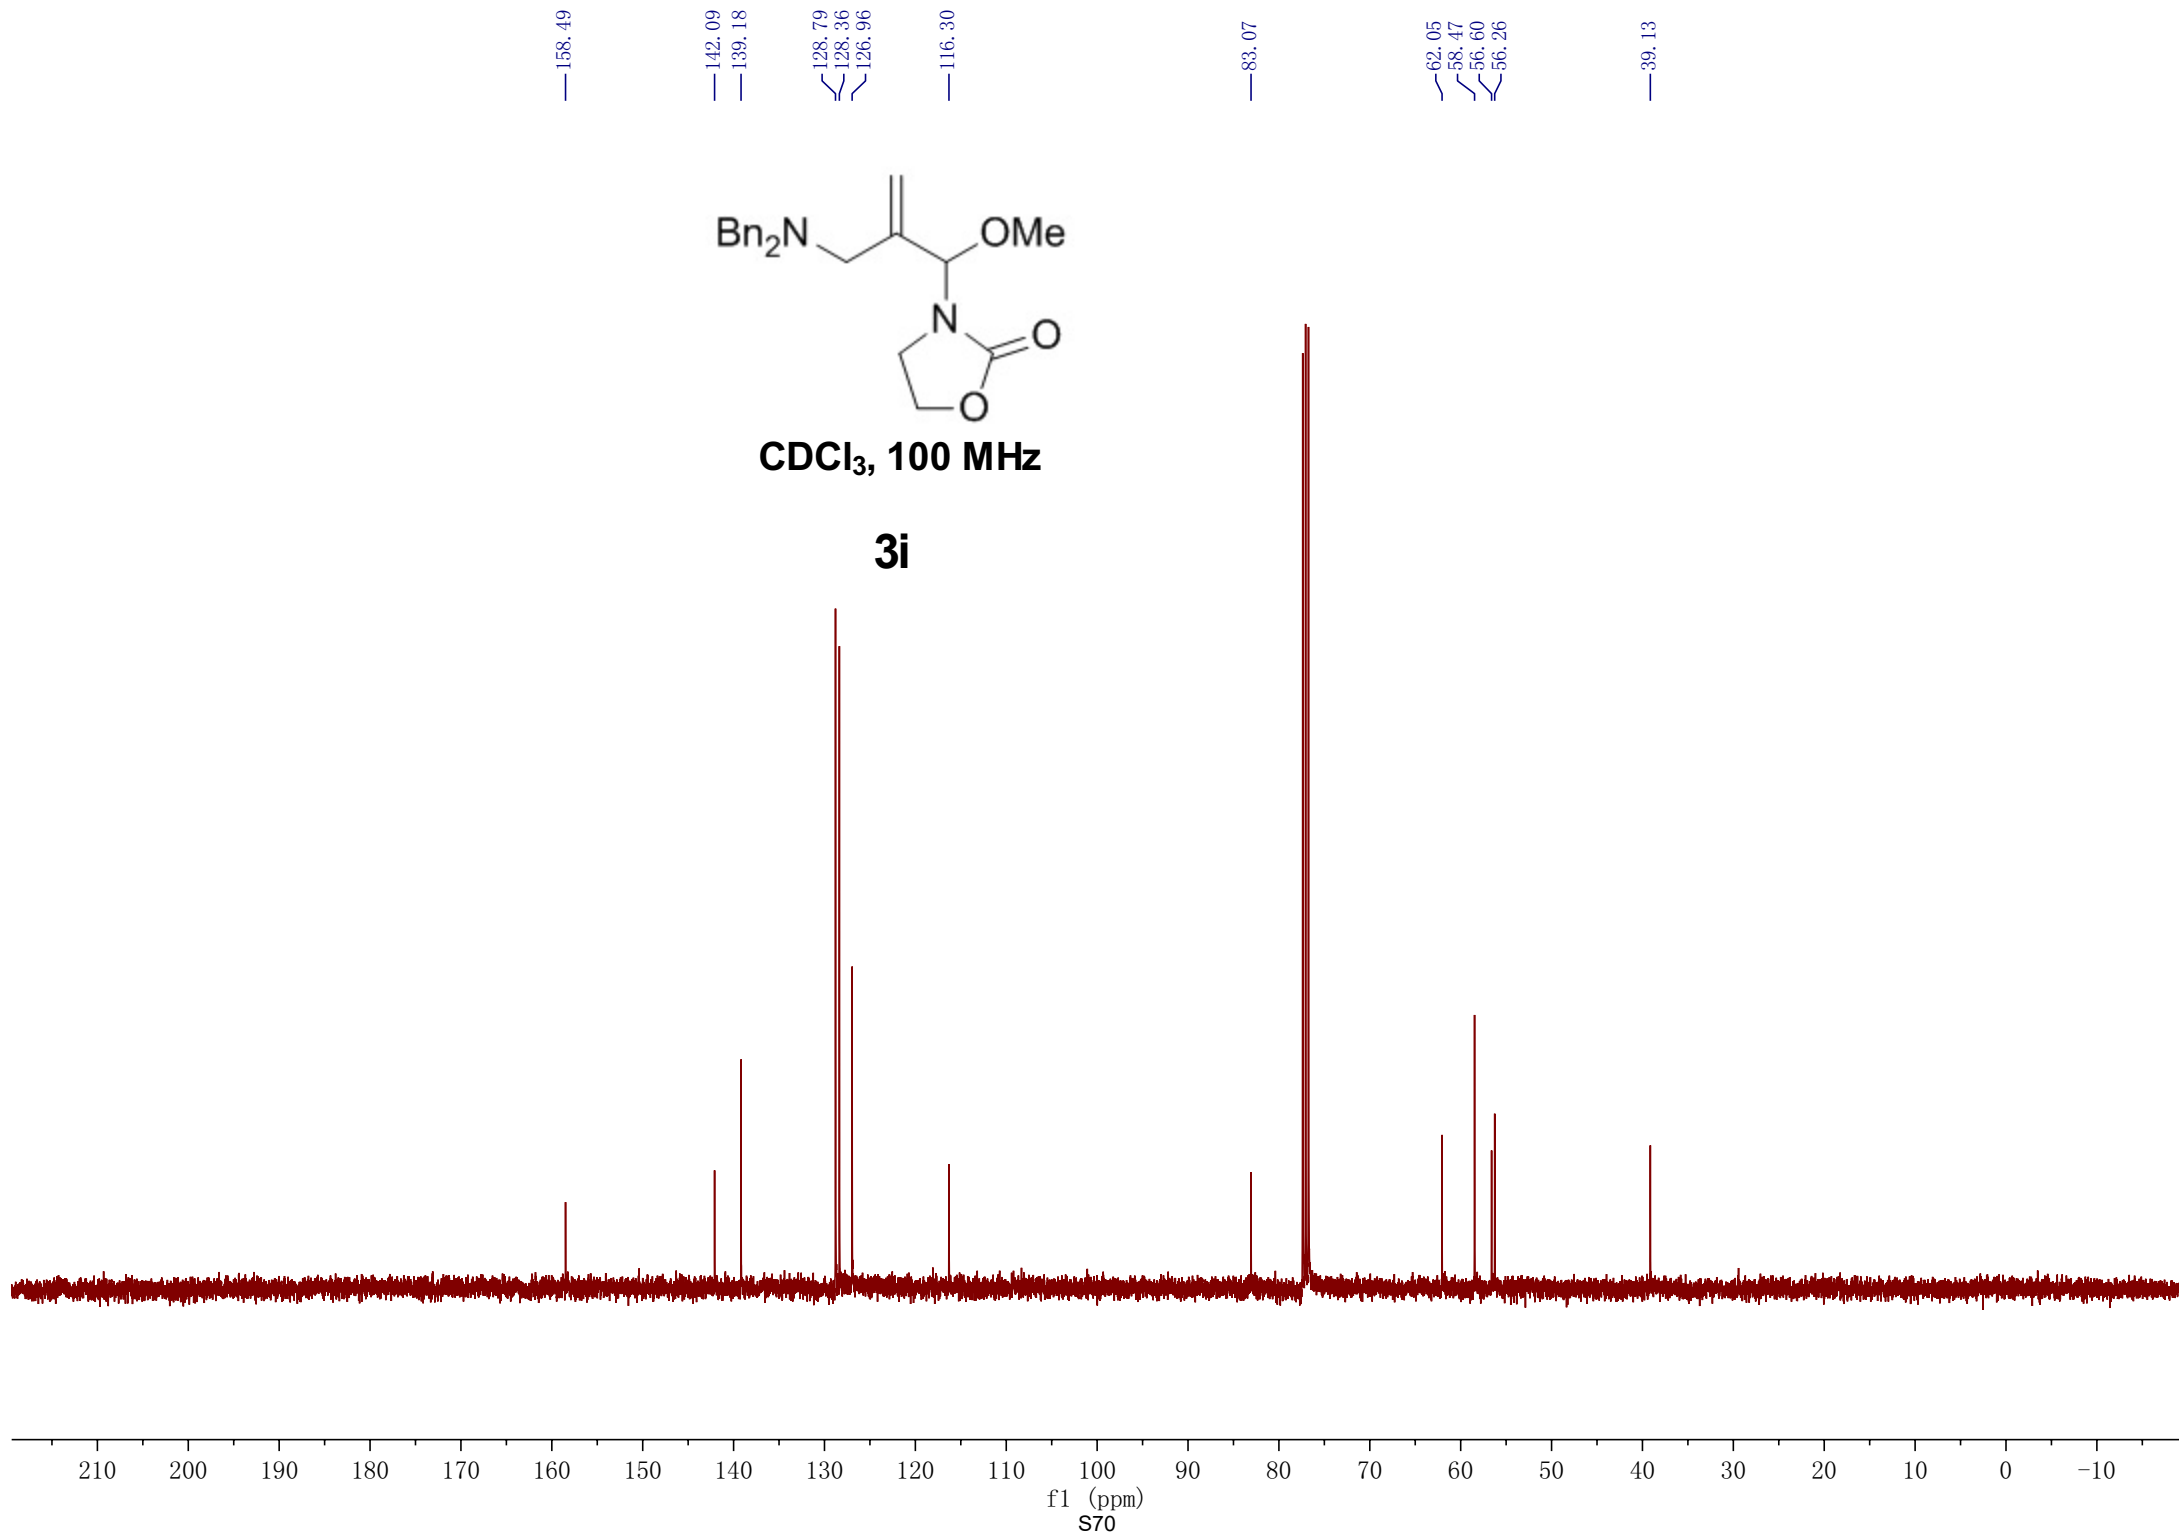



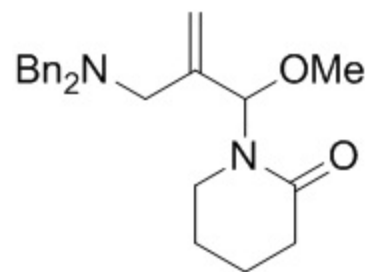

CDCl<sub>3</sub>, 400 MHz

3j

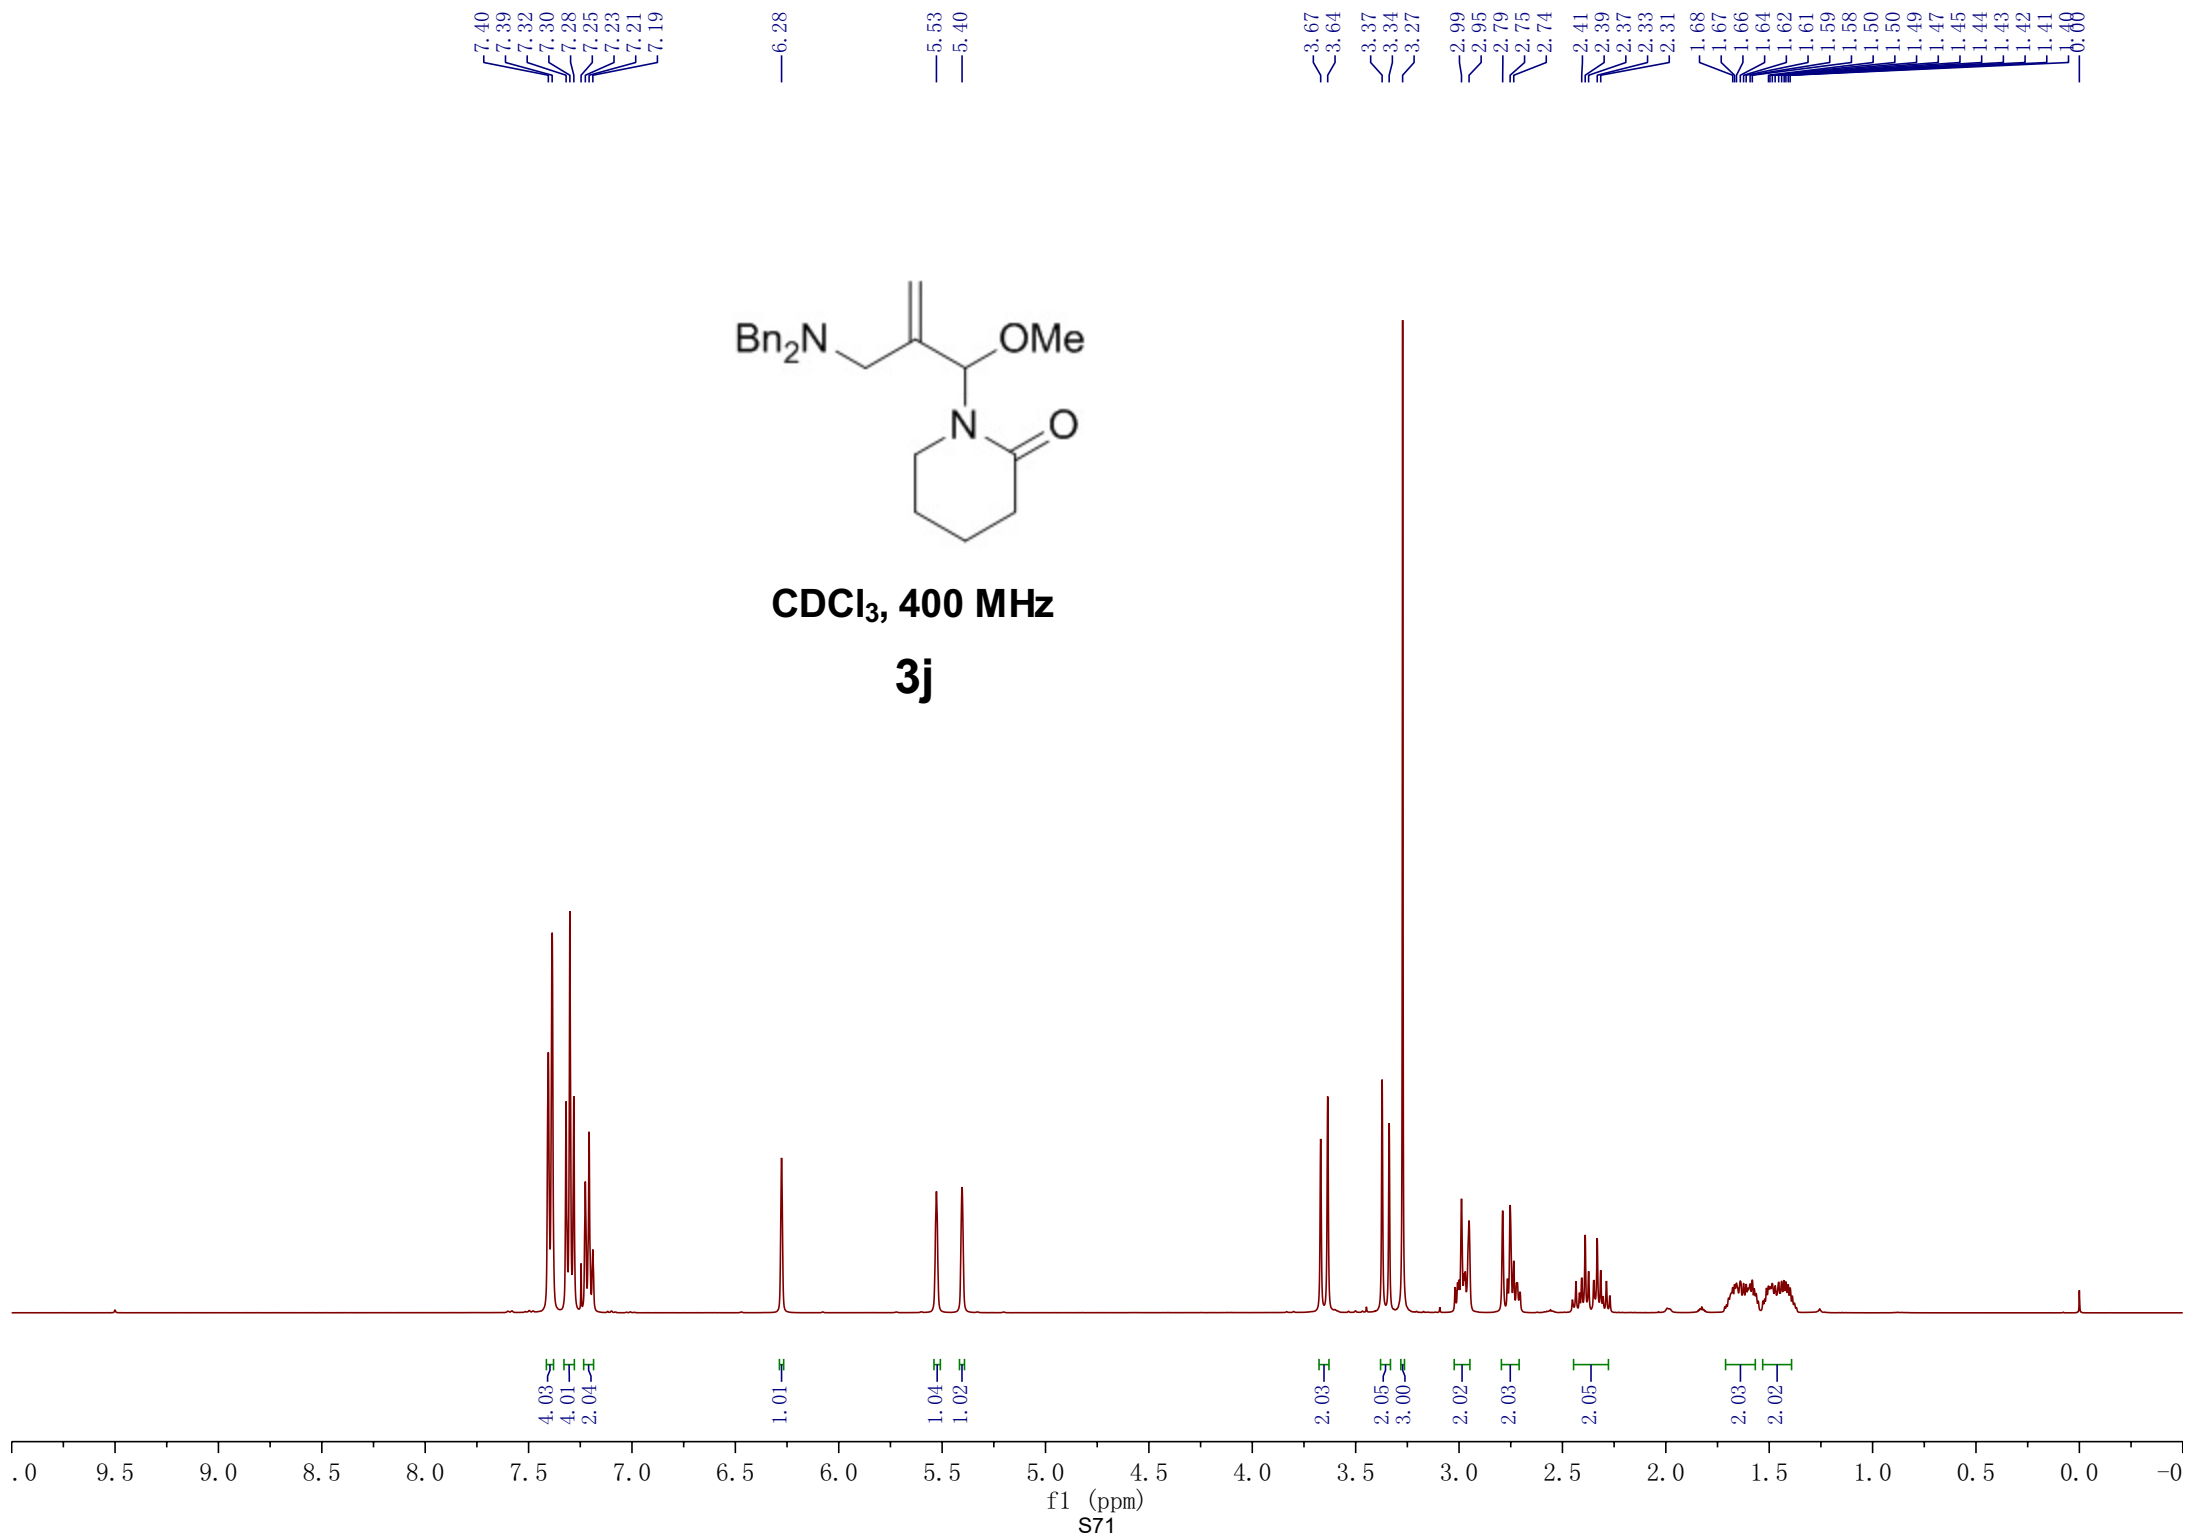

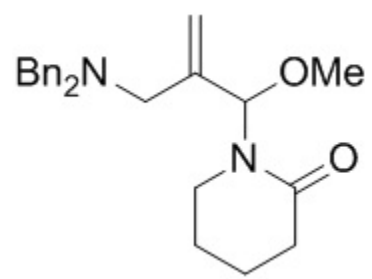

CDCl<sub>3</sub>, 75 MHz

**3j**

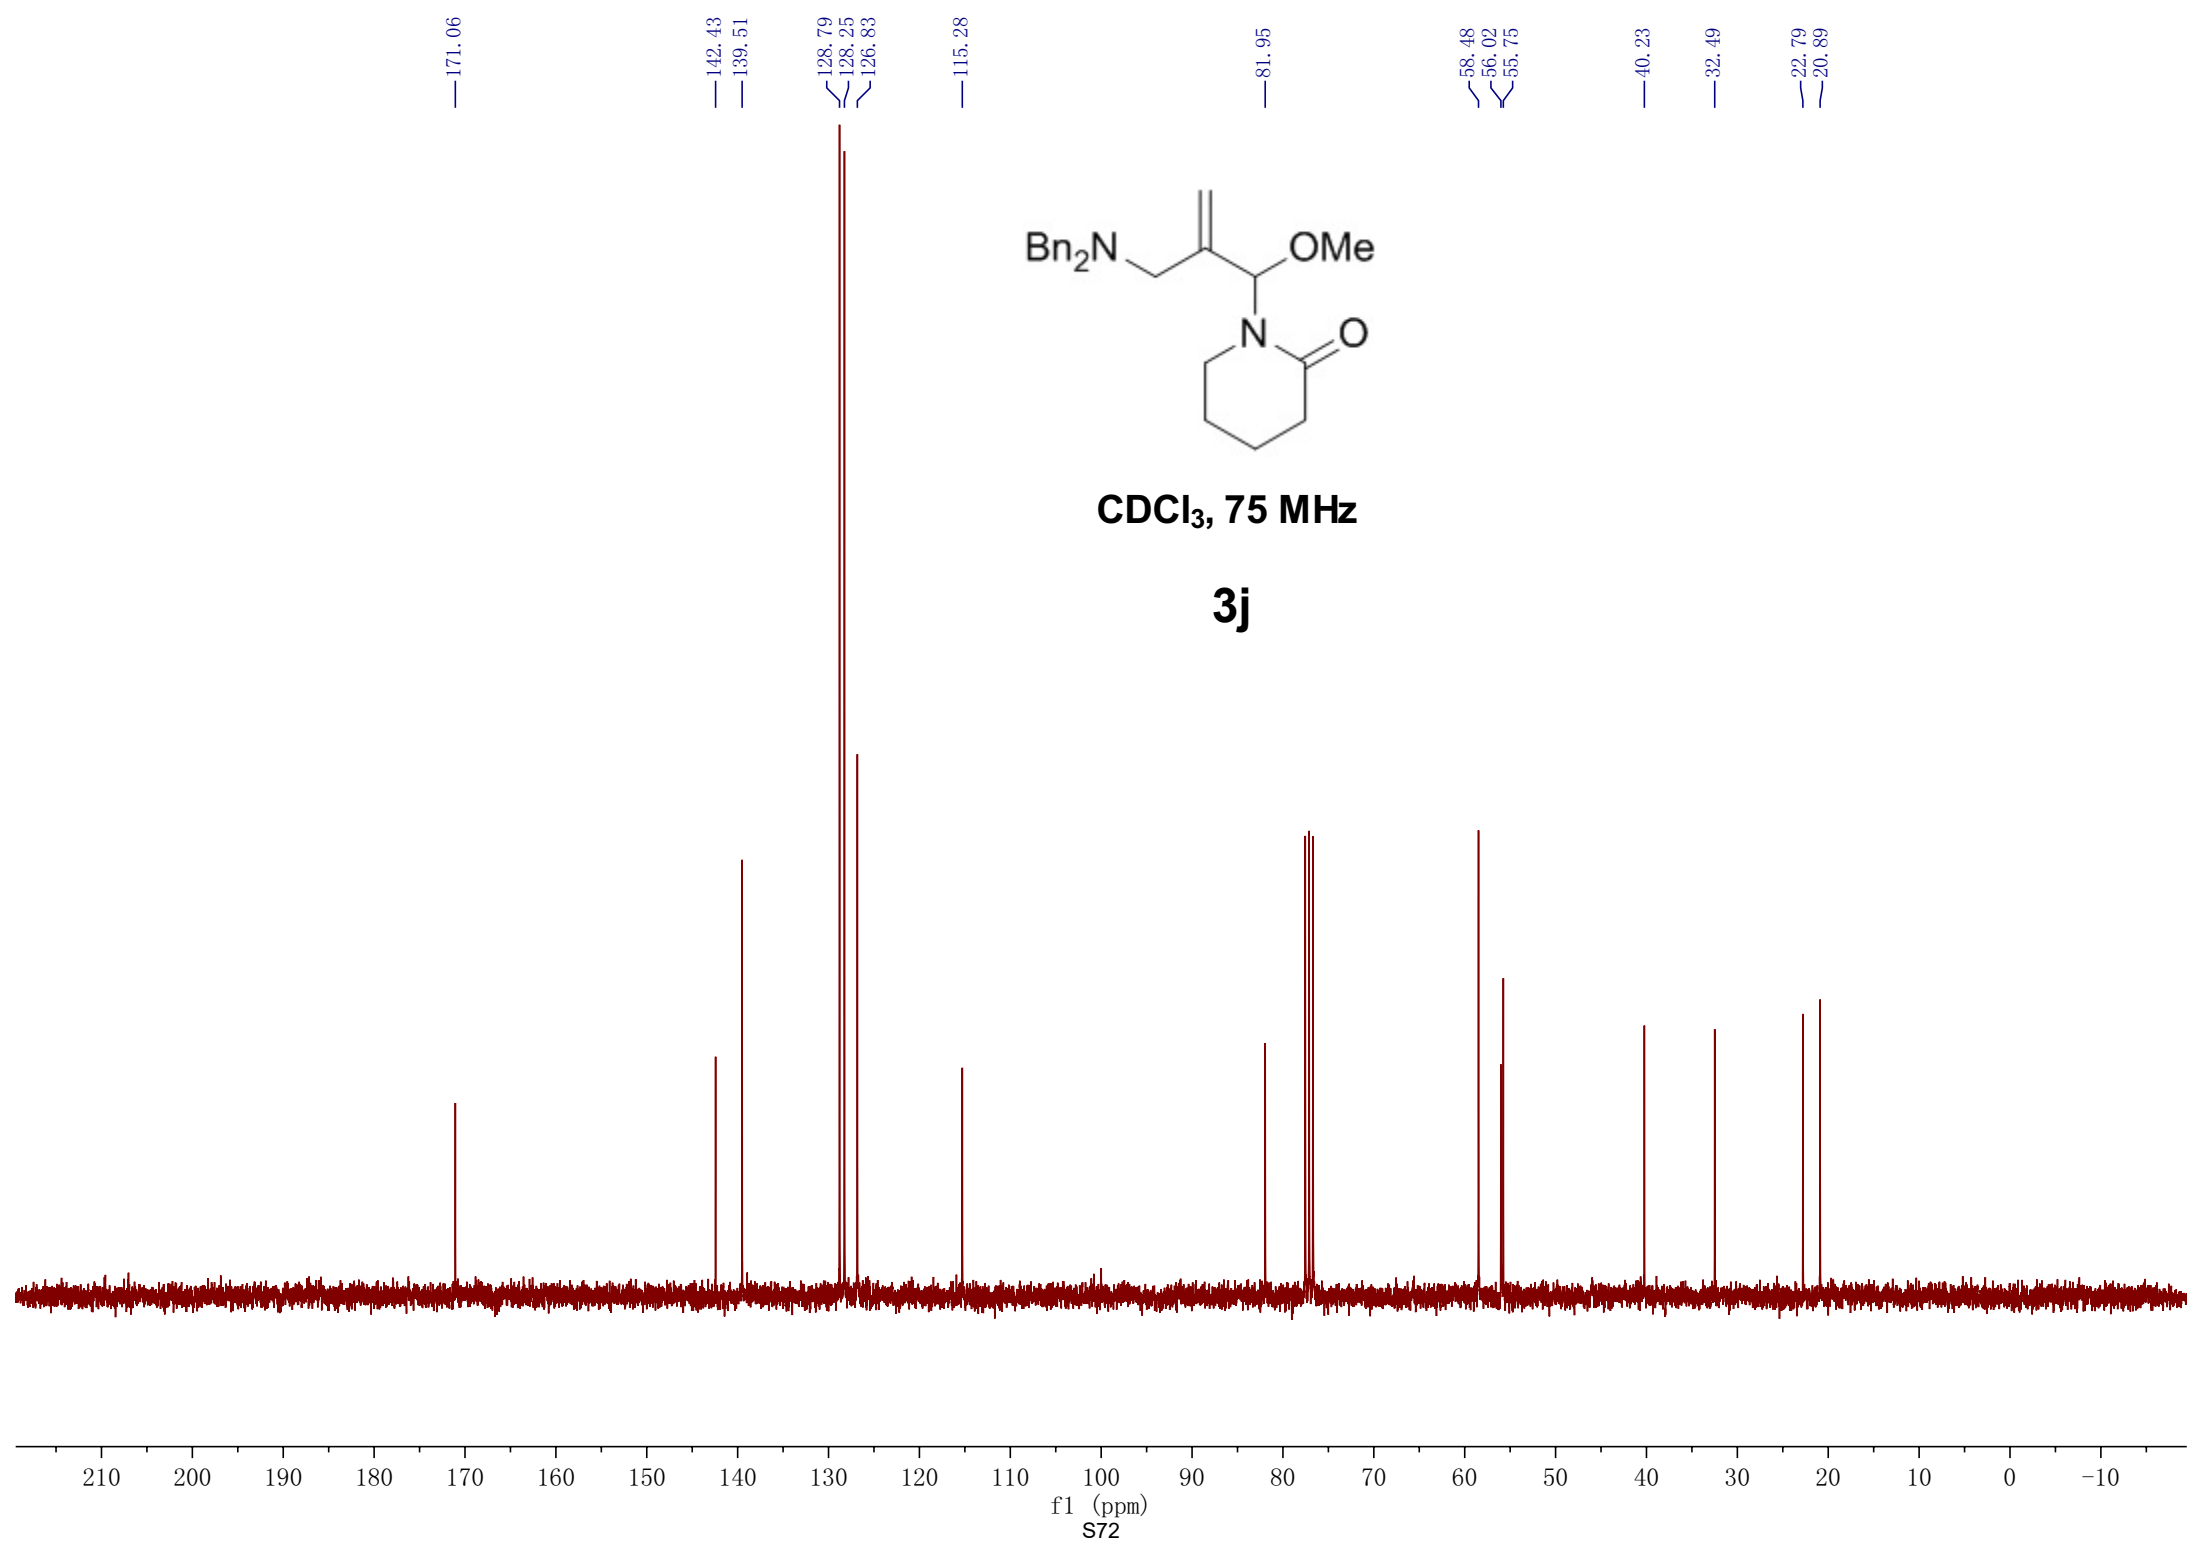

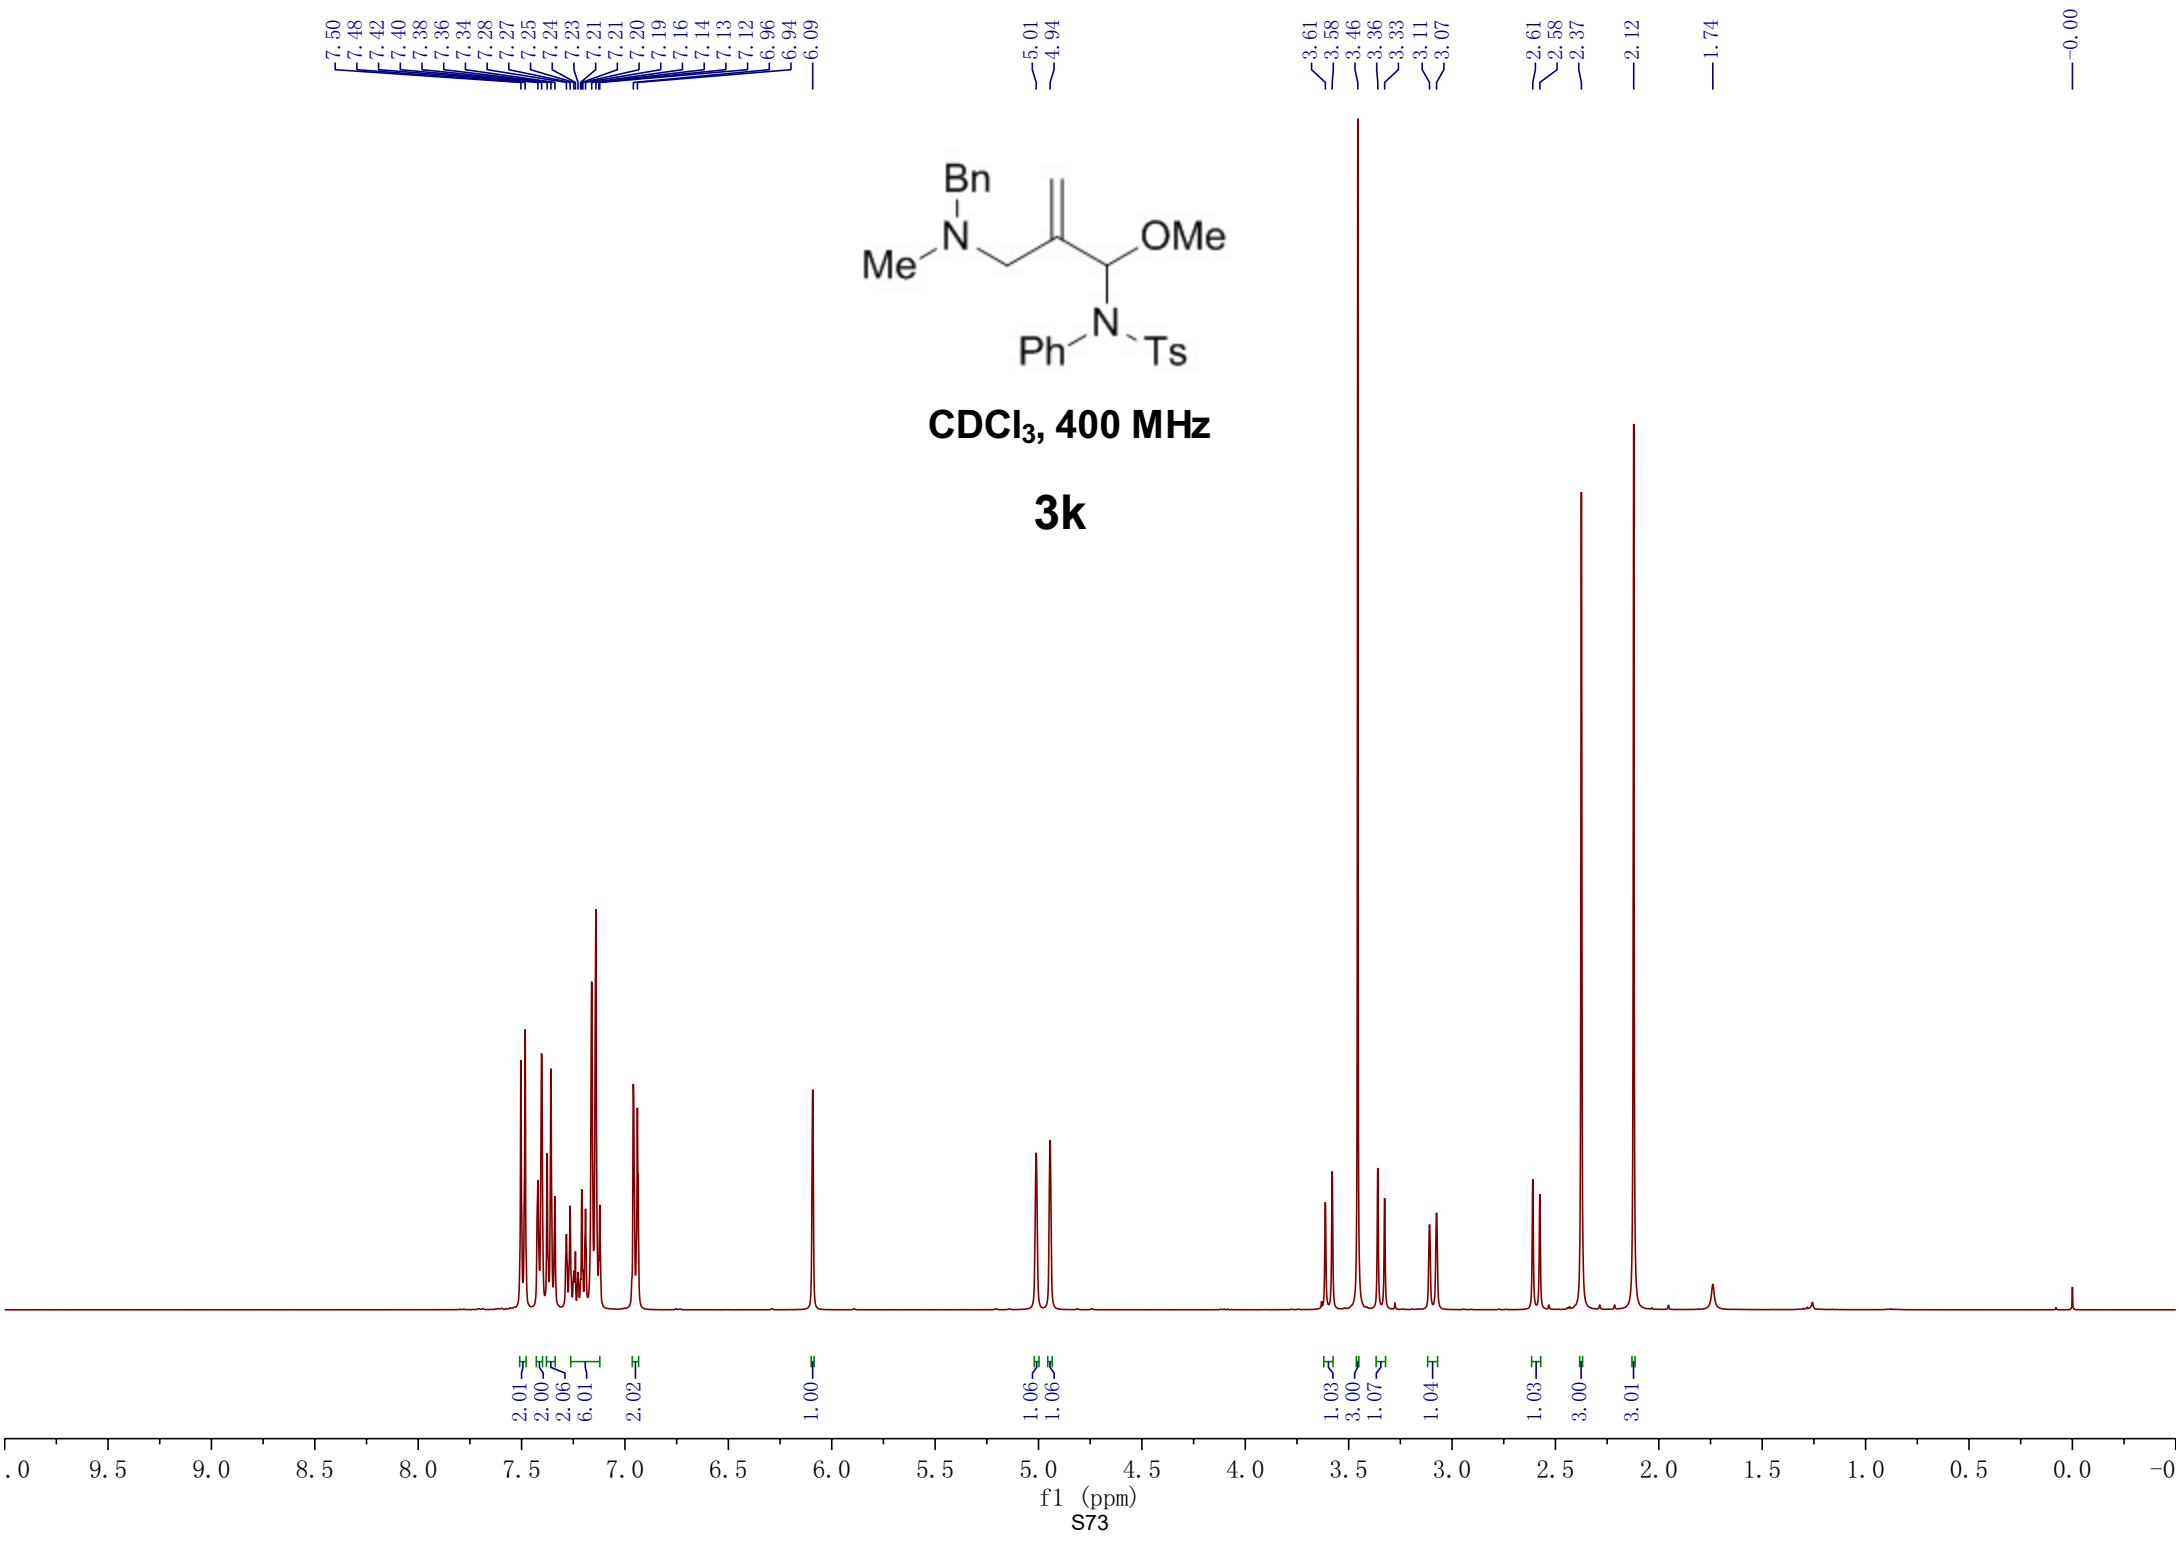

143.24  
140.79  
139.31  
137.14  
135.62  
131.43  
128.98  
128.85  
128.40  
128.18  
128.16  
128.14  
126.96  
117.15

89.01

62.17  
59.95  
56.63

42.26

21.60

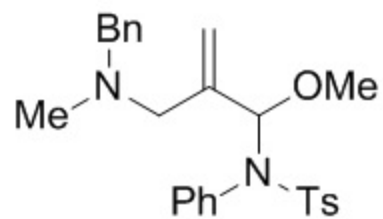

CDCl<sub>3</sub>, 100 MHz

3k

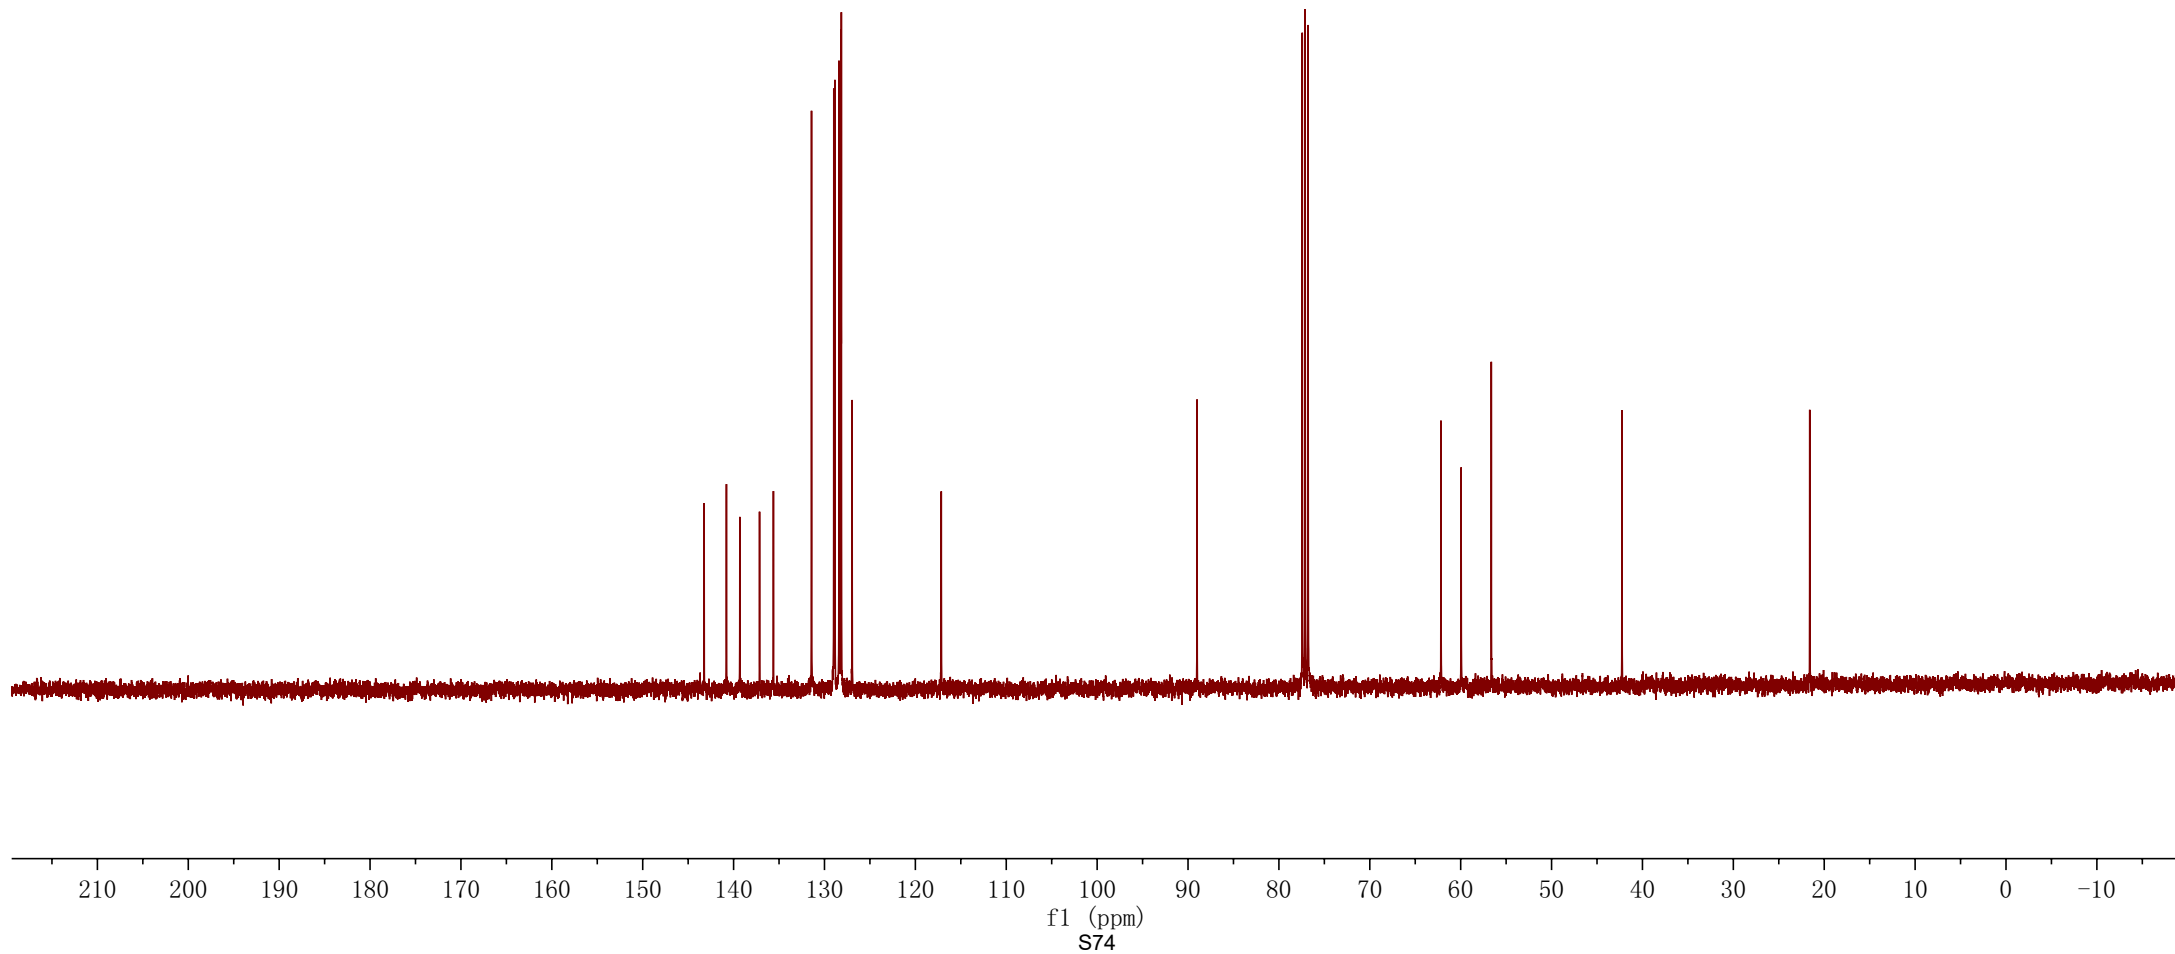

7.57  
7.55  
7.26  
7.26  
7.24  
7.23  
7.22  
7.22  
7.20  
7.19  
7.17  
7.17  
7.04  
7.02  
7.02  
5.97

4.92  
4.91

3.47

2.93  
2.90

2.57  
2.54  
2.40  
2.35  
2.24

1.63  
1.61  
1.59  
1.58  
1.57  
1.55  
1.46  
1.44  
1.43  
1.41

0.00

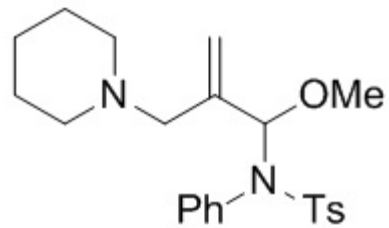

CDCl<sub>3</sub>, 400 MHz

3I

9.0 9.5 8.0 8.5 7.5 7.0 6.5 6.0 5.5 5.0 4.5 4.0 3.5 3.0 2.5 2.0 1.5 1.0 0.5 0.0 -0

f1 (ppm)  
S75

2.00

5.05

2.00

1.00

1.06

1.05

3.01

1.06

1.00

3.00

2.00

2.00

4.00

2.05

143.22  
140.39  
137.38  
135.60  
131.40  
129.01  
128.21  
128.20  
128.06

116.69

89.05

61.19  
56.43  
54.69

26.09  
24.51  
21.58

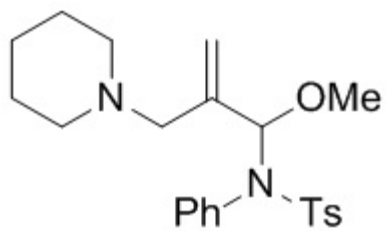

CDCl<sub>3</sub>, 75 MHz

**3I**

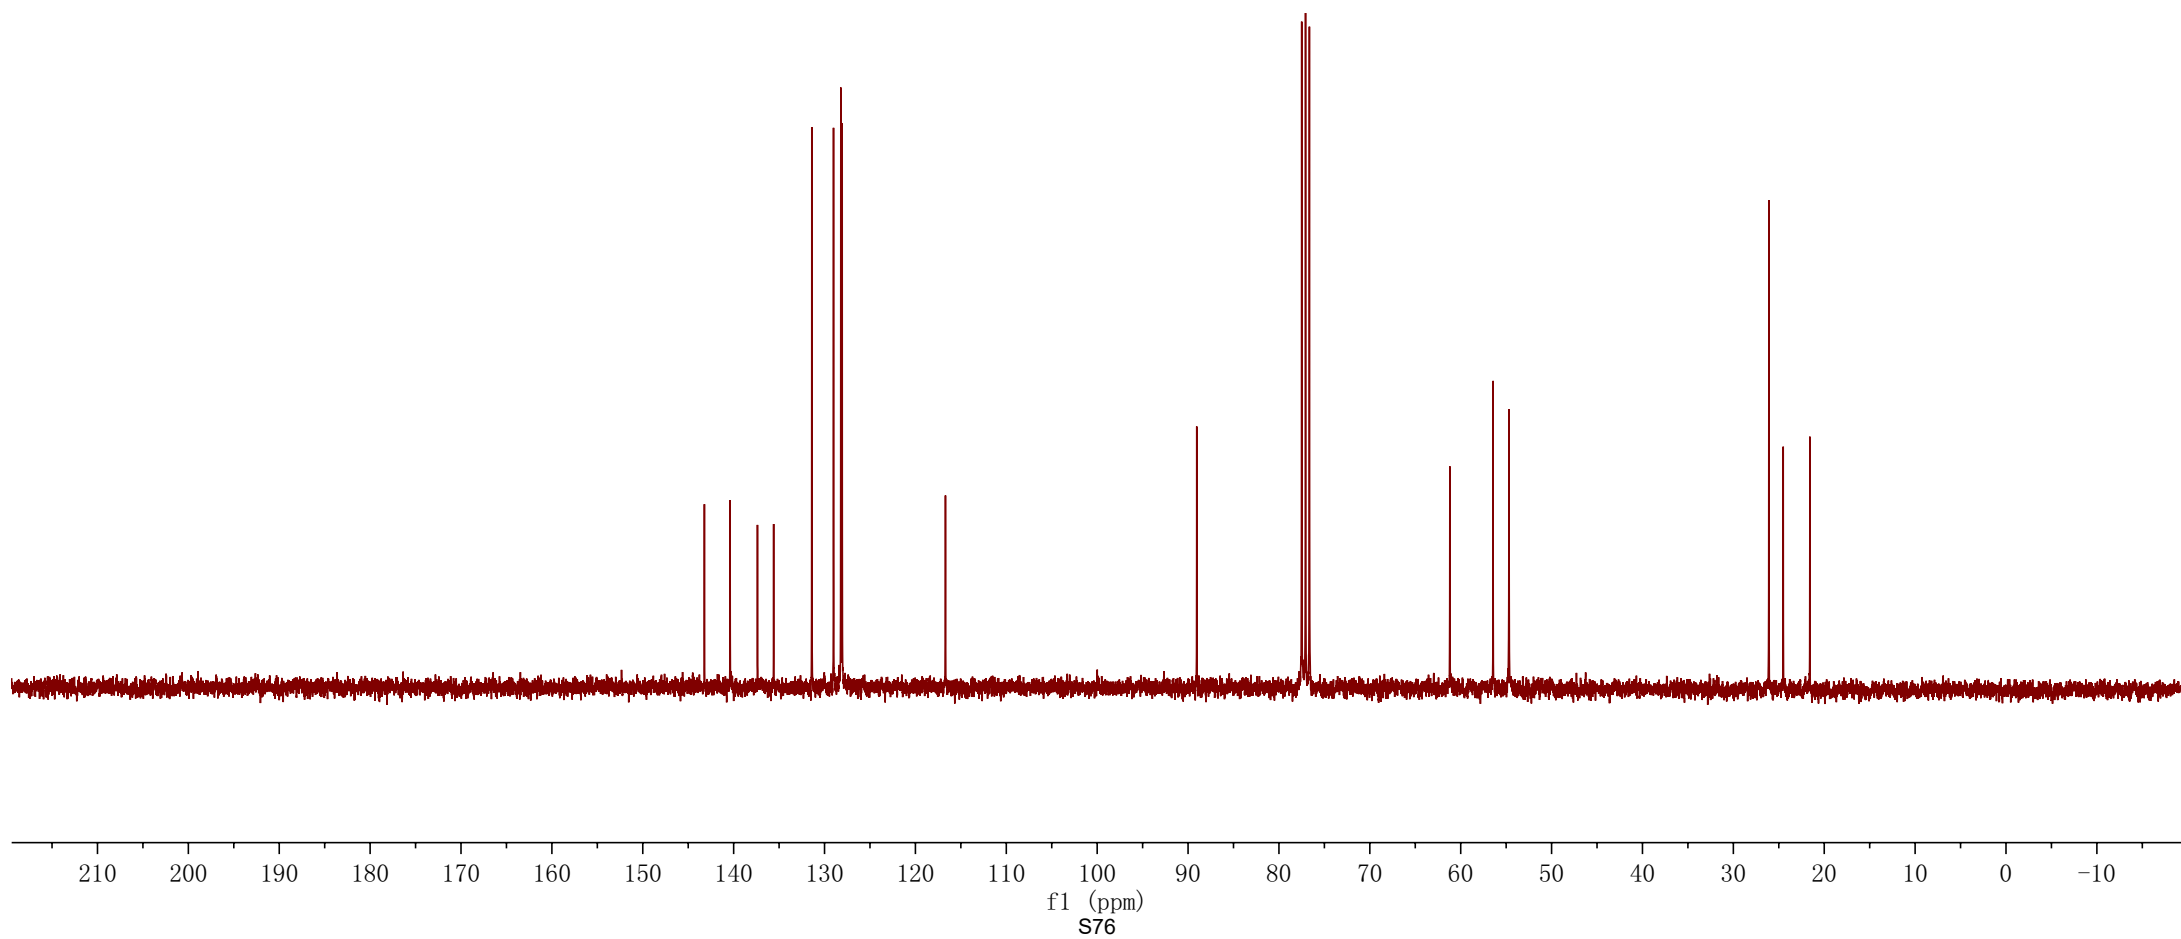

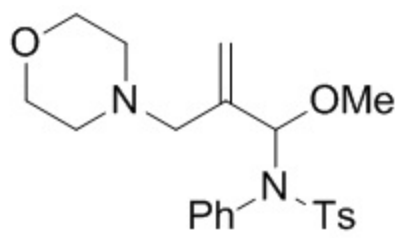

CDCl<sub>3</sub>, 300 MHz

3m

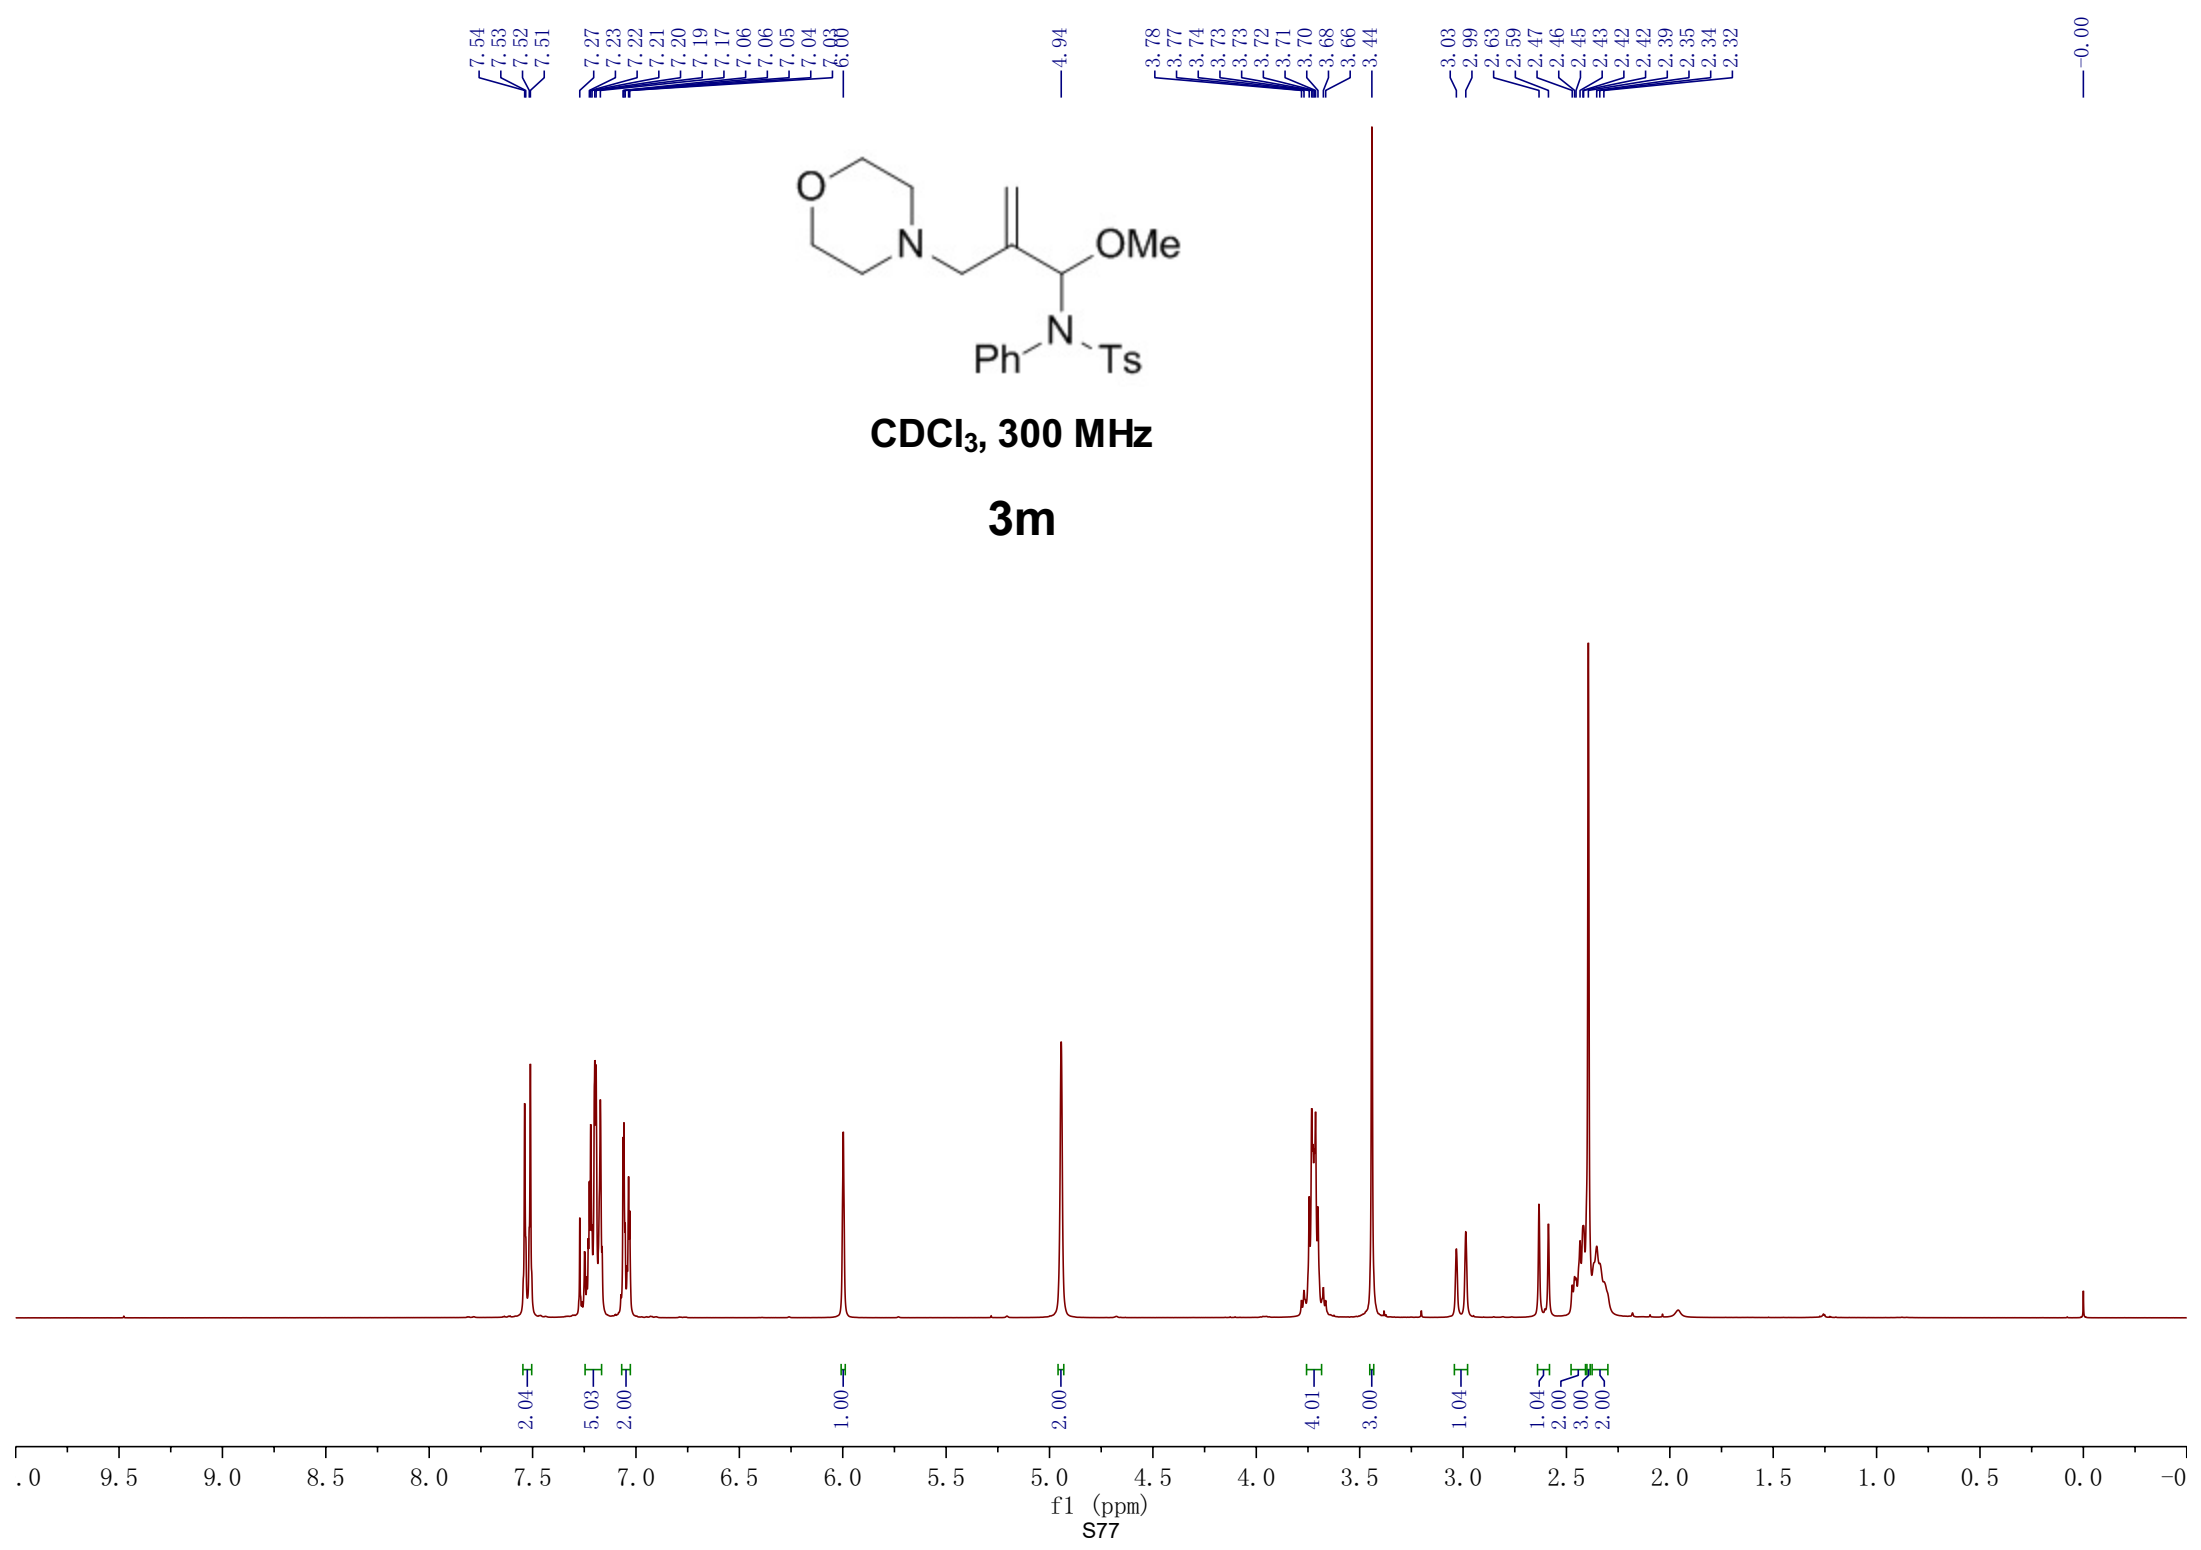

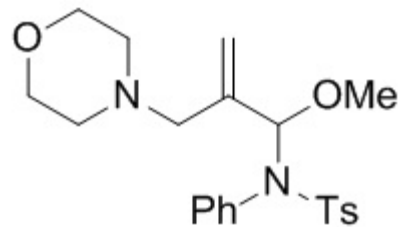

CDCl<sub>3</sub>, 100 MHz

3m

143.35  
139.53  
137.11  
135.47  
131.37  
129.05  
128.27  
128.01

117.40

88.87

67.11

60.78  
56.52  
53.69

21.58

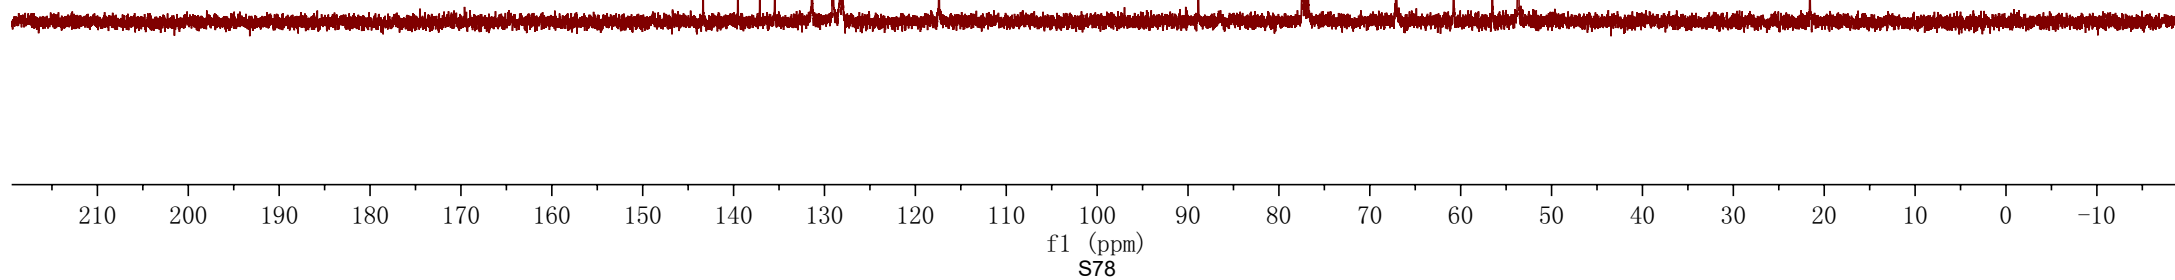



7.55  
7.53  
7.24  
7.22  
7.20  
7.20  
7.19  
7.19  
7.18  
7.17  
7.06  
7.05  
7.04  
6.88  
4.91  
4.86  
3.45  
3.04  
3.00  
2.84  
2.80  
2.62  
2.61  
2.59  
2.58  
2.57  
2.56  
2.54  
2.51  
2.40  
1.70  
1.69  
1.69  
1.66  
1.62  
0.00

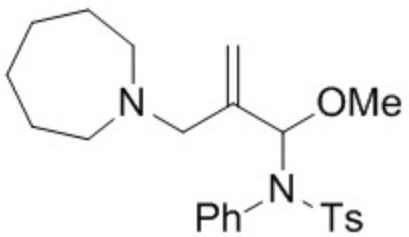

CDCl<sub>3</sub>, 400 MHz

3n

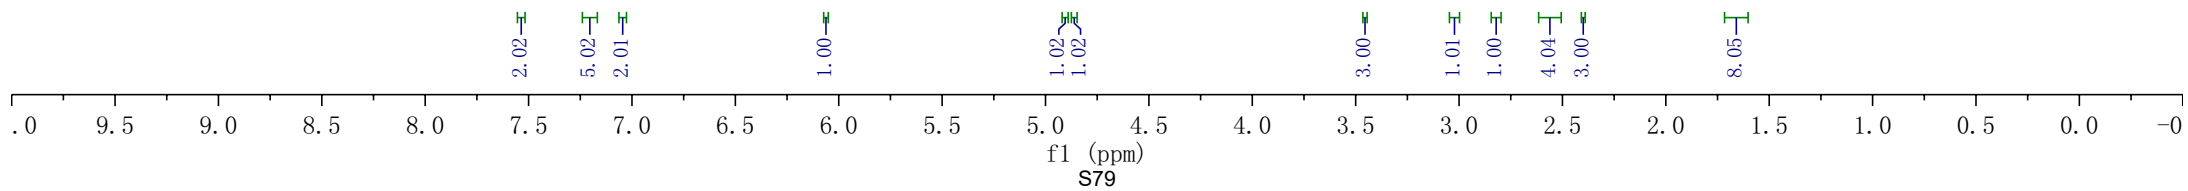

143.20  
141.64  
137.26  
135.67  
131.43  
128.98  
128.18  
128.15  
128.08

116.36

88.86

60.65  
56.50  
55.54

28.62  
27.05

21.59

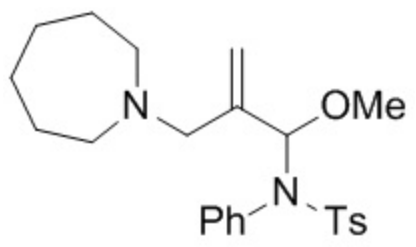

CDCl<sub>3</sub>, 100 MHz

3n

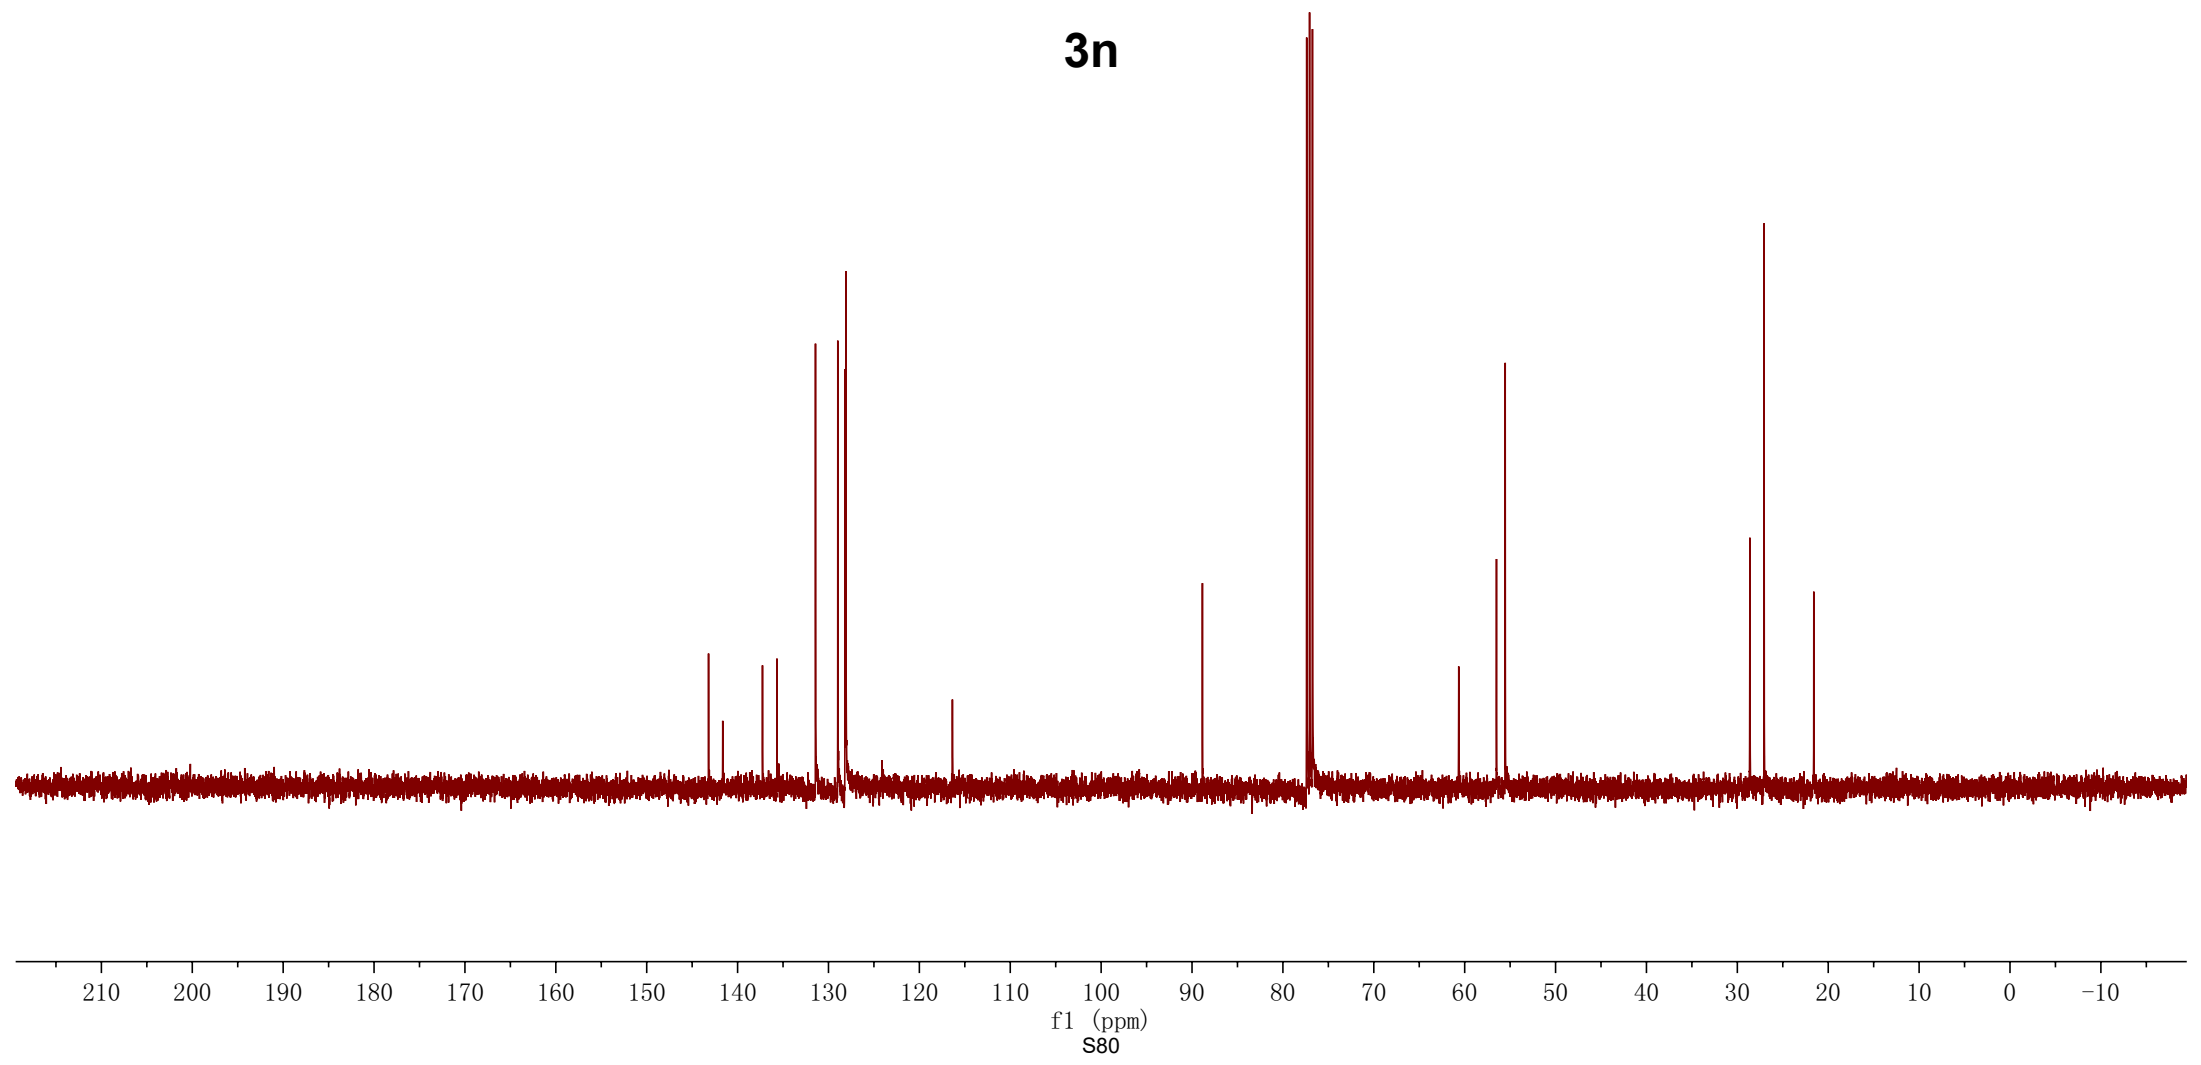

7.45  
7.44  
7.41  
7.39  
7.37  
7.35  
7.28  
7.26  
7.24  
7.17  
7.15  
7.14  
7.12  
7.06  
7.04  
7.02  
6.78  
6.76

6.18

5.13  
5.01

3.75  
3.72  
3.69  
3.67  
3.65  
3.63  
3.53  
3.52  
3.50  
3.50  
3.48  
3.46  
3.25  
3.22  
3.11  
3.08

2.68  
2.64

2.38

1.59

1.16  
1.14  
1.13

0.00

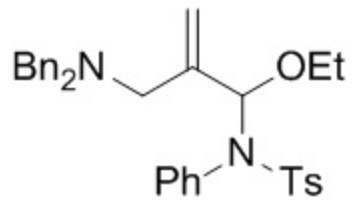

CDCl<sub>3</sub>, 400 MHz

3o

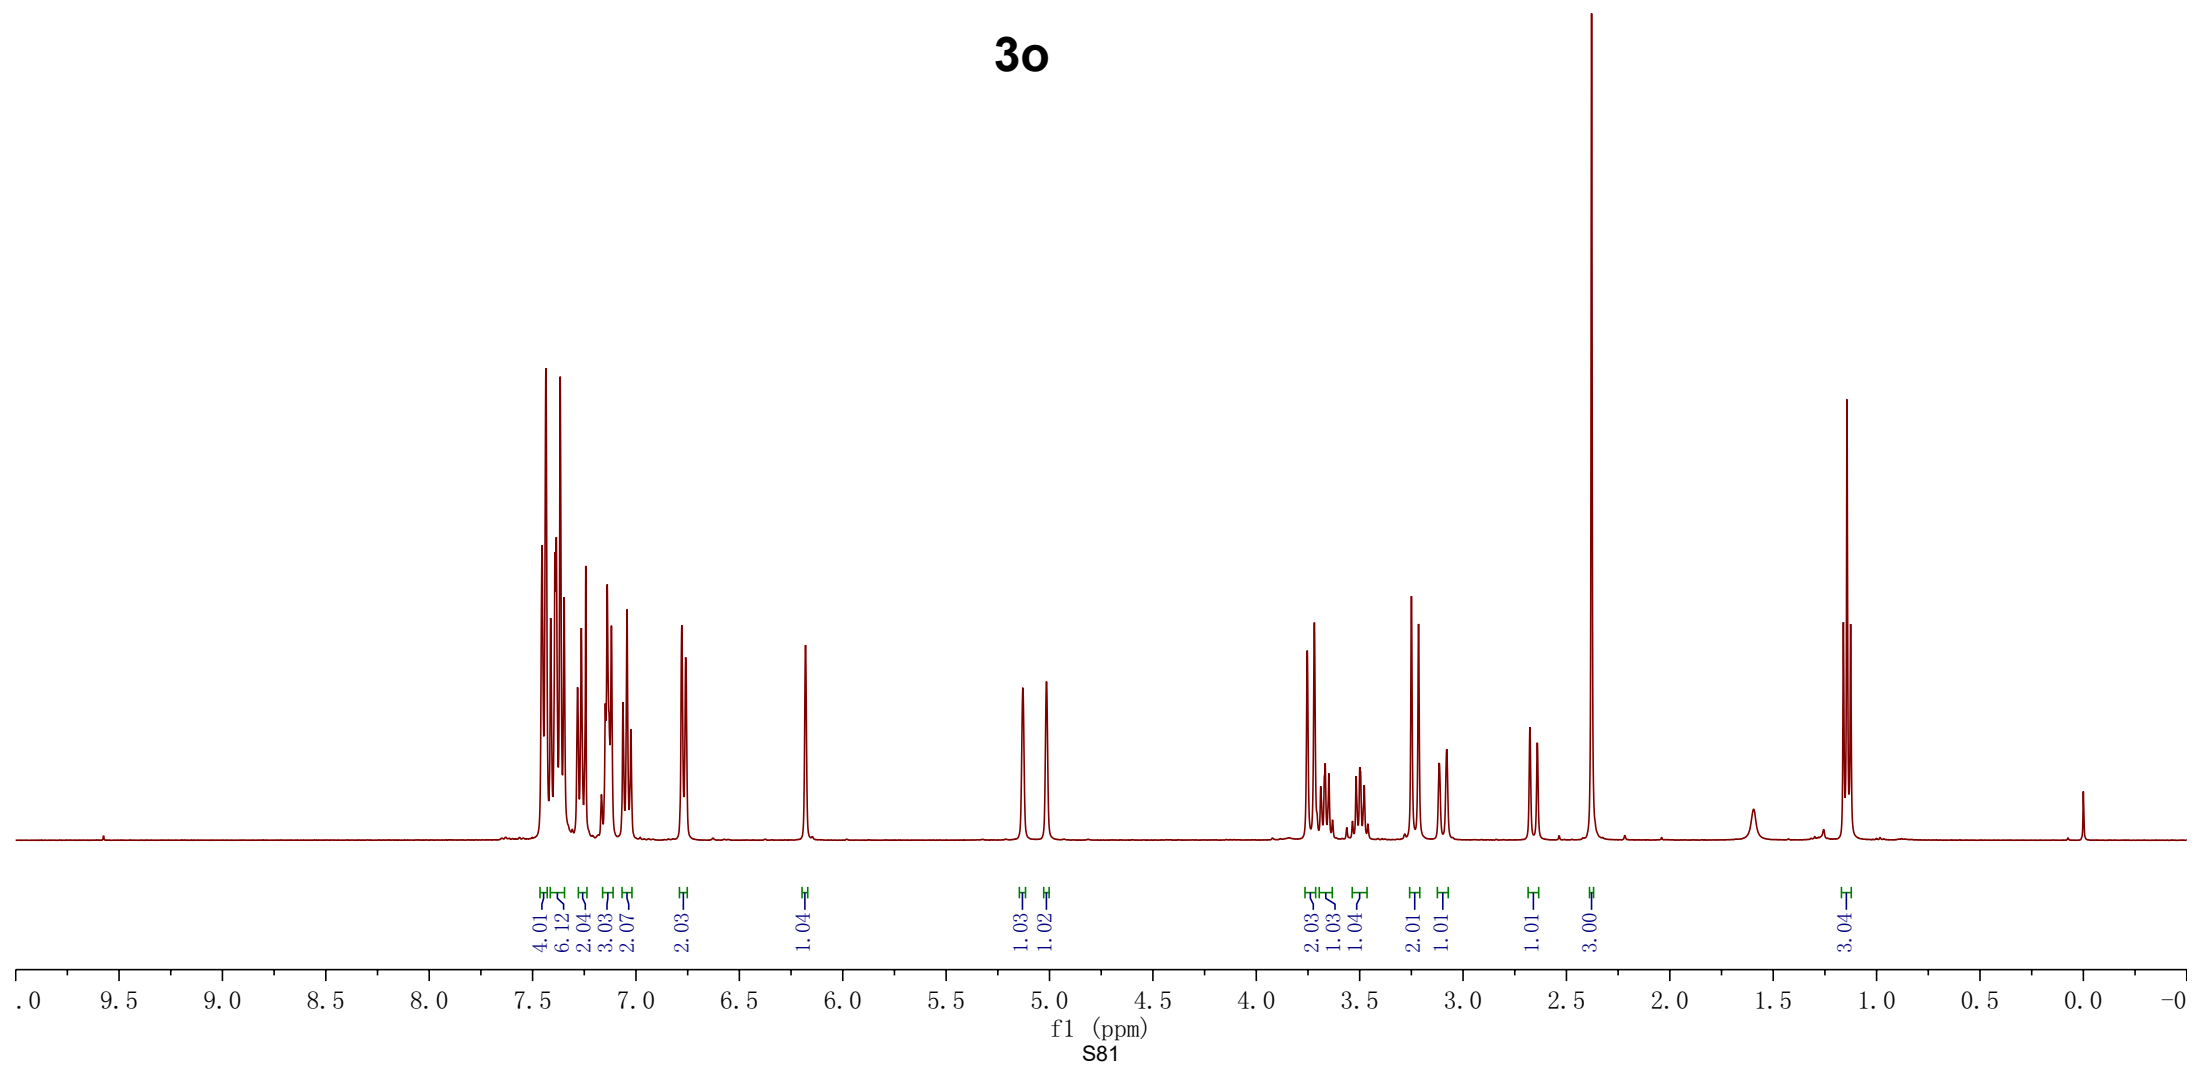

143.07  
141.11  
139.30  
137.00  
135.80  
131.35  
128.75  
128.72  
128.49  
128.25  
127.98  
127.91  
126.93  
117.17

87.59

64.50

58.41

56.41

21.58

14.95

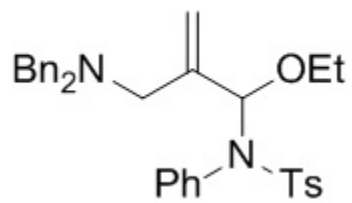

CDCl<sub>3</sub>, 100 MHz

3o

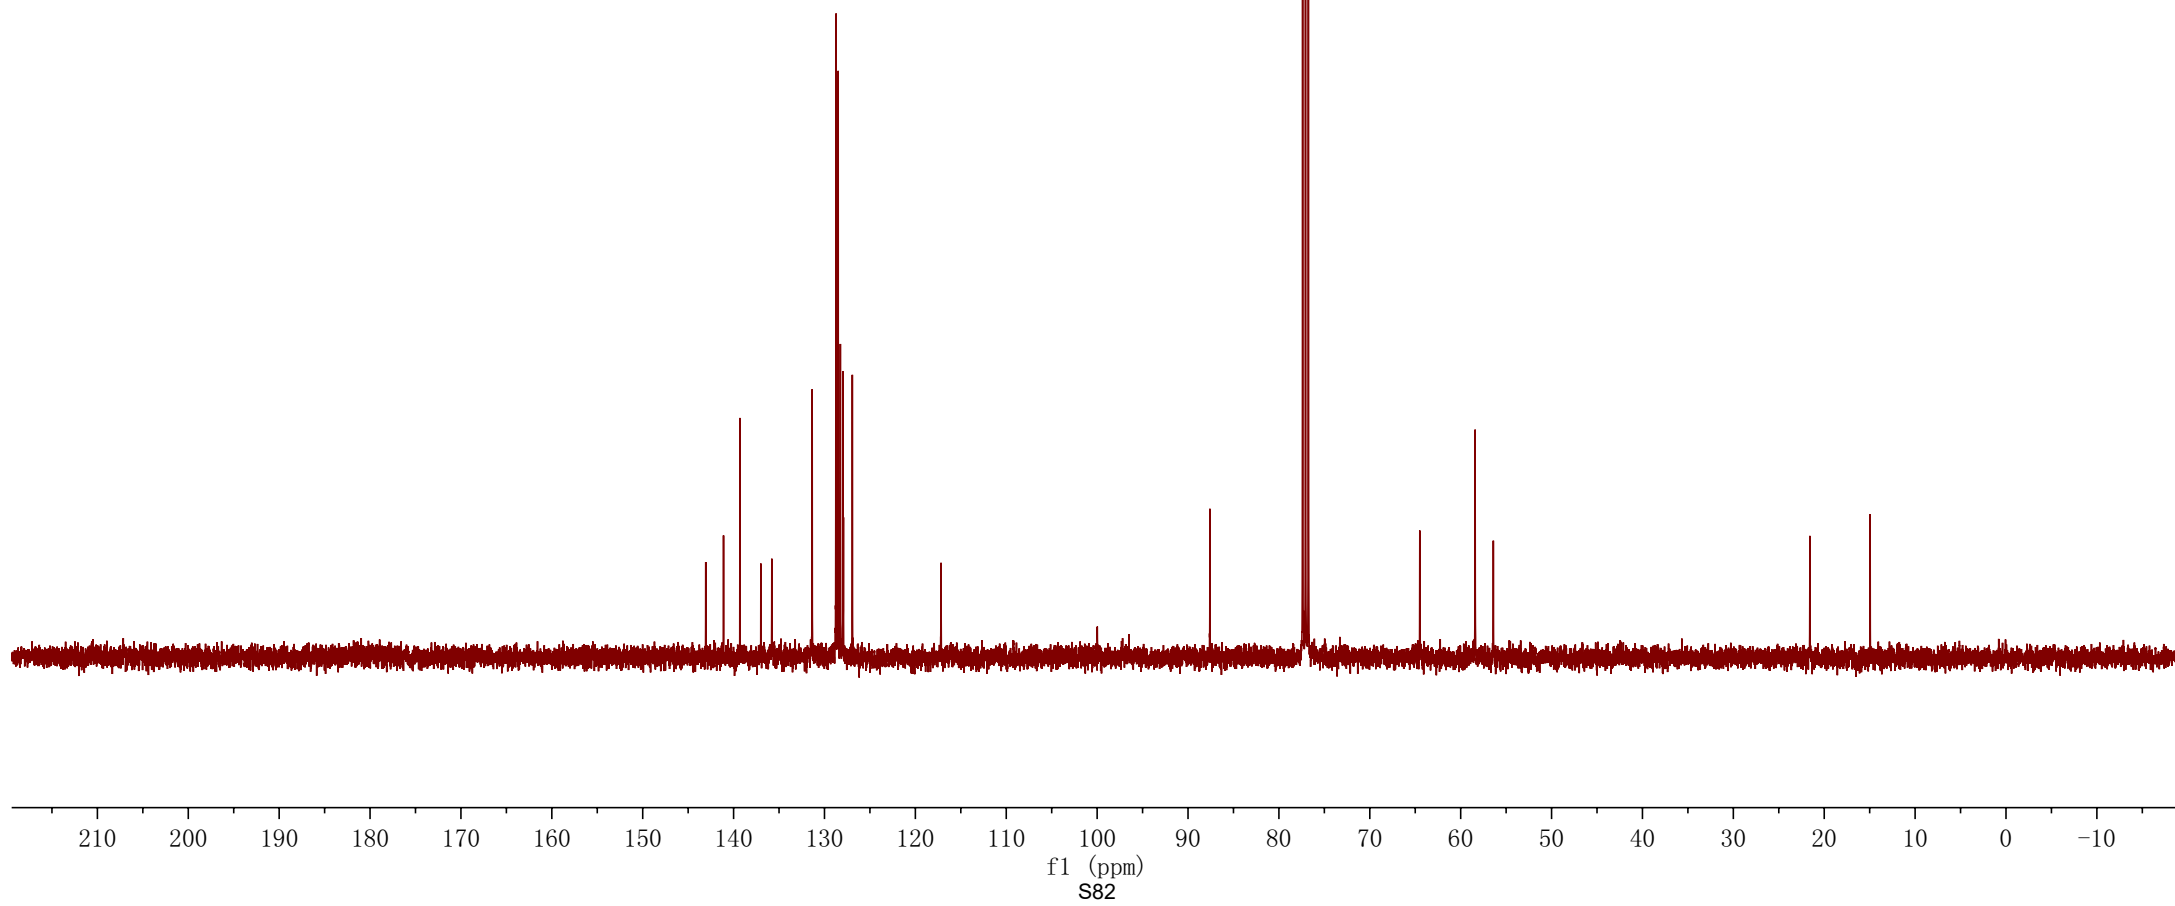

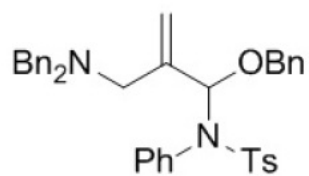

CDCl<sub>3</sub>, 400 MHz

**3p**

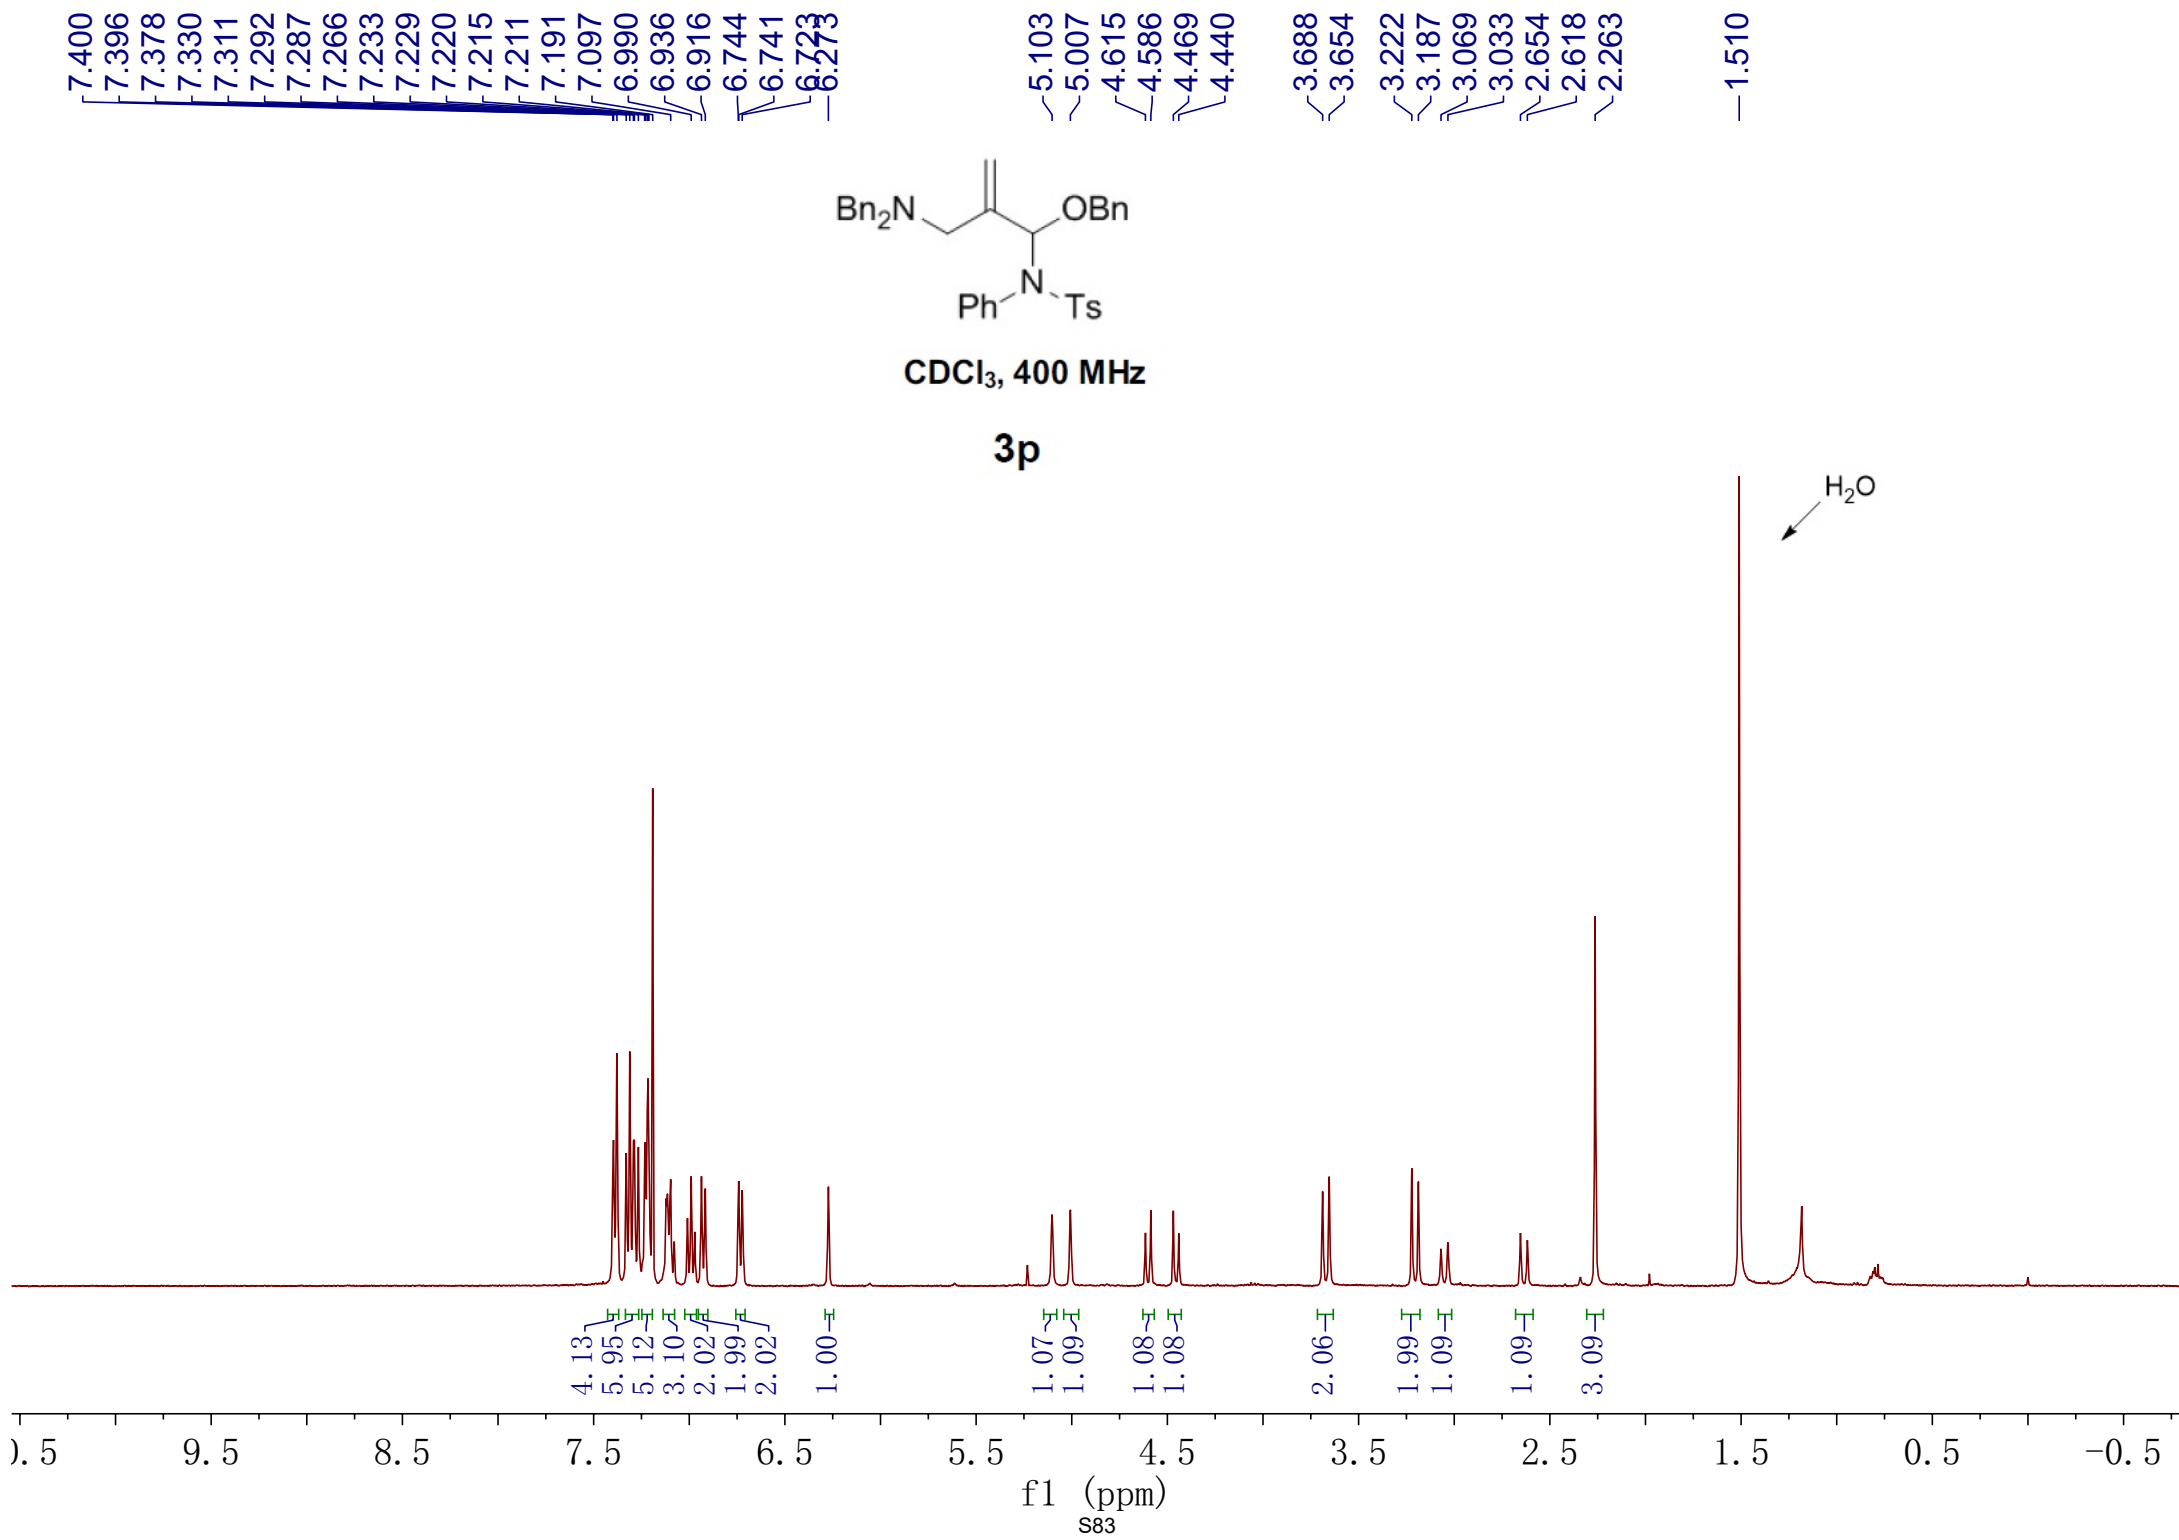

143.06  
140.80  
139.25  
137.56  
136.87  
135.64  
131.40  
128.87  
128.75  
128.50  
128.23  
128.17  
128.09  
128.03  
127.53  
127.41  
126.97  
117.55

87.66

70.83

58.48  
56.46

21.52

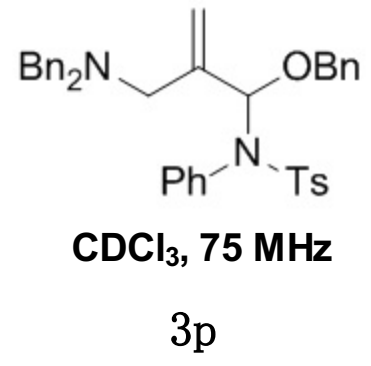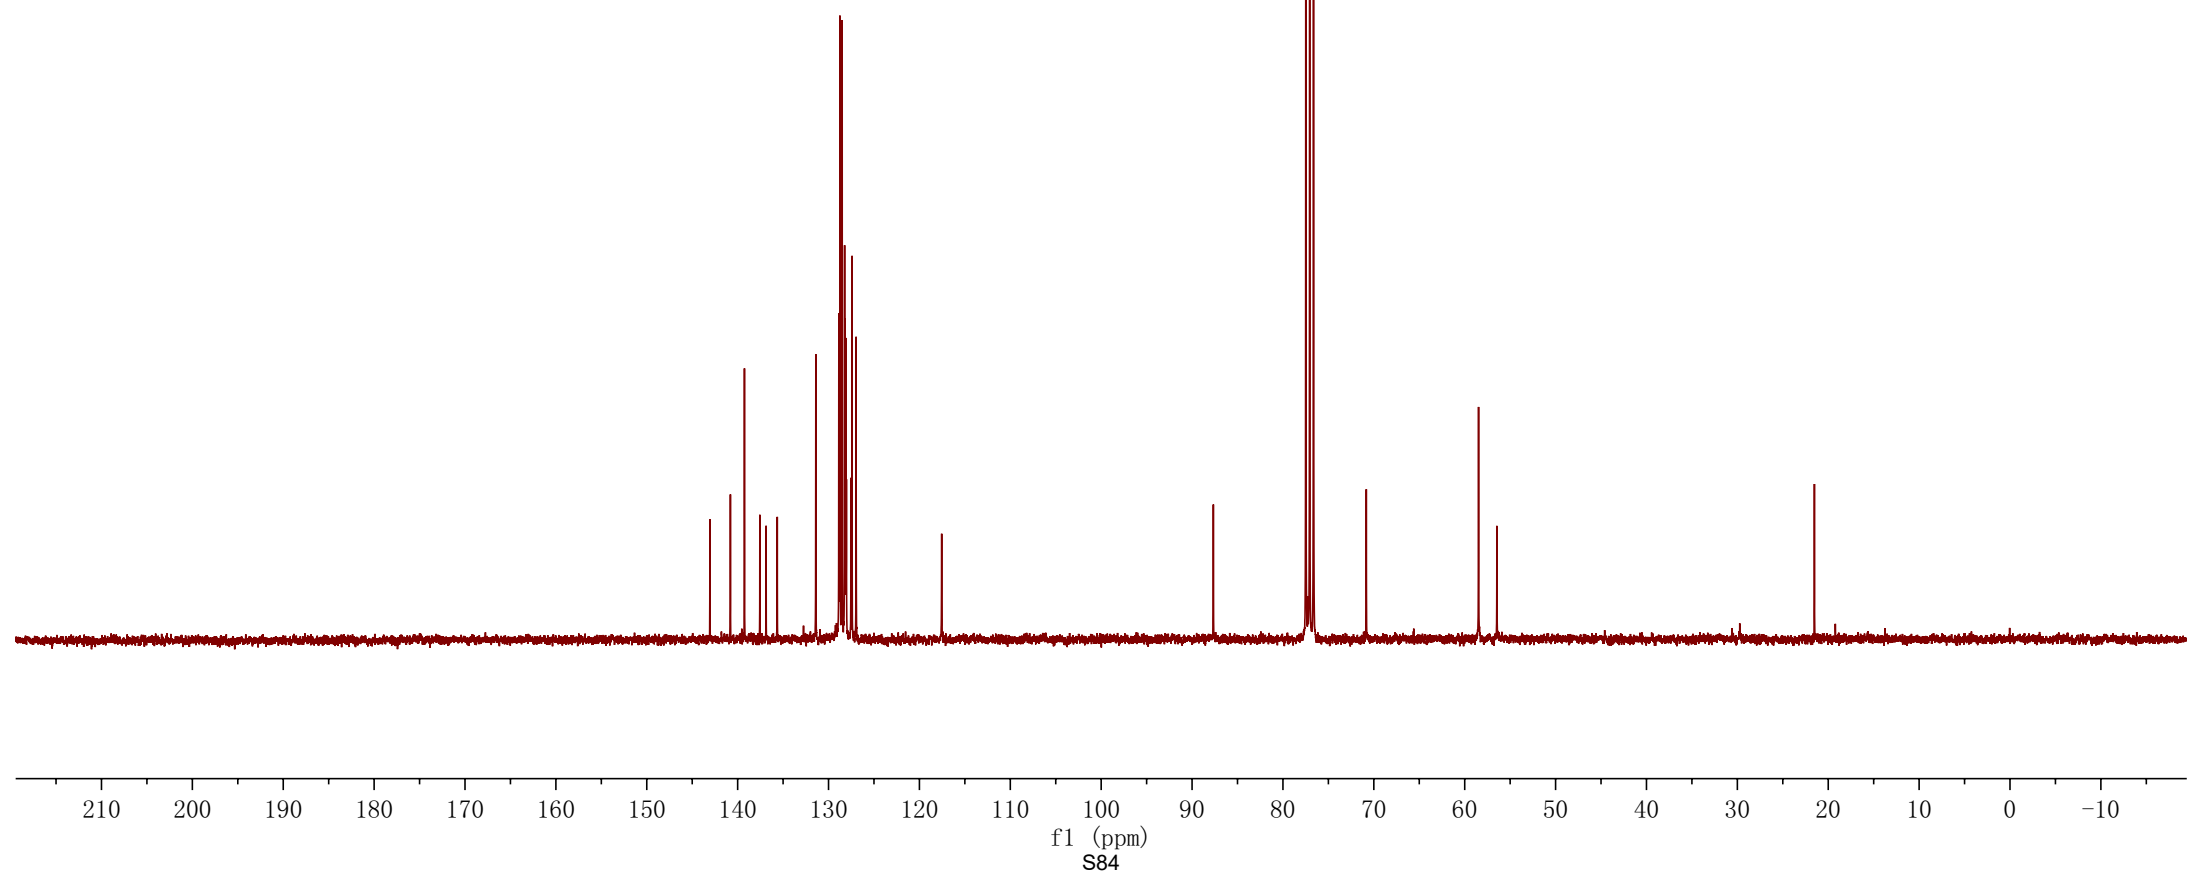

7.4589  
7.4407  
7.4039  
7.3898  
7.3835  
7.3717  
7.3525  
7.3249  
7.3067  
7.2866  
7.2684  
7.2501  
7.2342  
7.1666  
7.1482  
7.1296  
7.1139  
7.0935  
7.0602  
7.0404  
7.0216  
6.7675  
6.7487

6.2483

5.8995  
5.8865  
5.8732  
5.8566  
5.8434  
5.8303

5.1873  
5.1834  
5.1434  
5.1407  
5.1252  
5.1220  
5.0990  
5.0328

4.1767  
4.1581  
4.1454  
4.0280  
4.0143  
3.9967  
3.9830  
3.9606  
3.7263  
3.5606

3.2808  
3.2503  
3.2160  
3.1187  
3.0829

2.6764  
2.6405

2.3650

1.2559

0.0003

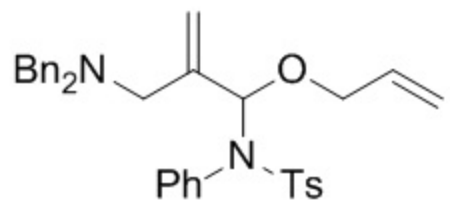

CDCl<sub>3</sub>, 400 MHz

3q

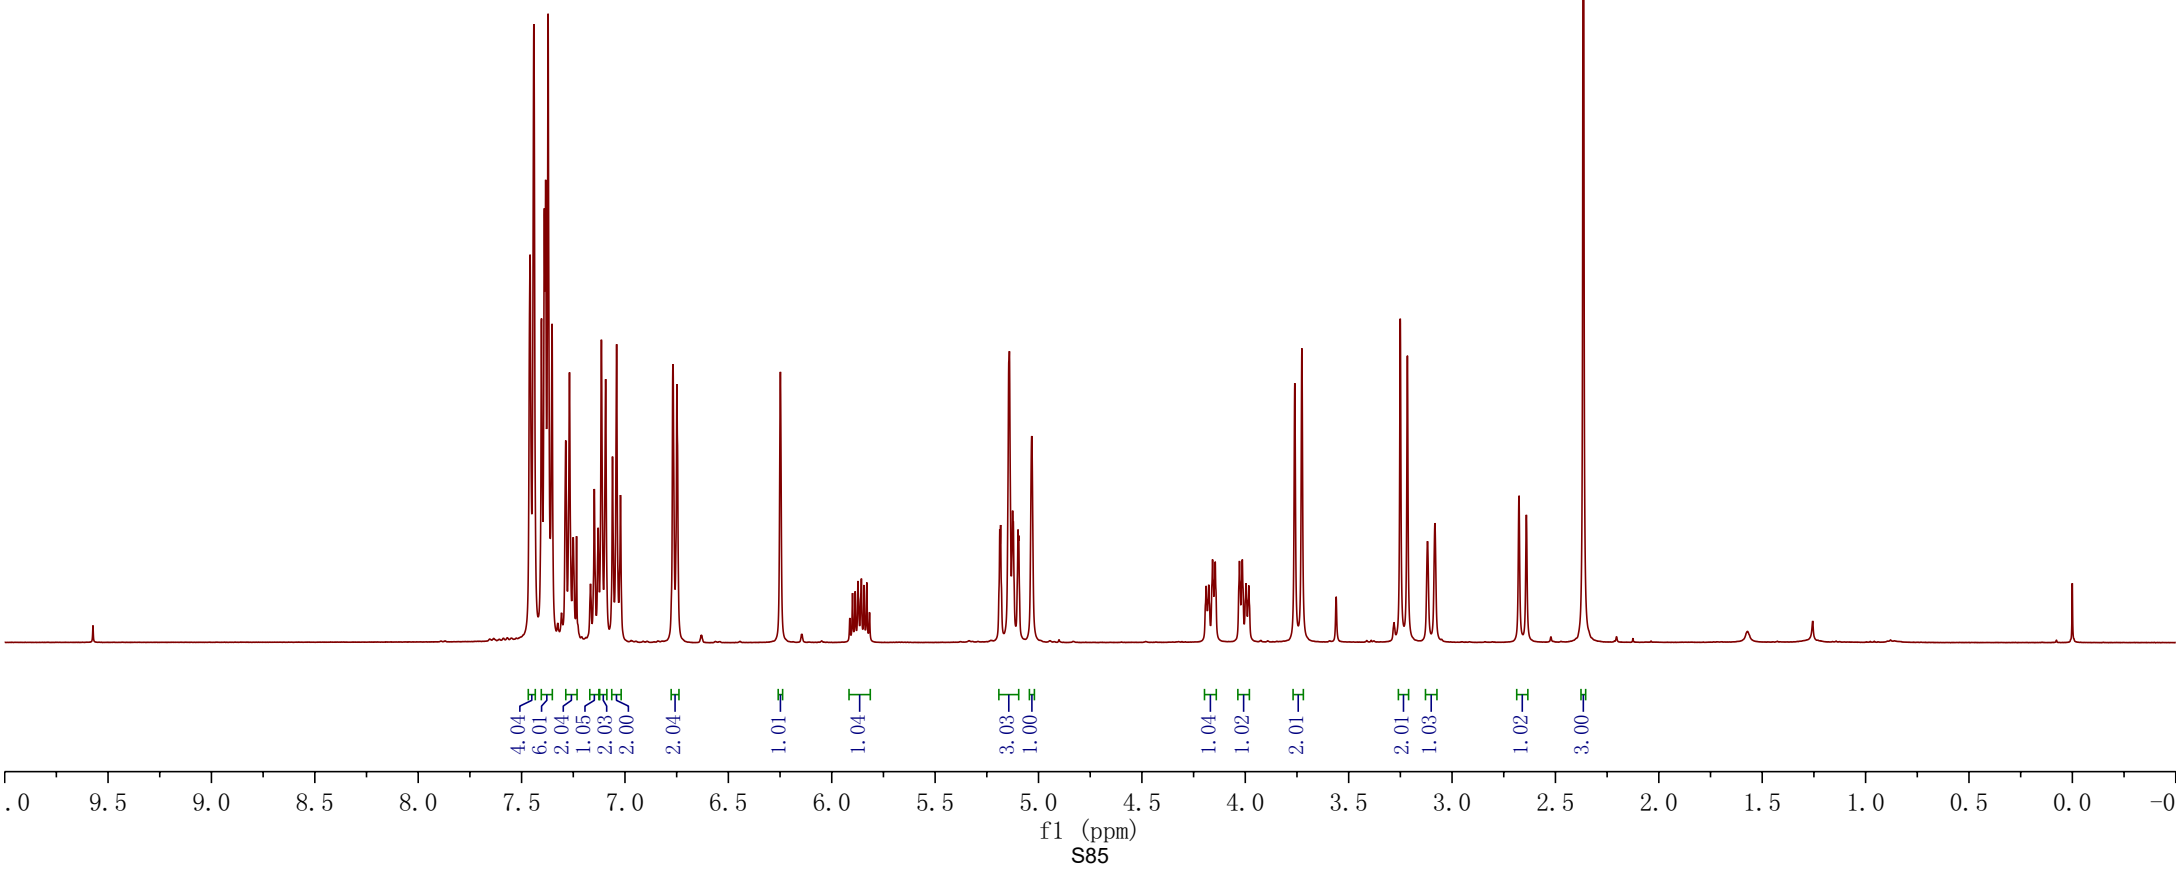

143.12  
140.83  
139.26  
136.80  
135.66  
133.79  
131.37  
128.83  
128.75  
128.52  
128.33  
128.05  
128.00  
126.98  
117.52  
116.70

87.39

69.84

58.46  
56.45

21.60

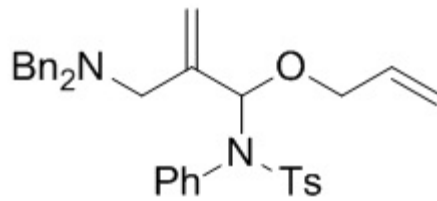

CDCl<sub>3</sub>, 100 MHz

3q

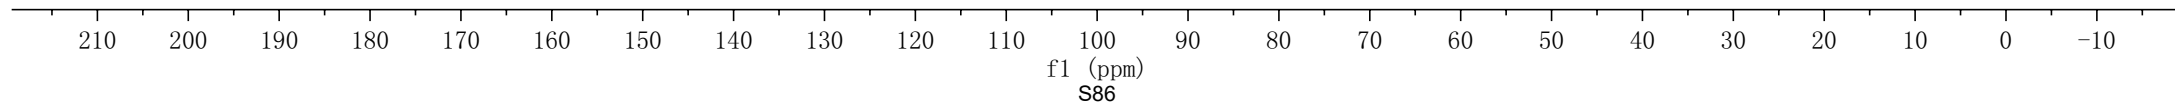



7.48  
7.47  
7.46  
7.46  
7.45  
7.39  
7.37  
7.35  
7.28  
7.27  
7.25  
7.23  
7.17  
7.15  
7.14  
7.13  
7.13  
7.12  
7.06  
7.04  
7.03  
7.02  
6.74  
6.72  
6.71  
6.39

5.14  
5.00

4.20  
4.20

3.78  
3.75

3.26  
3.23  
3.13  
3.10

2.68  
2.65  
2.44  
2.44  
2.43  
2.37  
2.03

1.59  
1.27  
1.26  
1.25

0.00

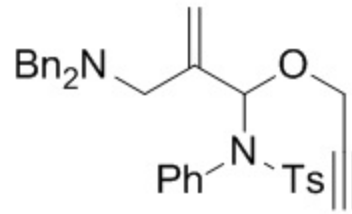

CDCl<sub>3</sub>, 400 MHz

3r

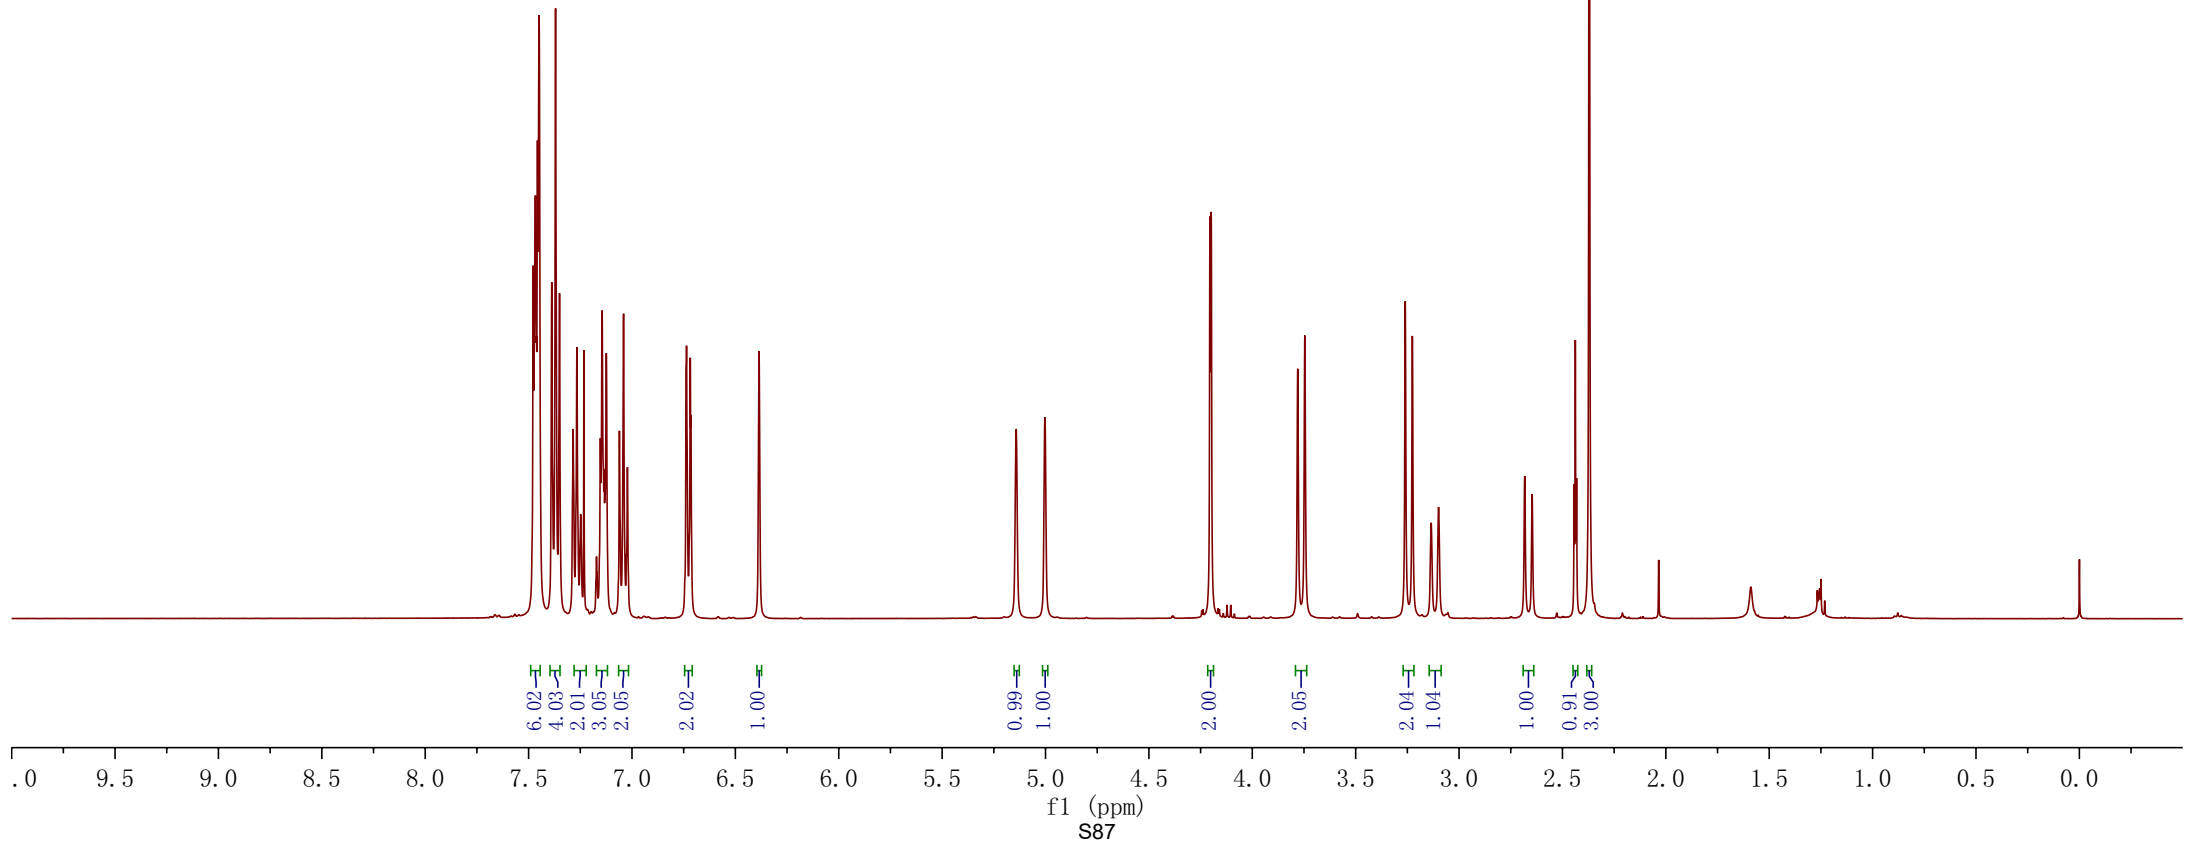

143.24  
140.25  
139.16  
136.65  
135.49  
131.40  
128.88  
128.81  
128.49  
128.44  
128.12  
128.08  
126.98  
117.89

86.98  
79.03  
75.20

58.44  
56.47  
56.21

21.60

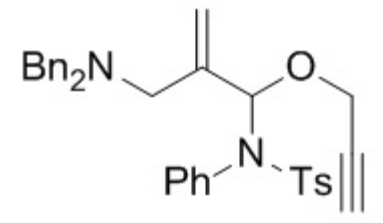

CDCl<sub>3</sub>, 75 MHz

3r

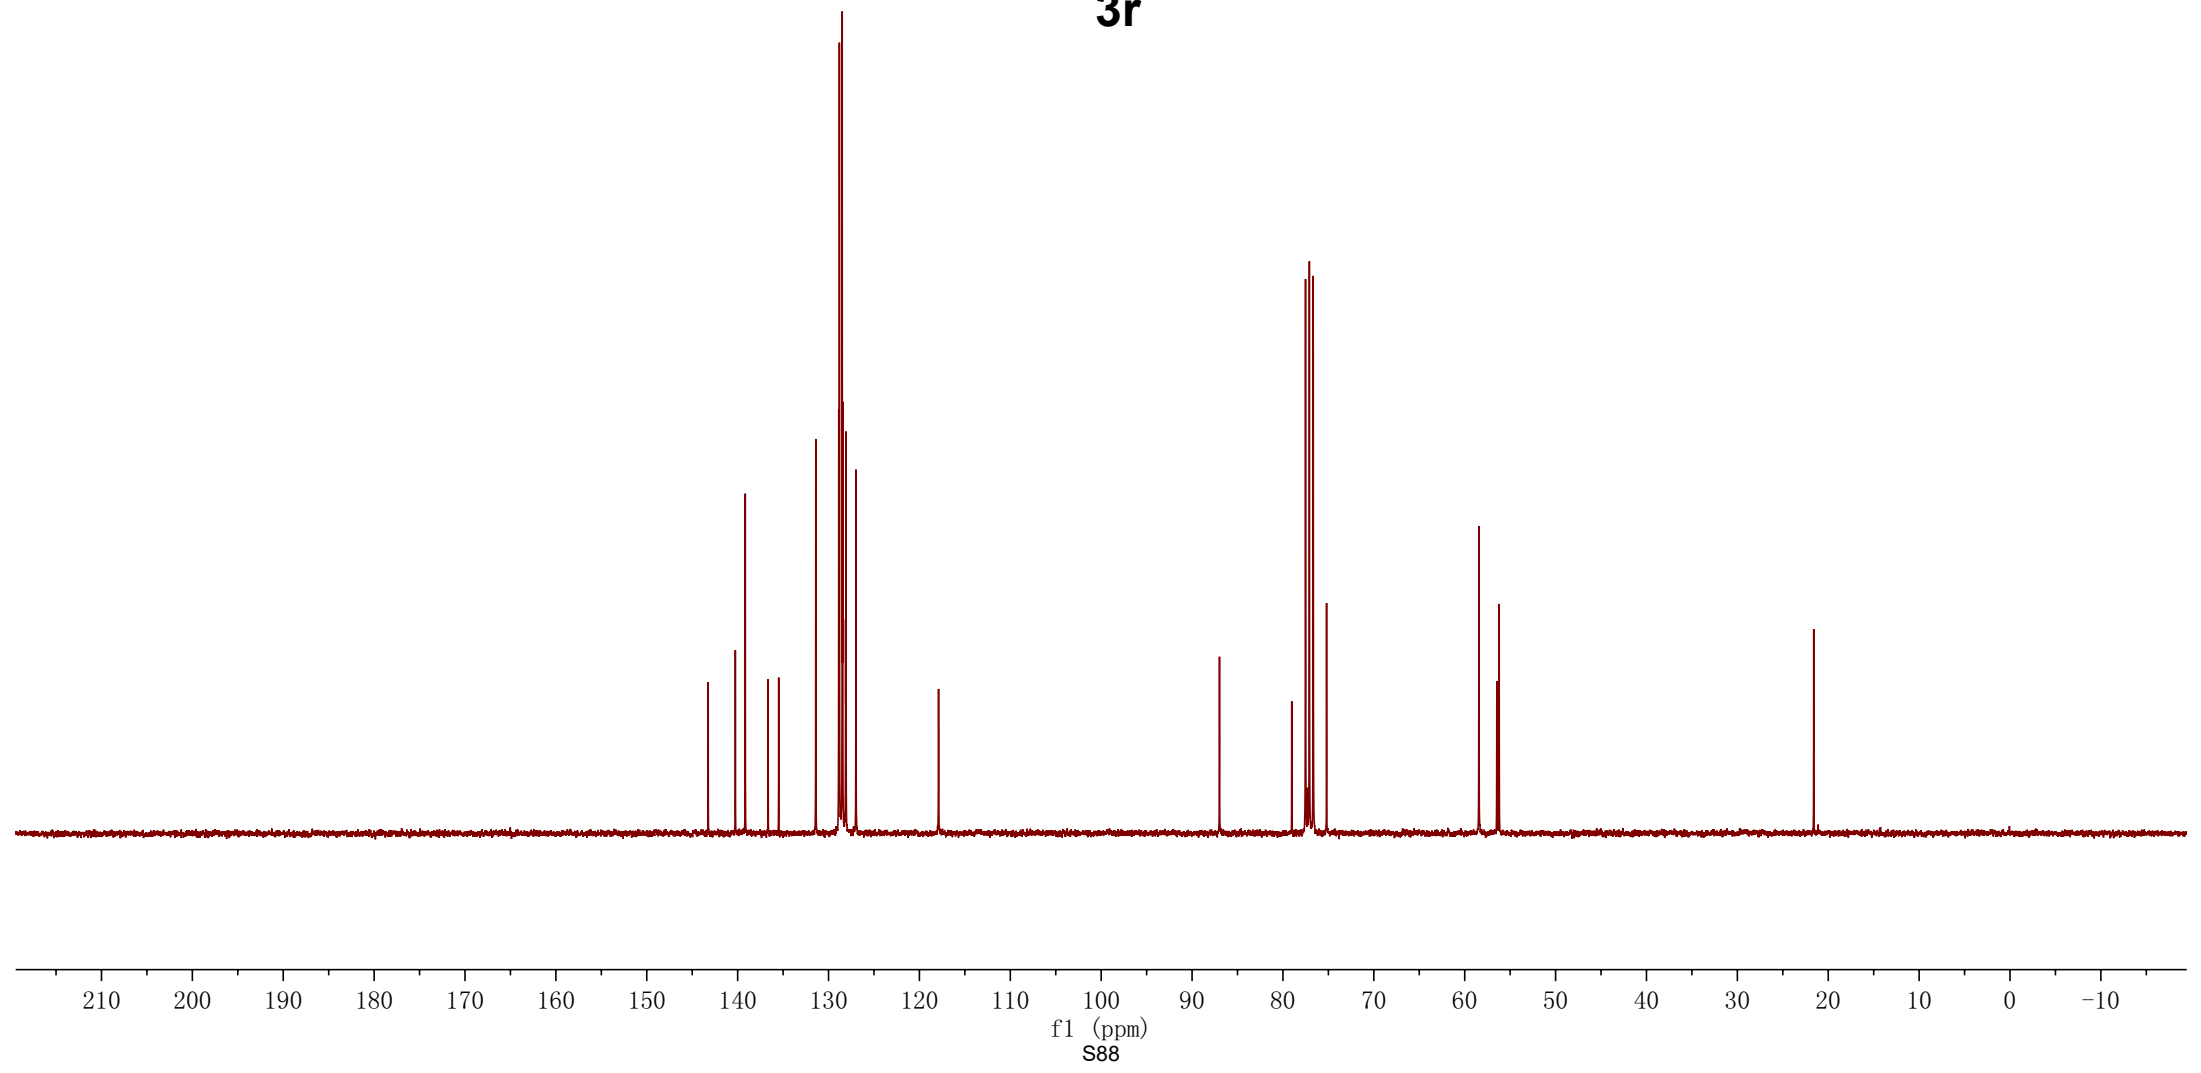

7.297  
7.293  
7.275  
7.241  
7.238  
7.225  
7.220  
7.207  
7.200  
7.160  
7.155  
7.144

5.427  
5.422  
5.387  
5.383  
5.381  
4.928

4.433  
4.403  
4.366  
4.336

3.476  
3.193  
3.002  
2.998

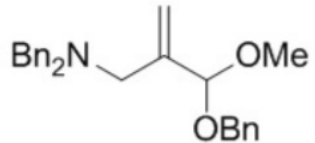

CDCl<sub>3</sub>, 400 MHz

5a

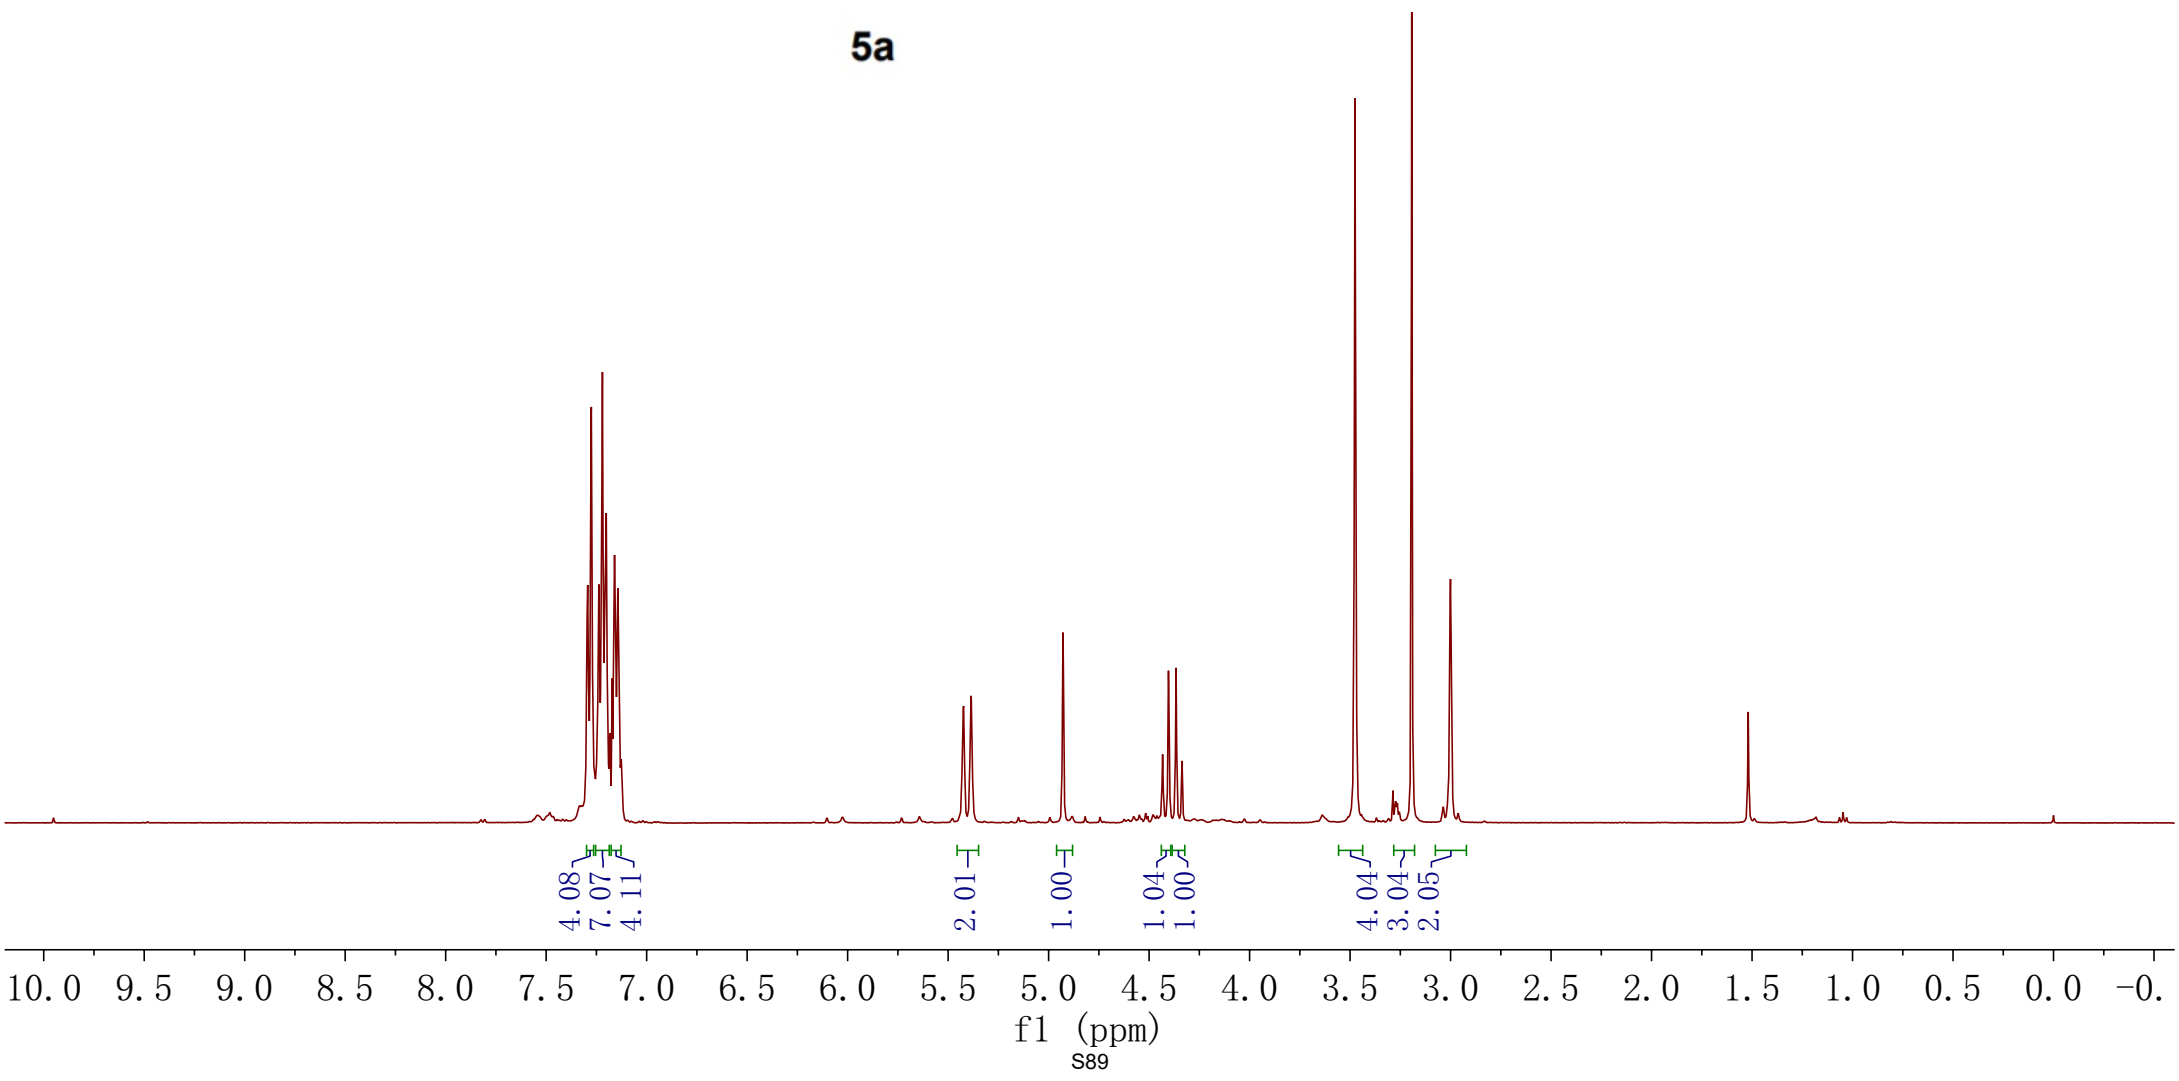

142.87  
139.57  
138.09  
128.66  
128.35  
128.26  
127.80  
127.52  
126.86  
115.56  
101.80  
67.46  
58.19  
55.45  
53.53

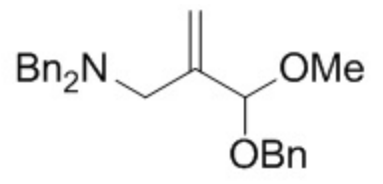

CDCl<sub>3</sub>, 100 MHz

5a

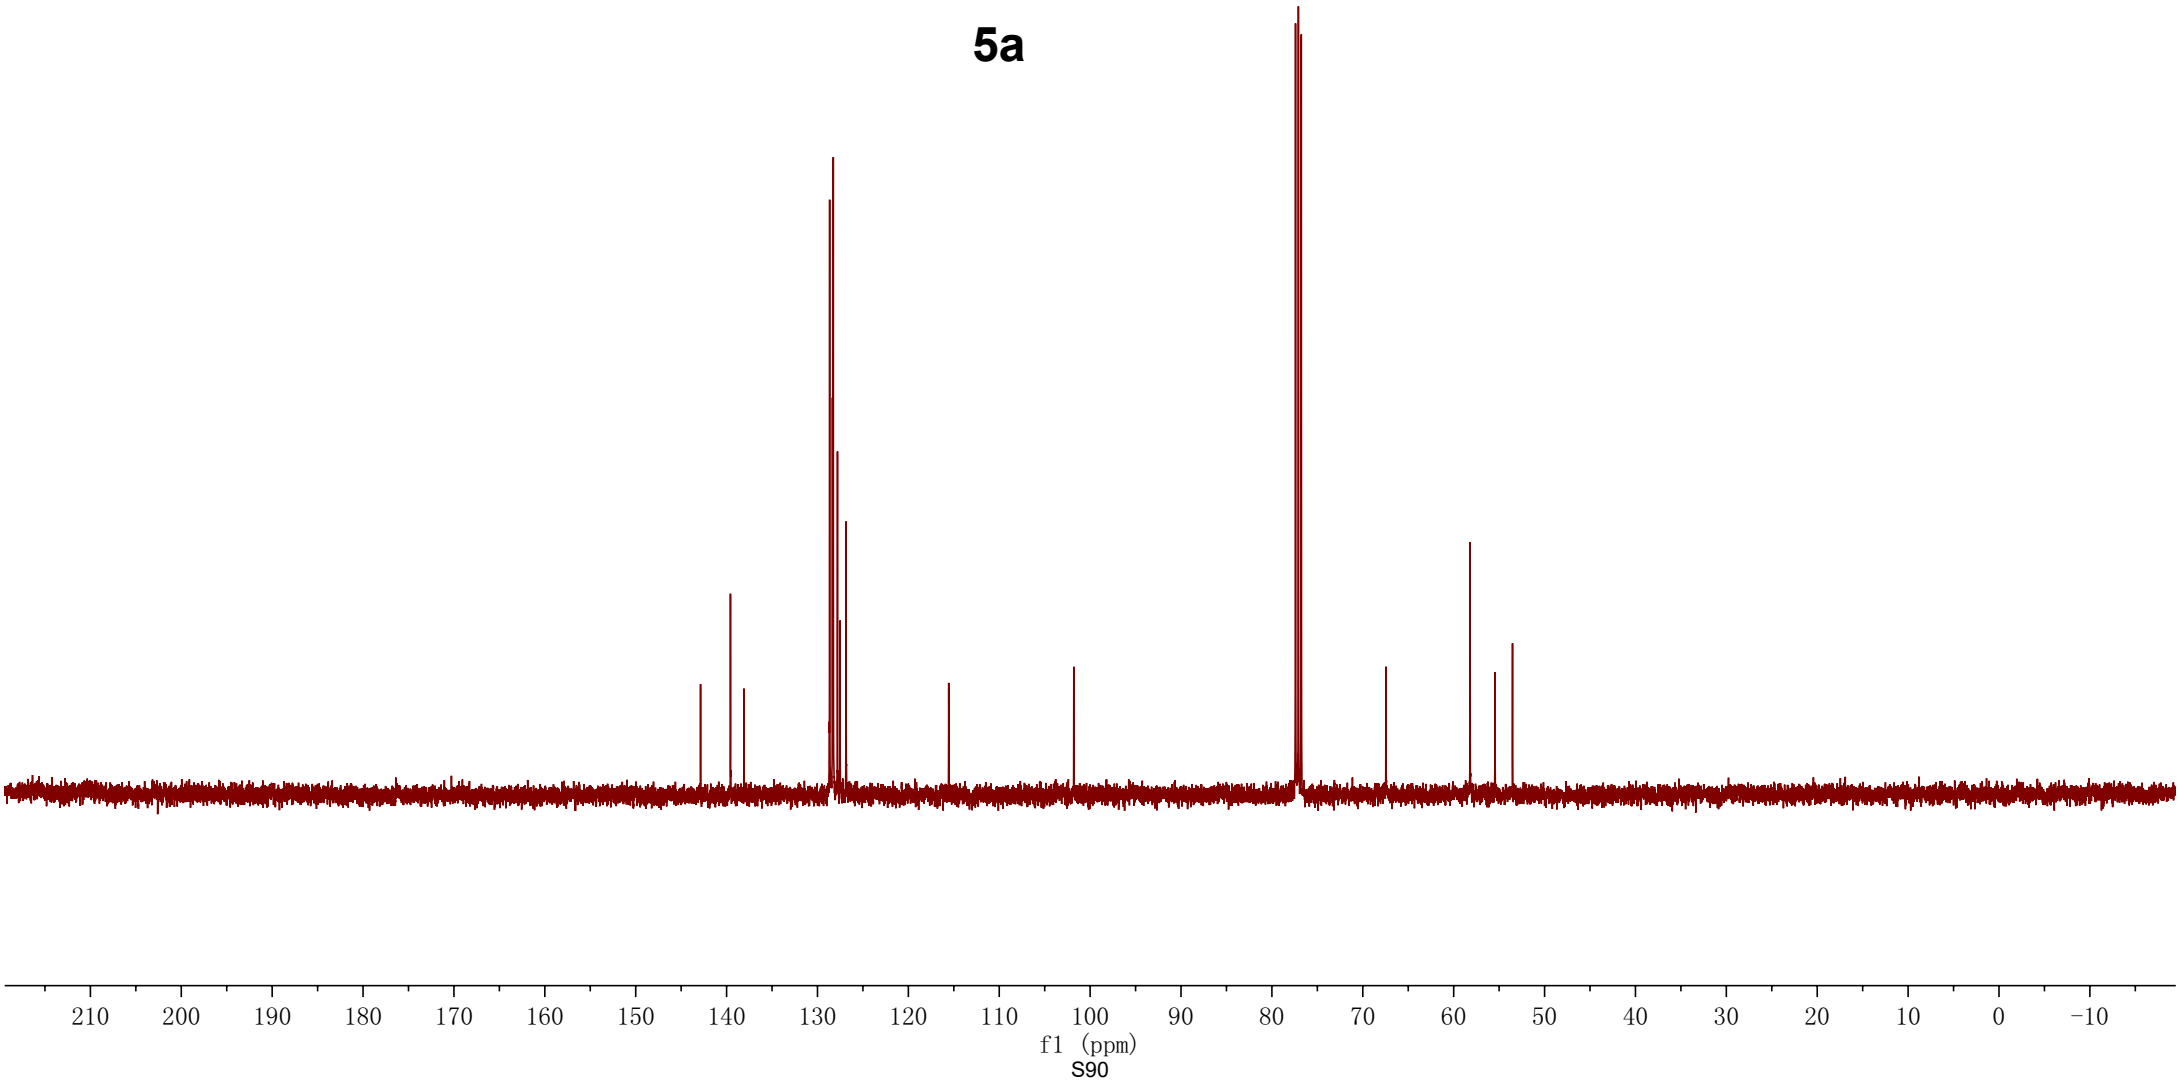

7.36  
7.34  
7.31  
7.29  
7.27  
7.25  
7.23  
7.22  
7.20  
7.15  
7.13  
6.83  
6.81

5.48  
5.44

4.96

4.44  
4.41  
4.38  
4.35

3.79  
3.58  
3.54  
3.51  
3.25  
3.06

1.56

-0.00

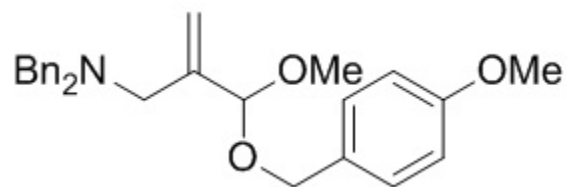

CDCl<sub>3</sub>, 400 MHz

5b

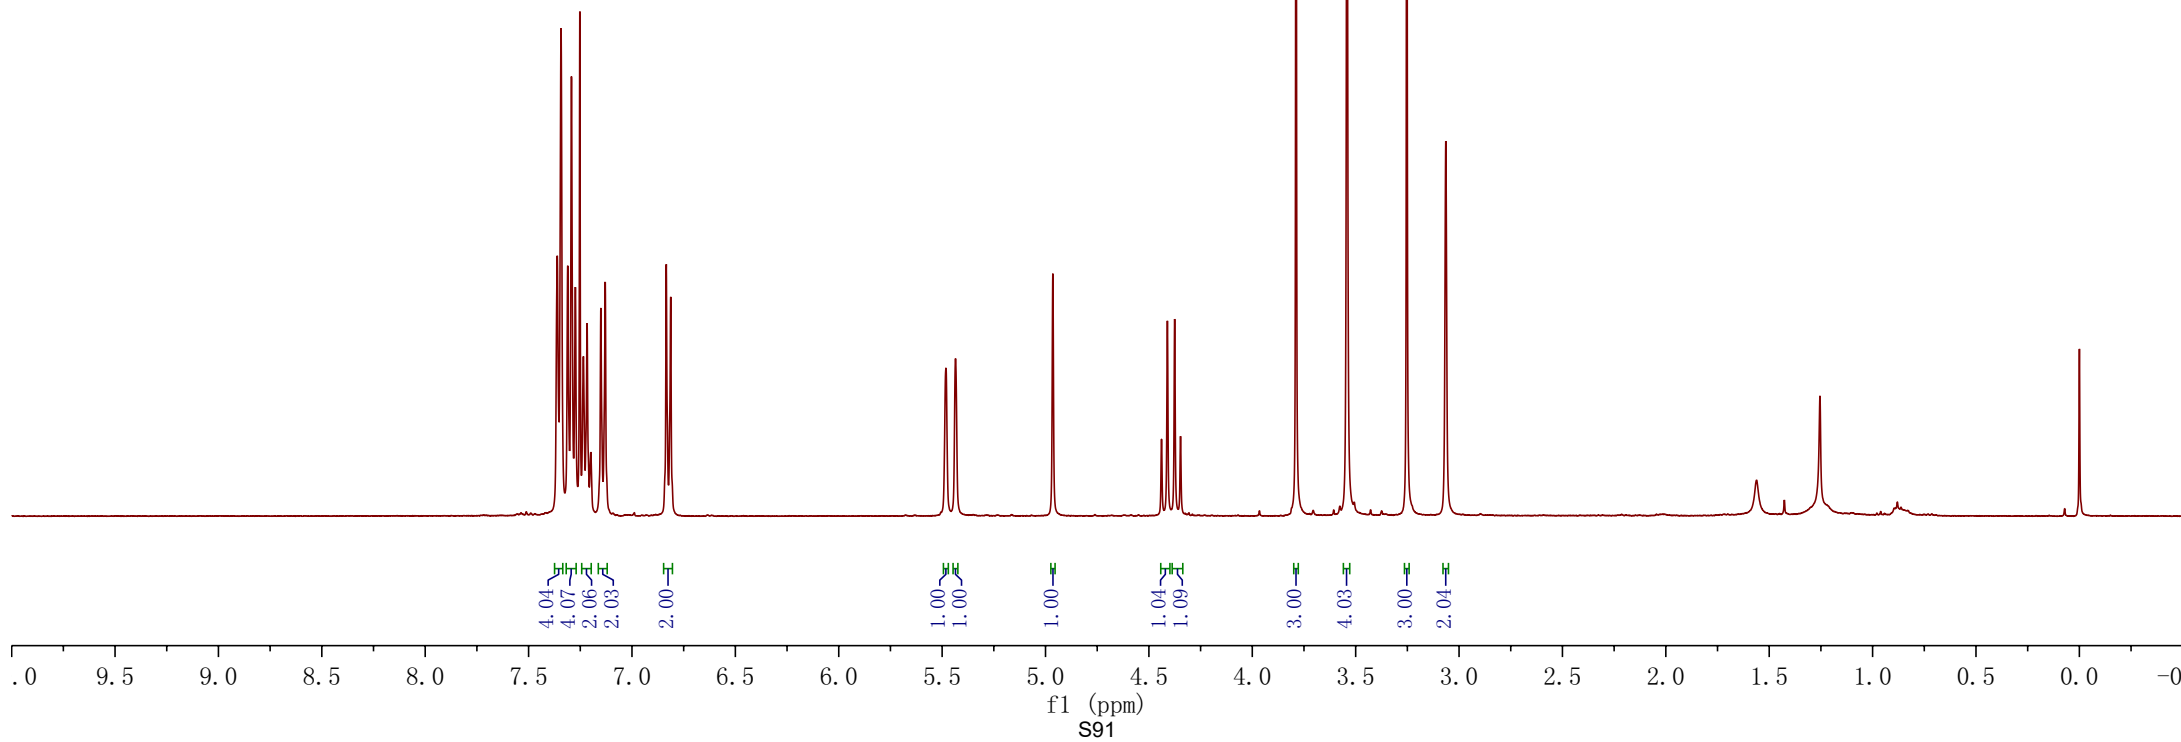

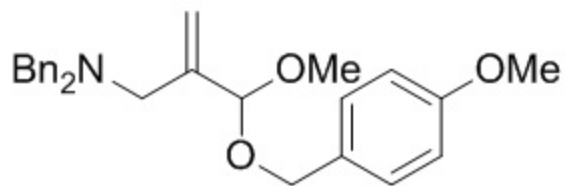

CDCl<sub>3</sub>, 75 MHz

5b

159.10

142.93

139.57

130.13

129.42

128.63

128.21

126.81

115.39

113.73

101.59

67.25

58.15

55.42

55.28

53.45

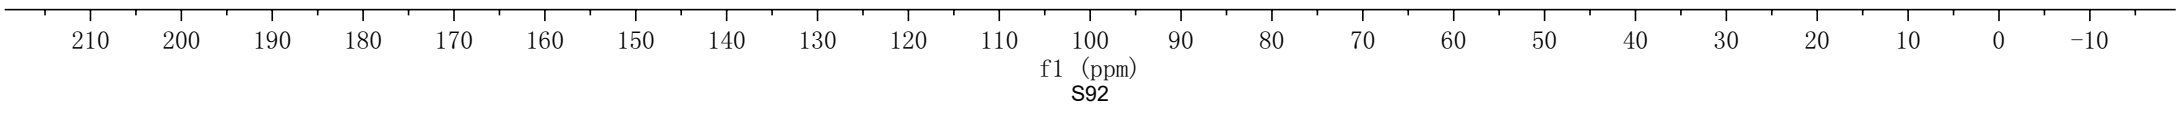

7.40  
7.38  
7.35  
7.34  
7.30  
7.29  
7.27  
7.23  
7.21  
7.19  
7.06  
7.04

5.48  
5.44

4.99

4.42  
4.39  
4.35  
4.32

3.58  
3.55  
3.52  
3.49  
3.25  
3.09  
3.06  
3.04  
3.00

1.26

0.00

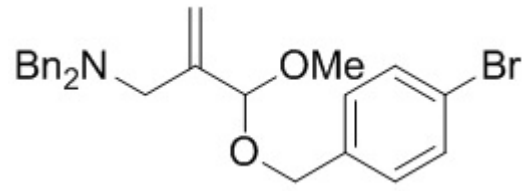

CDCl<sub>3</sub>, 400 MHz

5c

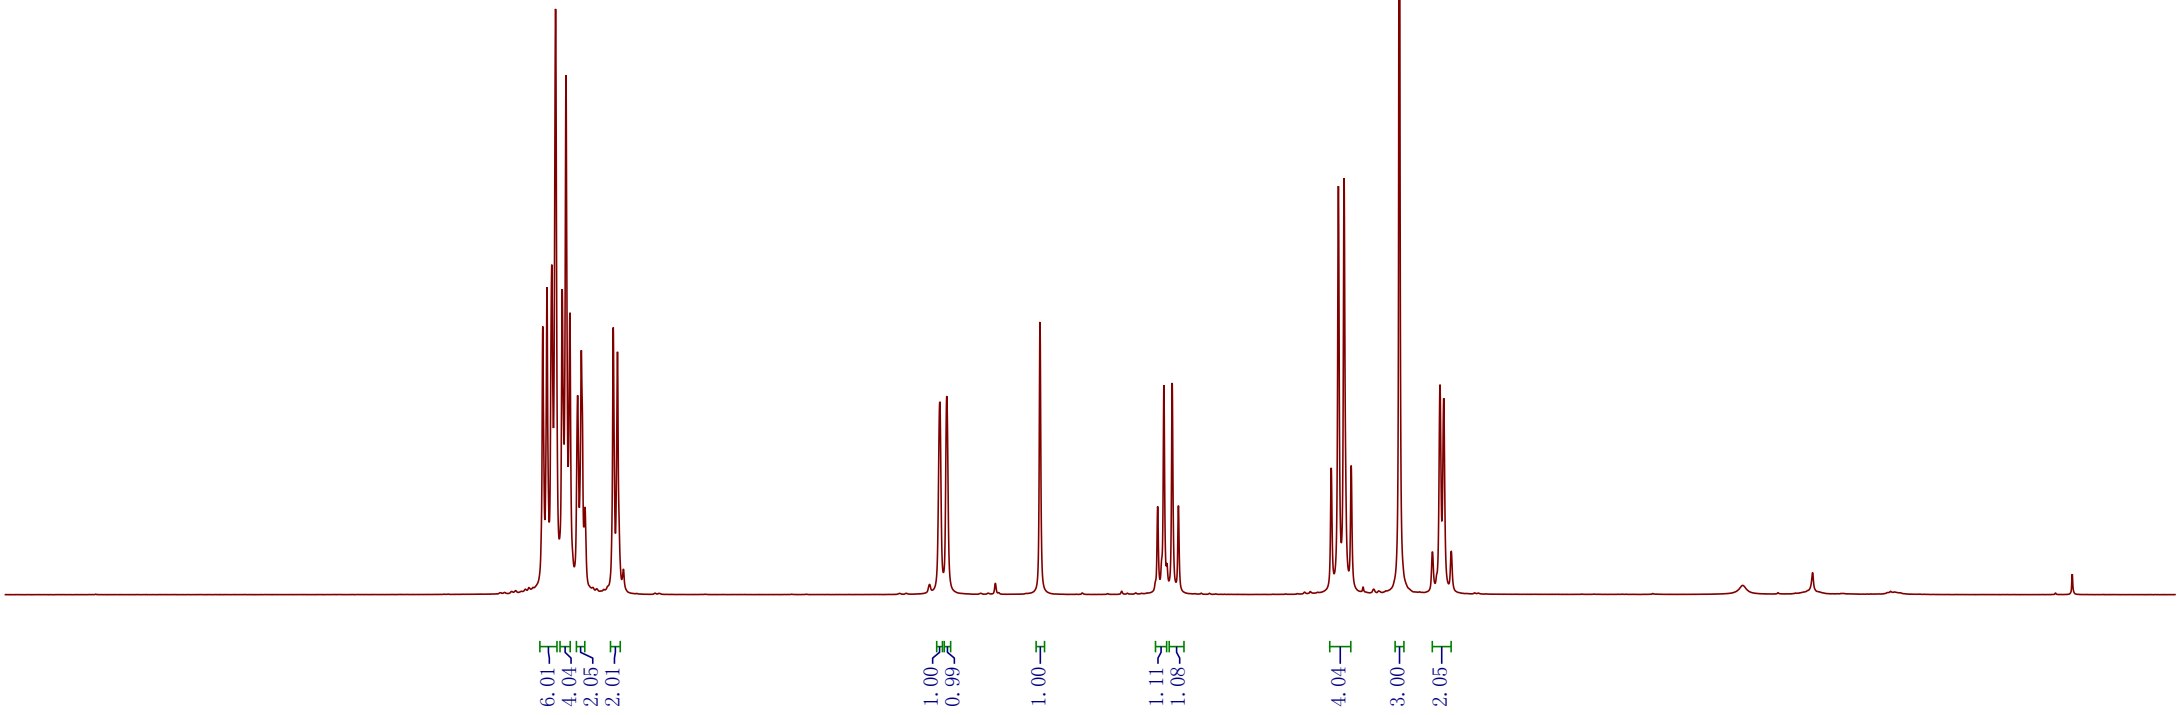

6.01  
4.04  
2.05  
2.01

1.00  
0.99

1.00

1.11  
1.08

4.04  
3.00  
2.05

.0 9.5 9.0 8.5 8.0 7.5 7.0 6.5 6.0 5.5 5.0 4.5 4.0 3.5 3.0 2.5 2.0 1.5 1.0 0.5 0.0 -0

f1 (ppm)

S93

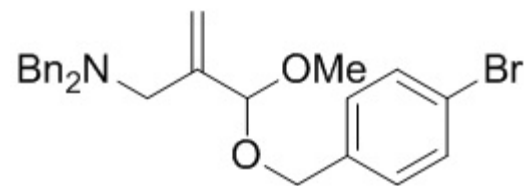

CDCl<sub>3</sub>, 75 MHz

**5c**

142.73  
139.54  
137.18  
131.44  
129.38  
128.67  
128.29  
126.92  
121.35  
115.81  
101.73  
66.49  
58.24  
55.56  
53.64

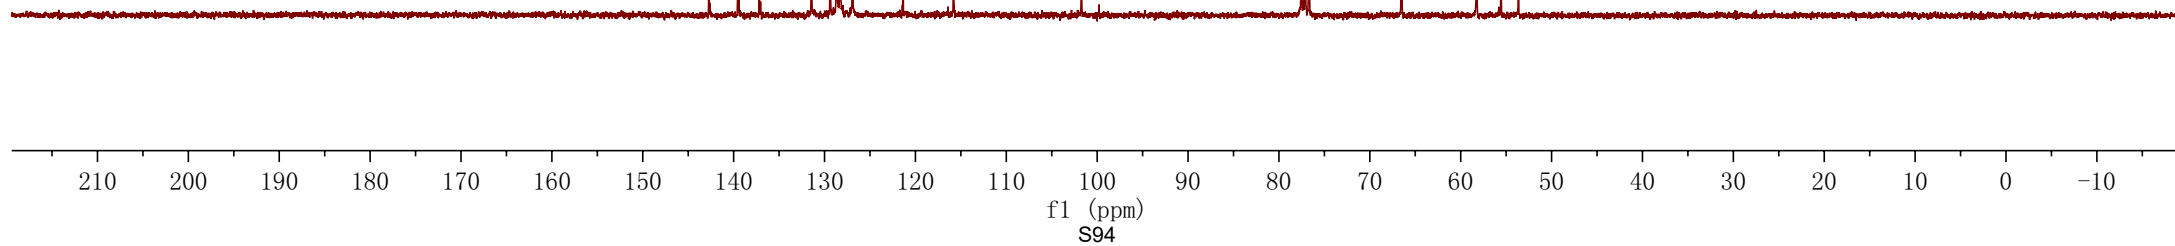



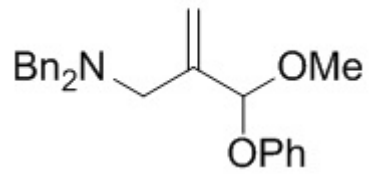

CDCl<sub>3</sub>, 400 MHz

5d

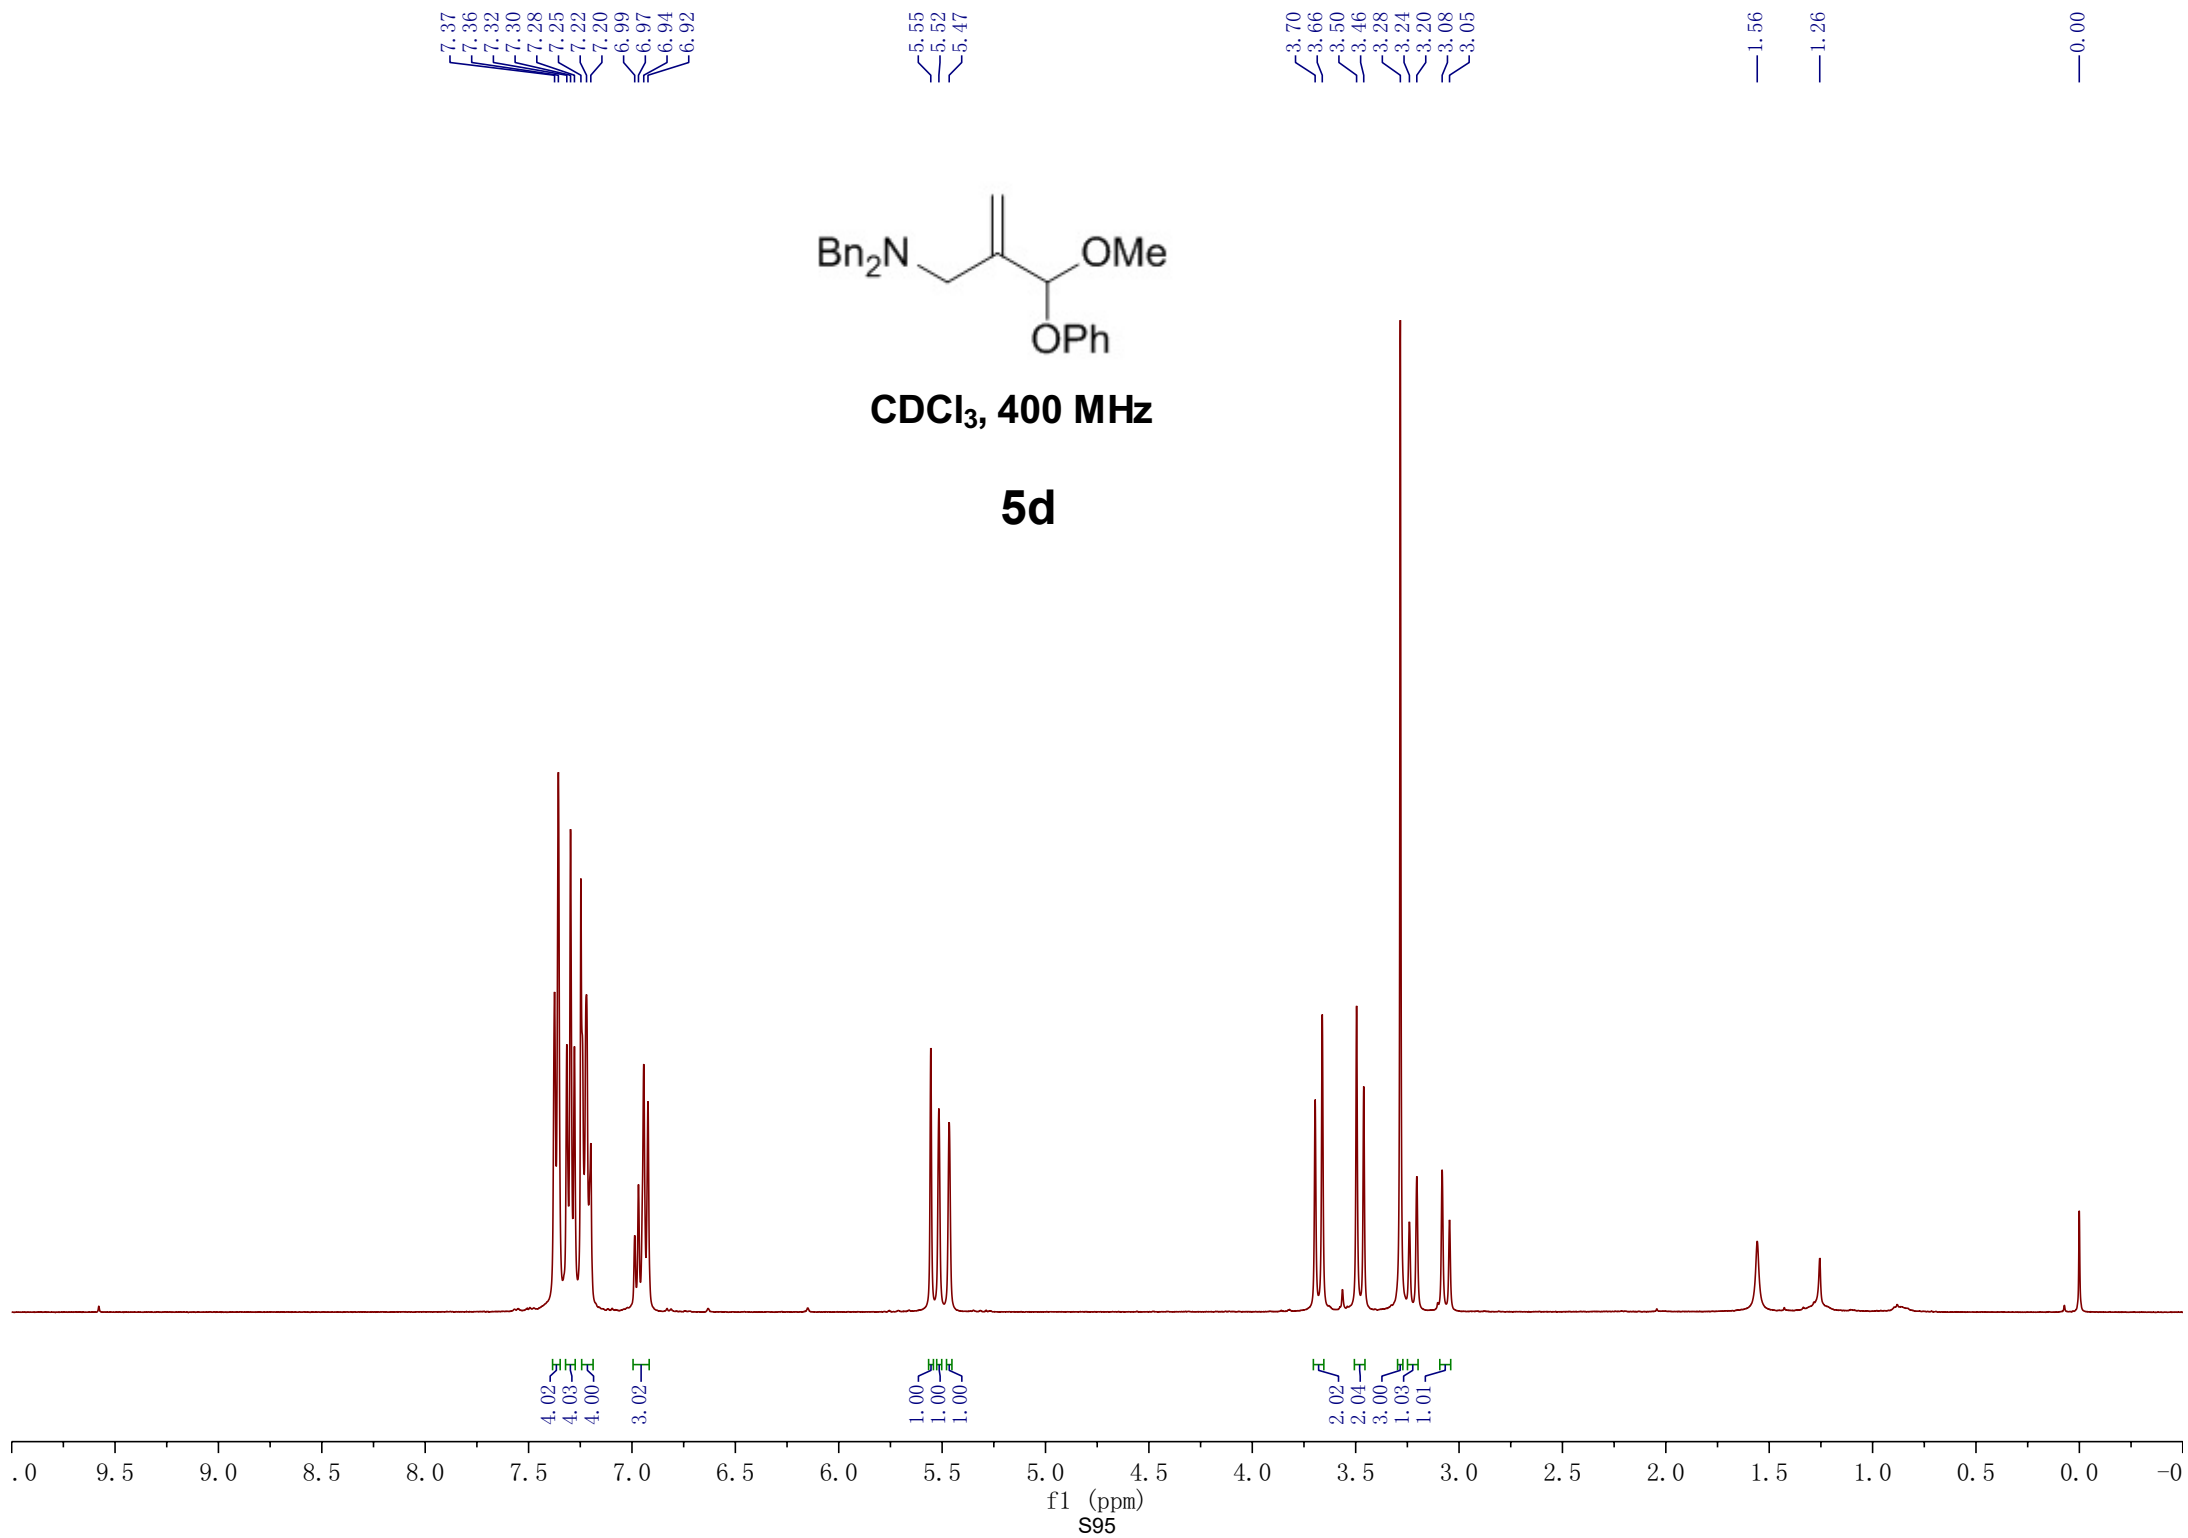

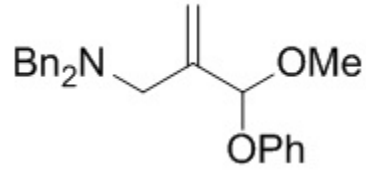

CDCl<sub>3</sub>, 75 MHz

5d

157.25

142.53

139.41

129.39

128.69

128.27

126.89

121.86

117.04

116.33

101.99

58.21

55.57

54.20

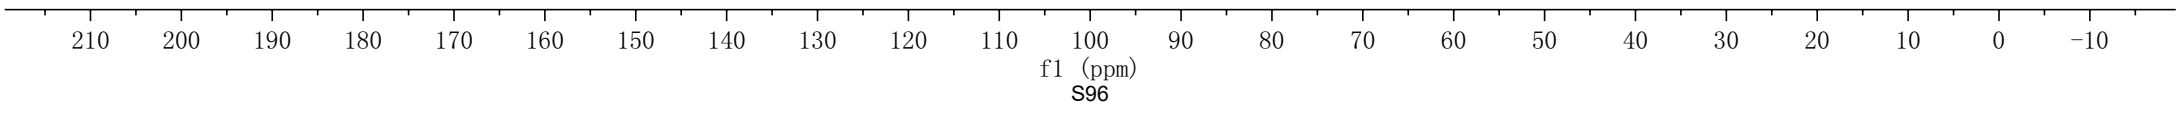

7.34  
7.32  
7.31  
7.30  
7.29  
7.27  
7.27  
7.26  
7.26  
7.25  
7.23  
7.23  
7.22  
7.21  
7.19

5.55  
5.51

5.22

4.53  
4.50  
4.47  
4.44

3.54

3.11

0.00

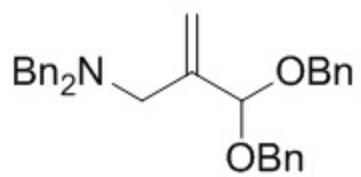

CDCl<sub>3</sub>, 400 MHz

5e

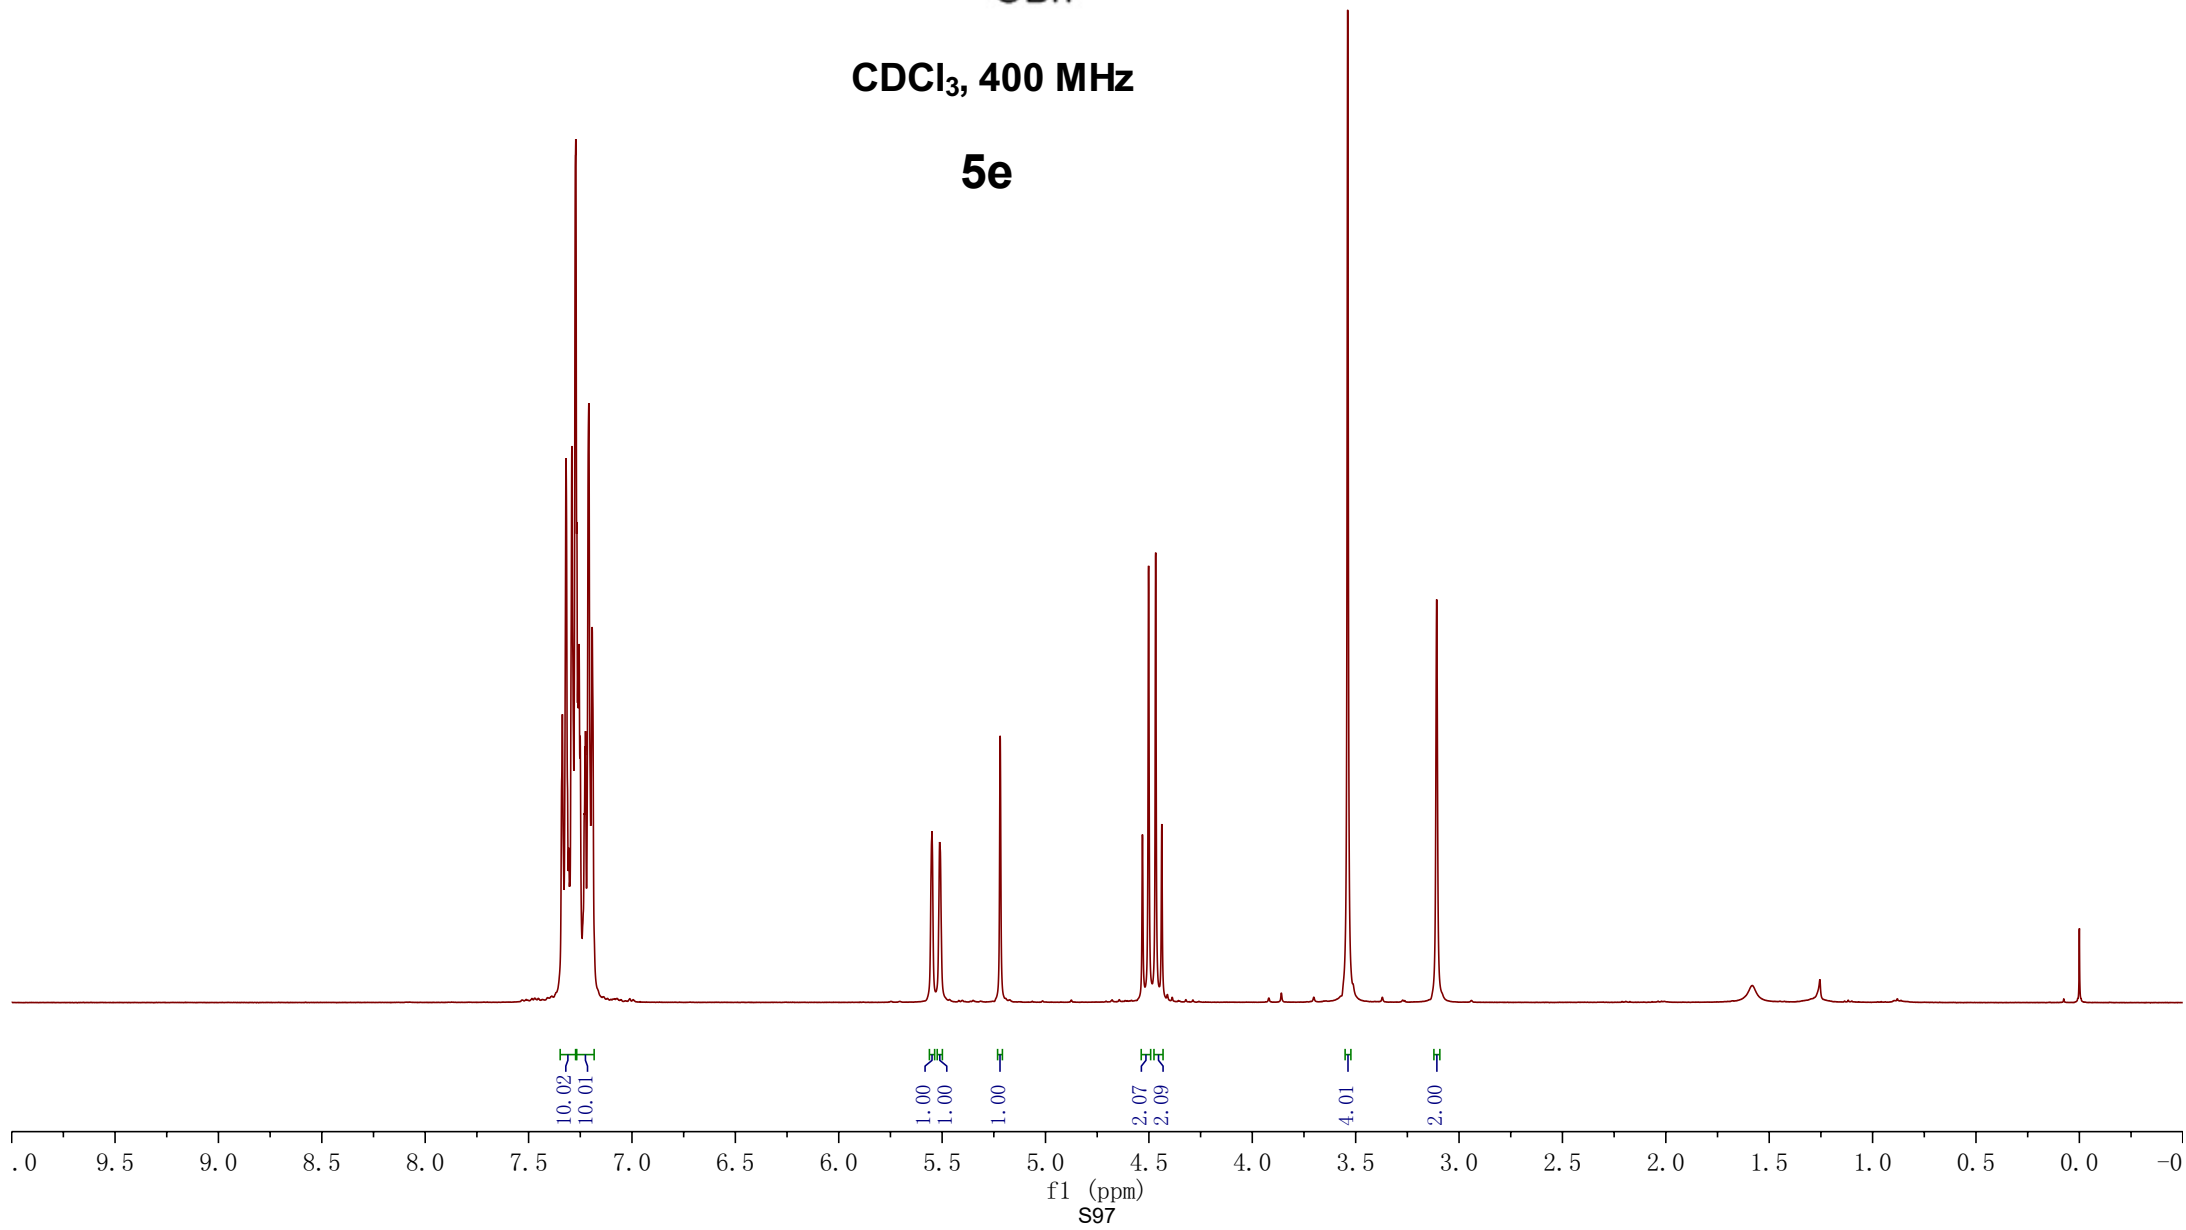

142.92  
139.52  
138.10  
128.71  
128.35  
128.26  
127.80  
127.51  
126.85  
115.91  
100.04  
67.44  
58.20  
55.63

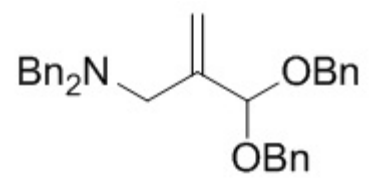

CDCl<sub>3</sub>, 75 MHz

5e

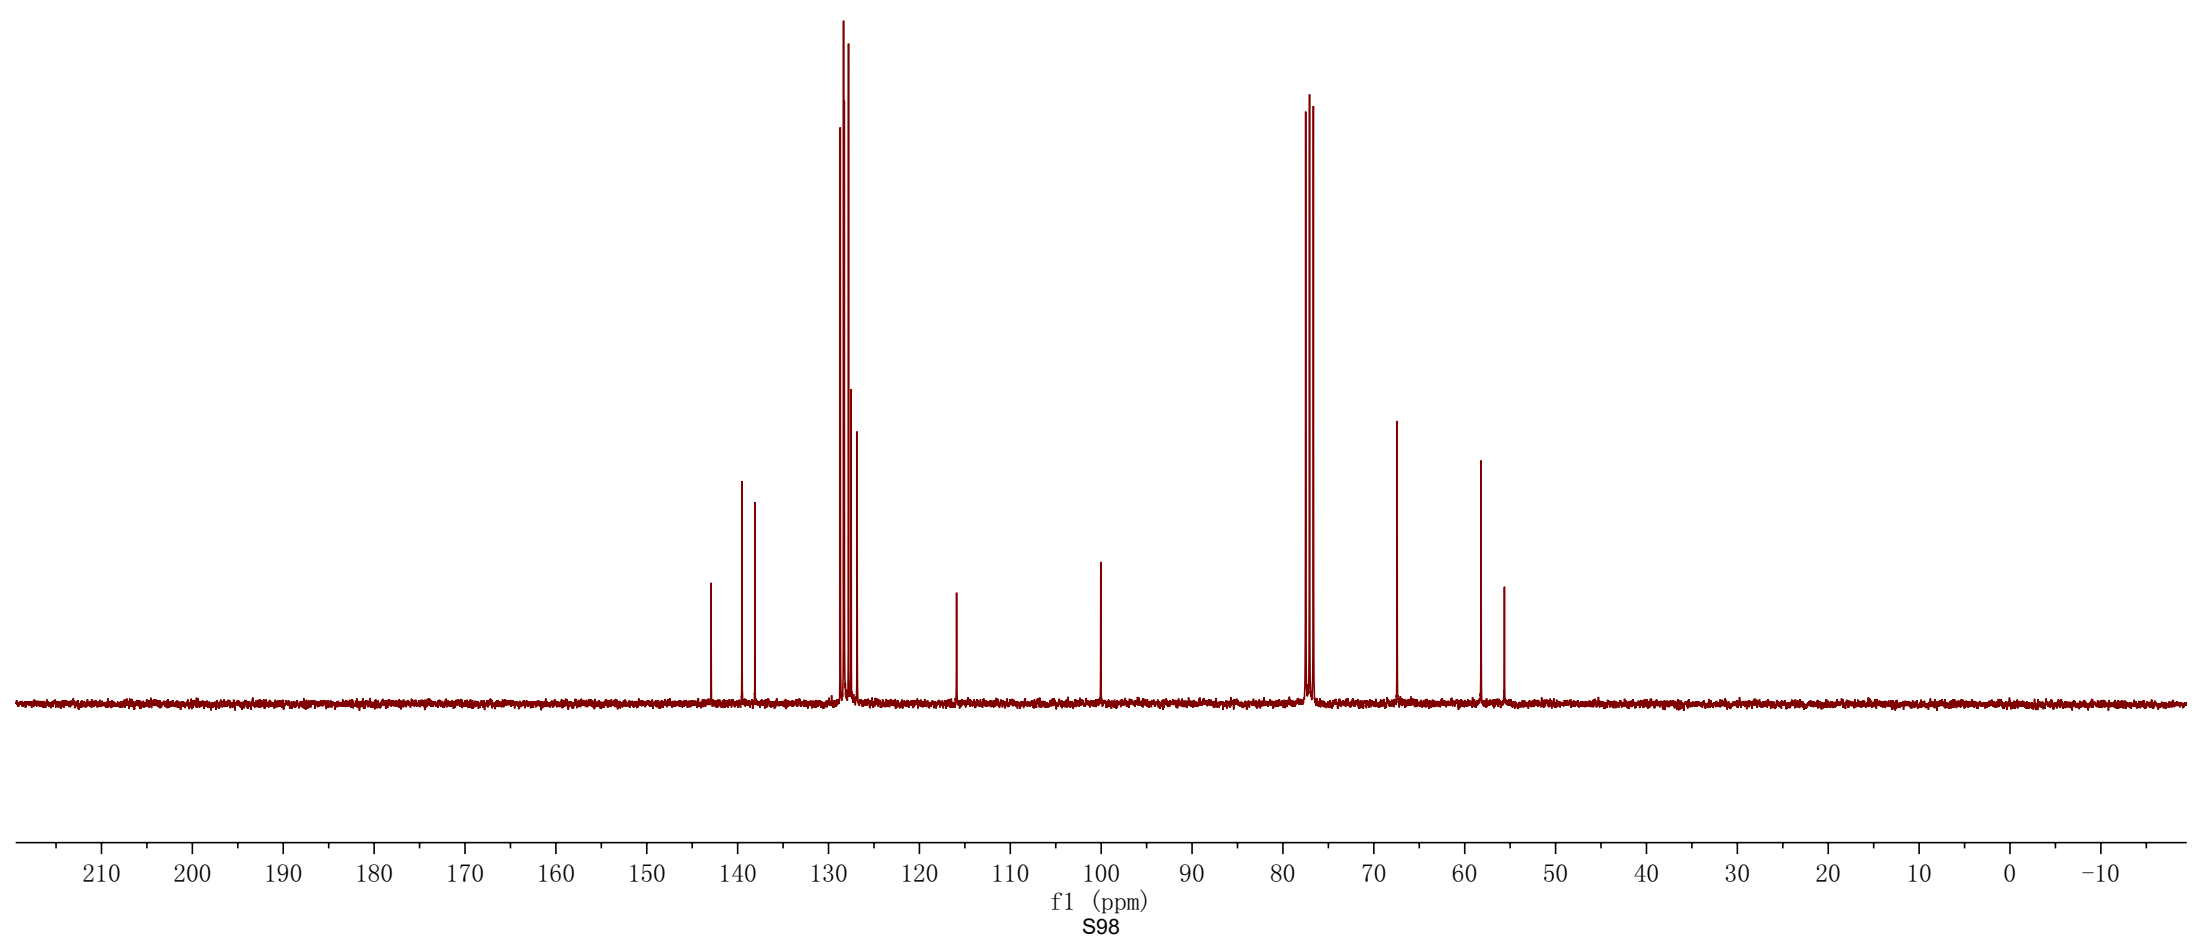

7.36  
7.34  
7.31  
7.29  
7.27  
7.25  
7.24  
7.23  
7.21  
7.20

5.87  
5.86  
5.84  
5.83  
5.82  
5.80  
5.79  
5.78  
5.49  
5.21  
5.17  
5.13  
5.12  
5.09

4.50  
4.47  
4.45  
4.42  
4.01  
4.00  
3.96  
3.94  
3.93  
3.55  
3.51

3.09

1.54

1.25

0.07  
0.00

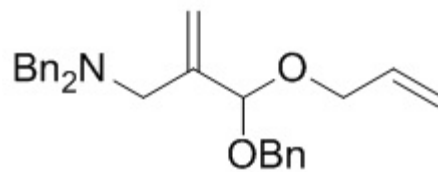

CDCl<sub>3</sub>, 400 MHz

5f

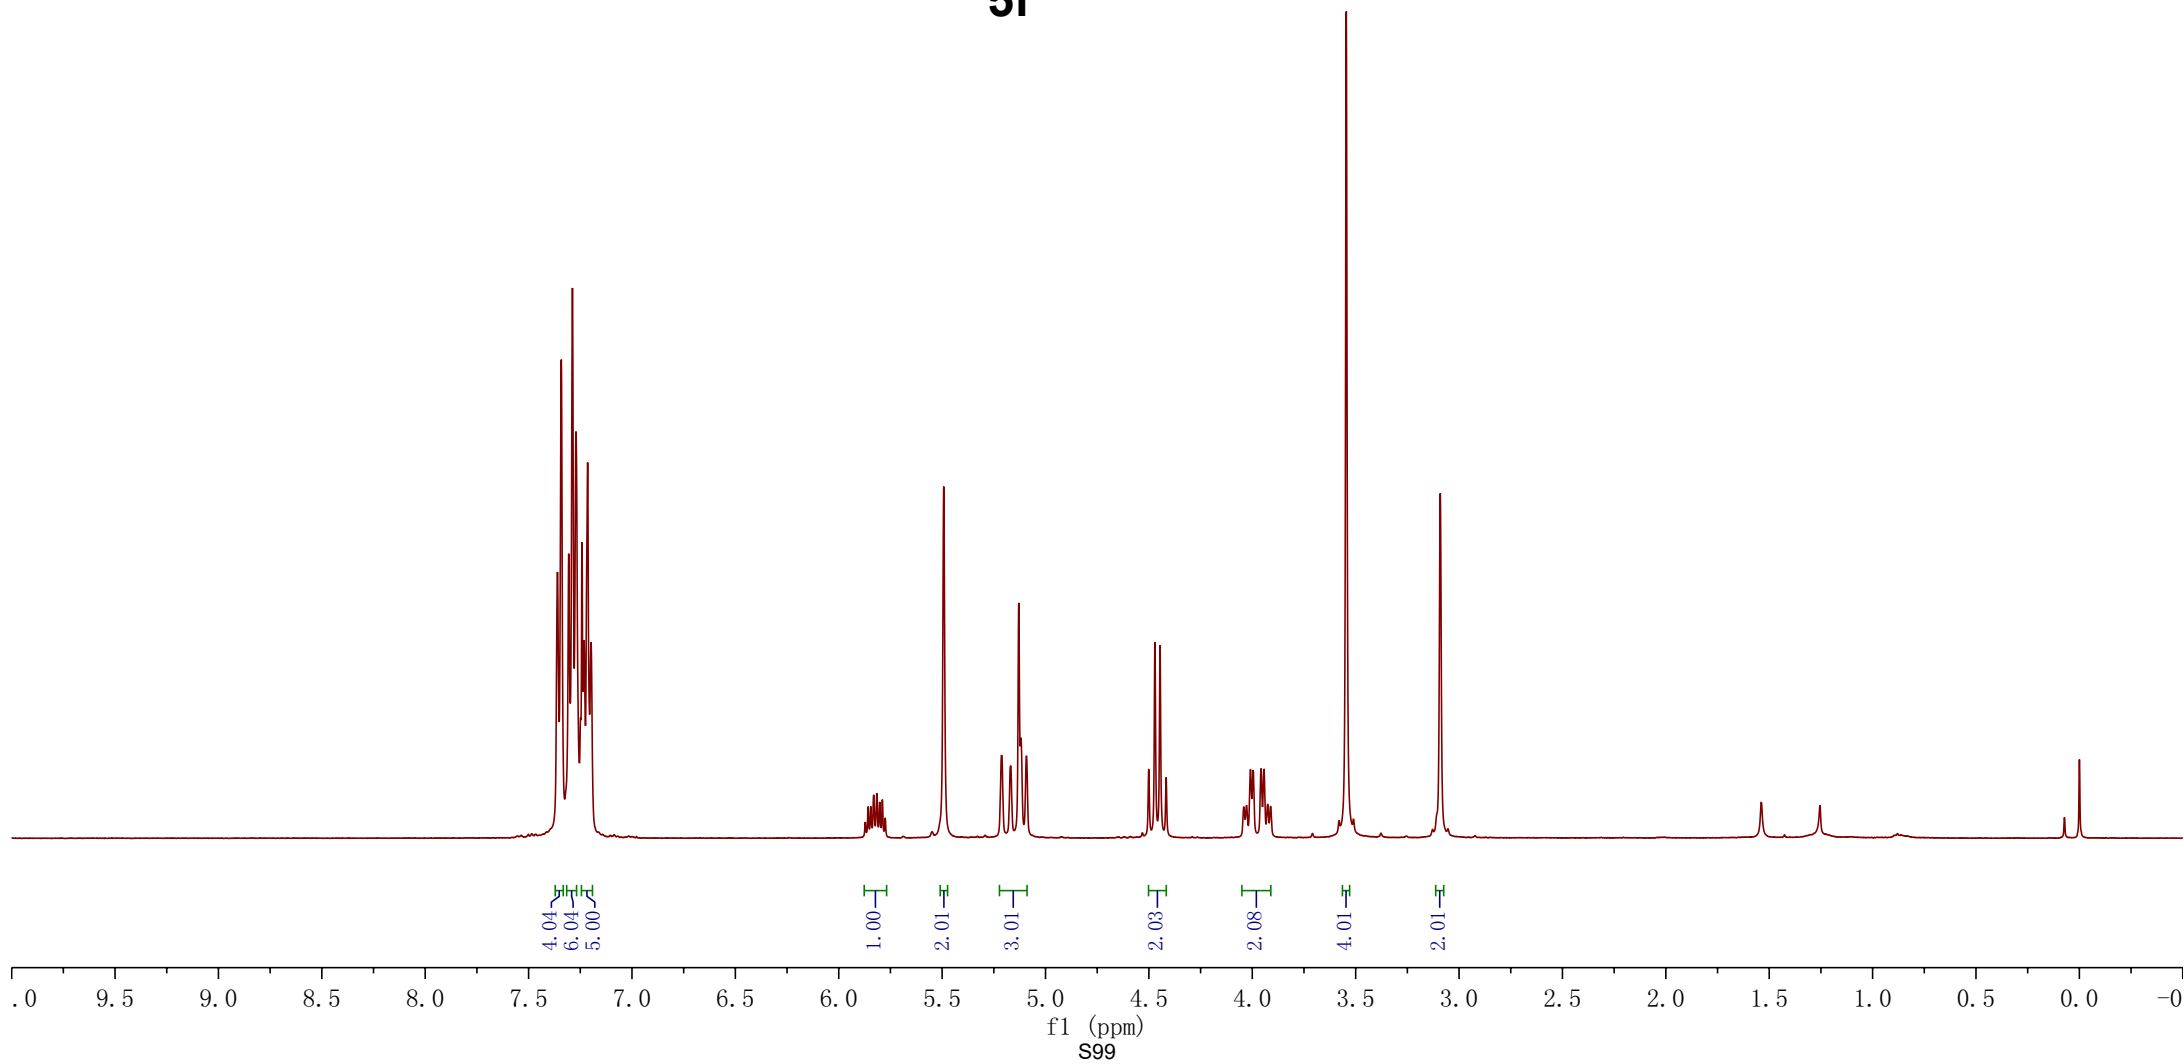

143.03  
139.54  
138.09  
134.51  
128.68  
128.32  
128.23  
127.79  
127.48  
126.83  
116.75  
115.63  
100.23  
67.34  
66.87  
58.18  
55.51

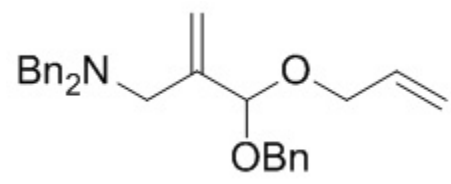

CDCl<sub>3</sub>, 75 MHz

5f

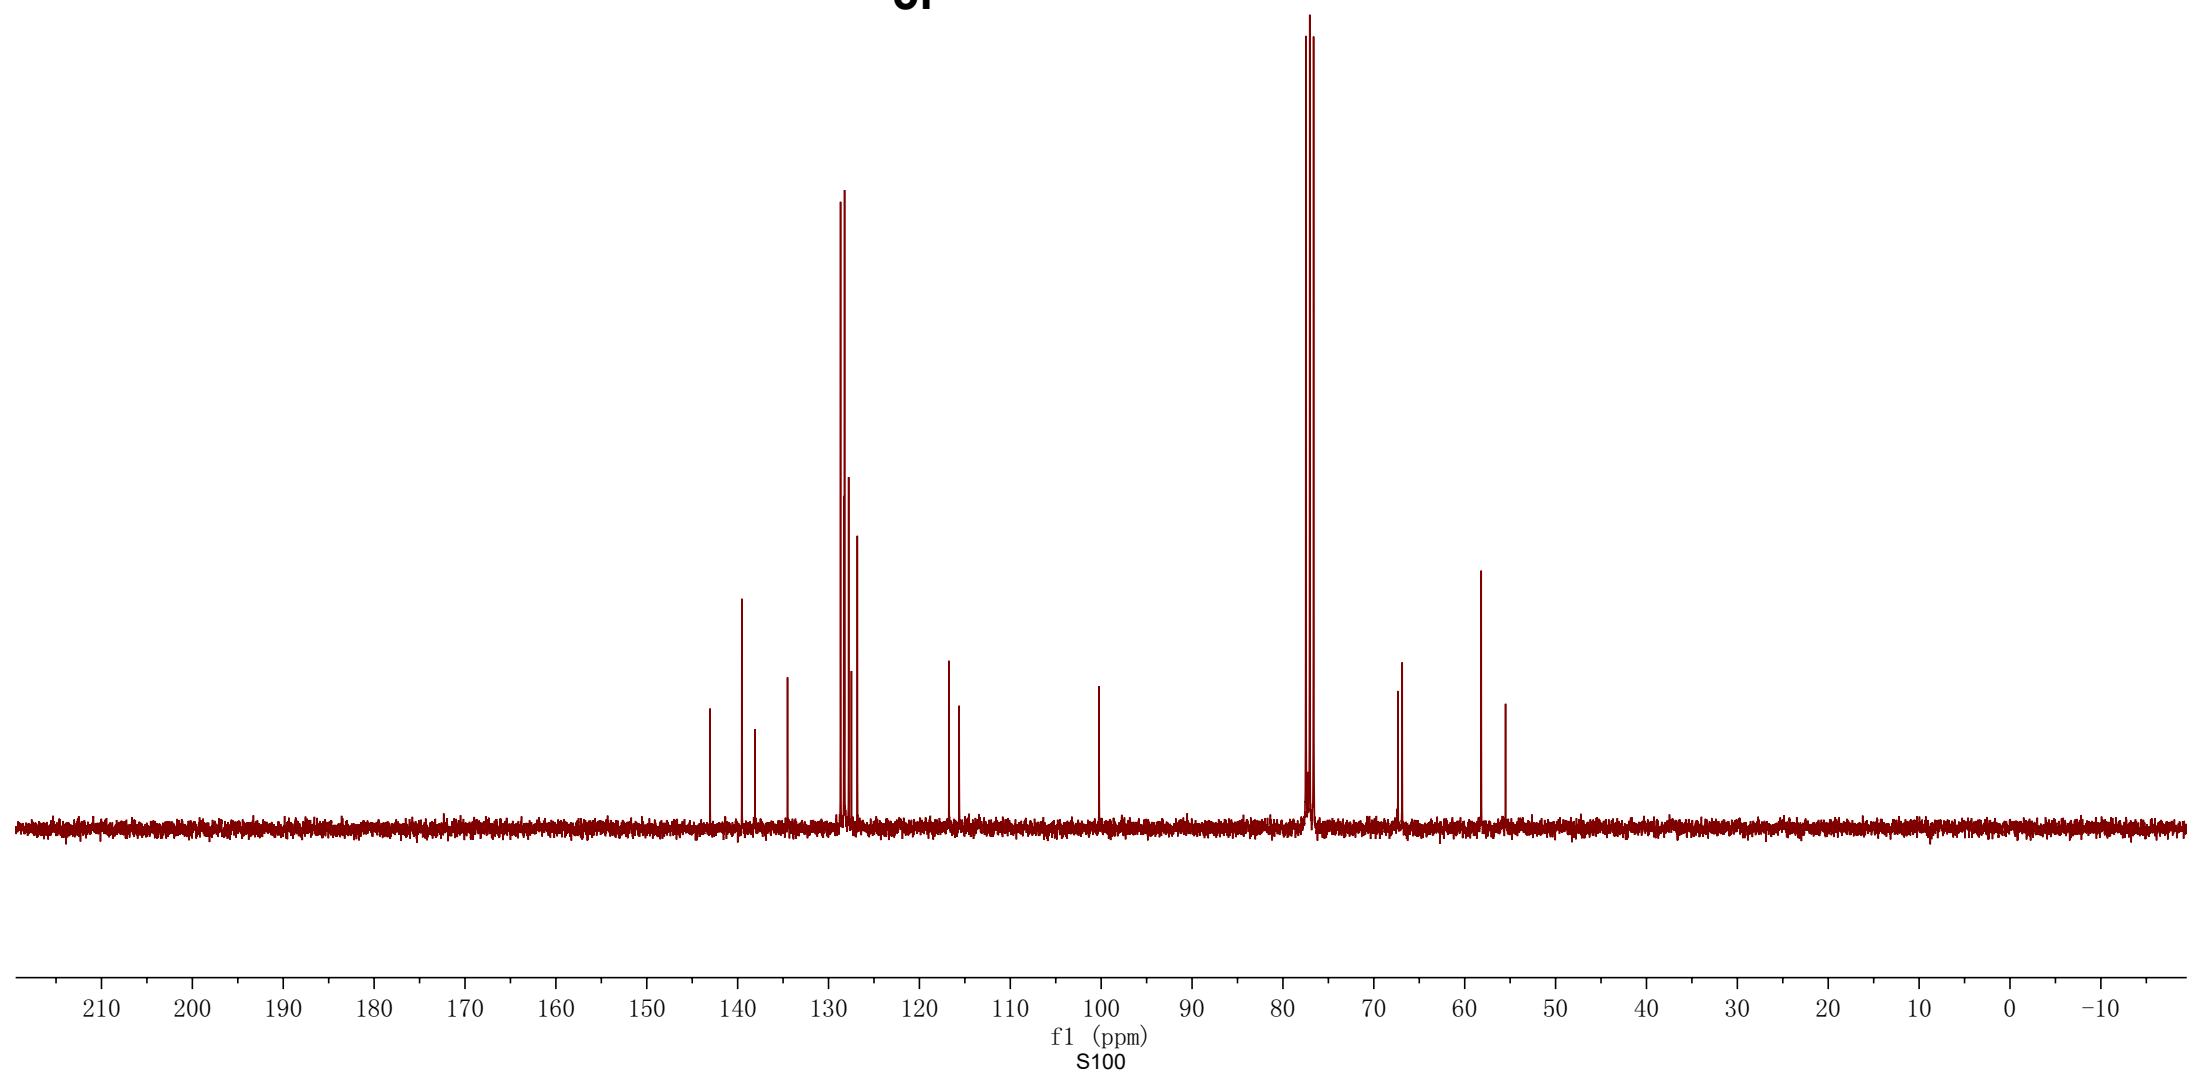

7.37  
7.35  
7.31  
7.29  
7.27  
7.25  
7.23  
7.21  
7.20

5.50  
5.29

4.55  
4.52  
4.46  
4.43

4.21  
4.18  
4.17  
4.11  
4.09

3.56  
3.53  
3.49

3.14  
3.11  
3.08  
3.04

2.36

1.53

1.25

0.00

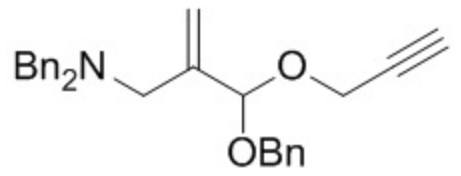

CDCl<sub>3</sub>, 400 MHz

5g

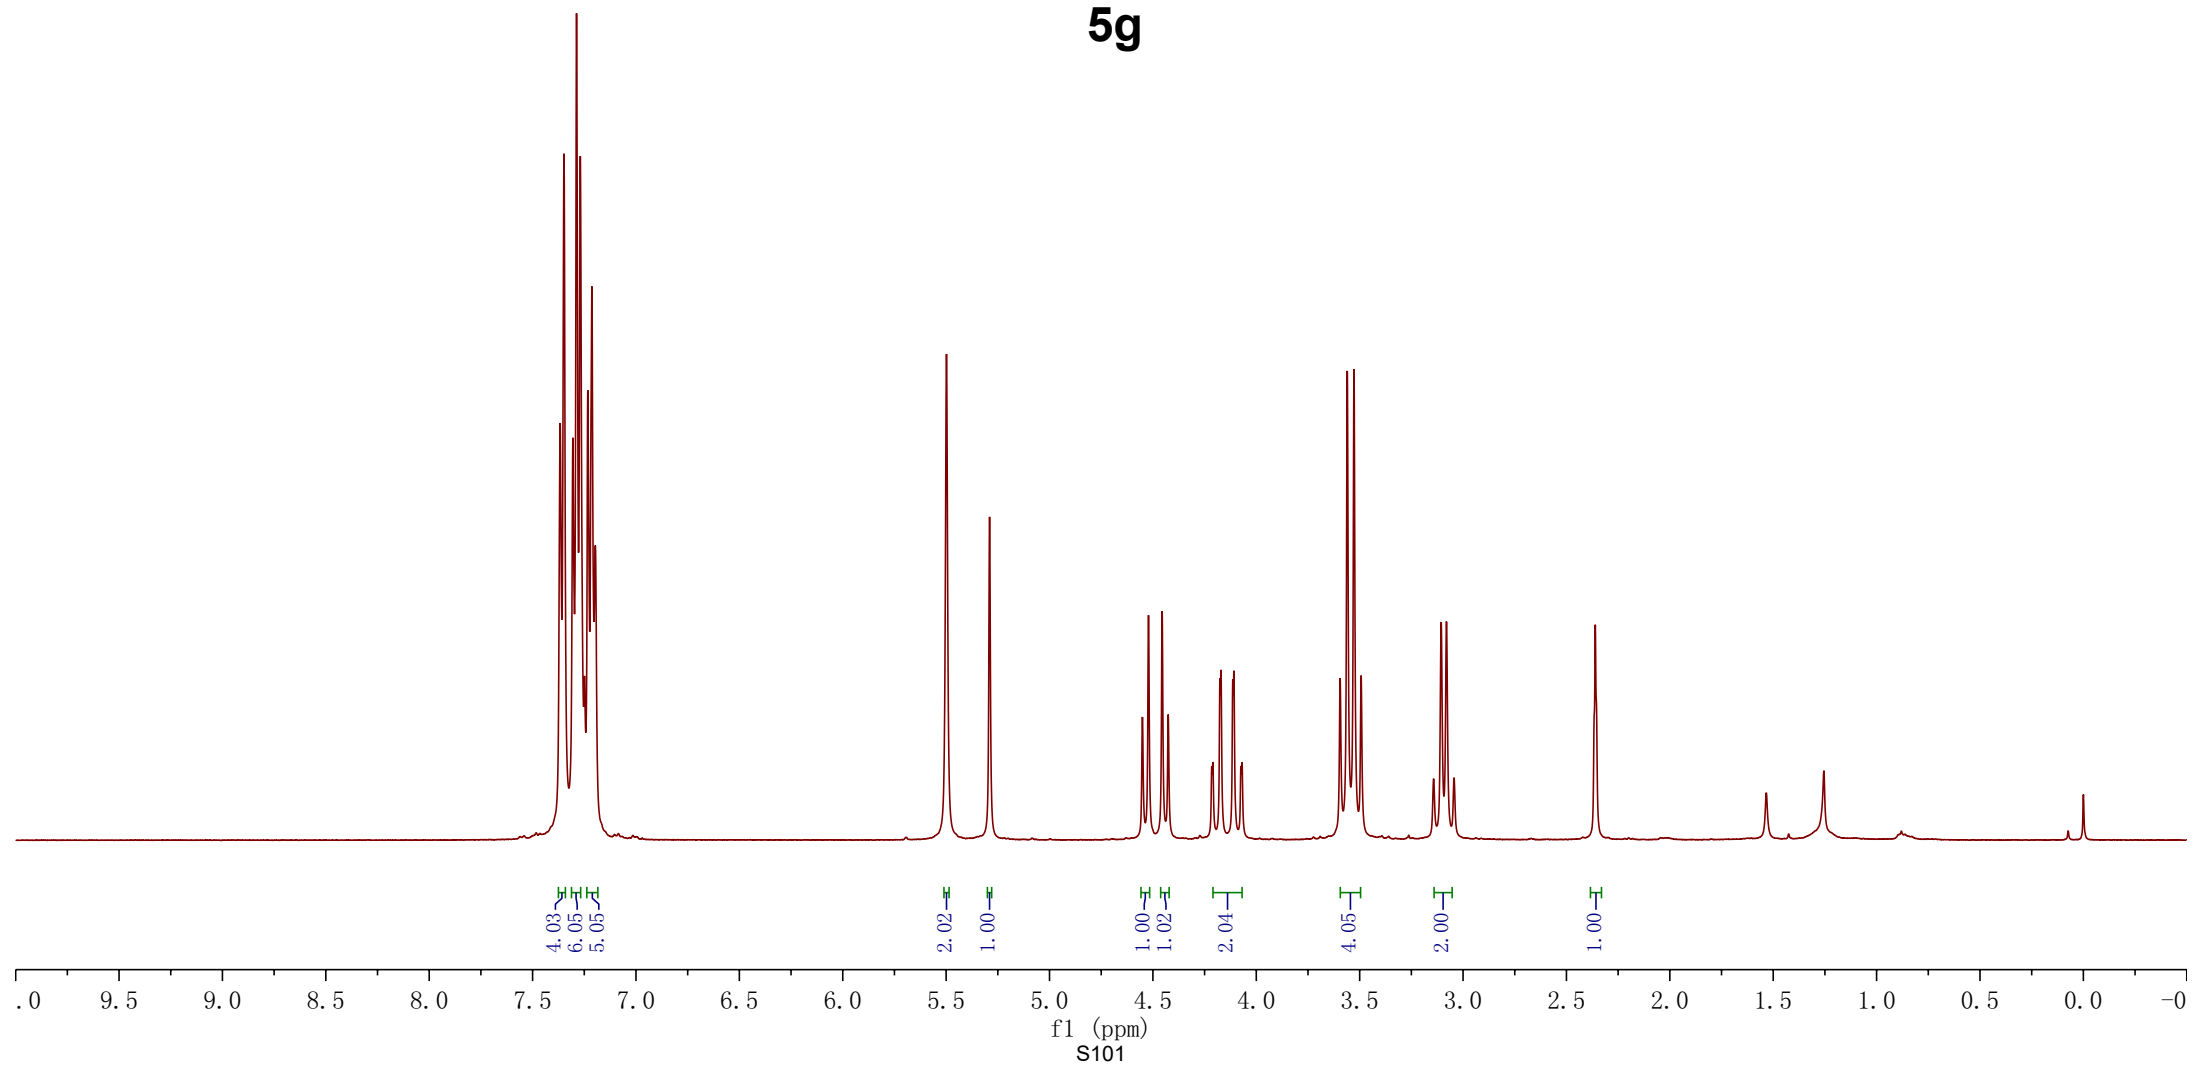

142.50  
139.48  
137.84  
128.70  
128.35  
128.25  
127.83  
127.58  
126.86  
116.17  
99.74  
79.79  
74.24  
67.79  
58.14  
55.47  
53.11

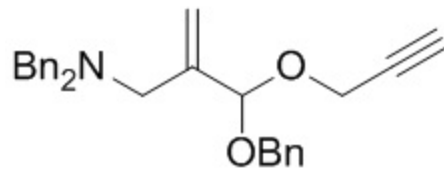

CDCl<sub>3</sub>, 75 MHz

5g

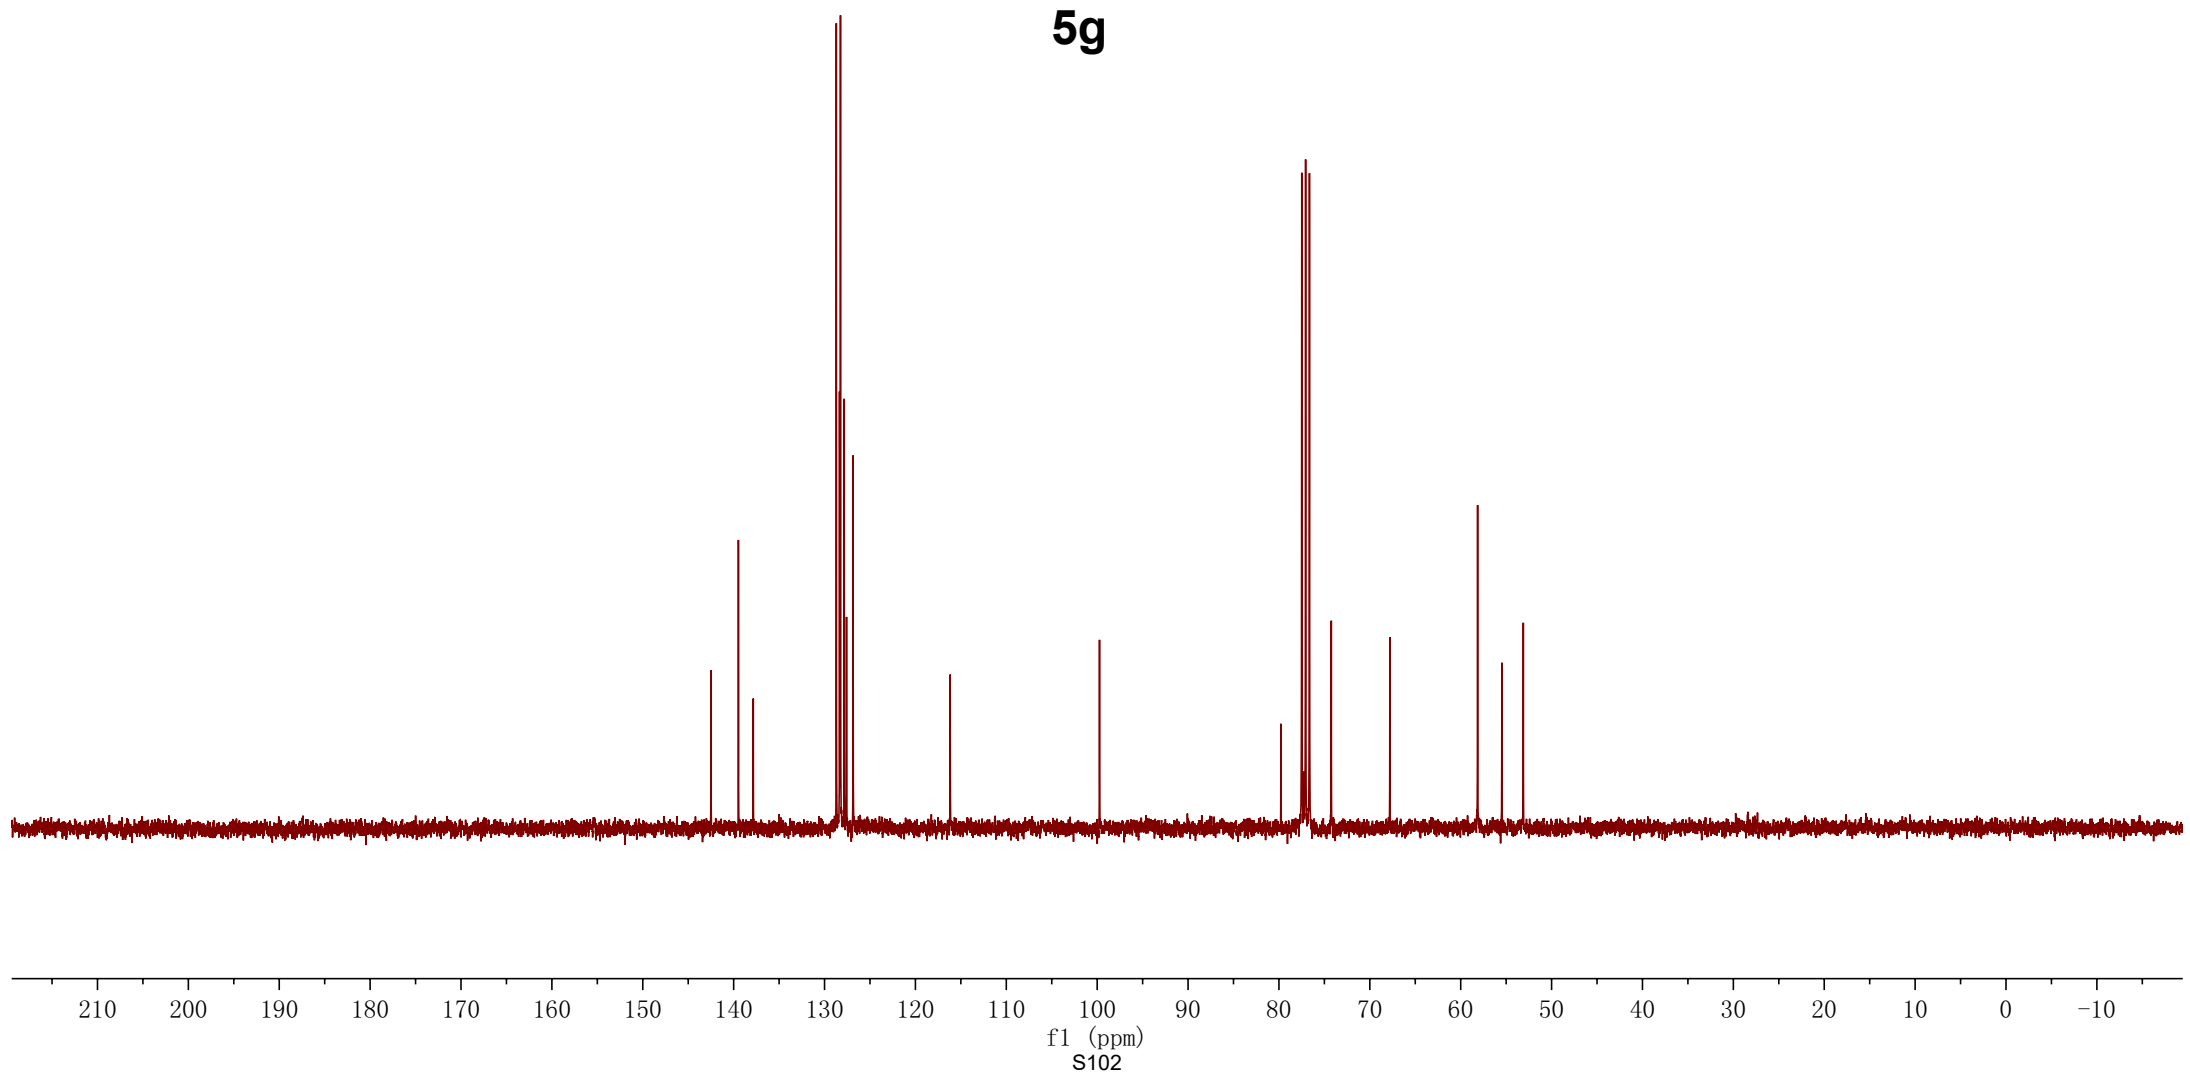



7.37  
7.35  
7.35  
7.34  
7.33  
7.32  
7.30  
7.30  
7.29  
7.28  
7.28  
7.27  
7.27  
7.26

5.45

5.28

5.00

4.62

4.59

4.54

4.51

3.68

3.67

3.66

3.32

2.96

2.40

1.25

0.00

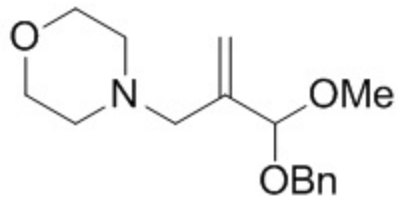

CDCl<sub>3</sub>, 400 MHz

5h

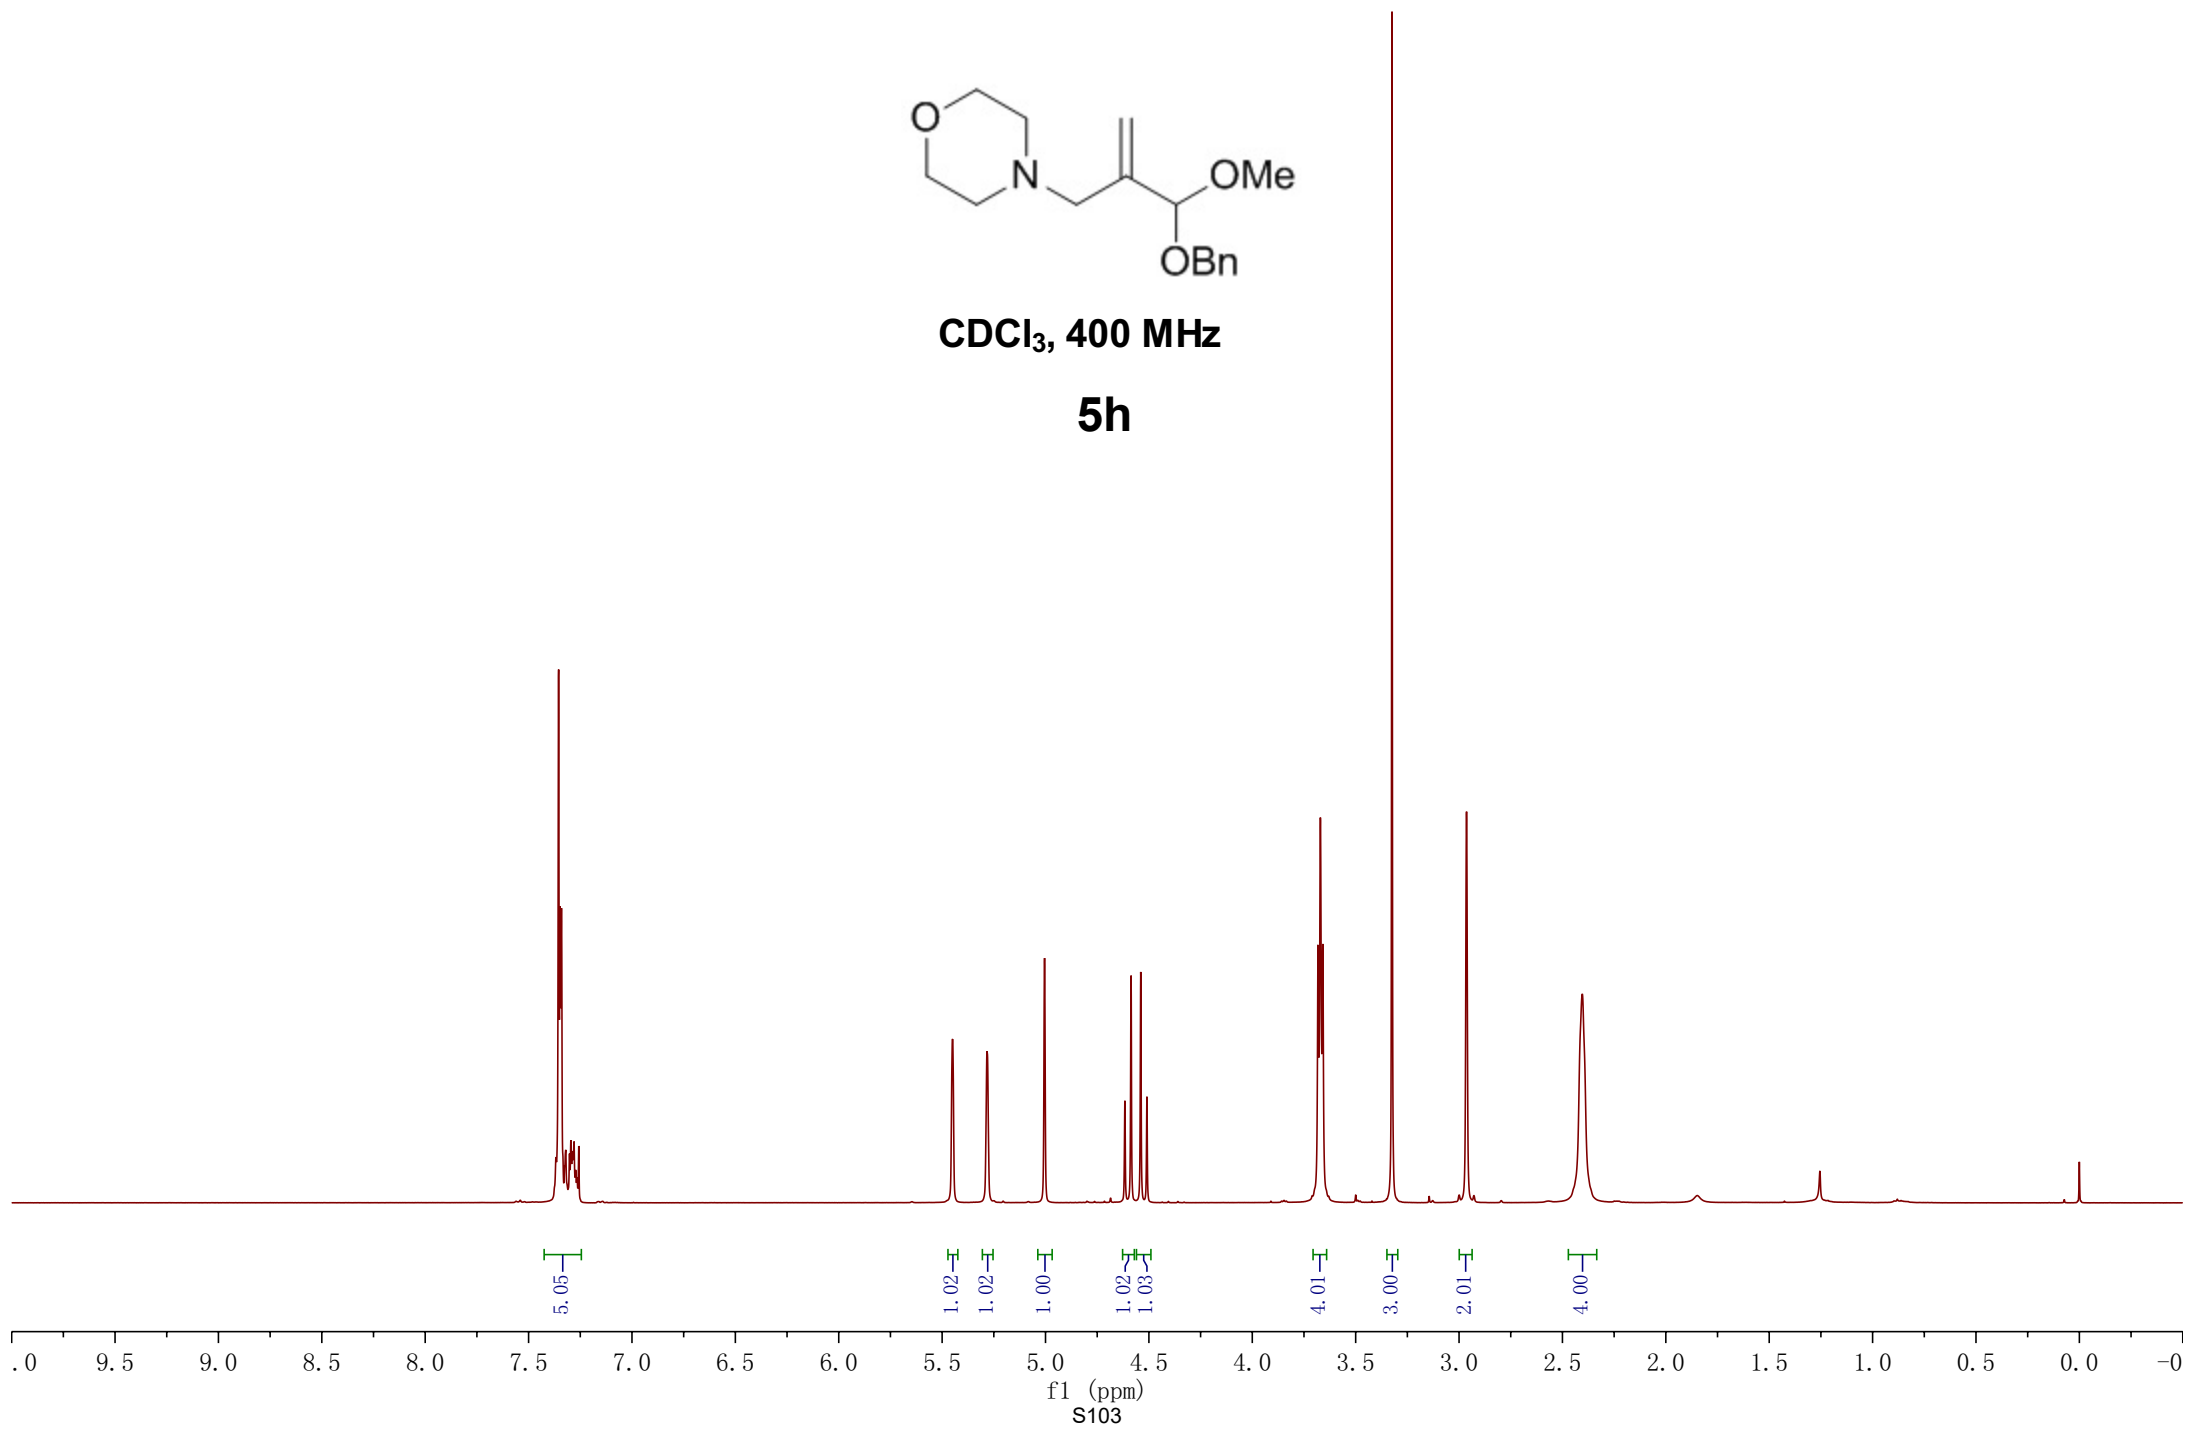

— 141.35  
— 138.25

— 128.46  
— 127.78  
— 127.65

— 116.23

— 101.28

— 67.60  
— 67.18

— 60.46

— 53.84  
— 53.05

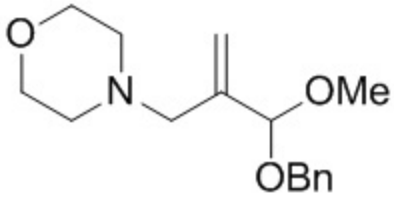

**CDCl<sub>3</sub>, 100 MHz**

5h

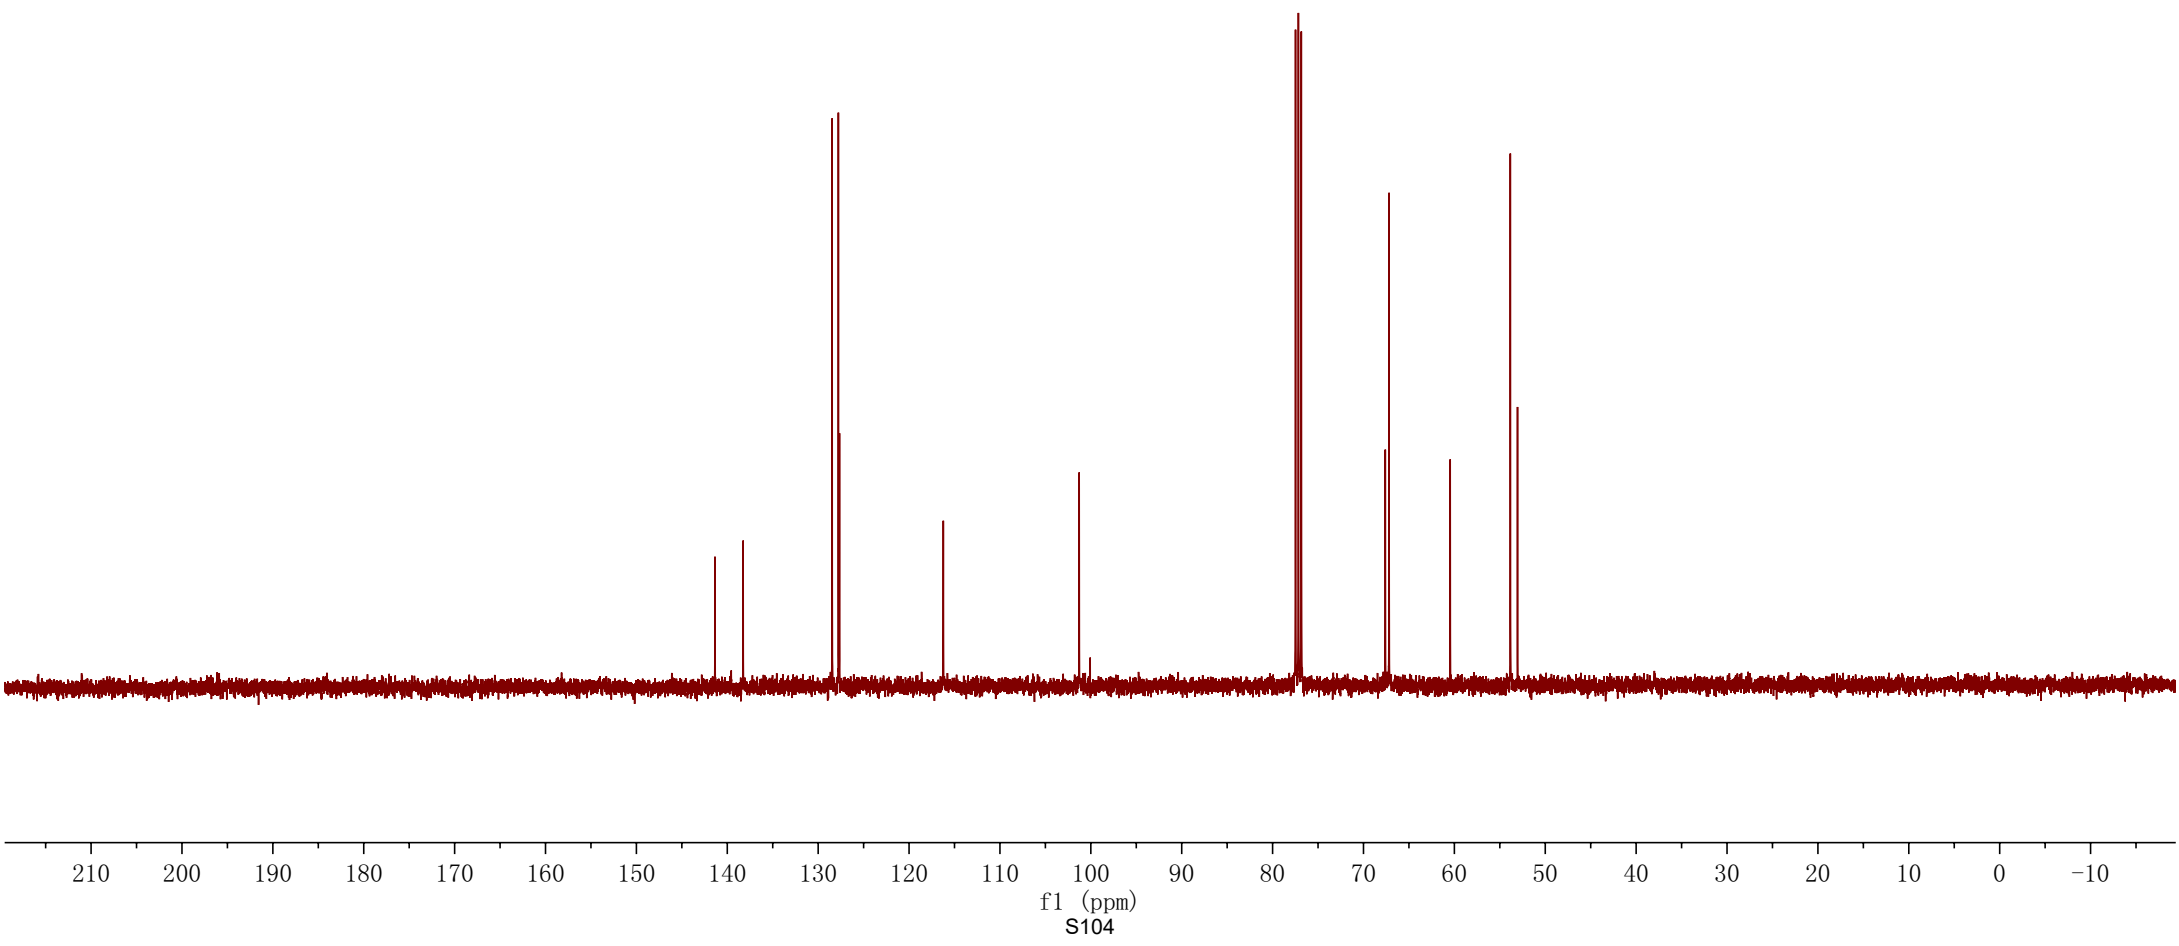

7.45  
7.44  
7.40  
7.39  
7.38  
7.37  
7.35  
7.29  
7.27  
7.25  
7.17  
7.15  
7.15  
7.13  
7.06  
7.04  
7.02  
6.74  
6.72

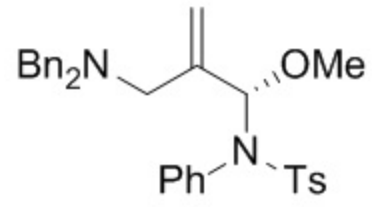

CDCl<sub>3</sub>, 400 MHz

3a'

3.75  
3.72  
3.39  
3.26  
3.23  
3.10  
3.06  
2.68  
2.64  
2.38  
1.55  
1.26  
0.00

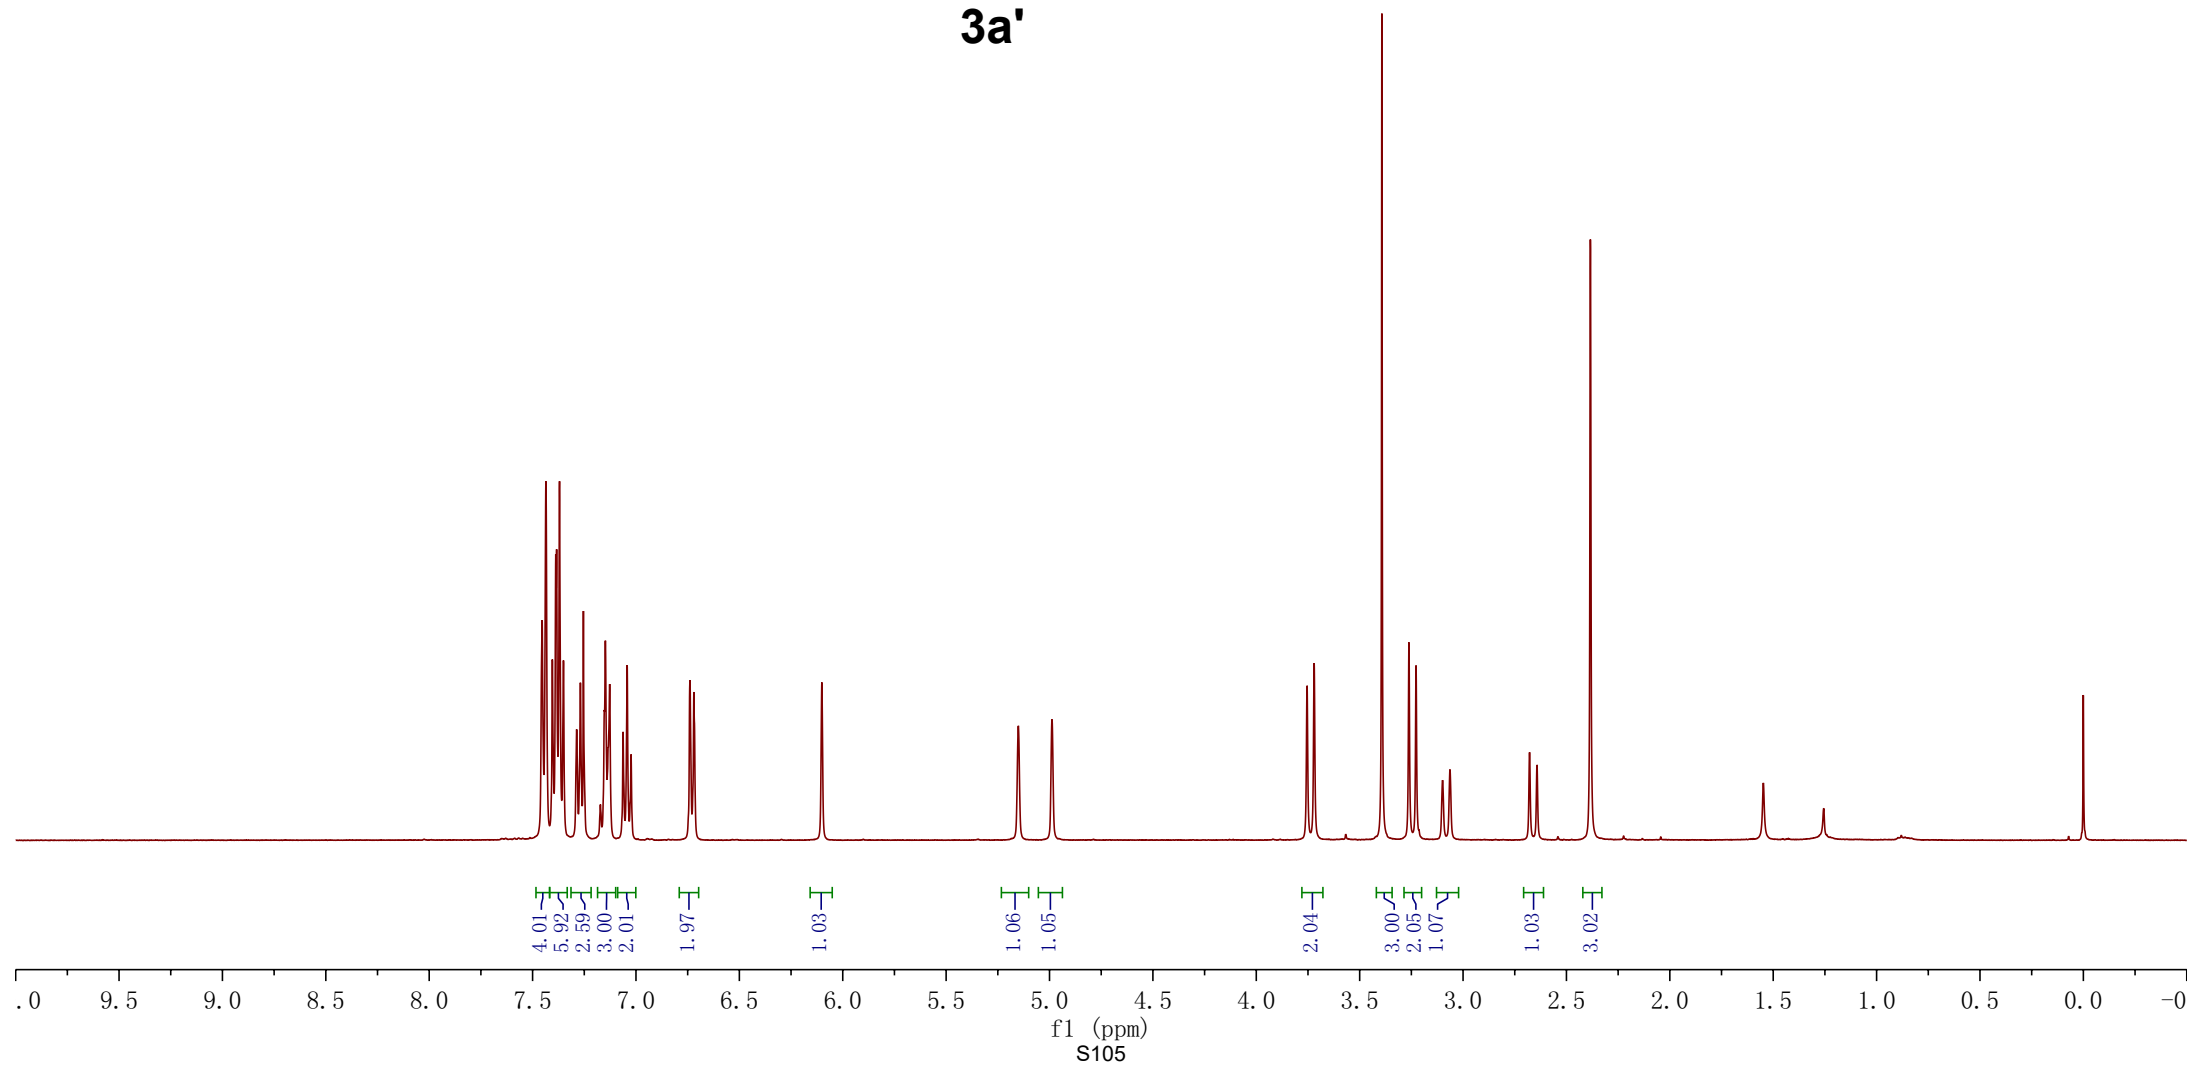

143.09  
140.61  
139.25  
136.99  
135.62  
131.33  
128.79  
128.70  
128.46  
128.20  
127.99  
127.96  
126.92  
117.18

89.36

58.37  
56.71  
56.34

21.55

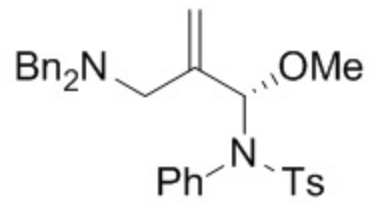

CDCl<sub>3</sub>, 75 MHz

3a'

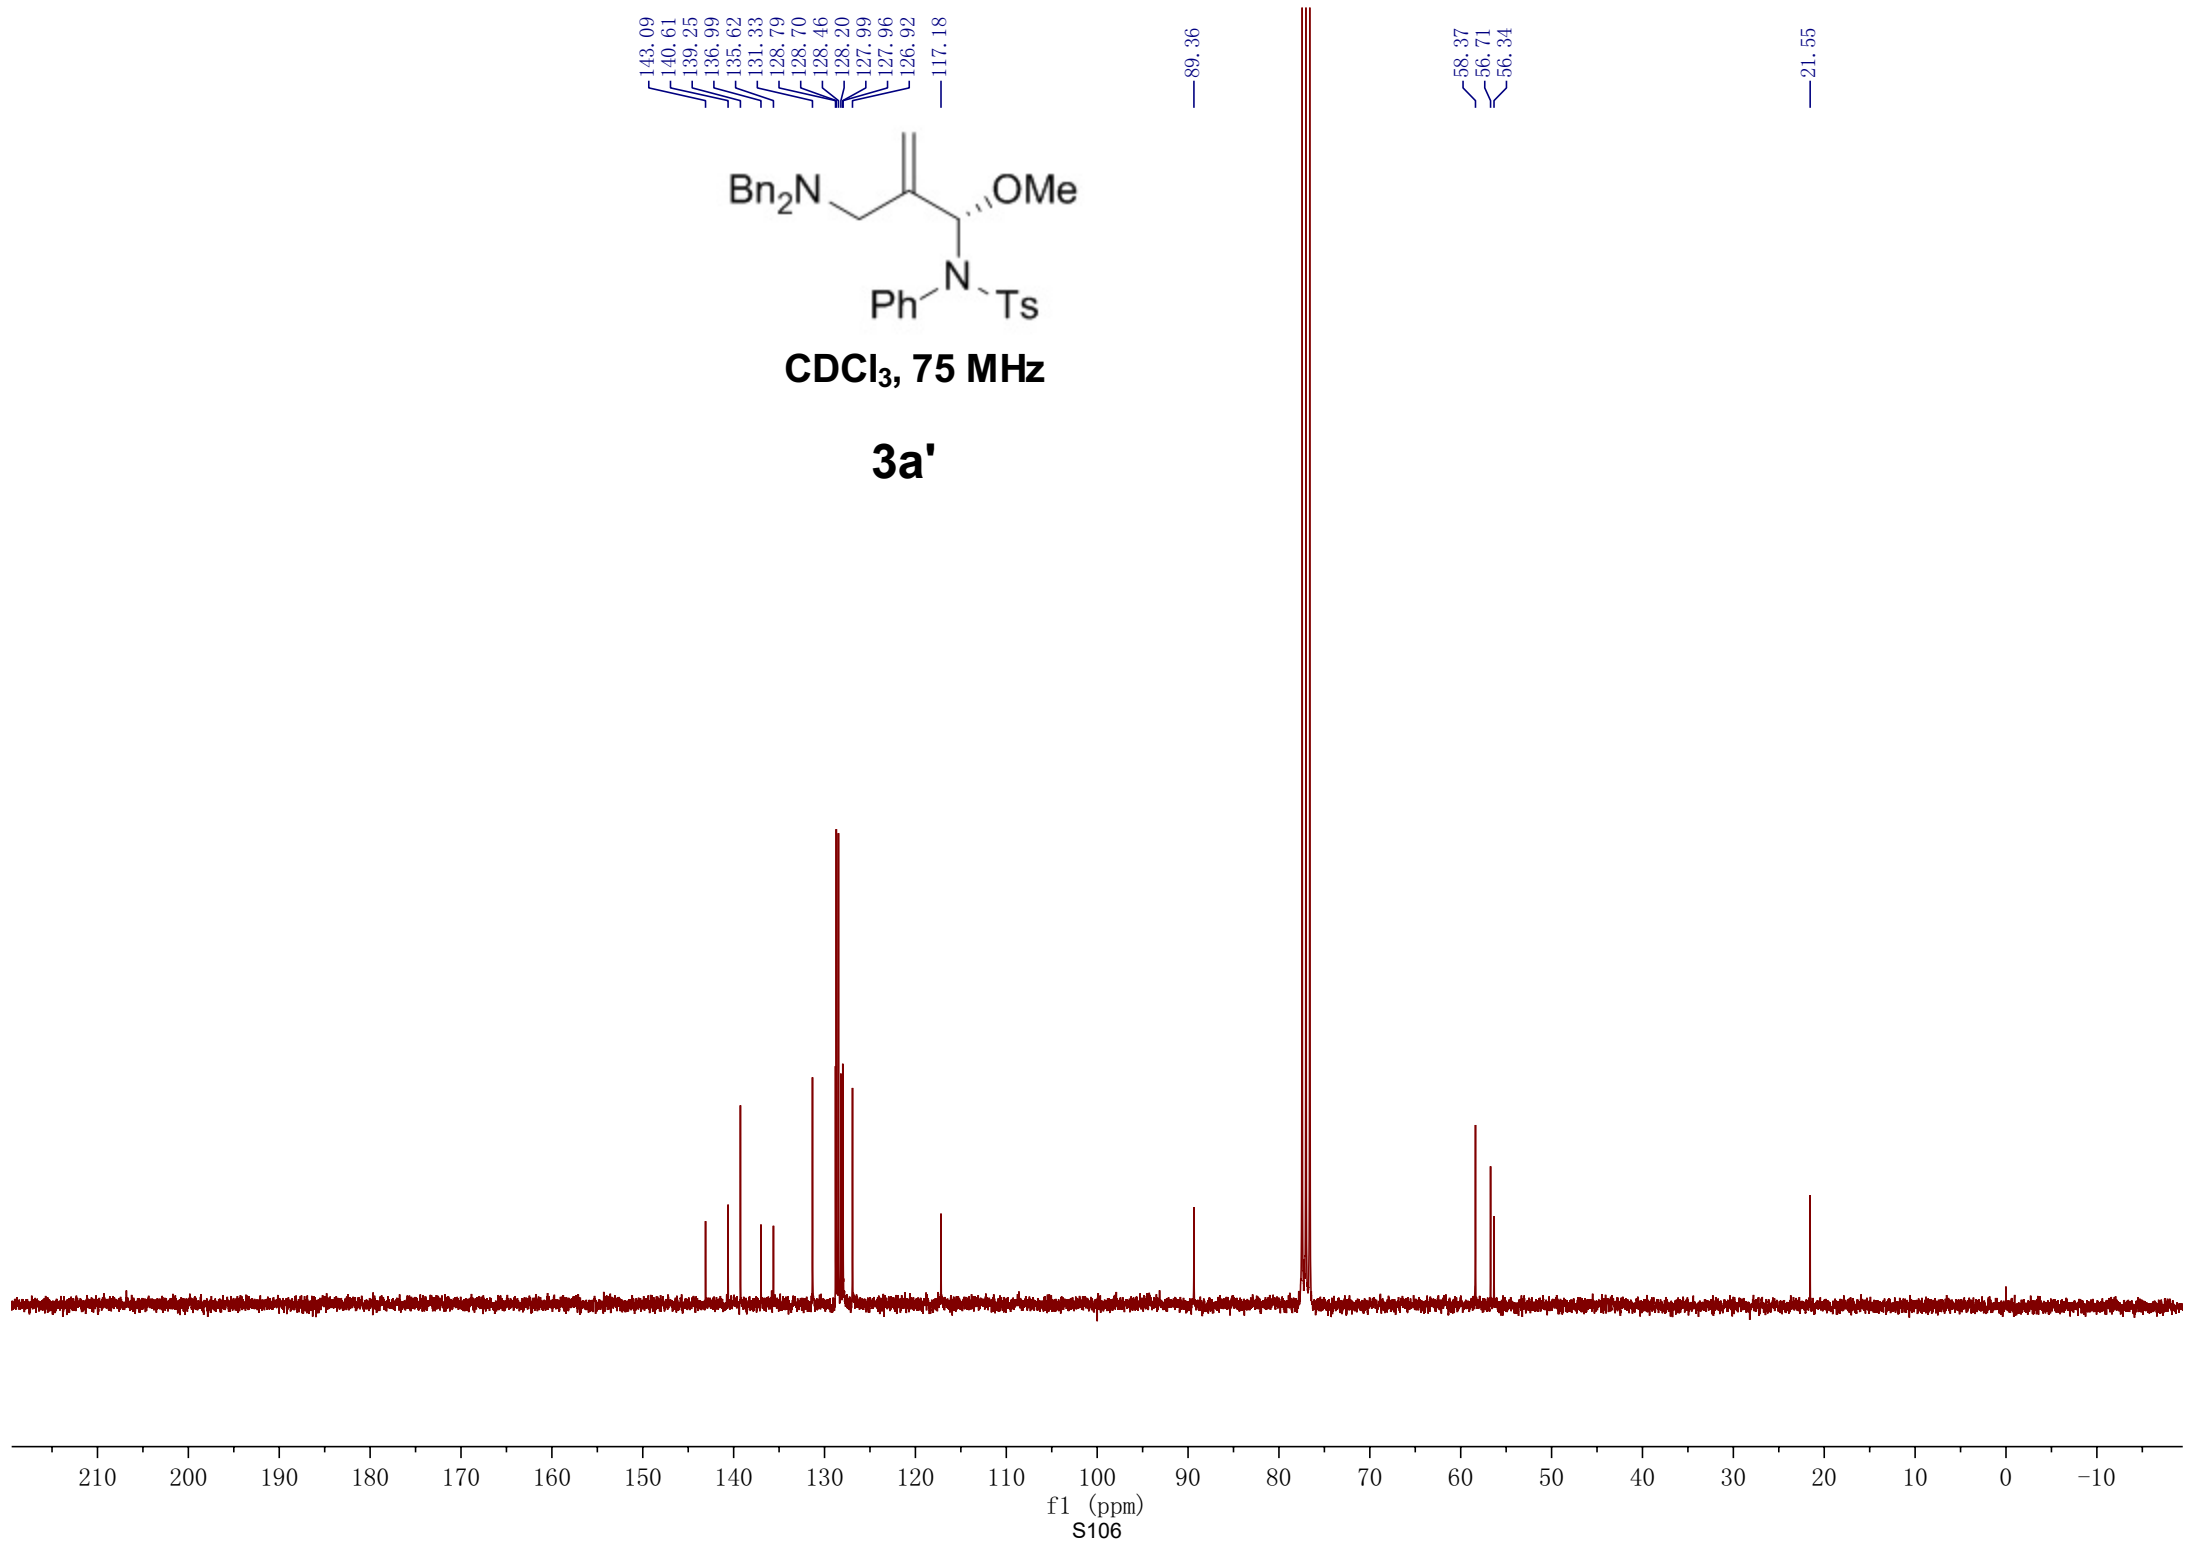

7.46  
7.44  
7.40  
7.38  
7.36  
7.29  
7.28  
7.26  
7.23  
7.16  
7.15  
7.14  
7.13  
6.56  
6.54

6.09

5.17

5.00

3.77

3.74

3.37

3.25

3.21

3.04

3.00

2.63

2.60

2.38

-0.00

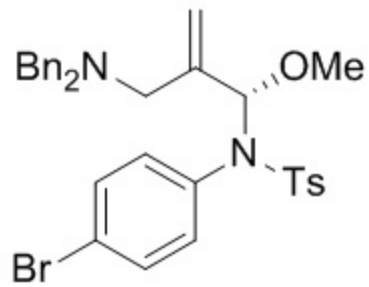

CDCl<sub>3</sub>, 400 MHz

3b'

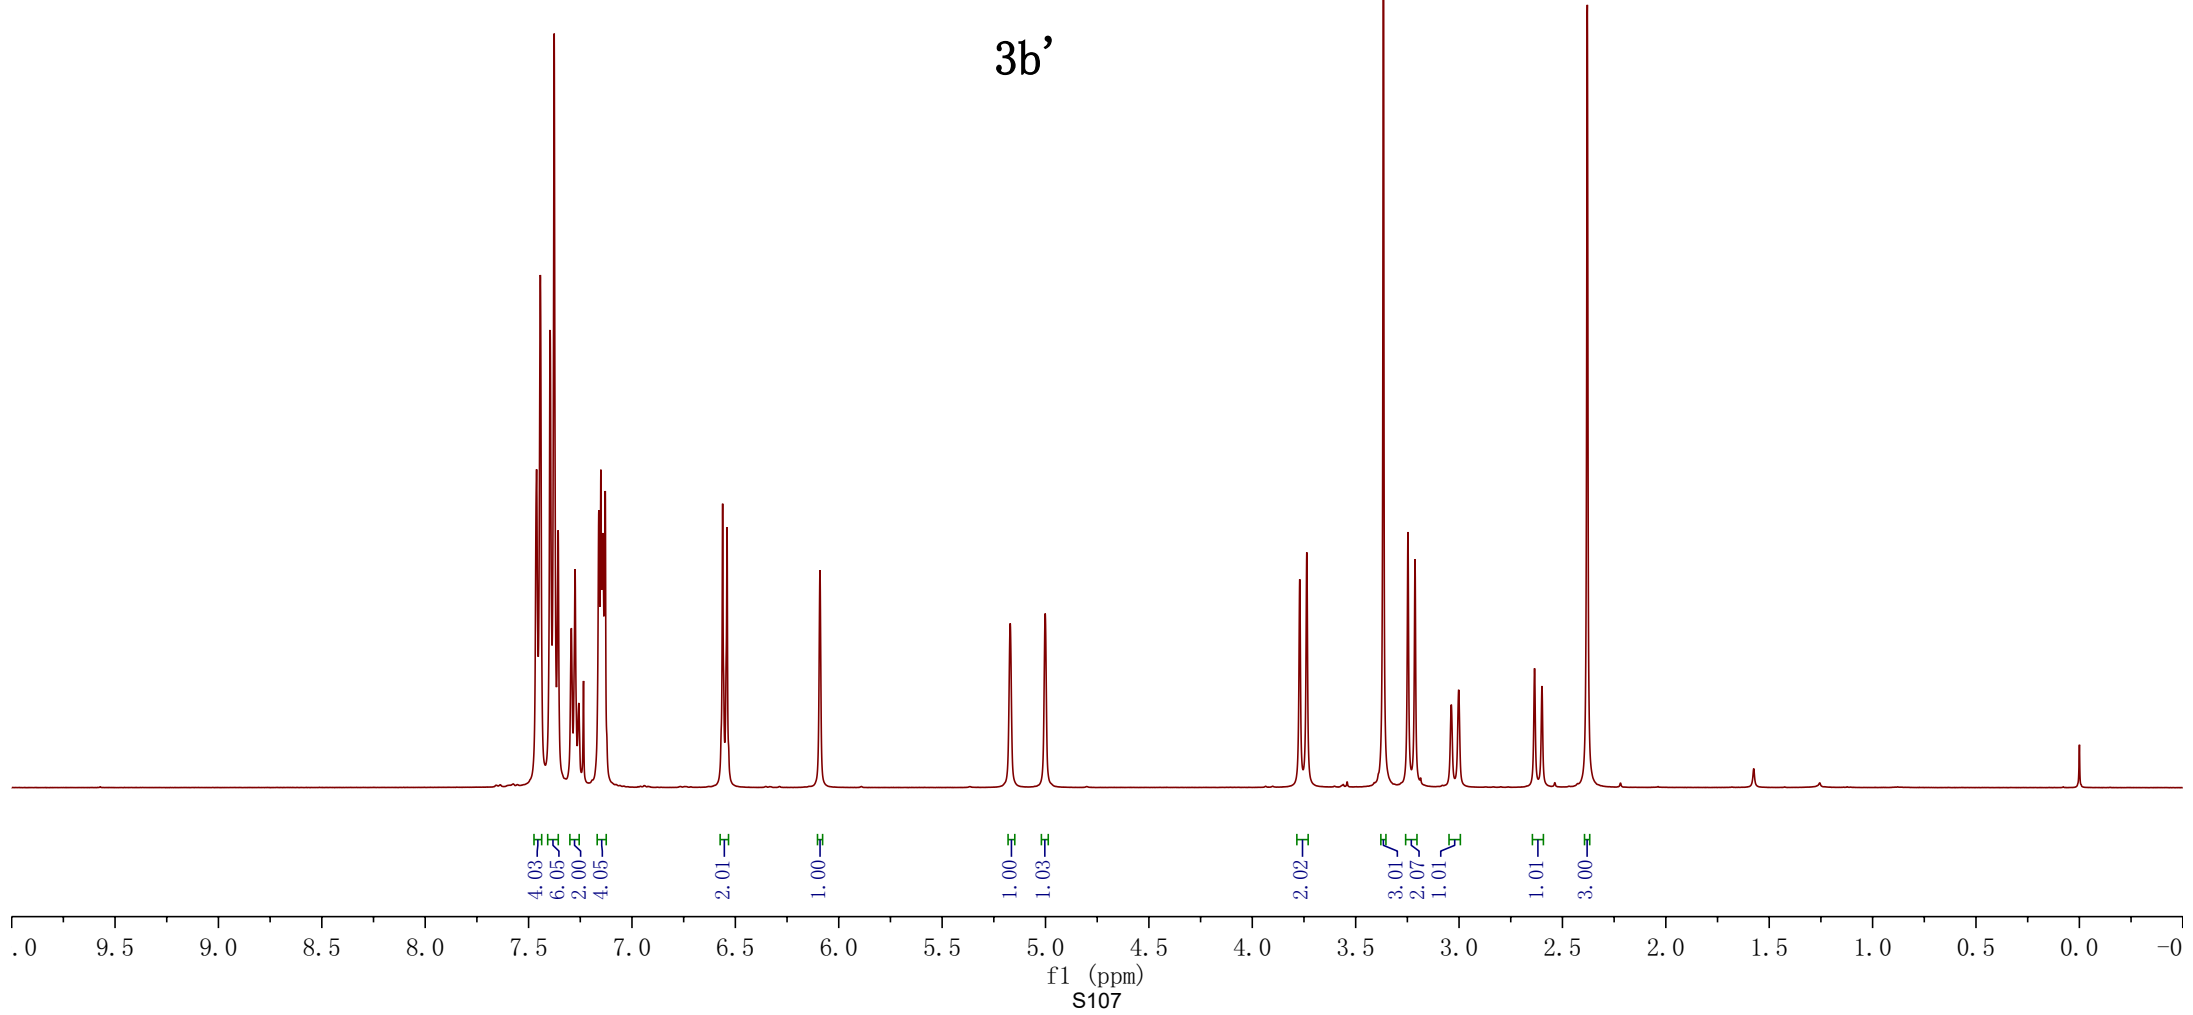

143.41  
140.30  
139.20  
136.63  
134.86  
132.76  
131.26  
128.95  
128.75  
128.56  
128.19  
127.97  
117.65

89.33

58.50  
56.89  
56.33

21.61

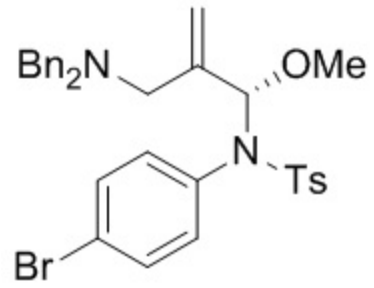

CDCl<sub>3</sub>, 75 MHz

3b'

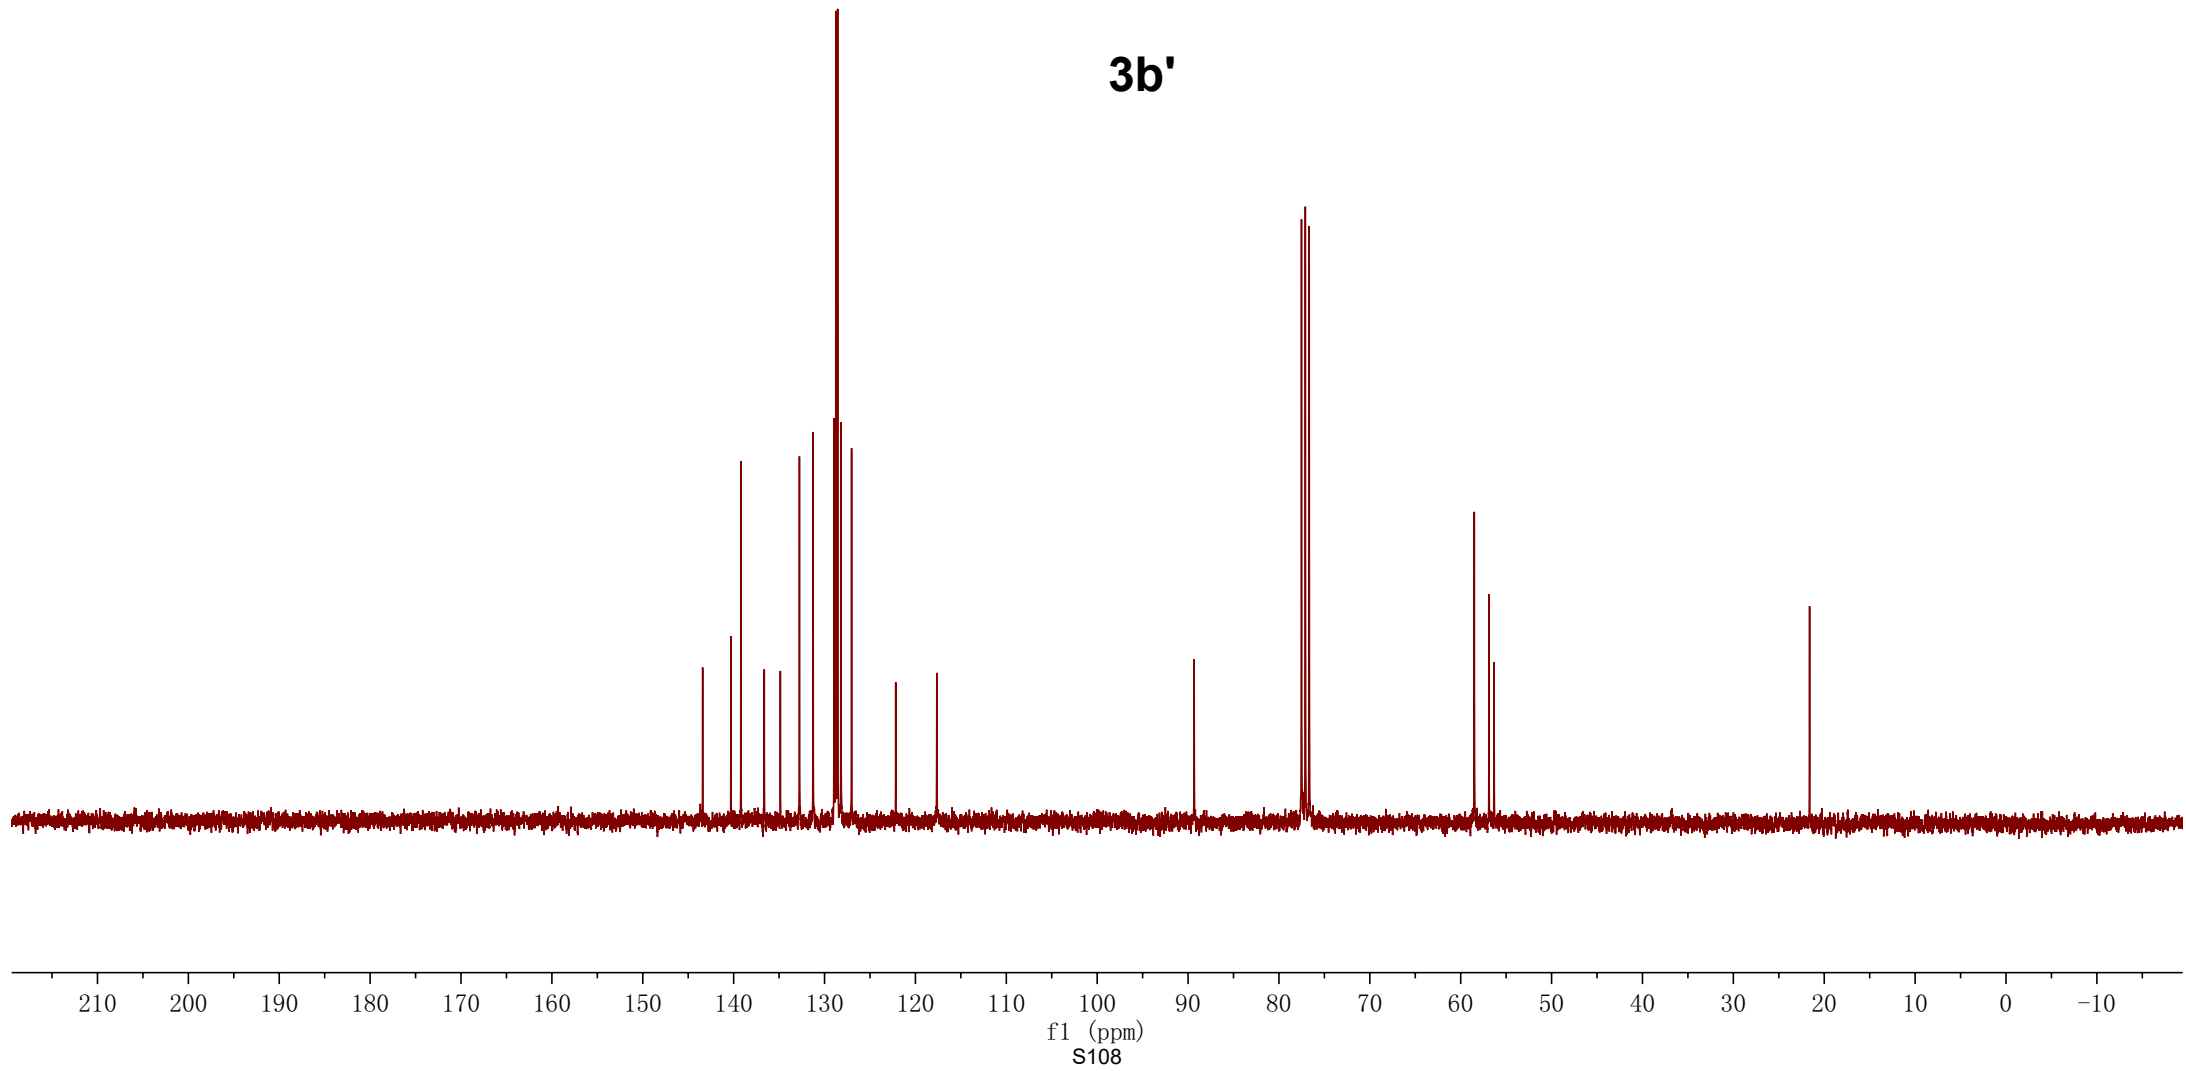

7.46  
7.44  
7.41  
7.39  
7.38  
7.36  
7.35  
7.28  
7.26  
7.24  
7.22  
7.14  
7.12  
6.62  
6.60  
6.55  
6.53

6.07  
5.16  
4.98

3.76  
3.73  
3.70  
3.38  
3.28  
3.25  
3.10  
3.07

2.69  
2.66  
2.37

0.00

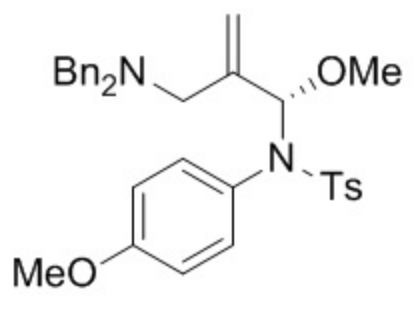

CDCl<sub>3</sub>, 400 MHz

3c'

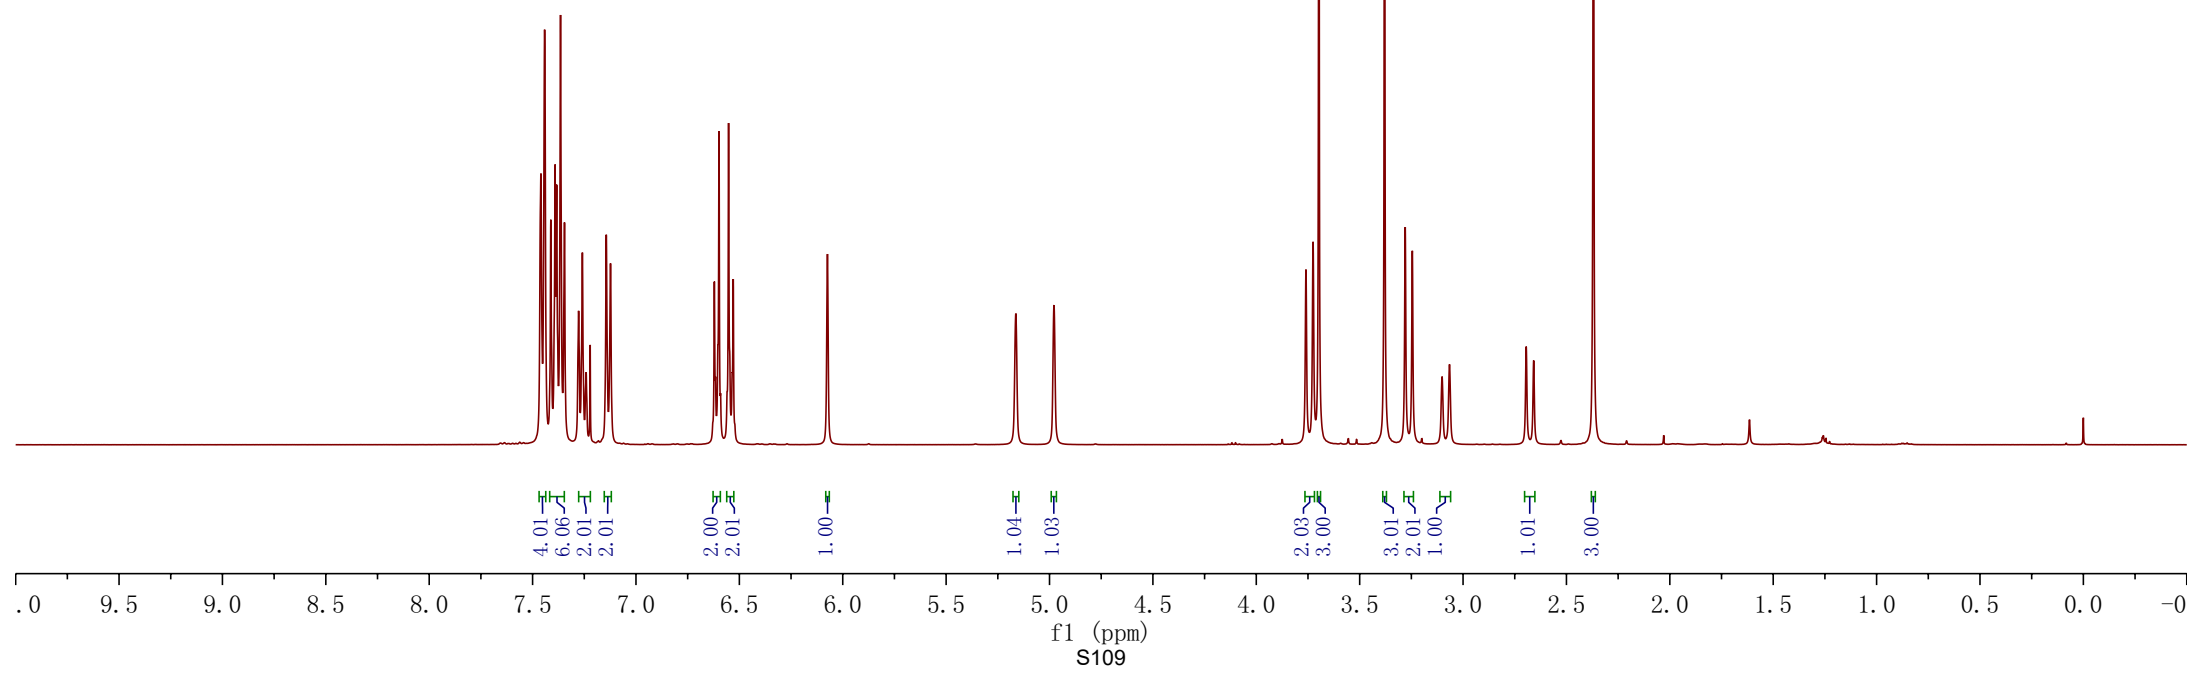

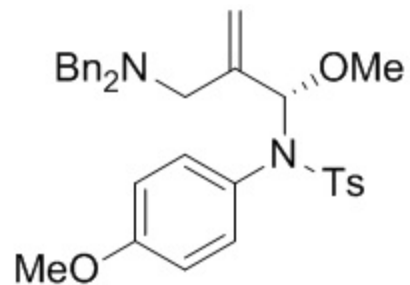

CDCl<sub>3</sub>, 75 MHz

3c'

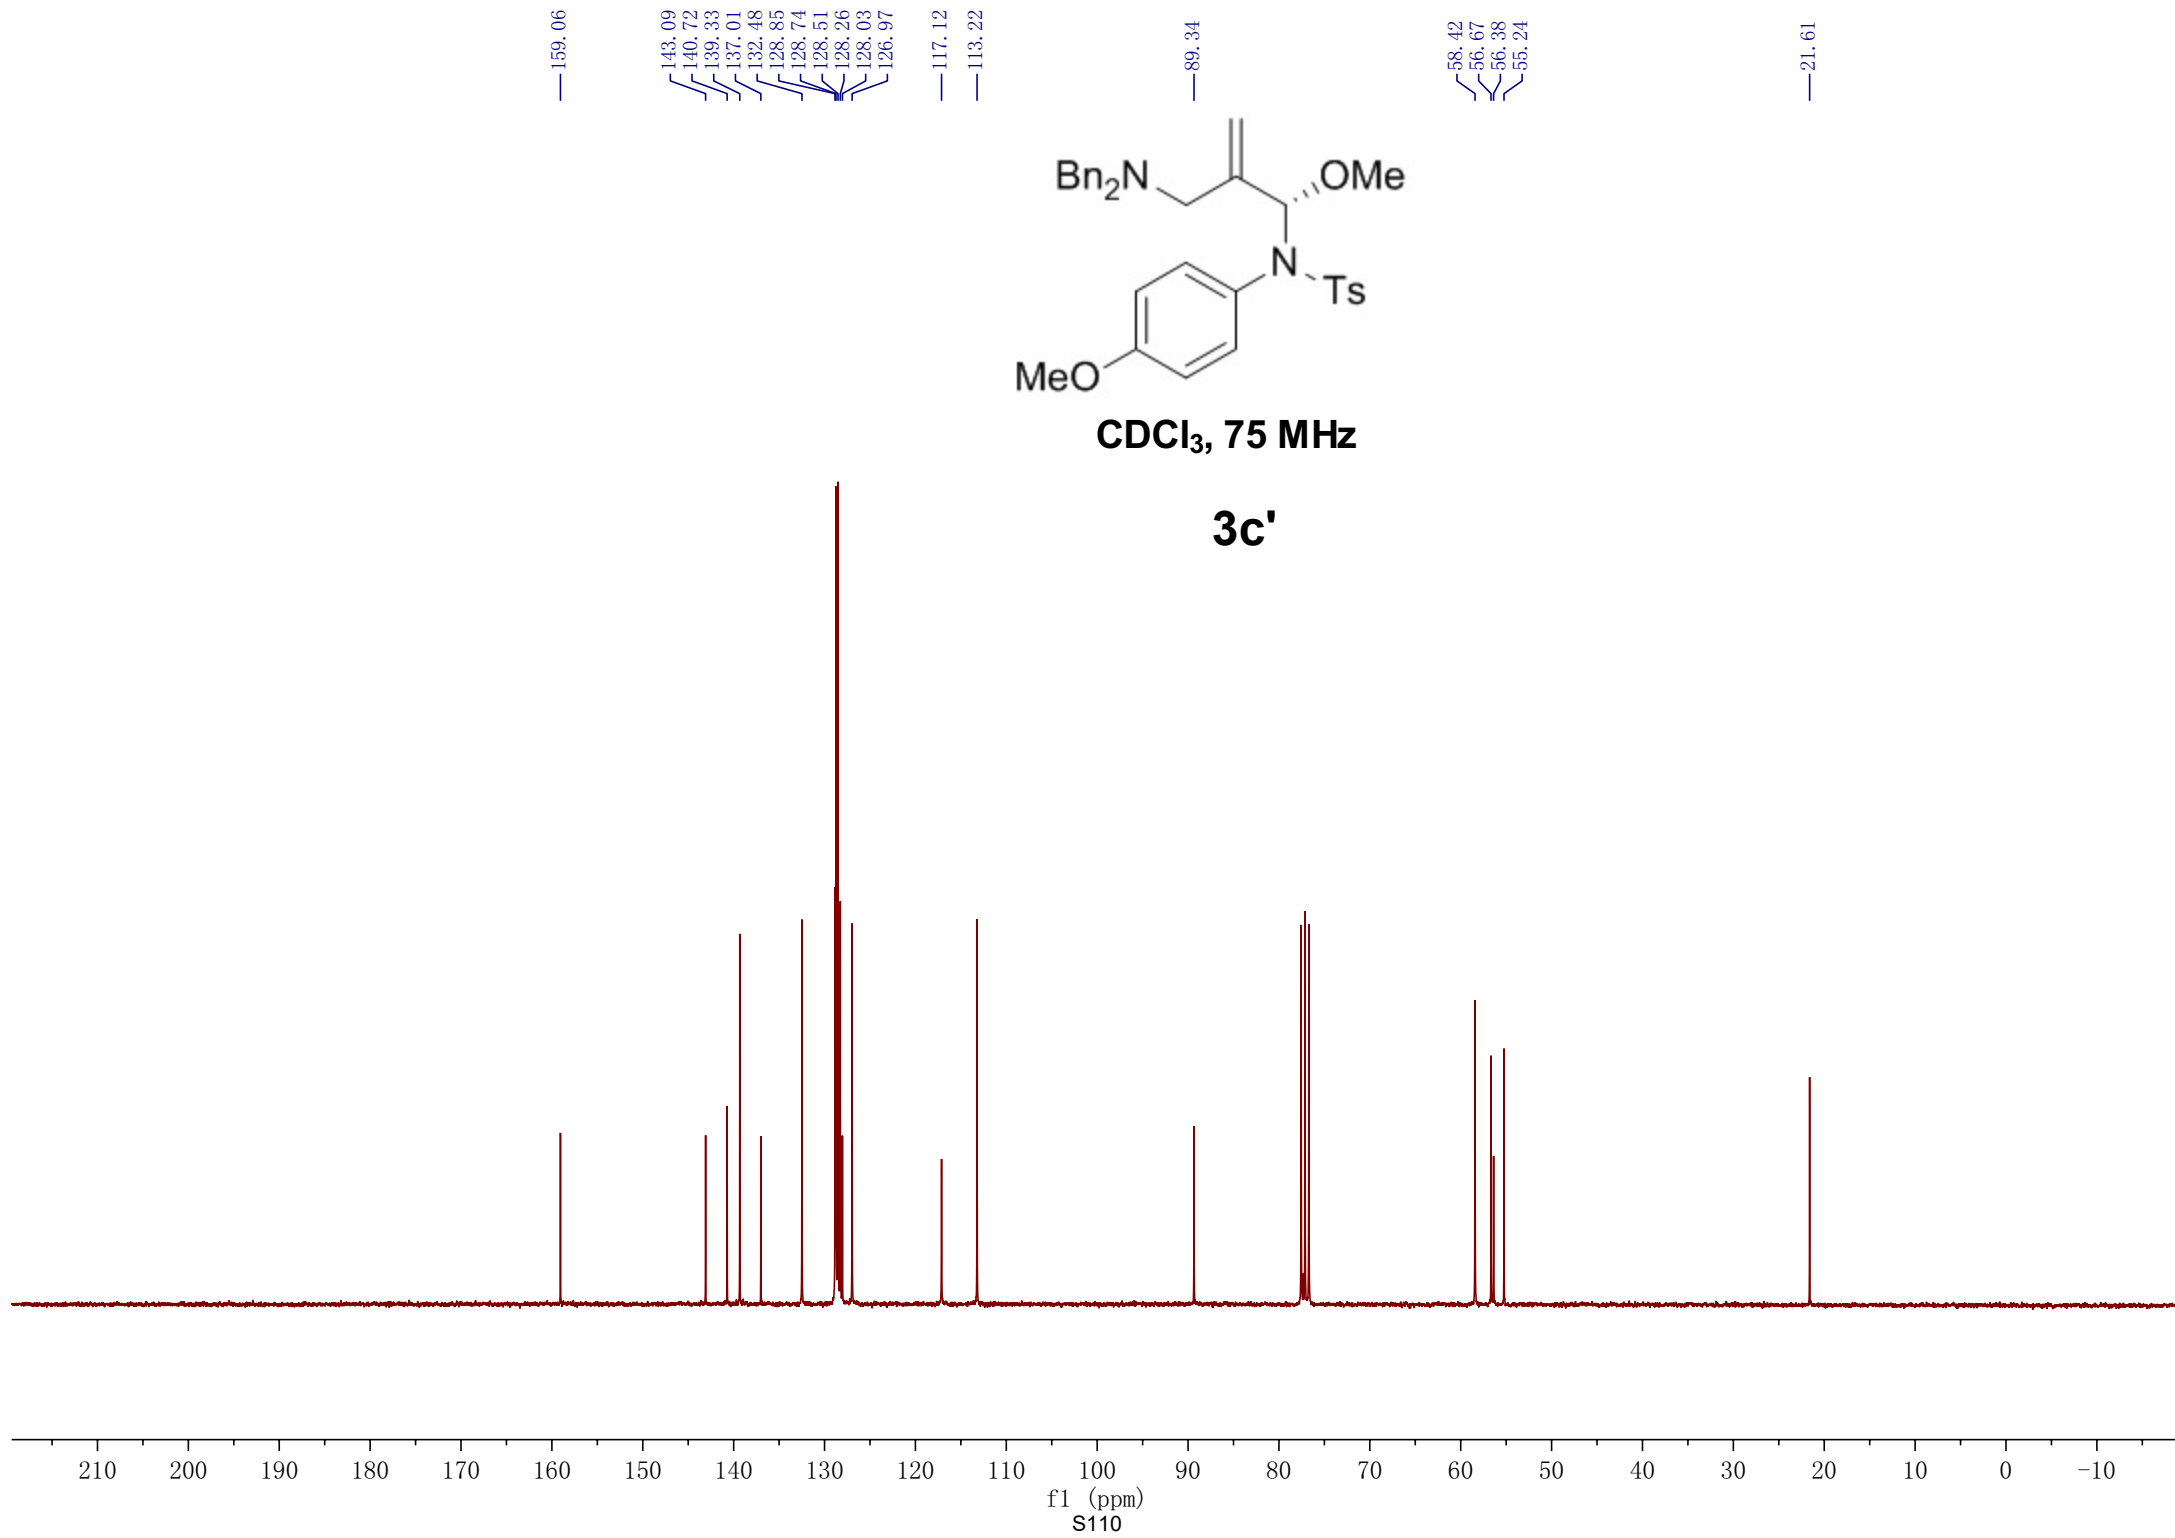



7.47  
7.45  
7.40  
7.39  
7.38  
7.37  
7.35  
7.30  
7.29  
7.28  
7.26  
7.25  
7.22  
7.16  
7.14  
6.84  
6.81

6.13

5.17  
5.03

3.78  
3.73  
3.56  
3.38  
3.25  
3.21  
3.04  
2.99

2.63  
2.58  
2.38

0.87  
0.85

-0.00

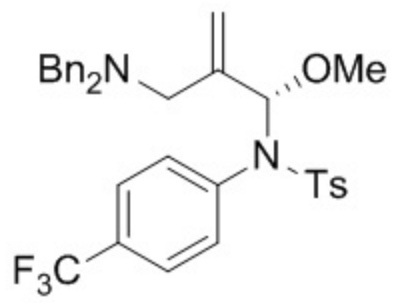

CDCl<sub>3</sub>, 300 MHz

3d'

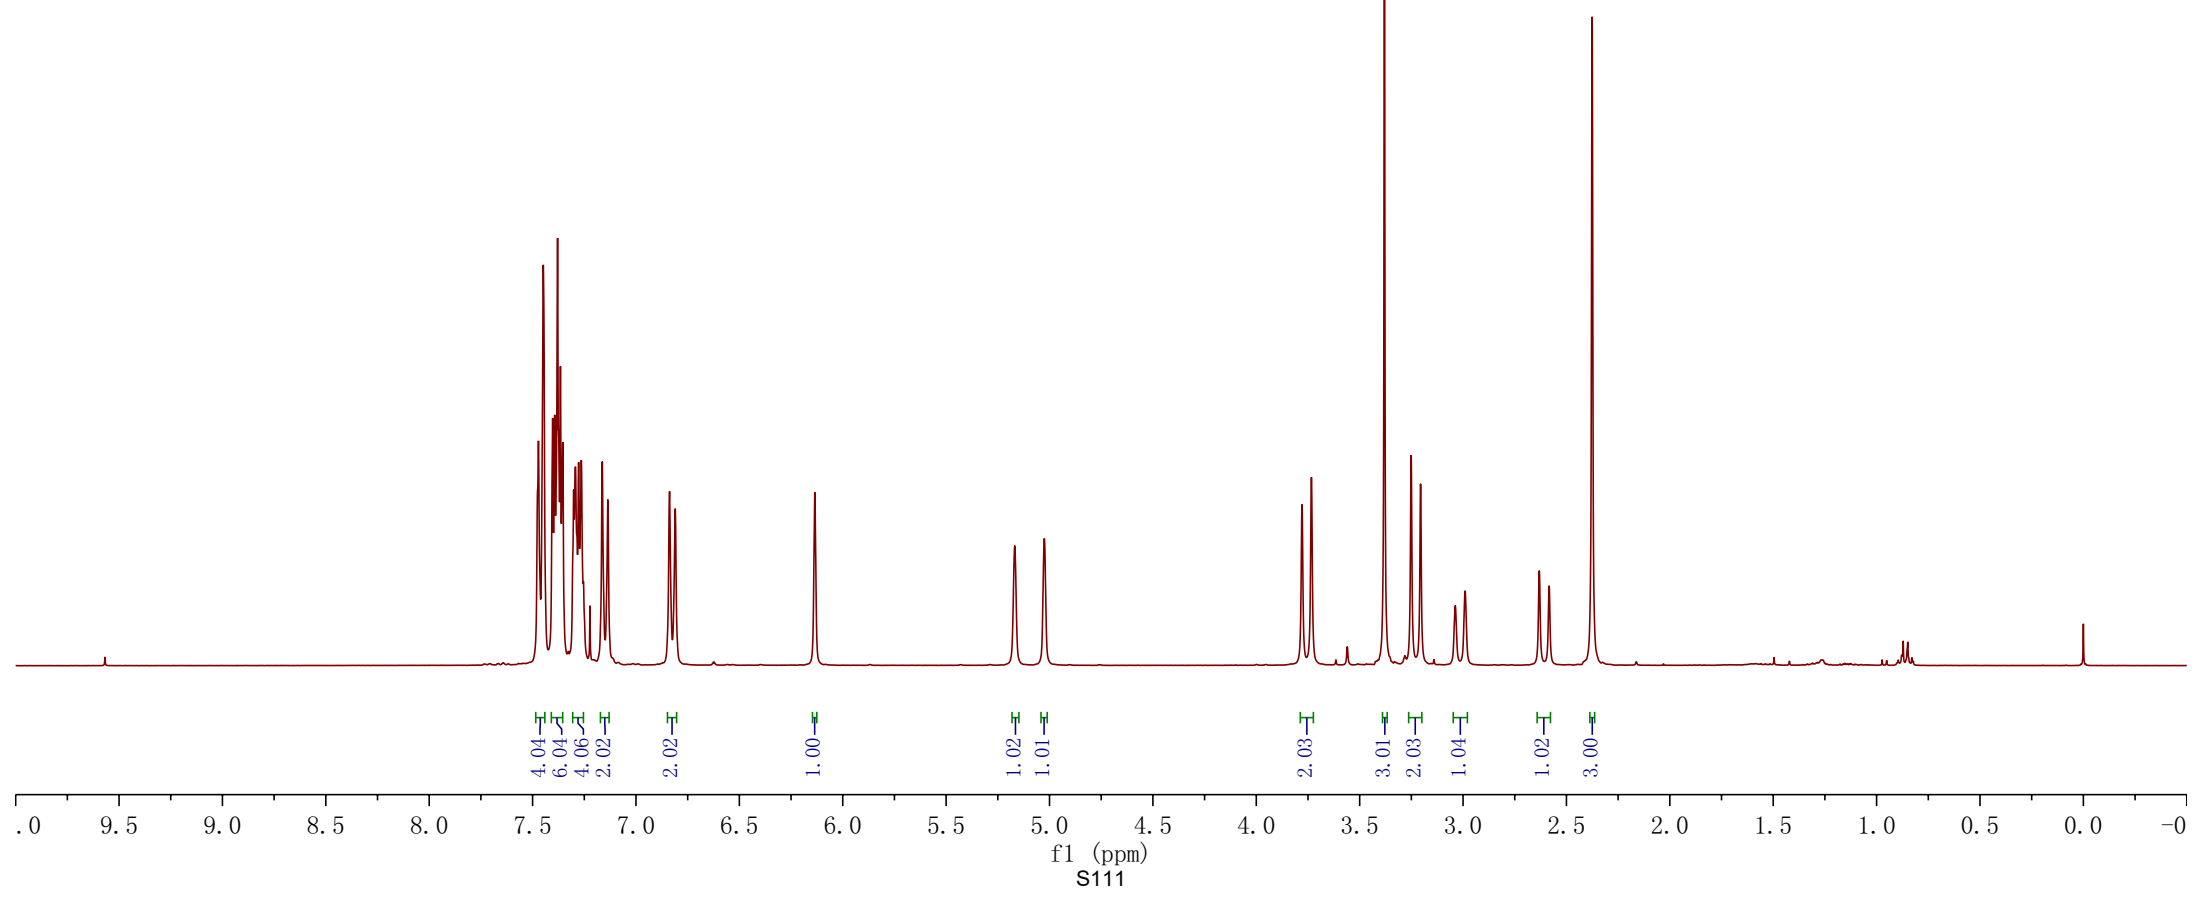

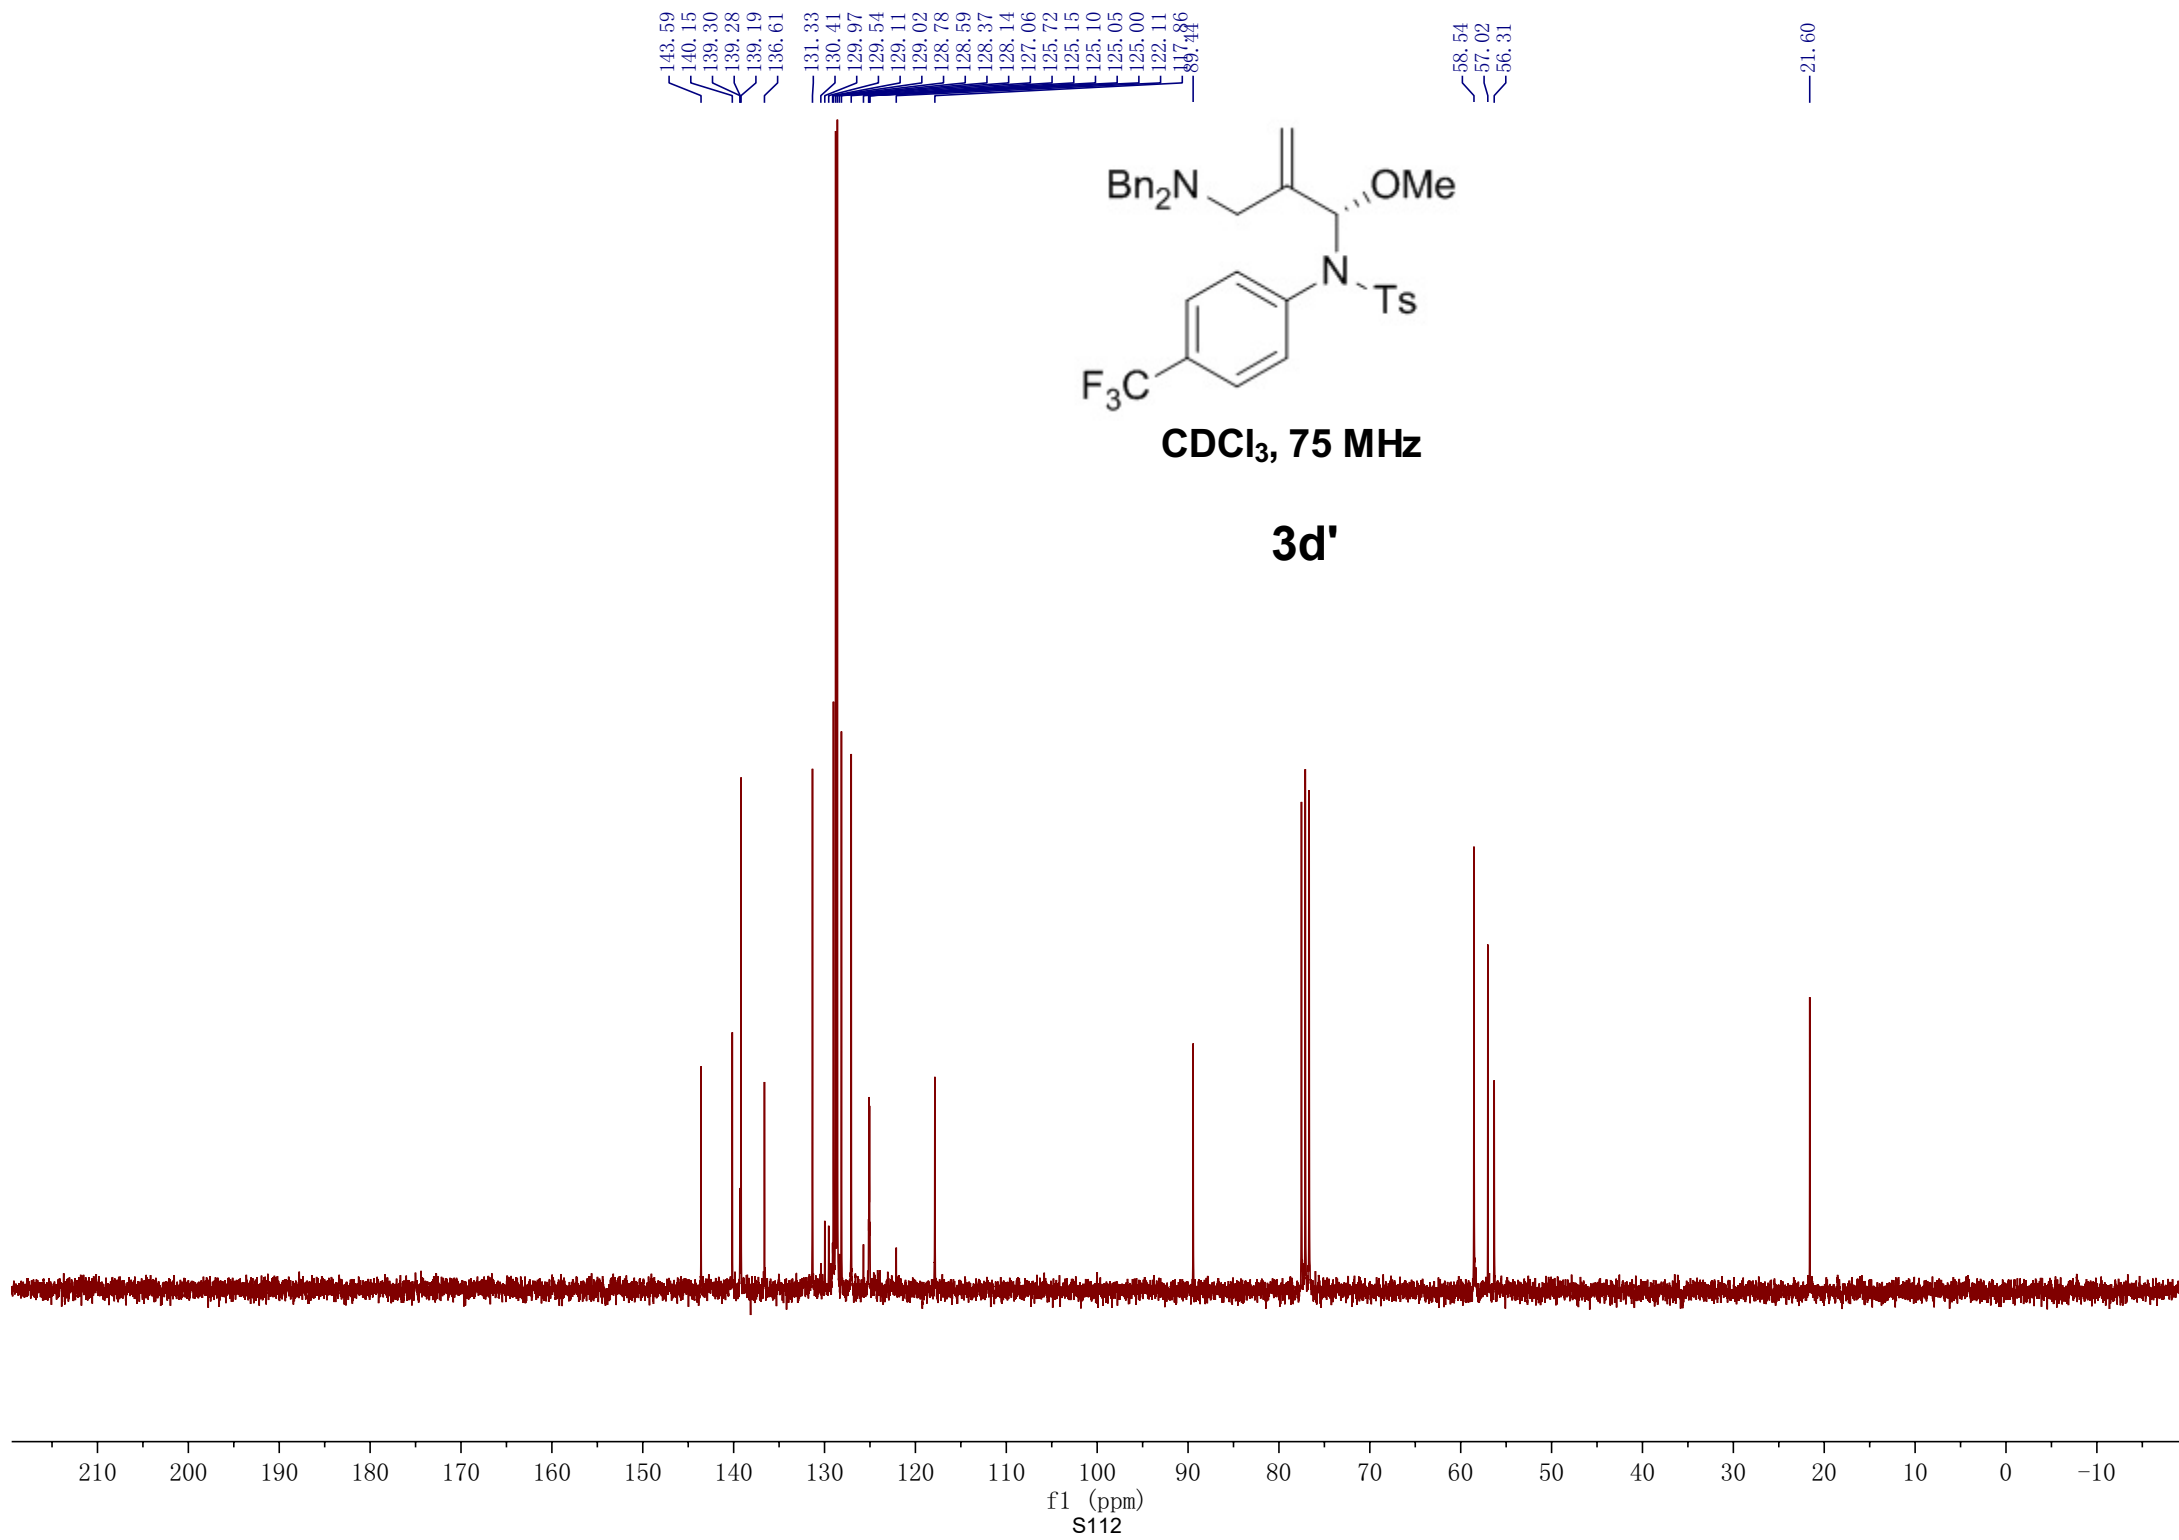

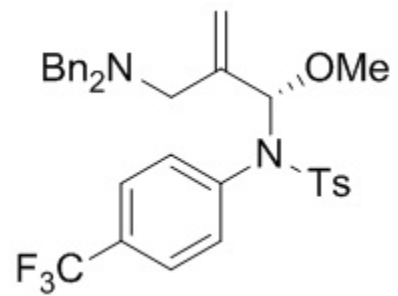

CDCl<sub>3</sub>, 282 MHz

3d'

62.52

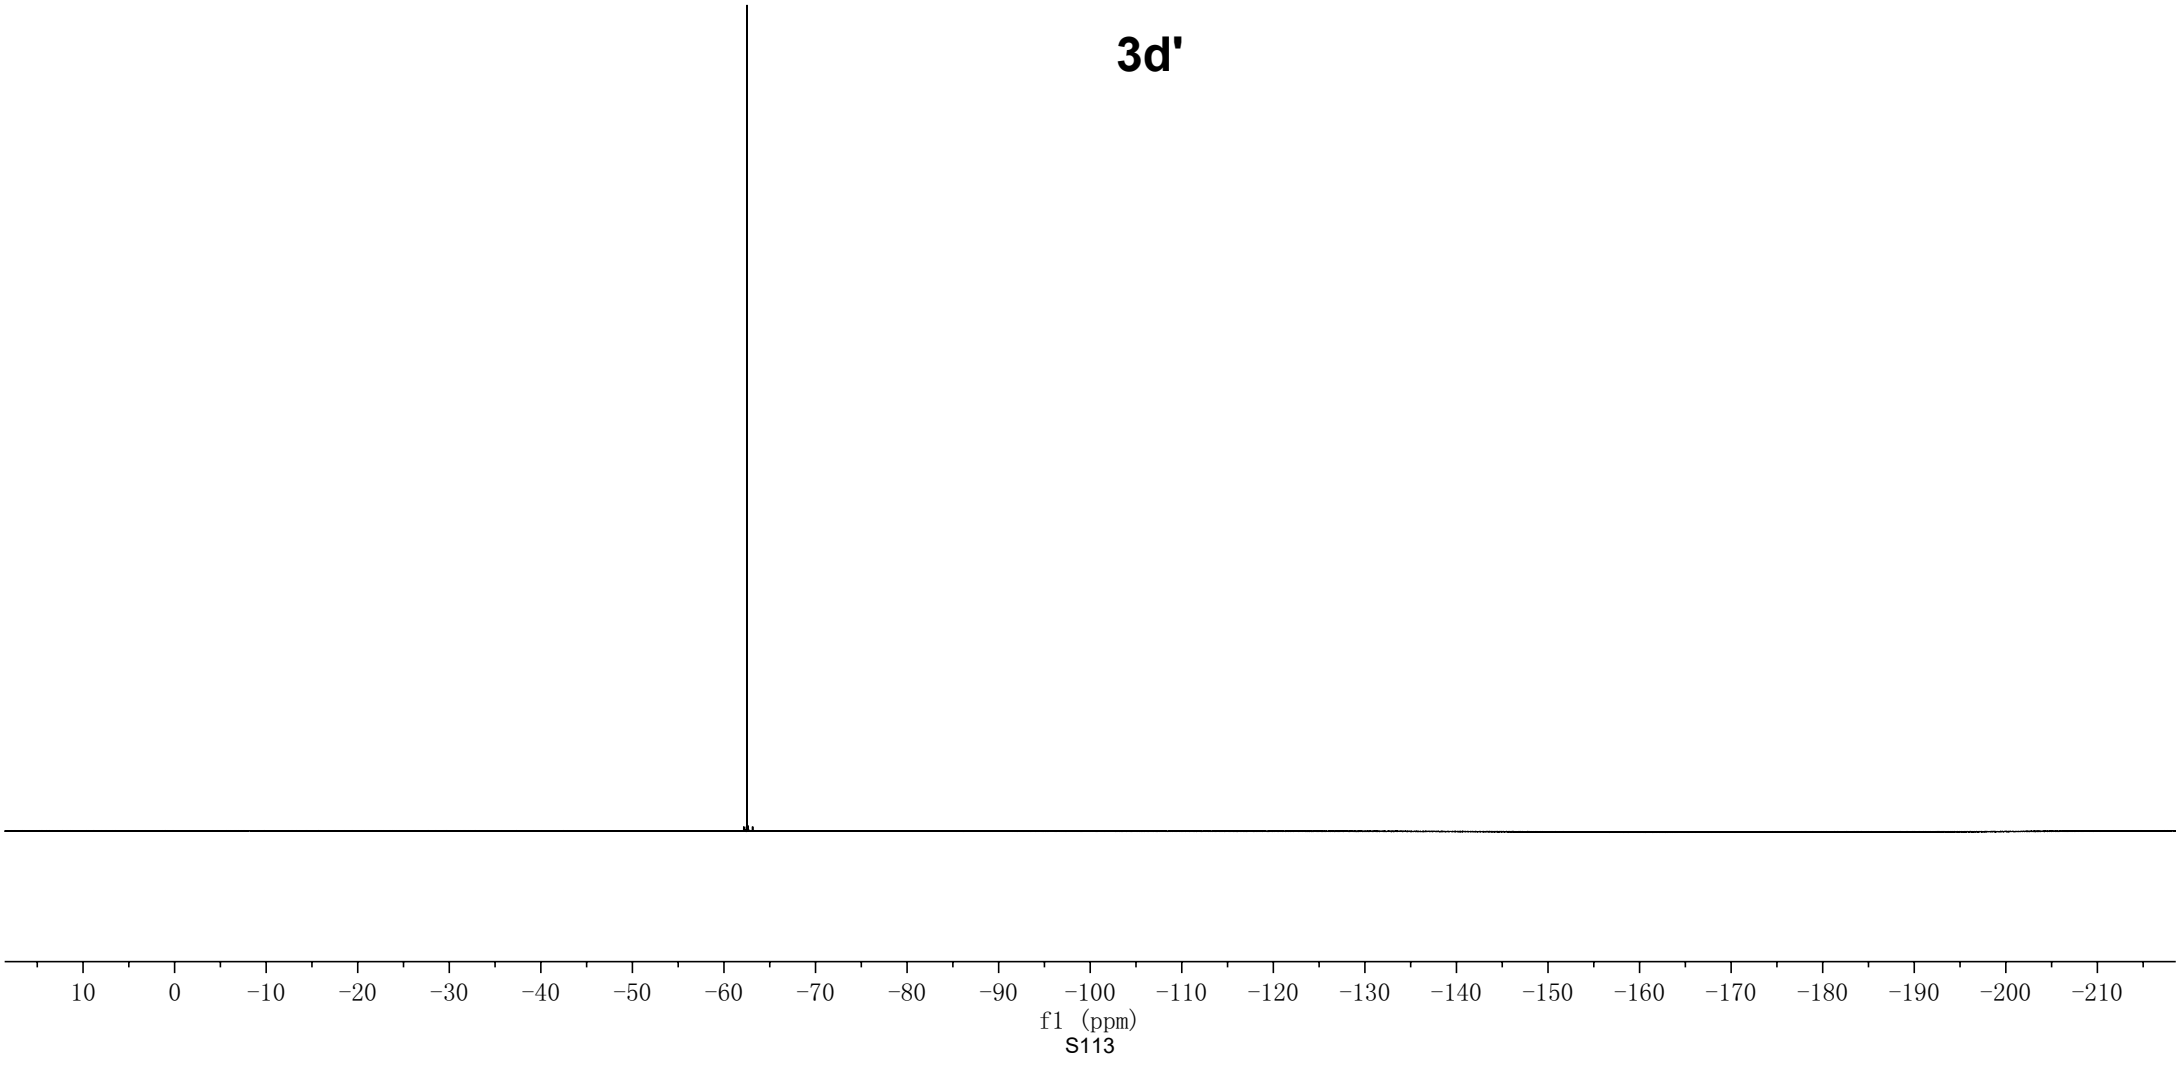

7.539  
7.536  
7.519  
7.516  
7.480  
7.467  
7.459  
7.448  
7.429  
7.365  
7.361  
7.358  
7.343  
7.301  
7.233  
7.212  
6.946  
6.926  
6.818  
6.813  
6.574  
6.569  
6.554  
6.146

5.231  
5.084  
5.079

3.859  
3.825

3.424  
3.144  
3.108

2.706  
2.670  
2.449  
2.315

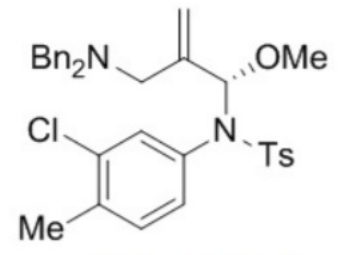

CDCl<sub>3</sub>, 300 MHz  
3e'

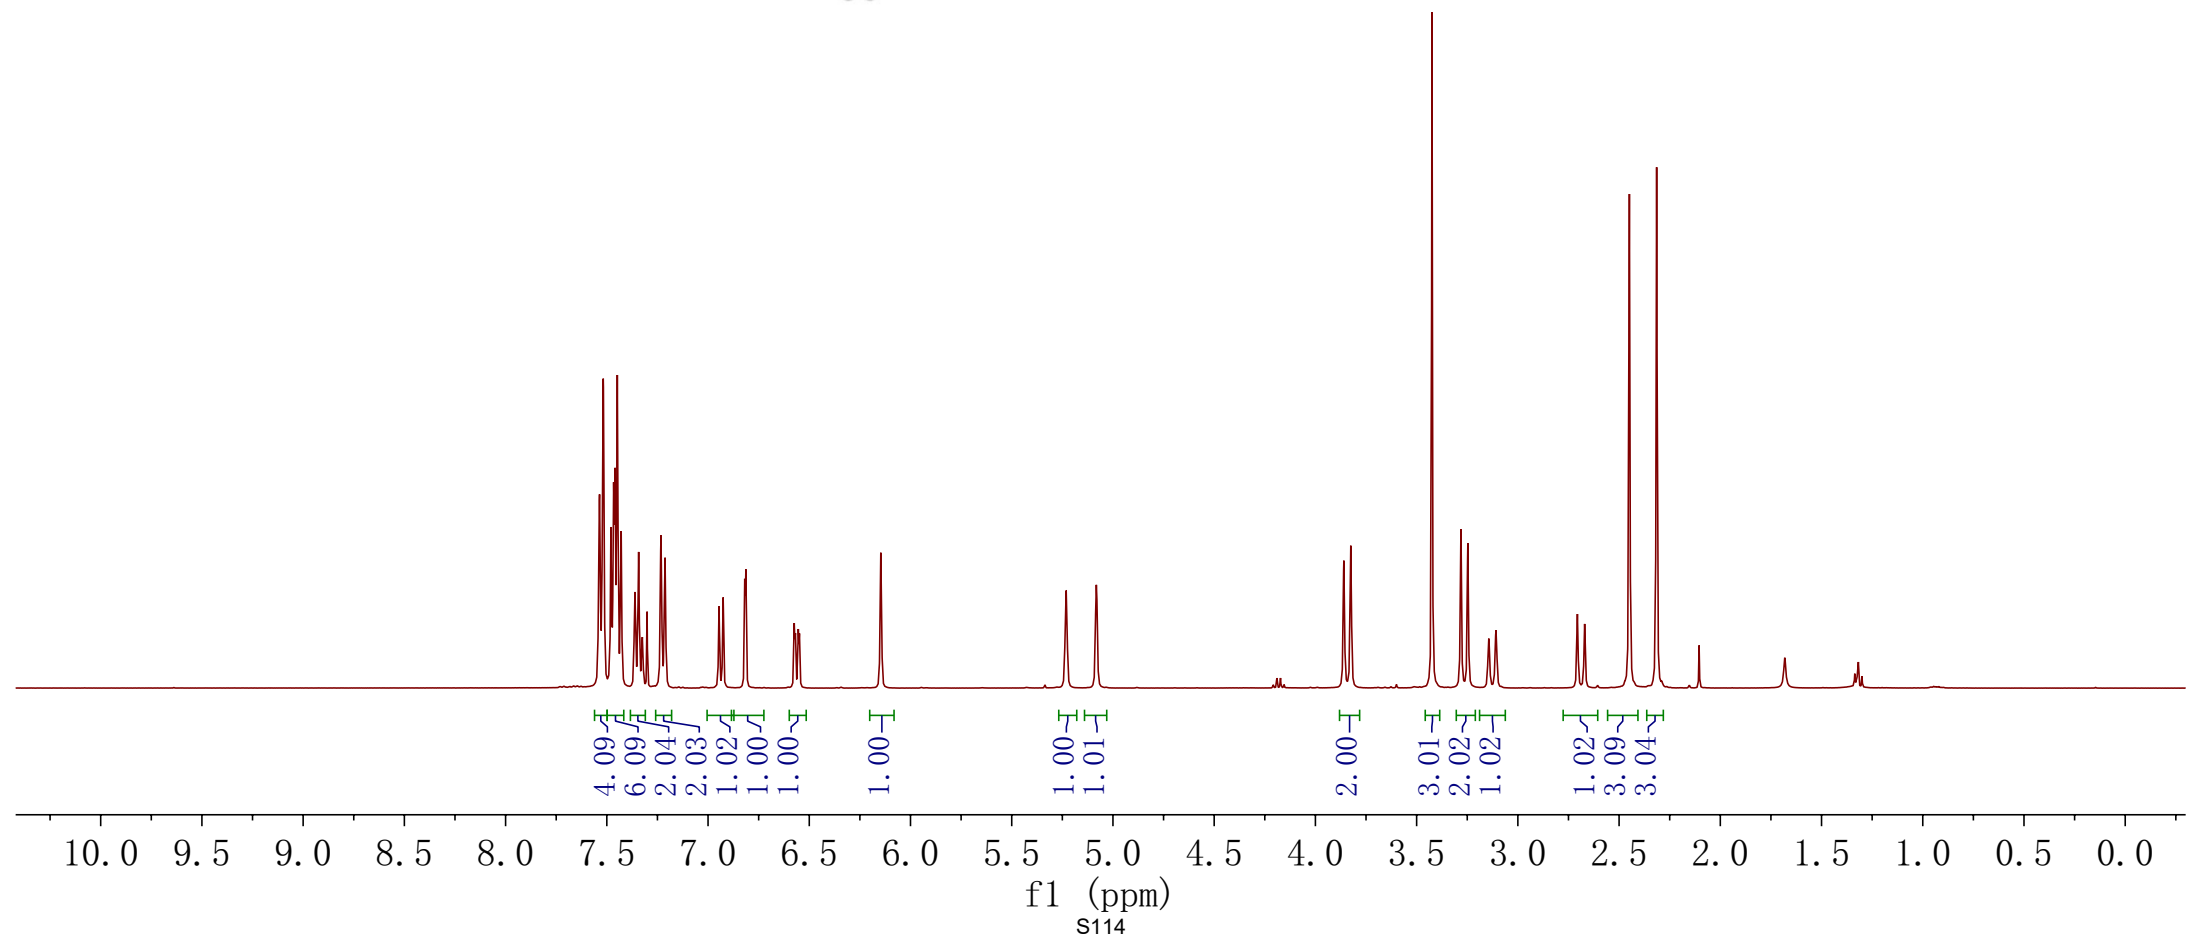

143.39  
140.41  
139.23  
136.76  
136.01  
134.43  
133.32  
131.51  
130.09  
129.40  
128.94  
128.76  
128.59  
128.23  
127.05  
117.68

89.33

58.46  
56.86  
56.42

21.64  
19.85

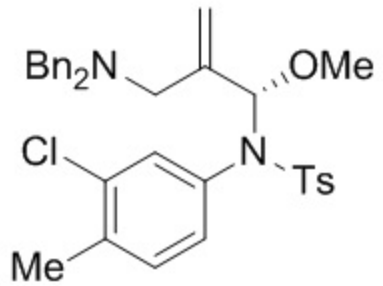

CDCl<sub>3</sub>, 100 MHz

3e'

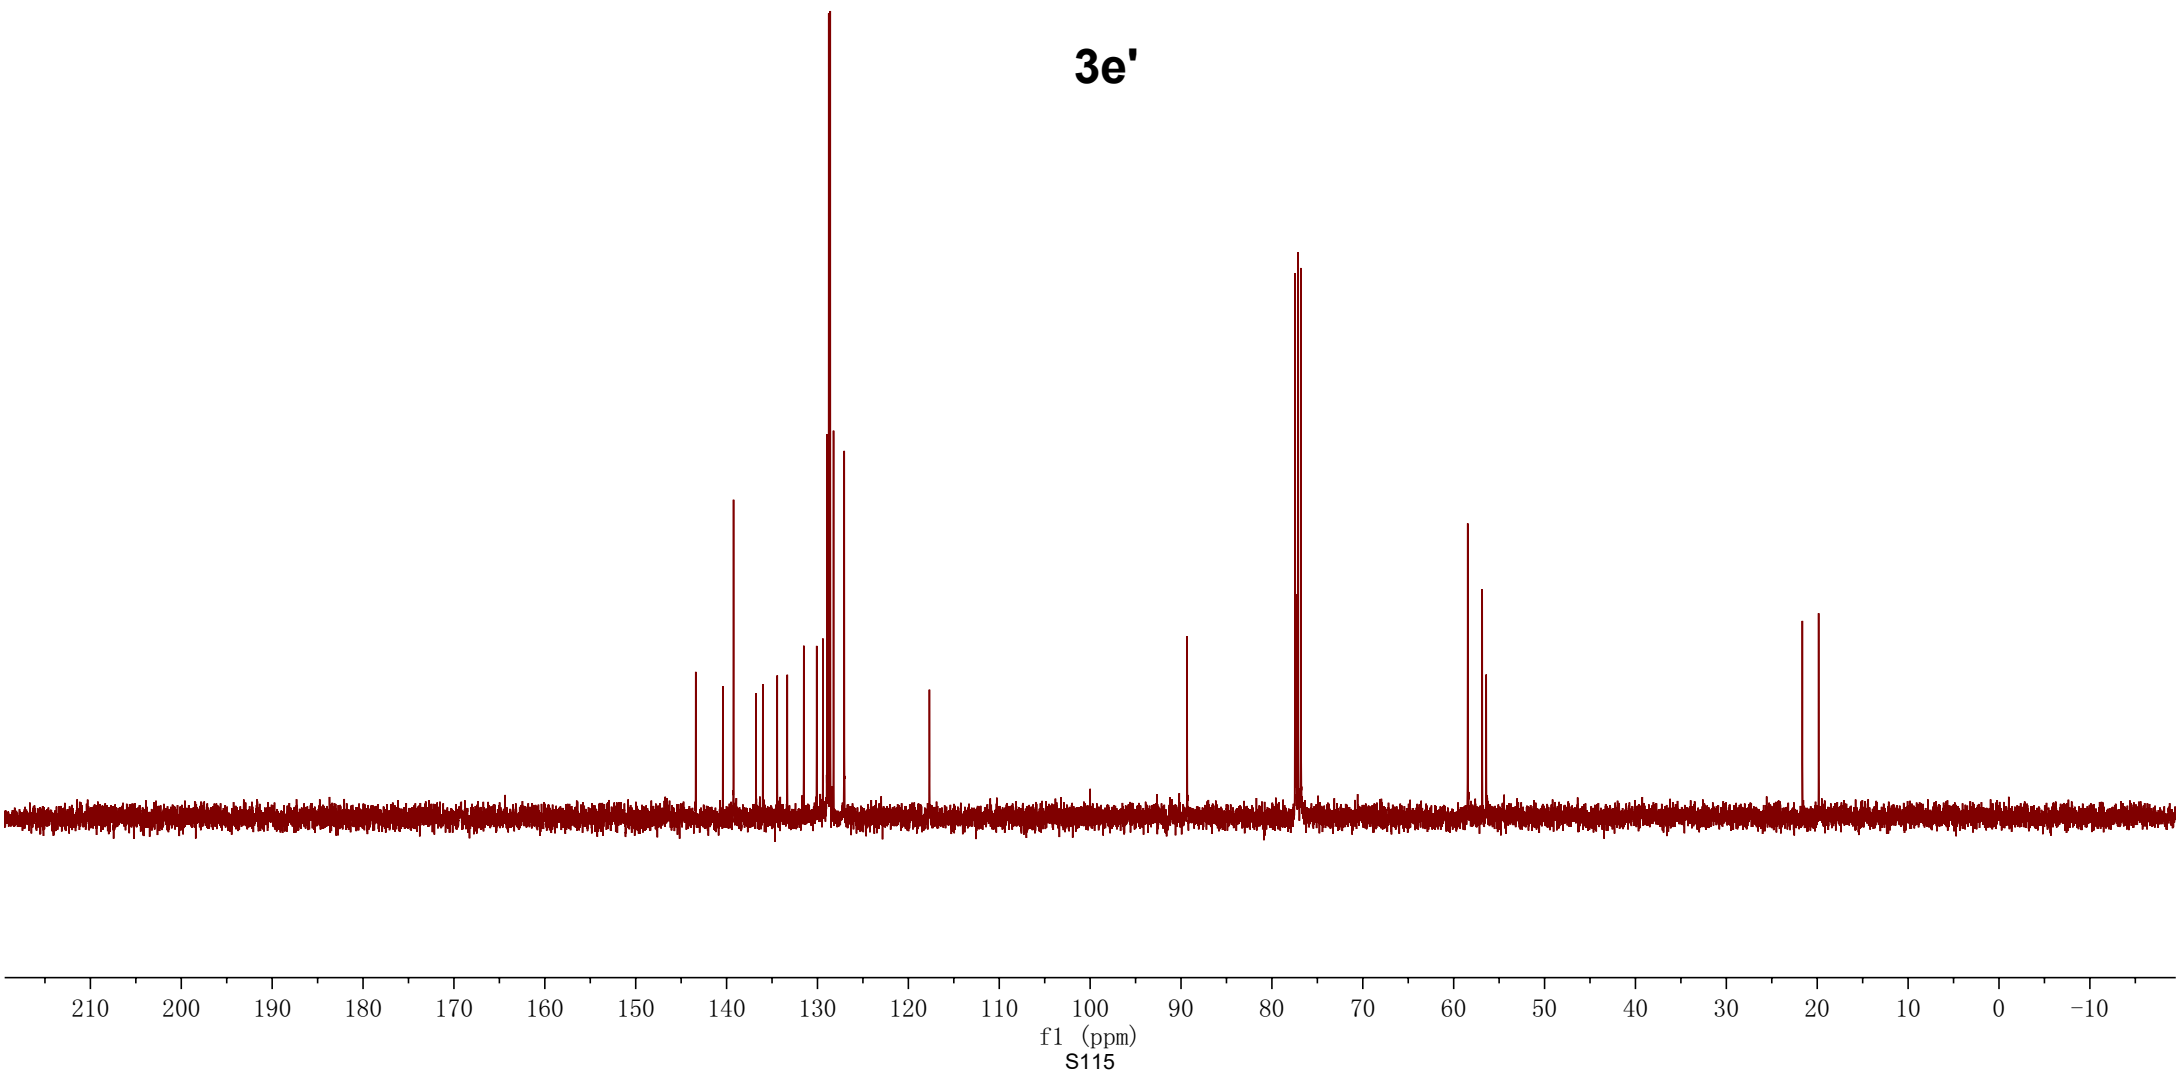

7.53  
7.51  
7.46  
7.44  
7.42  
7.35  
7.34  
7.32  
7.28  
7.22  
7.20  
7.18  
7.03  
7.01  
6.99  
6.82  
6.68  
6.66  
6.17

5.22  
5.08

3.86  
3.82

3.42  
3.26  
3.23  
3.13  
3.10

2.69  
2.65

2.43

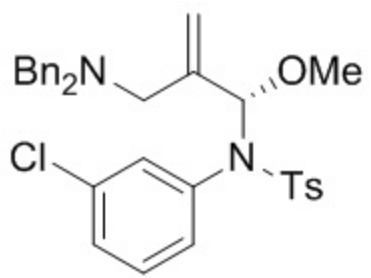

CDCl<sub>3</sub>, 400 MHz

3f'

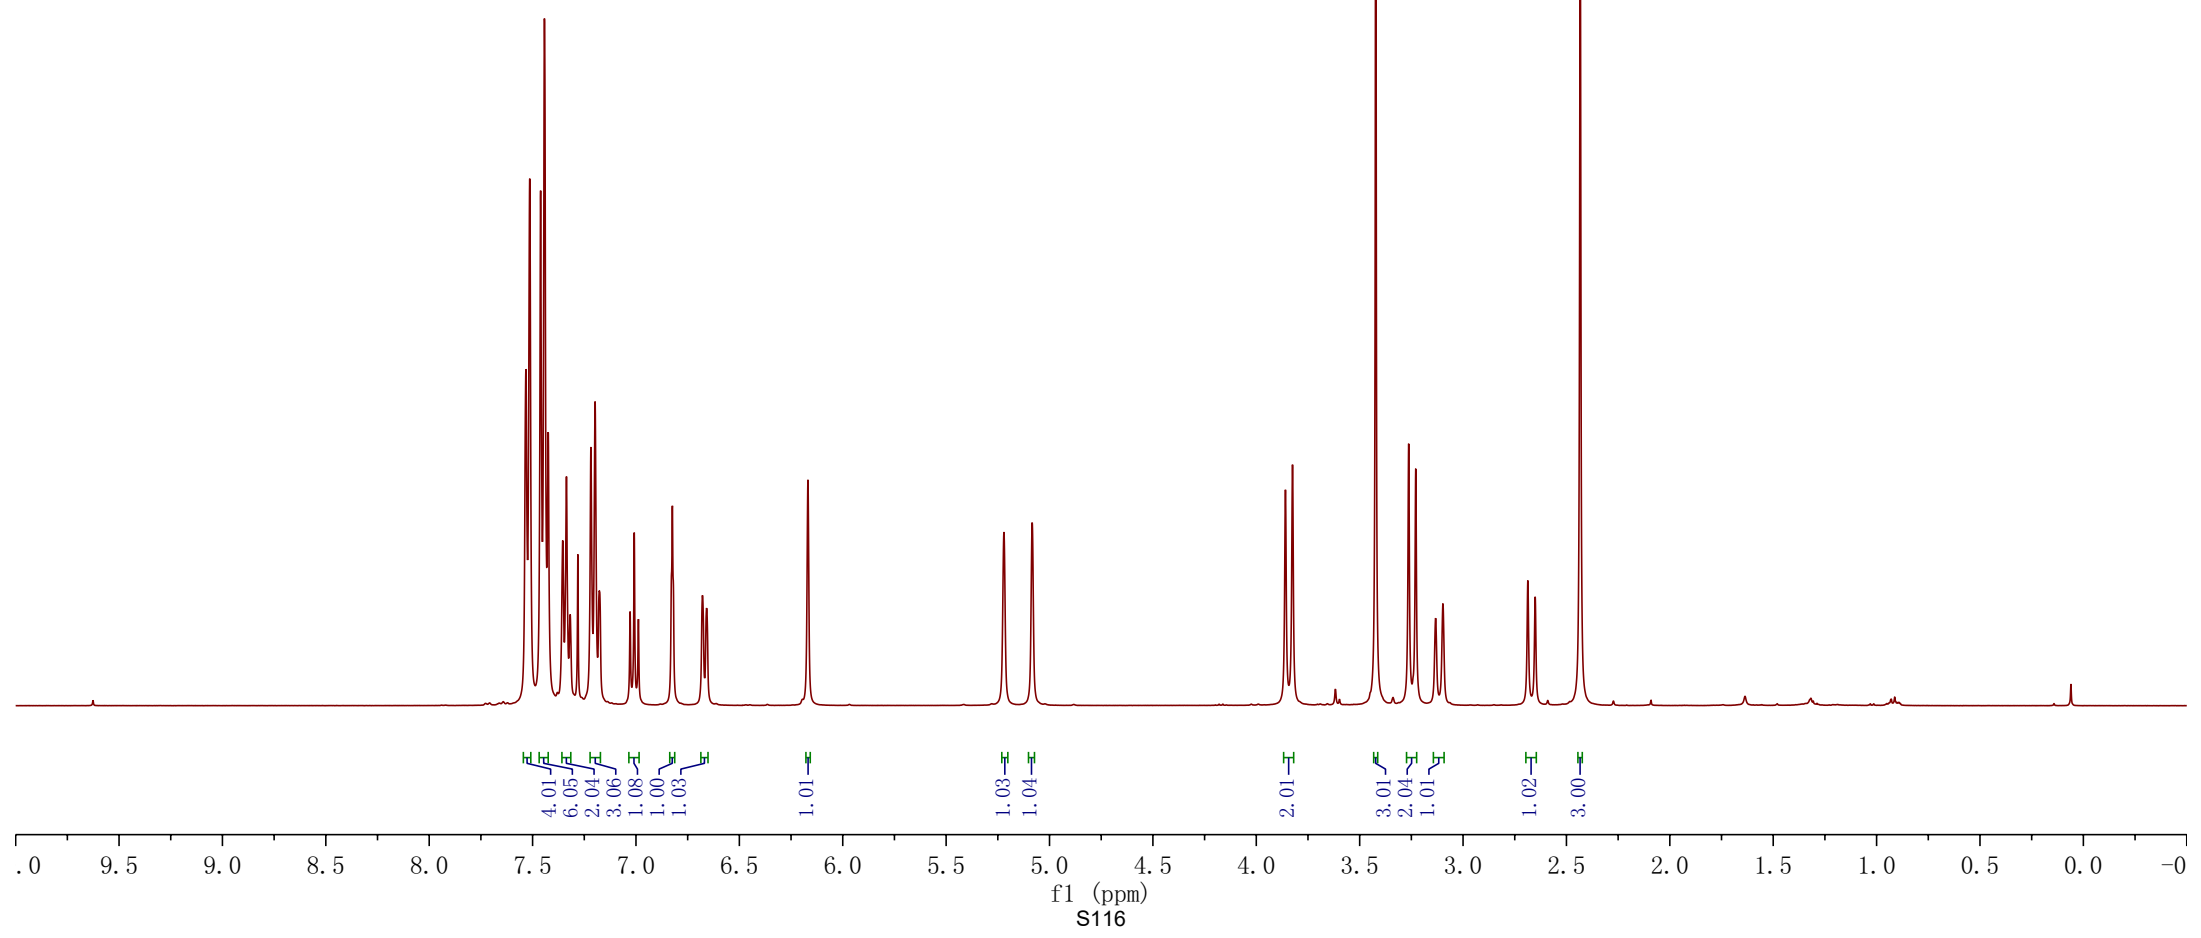

143.49  
140.33  
139.19  
137.07  
136.61  
133.29  
131.28  
129.40  
128.95  
128.86  
128.77  
128.60  
128.26  
128.21  
127.07  
117.82

89.31

58.48  
56.91  
56.41

21.62

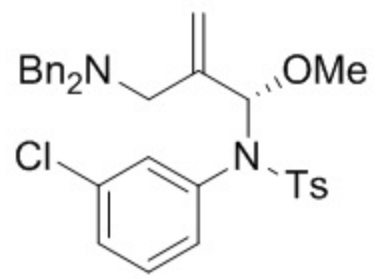

CDCl<sub>3</sub>, 75 MHz

3f'

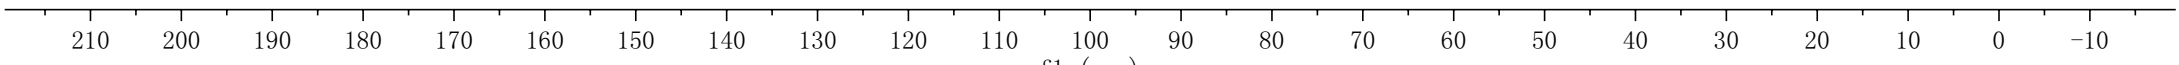

S117





149.89  
145.40  
139.71  
139.13  
130.93  
129.48  
128.75  
128.60  
128.51  
128.33  
127.08  
118.37

89.45

58.51  
56.84  
56.39

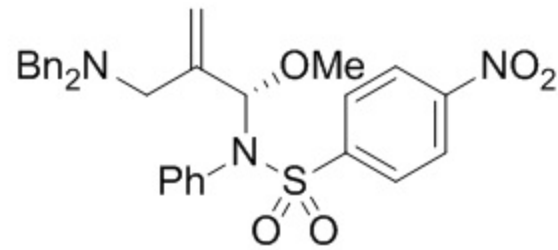

CDCl<sub>3</sub>, 75 MHz

3g'

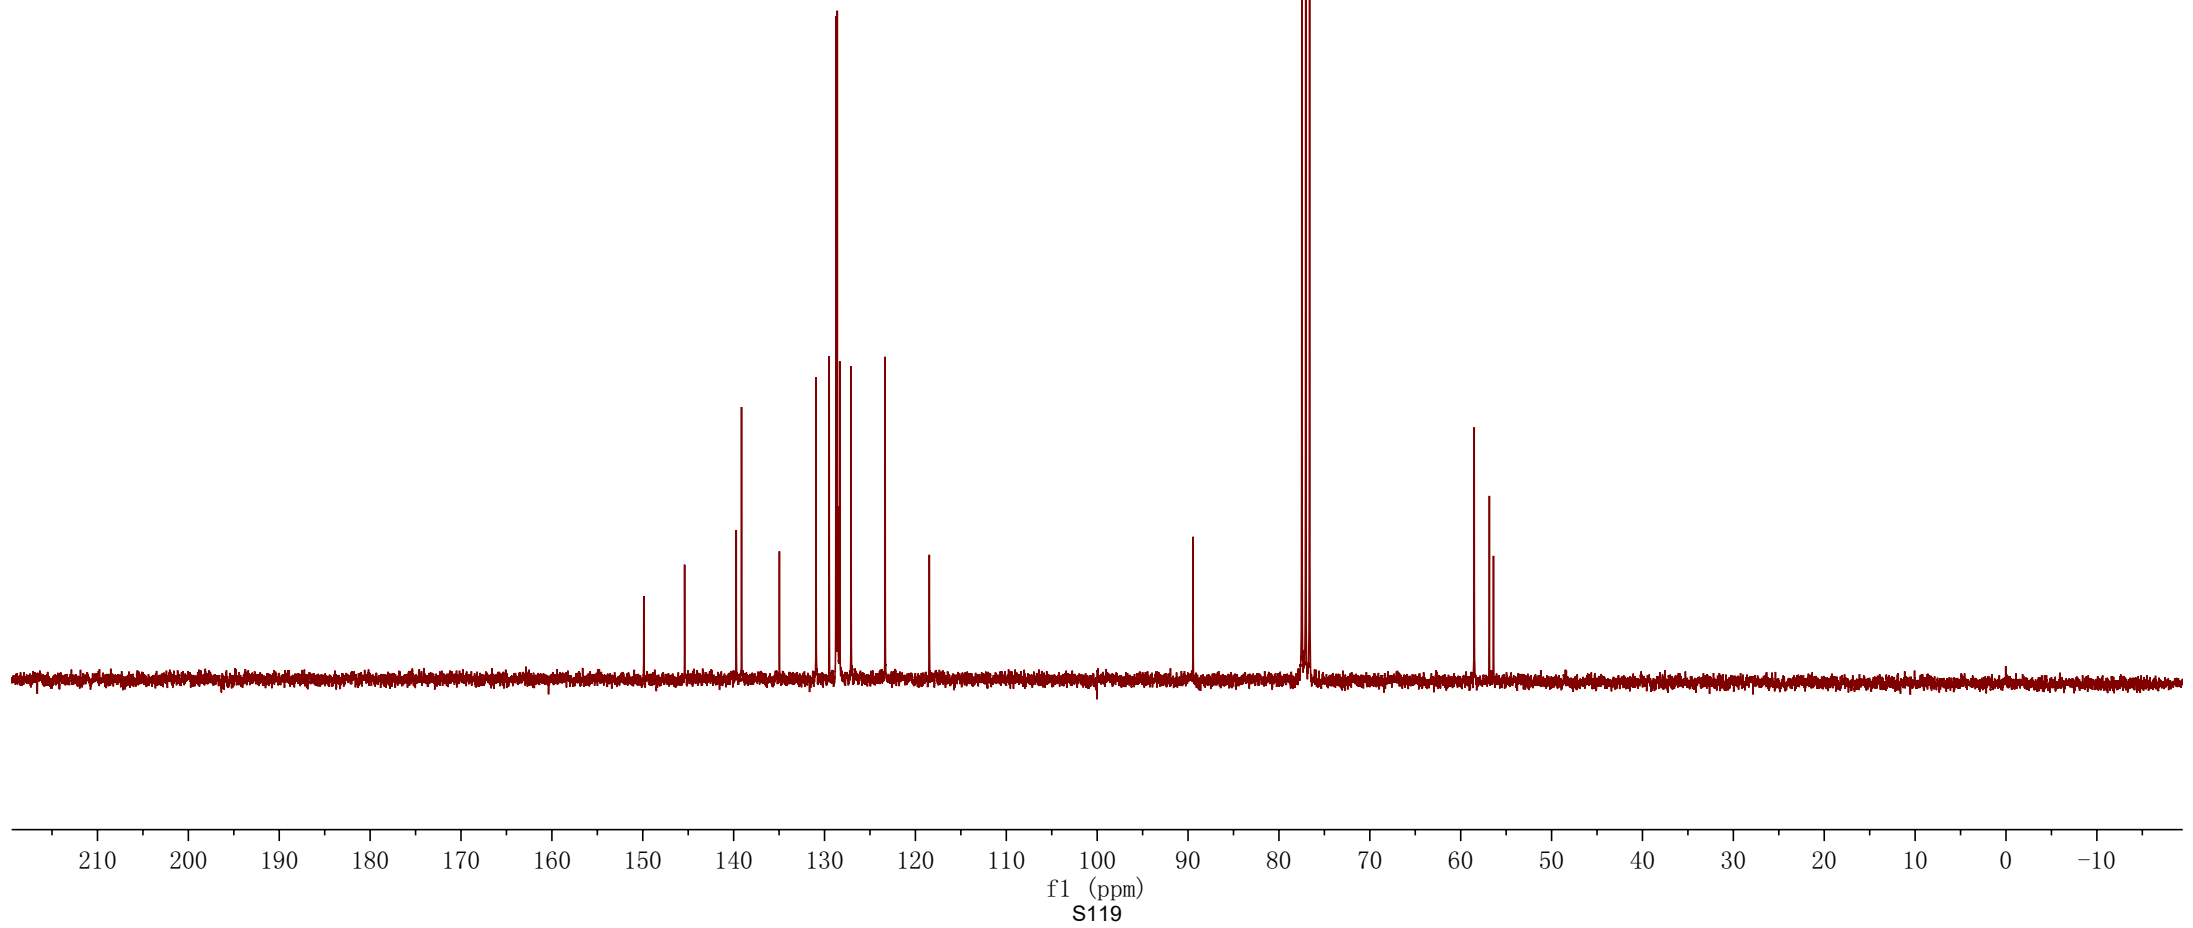

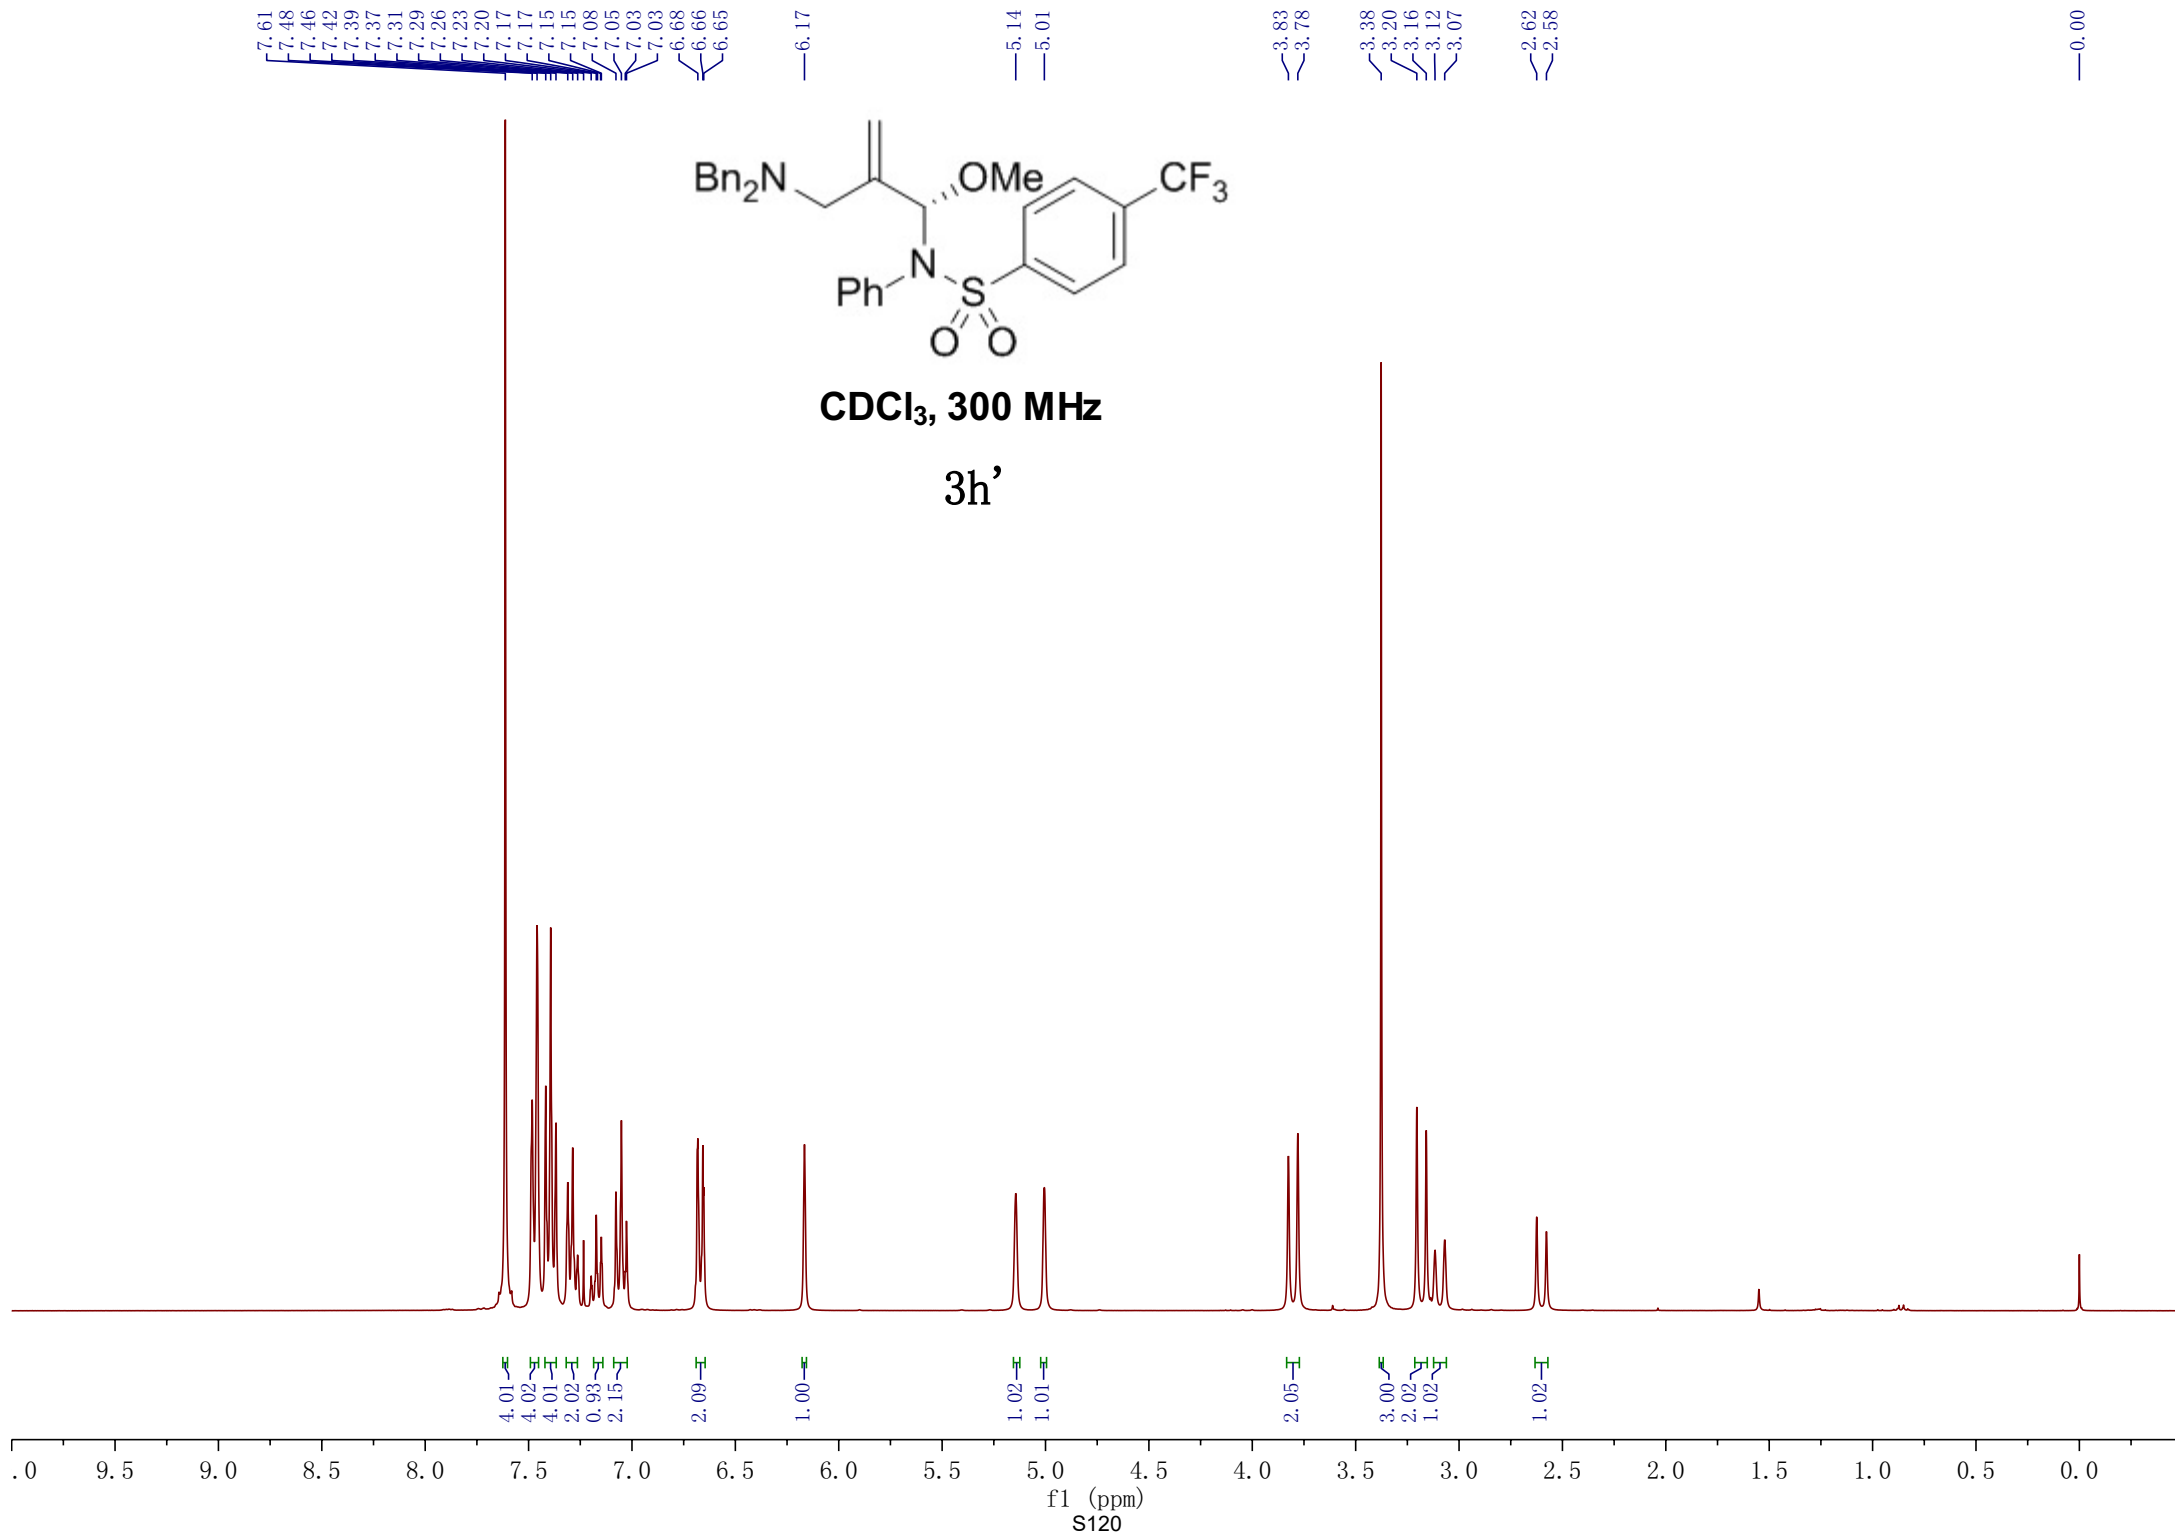



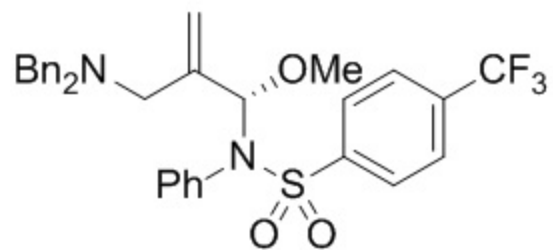

CDCl<sub>3</sub>, 282 MHz

3h'

62.97

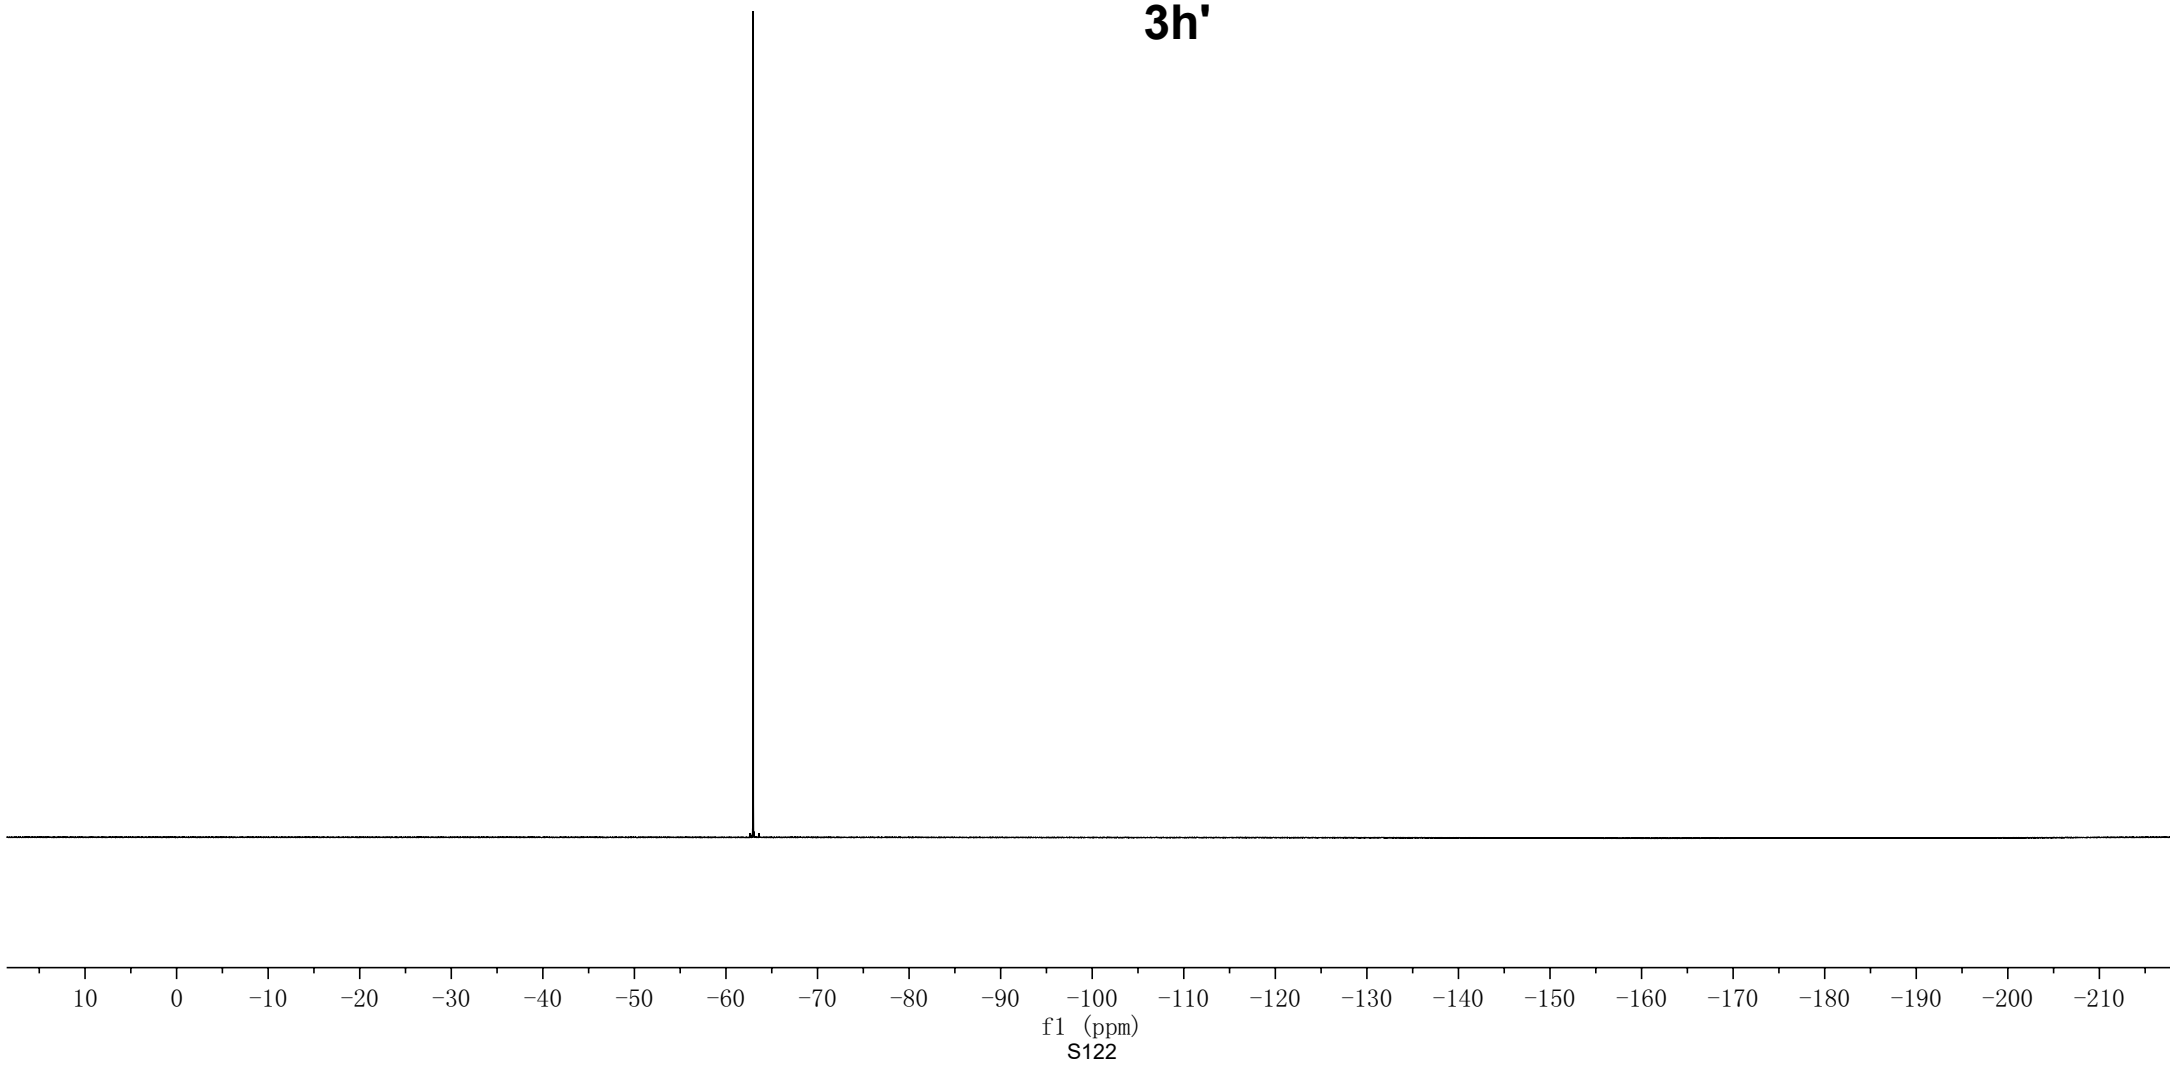

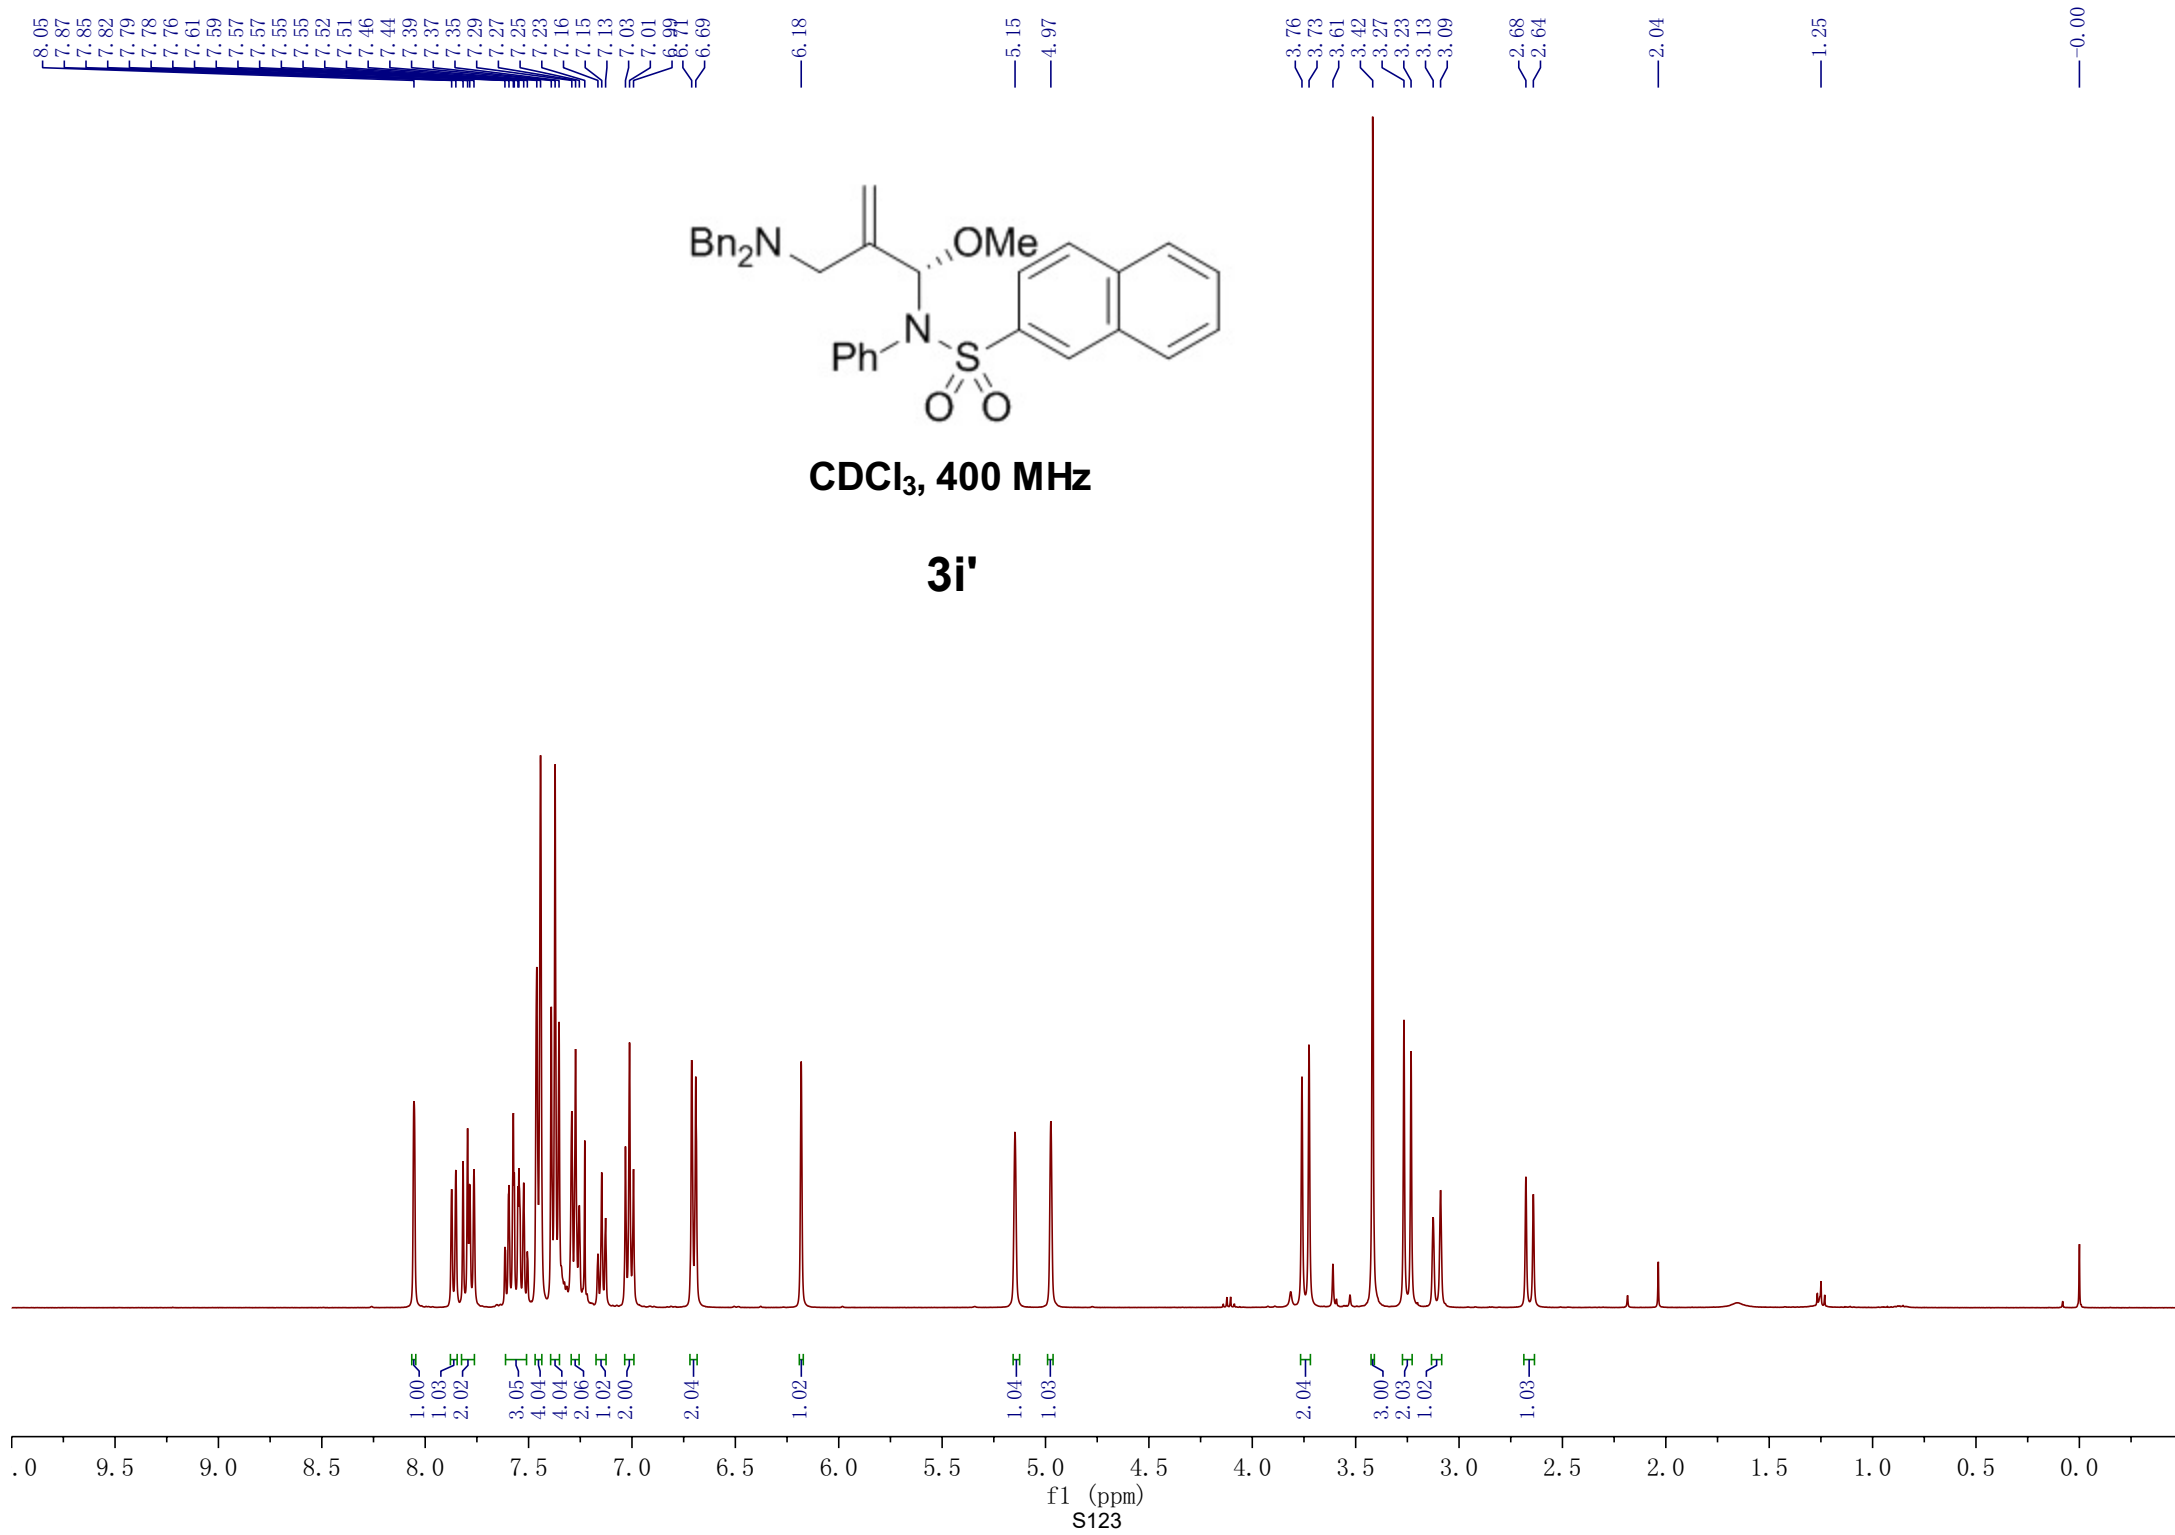

140.50  
139.25  
136.91  
135.54  
134.78  
131.86  
131.36  
129.55  
129.29  
128.75  
128.63  
128.53  
128.21  
128.14  
128.10  
127.84  
127.17  
126.99  
123.68  
117.36

89.43

58.42  
56.74  
56.39

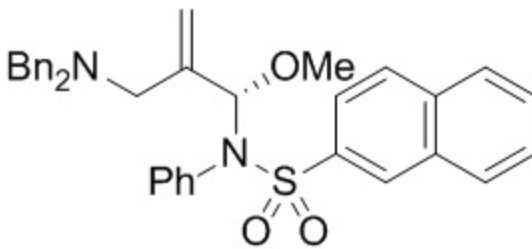

**CDCl<sub>3</sub>, 75 MHz**

**3i'**

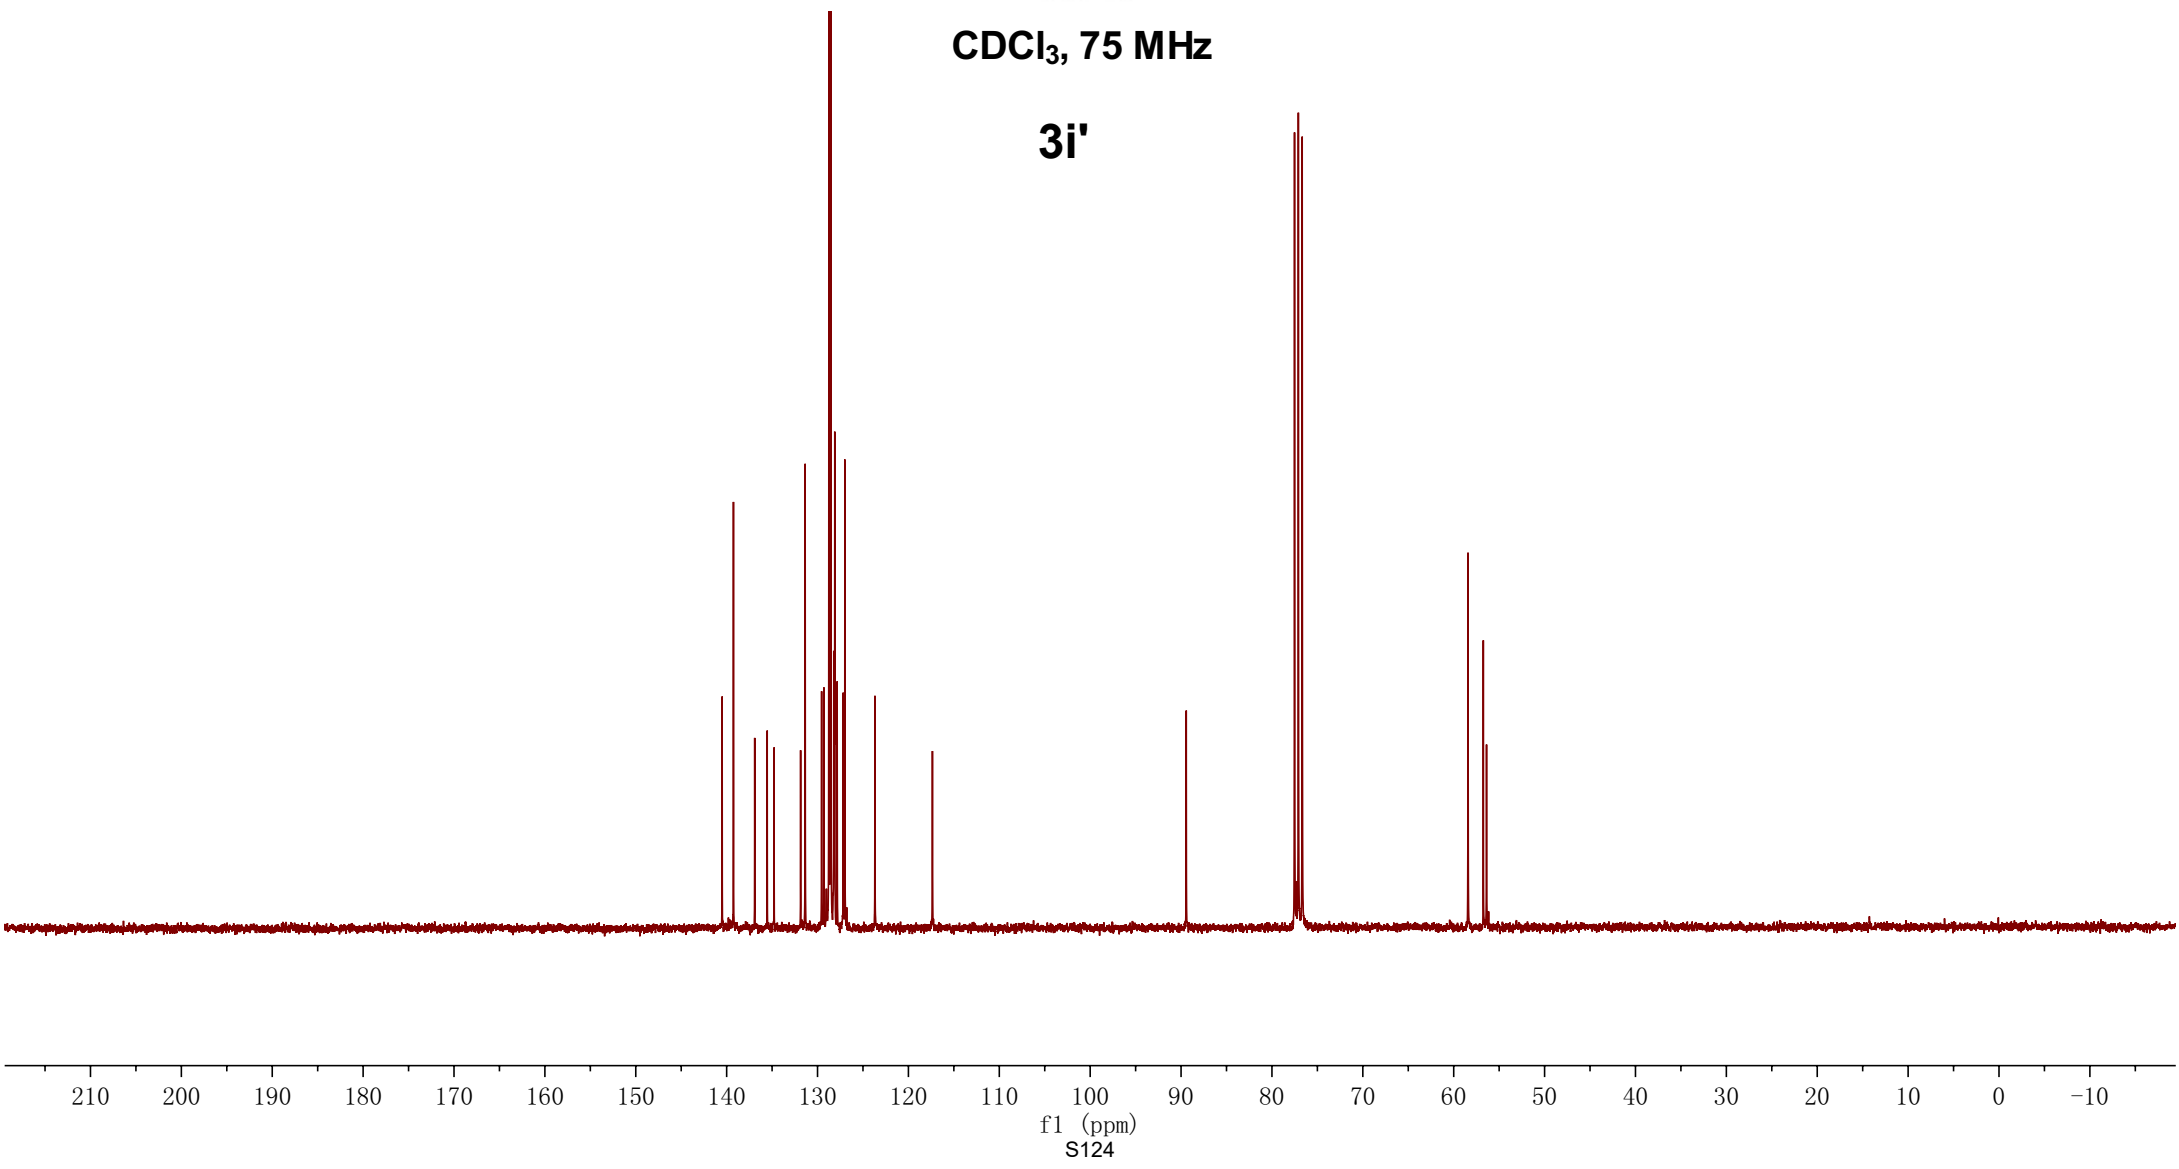

7.41  
7.38  
7.35  
7.32  
7.26  
7.16  
7.14  
7.13  
7.08  
7.05  
7.04  
7.03  
6.93  
6.90  
6.77  
6.74  
6.74  
6.08

5.12  
4.97

3.82  
3.67  
3.63  
3.40  
3.20  
3.15  
3.08  
3.03

2.65  
2.60  
2.39

1.57

0.00

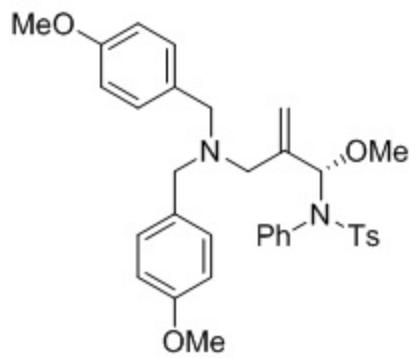

**CDCl<sub>3</sub>, 300 MHz**

**3j'**

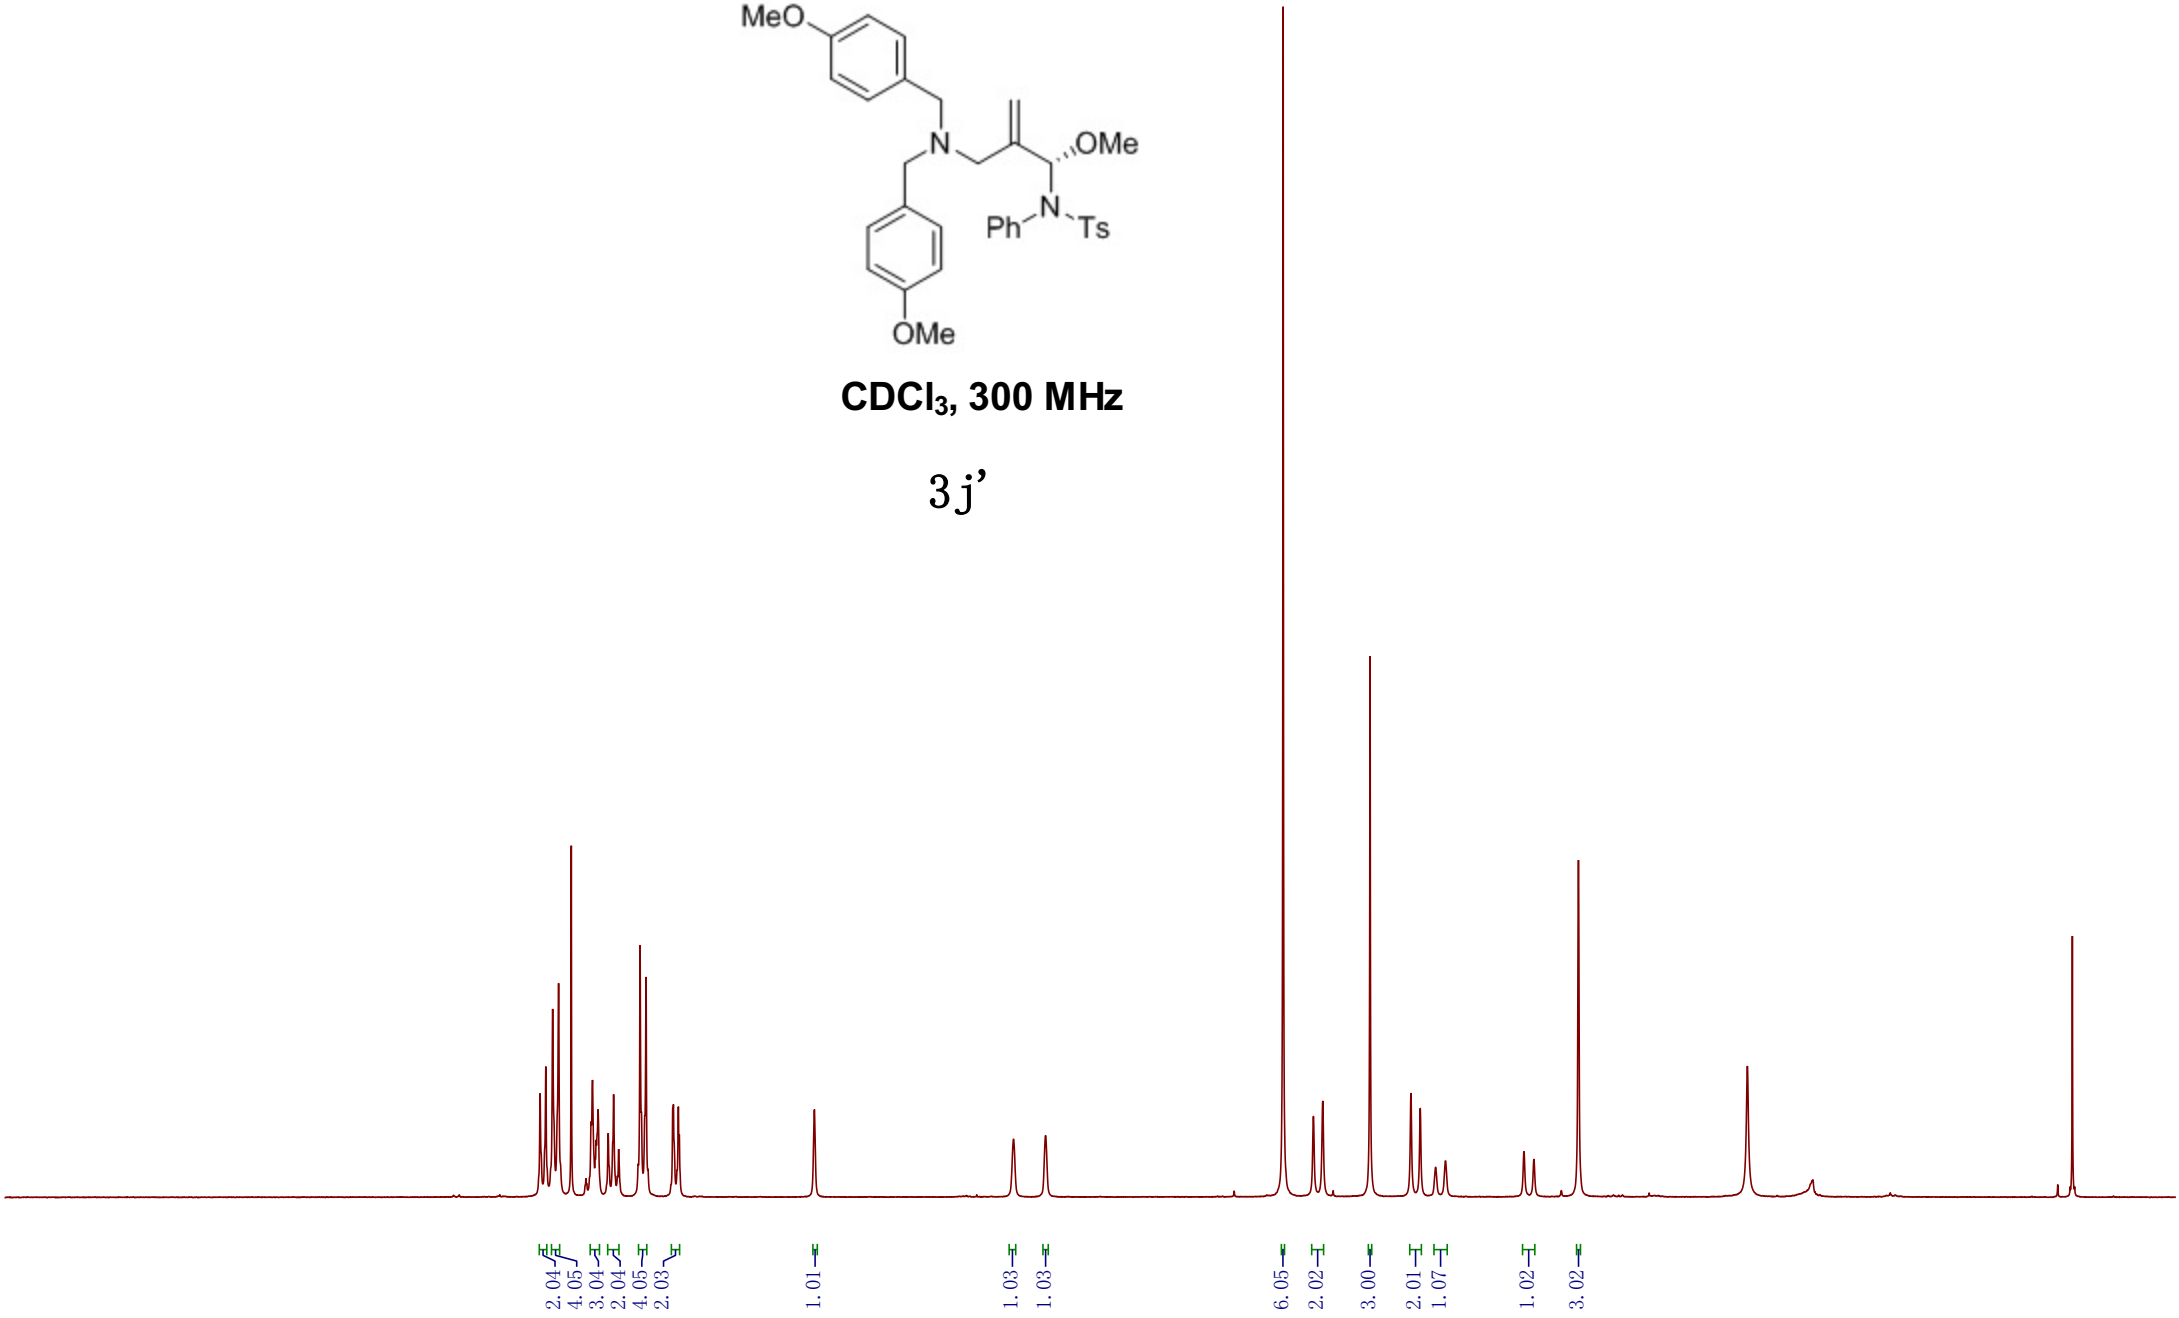

2.04  
4.05  
3.04  
2.04  
4.05  
2.03

1.01

1.03  
1.03

6.05  
2.02  
3.00  
2.01  
1.07

1.02  
3.02

10 9.5 9.0 8.5 8.0 7.5 7.0 6.5 6.0 5.5 5.0 4.5 4.0 3.5 3.0 2.5 2.0 1.5 1.0 0.5 0.0 -0

f1 (ppm)

S125

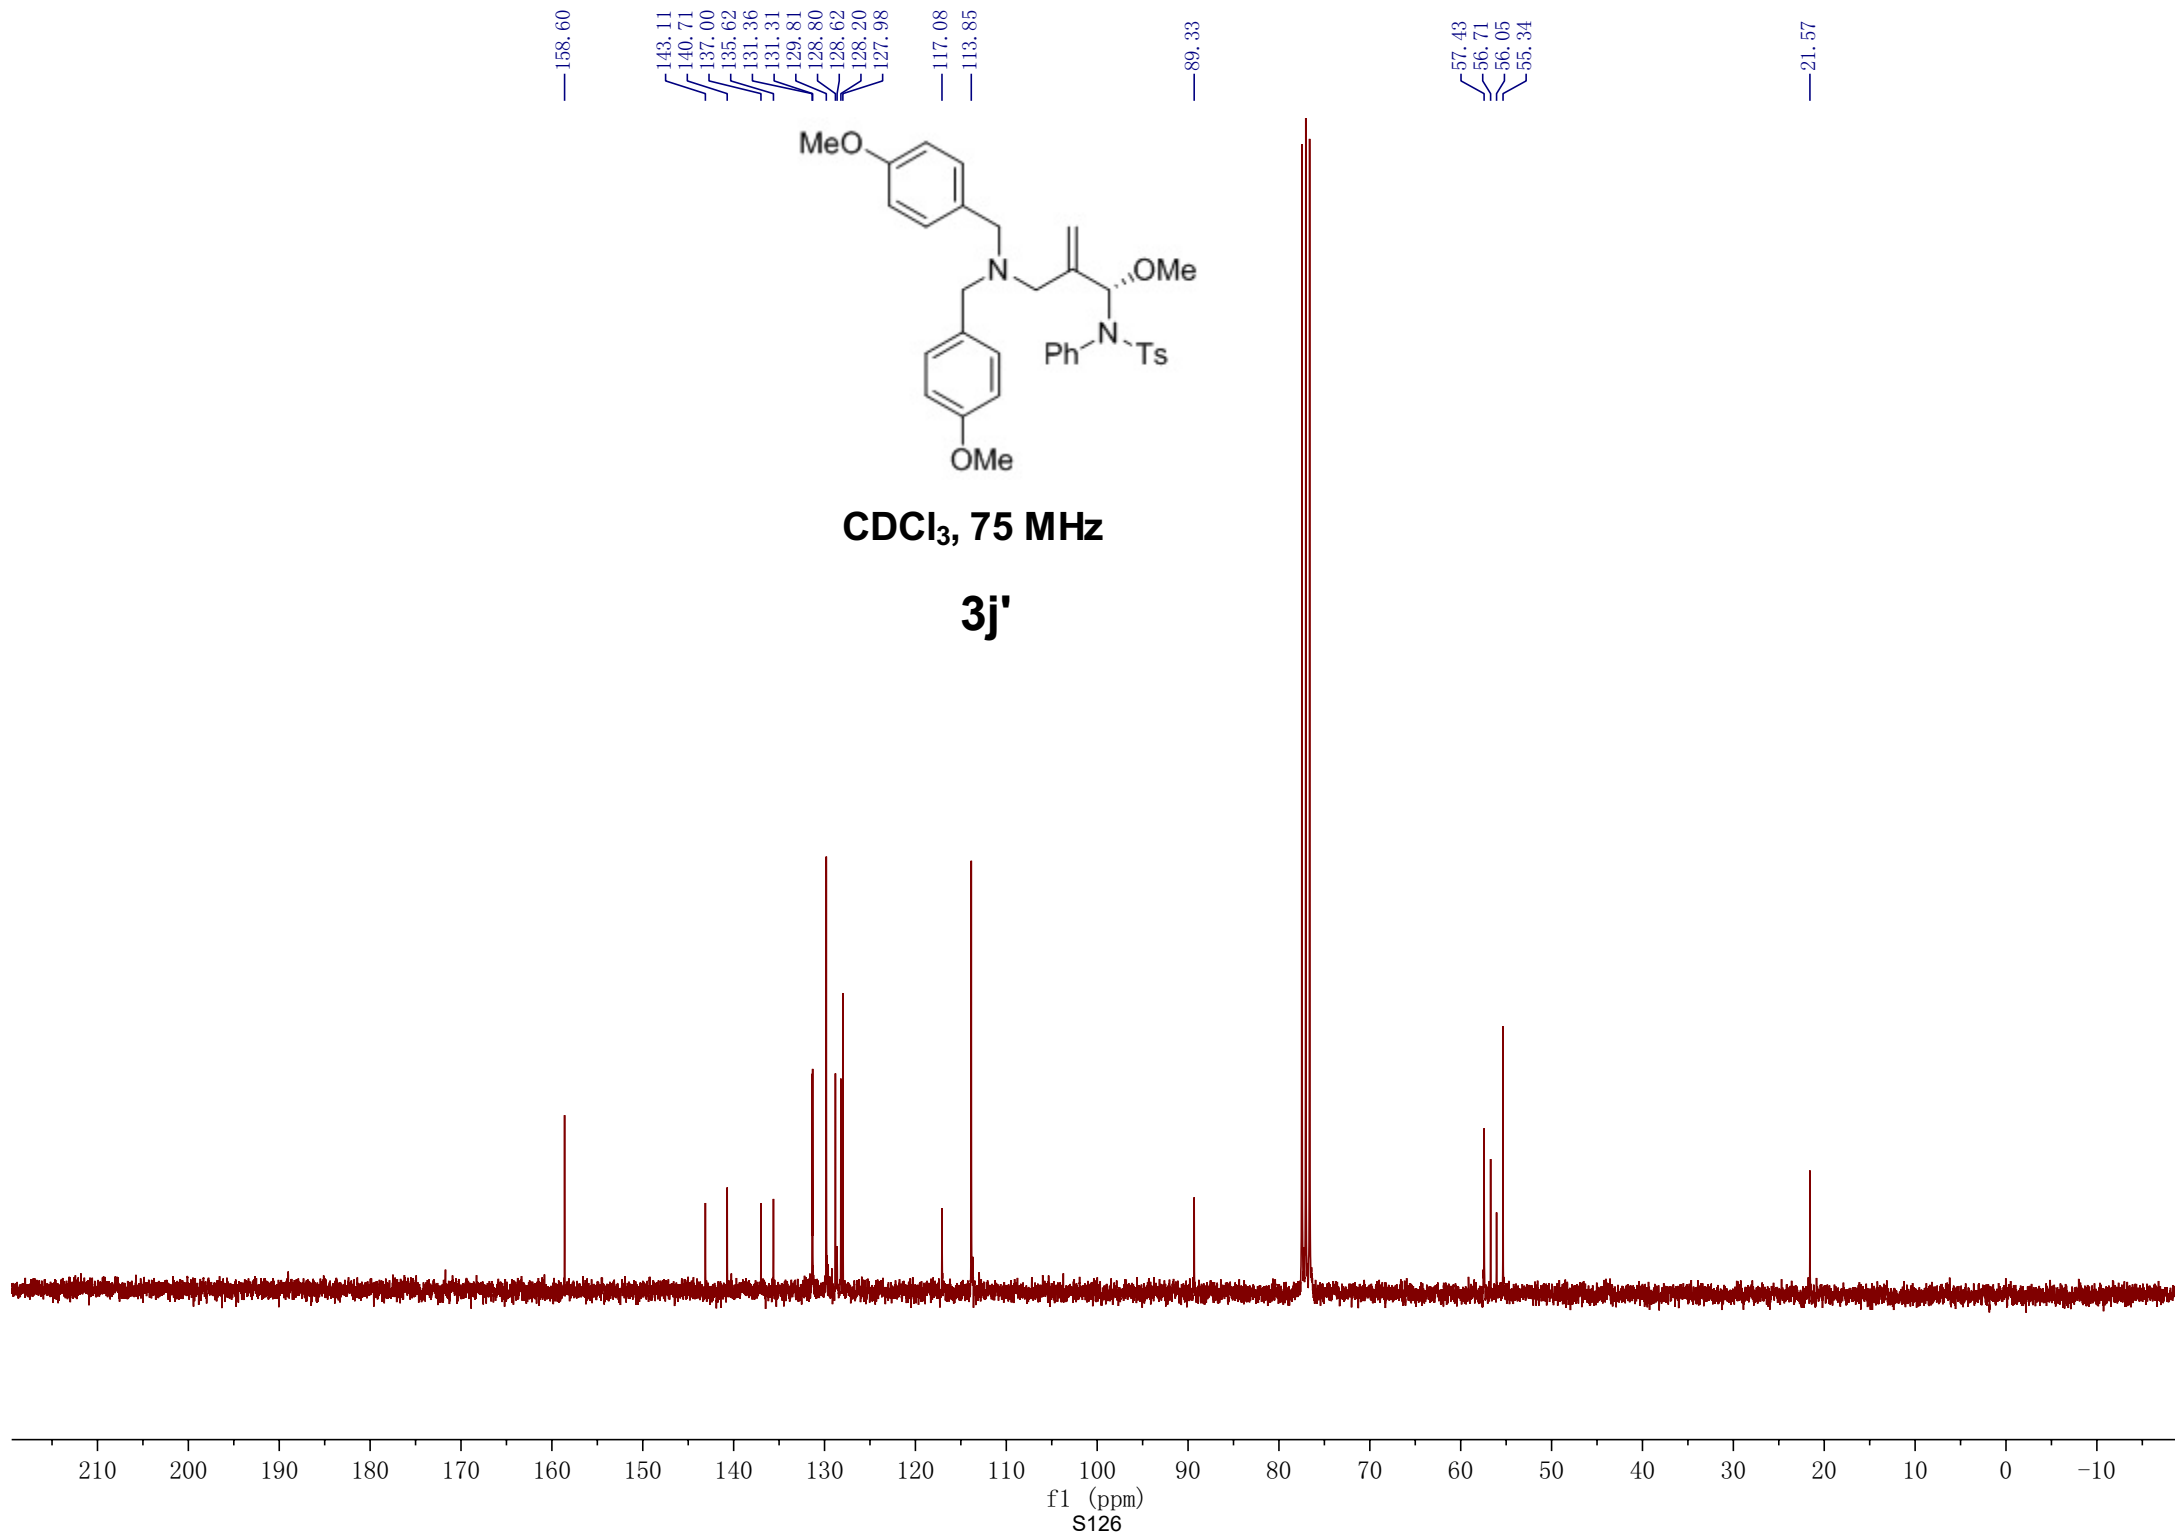



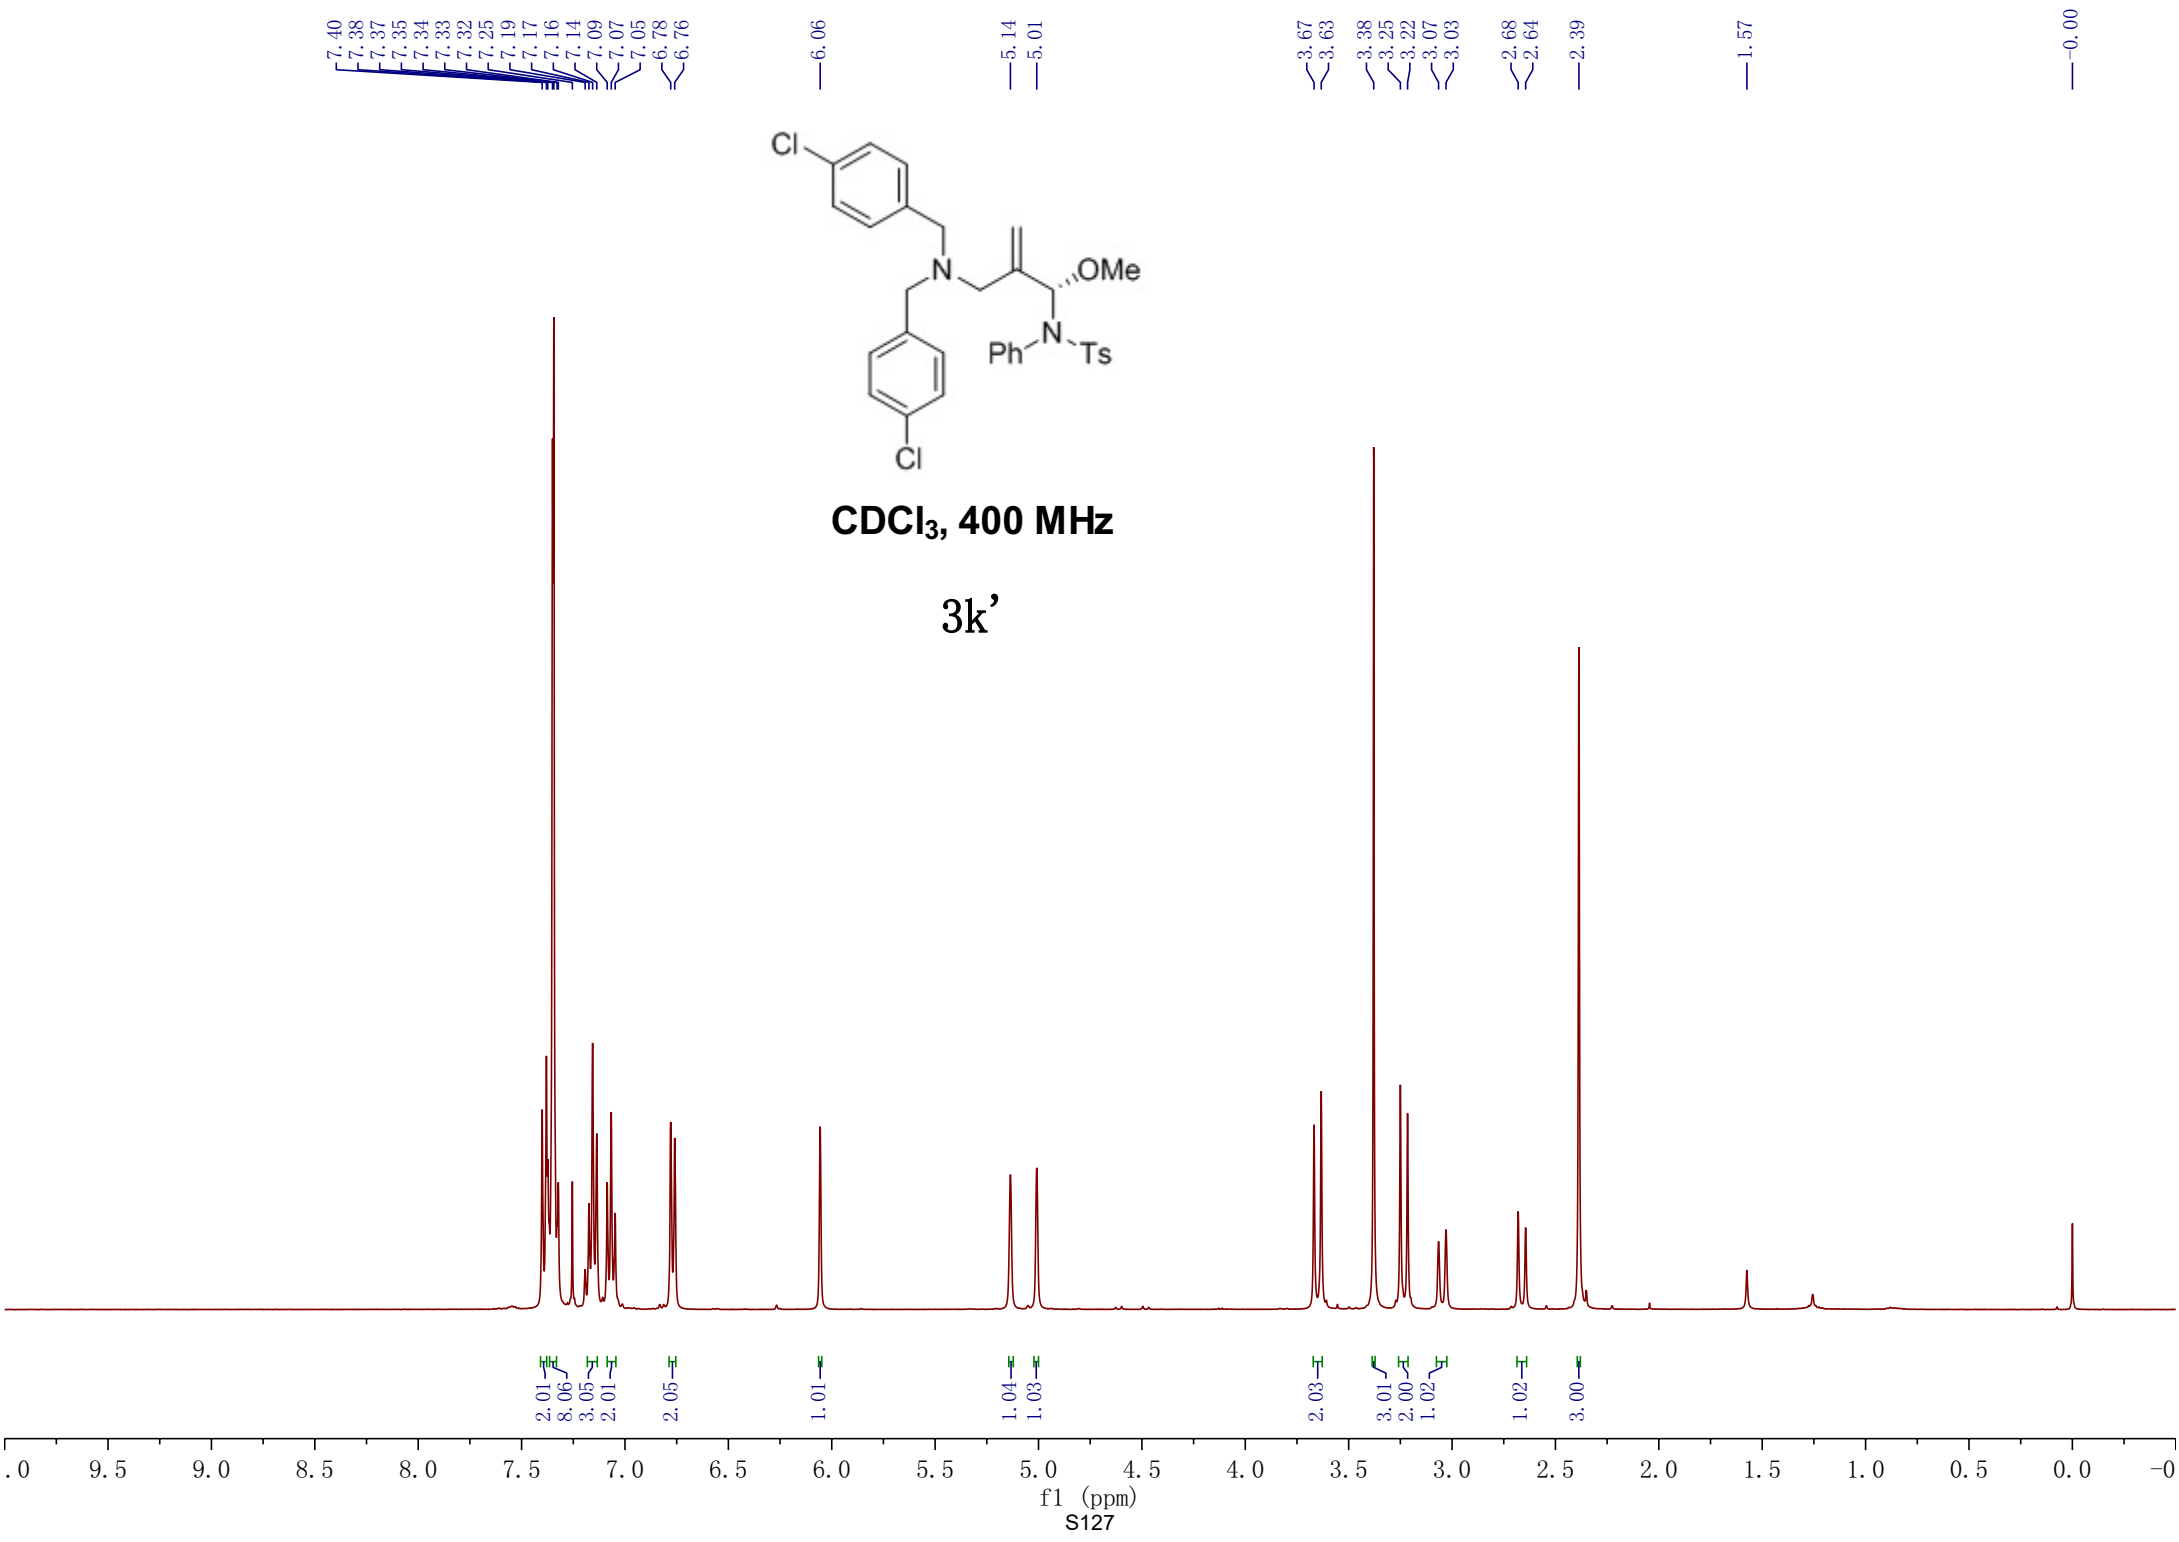

143.28  
140.28  
137.50  
136.72  
135.51  
132.73  
131.15  
129.92  
128.85  
128.69  
128.16  
128.09

117.35

89.28

57.63  
56.81  
56.24

21.58

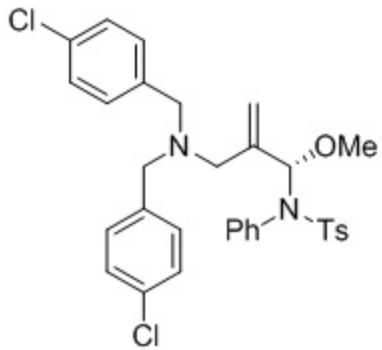

CDCl<sub>3</sub>, 75 MHz

3k'

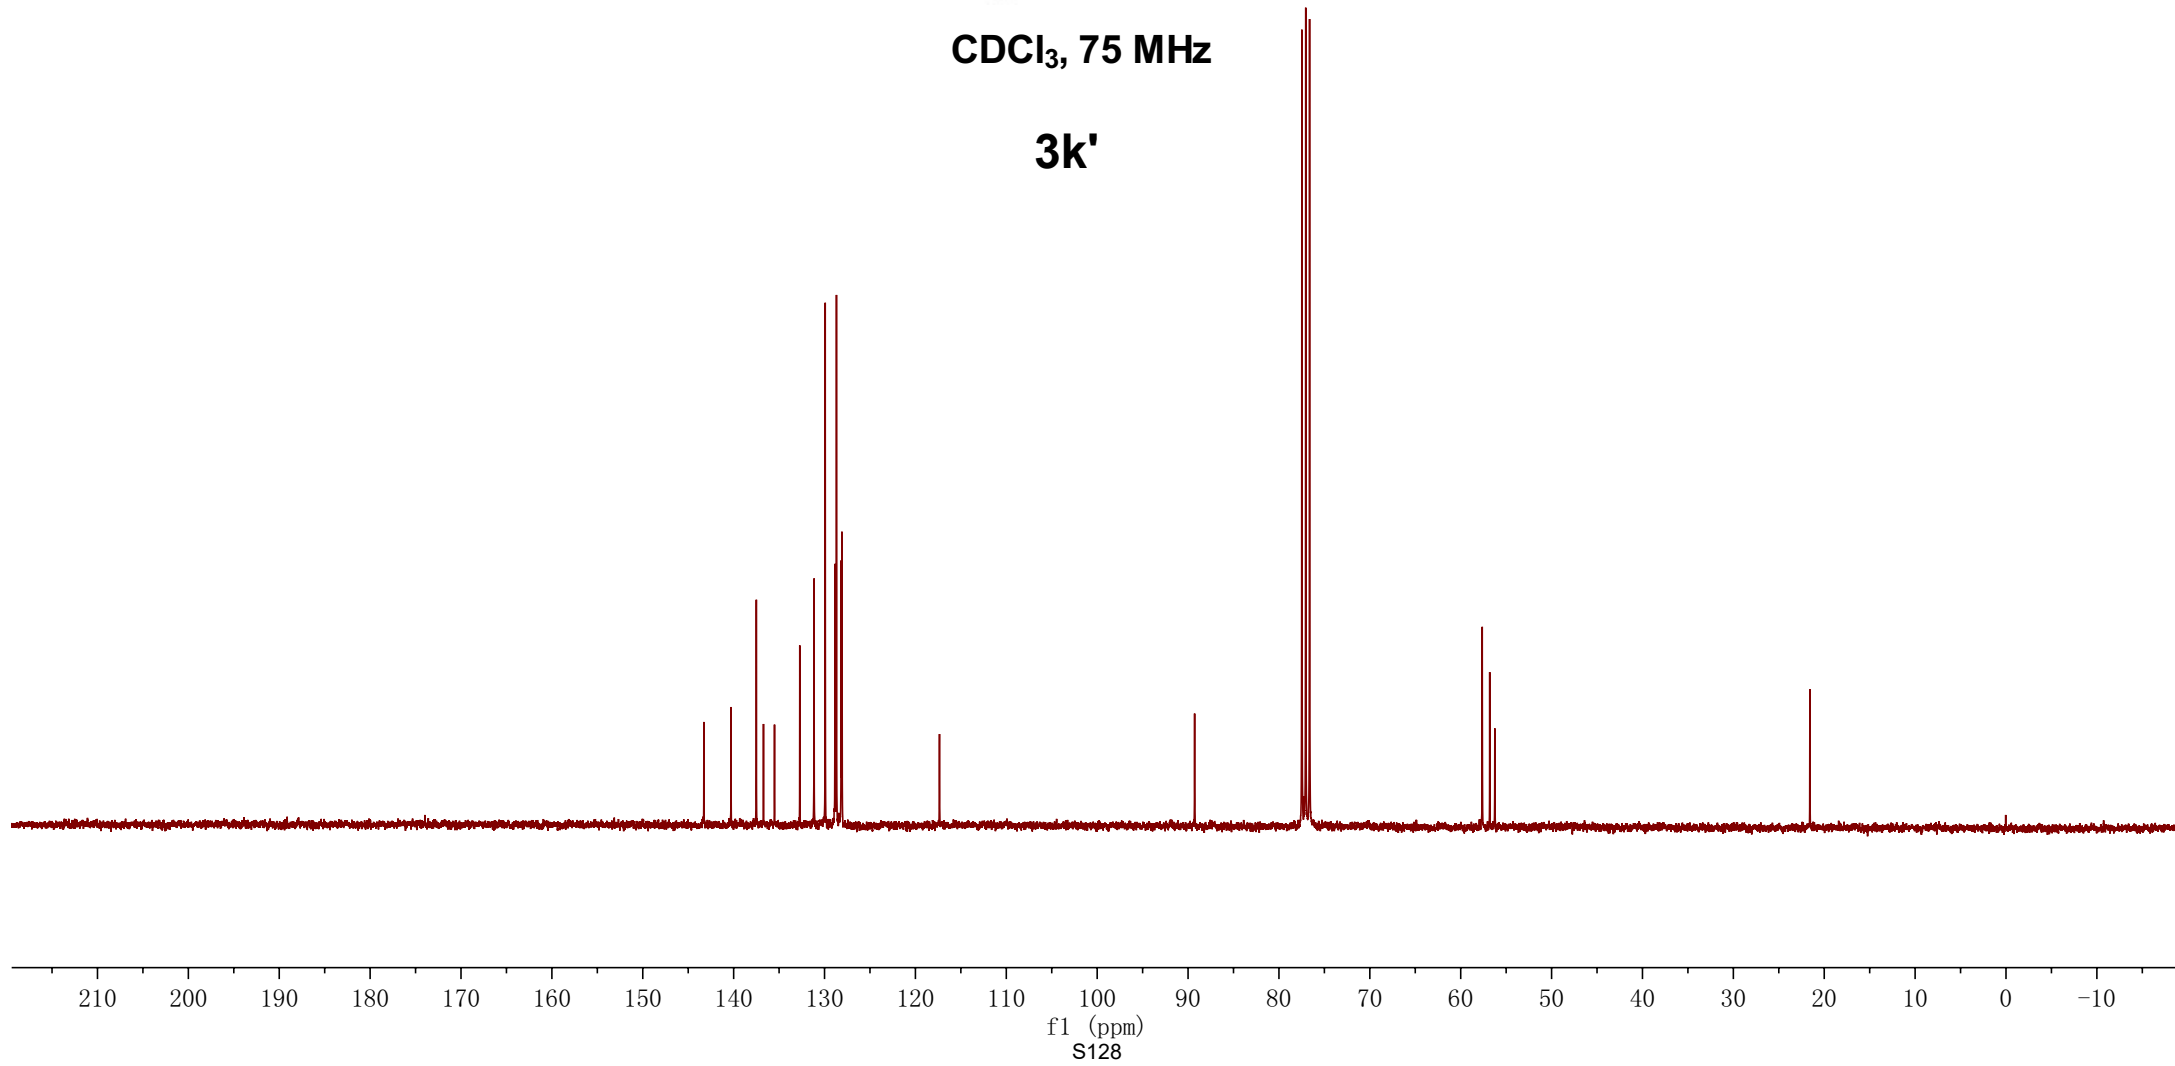

7.25  
7.17  
7.14  
7.13  
7.07  
7.04  
7.01  
6.86  
6.61  
6.59

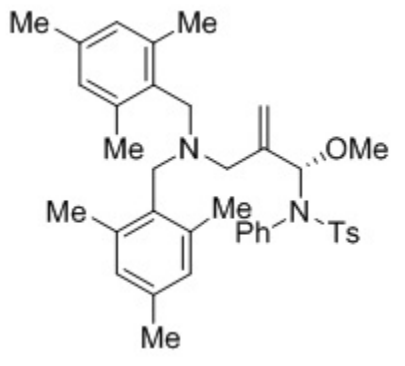

CDCl<sub>3</sub>, 300 MHz  
3I'

3.67  
3.63  
3.44  
3.27  
3.23  
3.08  
3.04

2.51  
2.47  
2.35  
2.33  
2.27  
2.05

1.57

0.00

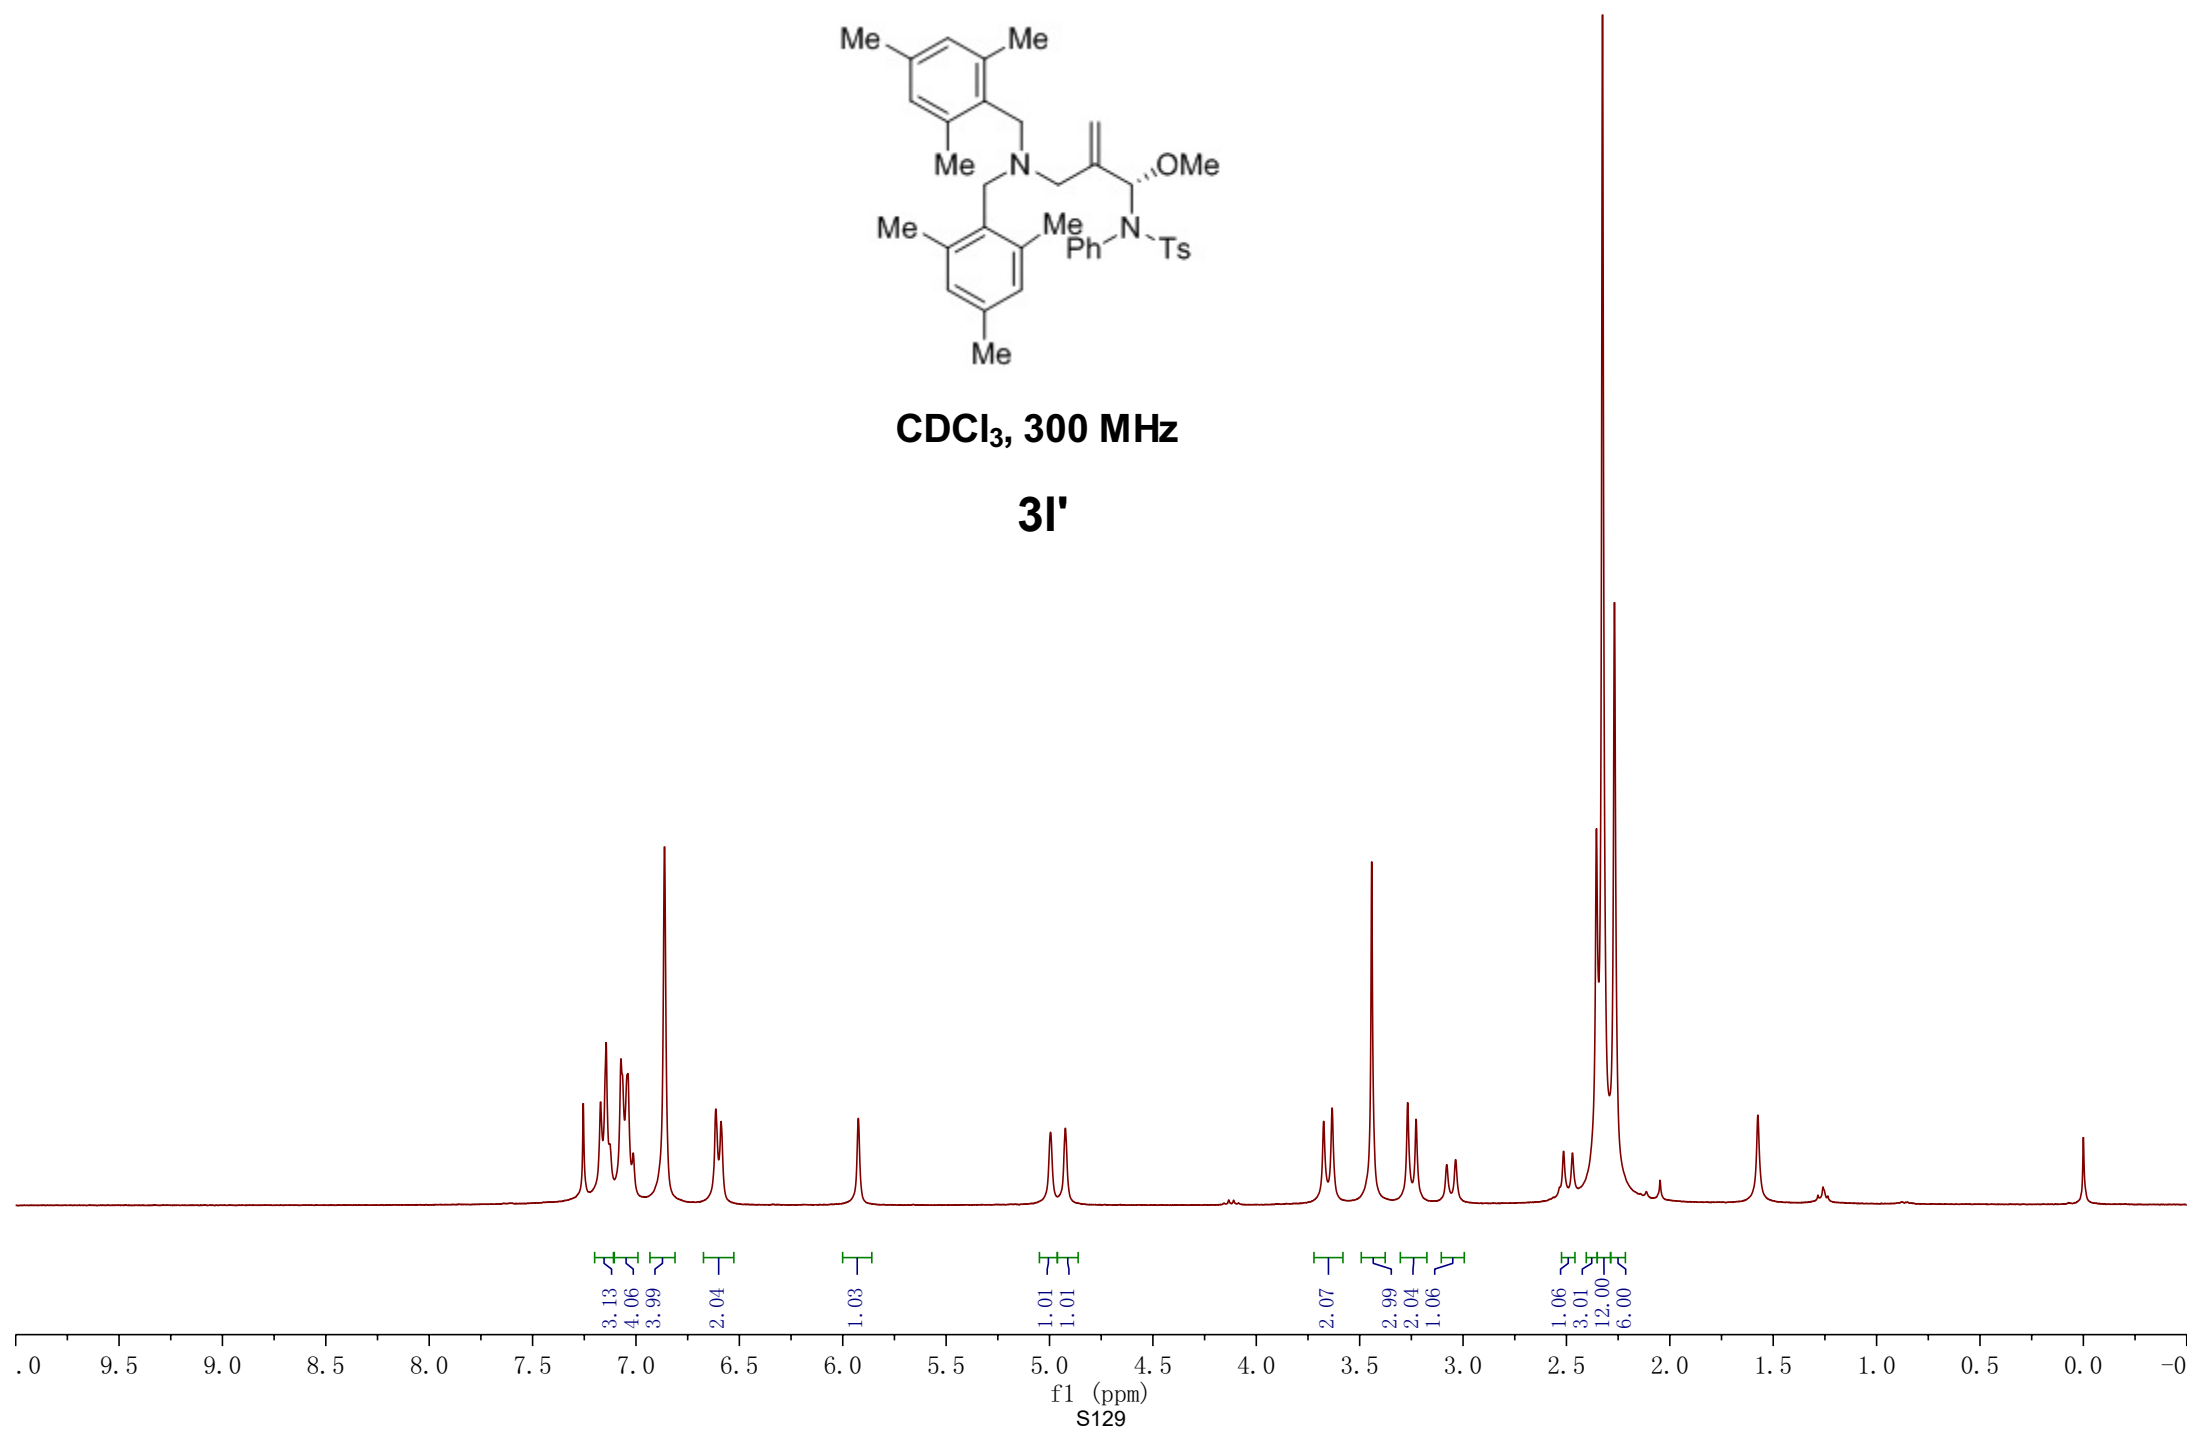



7.44  
7.43  
7.41  
7.38  
7.36  
7.34  
7.28  
7.26  
7.24  
7.17  
7.15  
7.14  
7.13  
7.12  
7.07  
7.05  
6.93  
6.91  
6.75  
6.73  
6.10

5.13  
4.98

3.81  
3.74  
3.70  
3.69  
3.66  
3.39  
3.24  
3.21  
3.18  
3.09  
3.06

2.66  
2.62

2.38

0.00

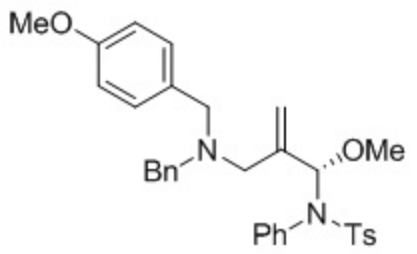

CDCl<sub>3</sub>, 400 MHz

3m'

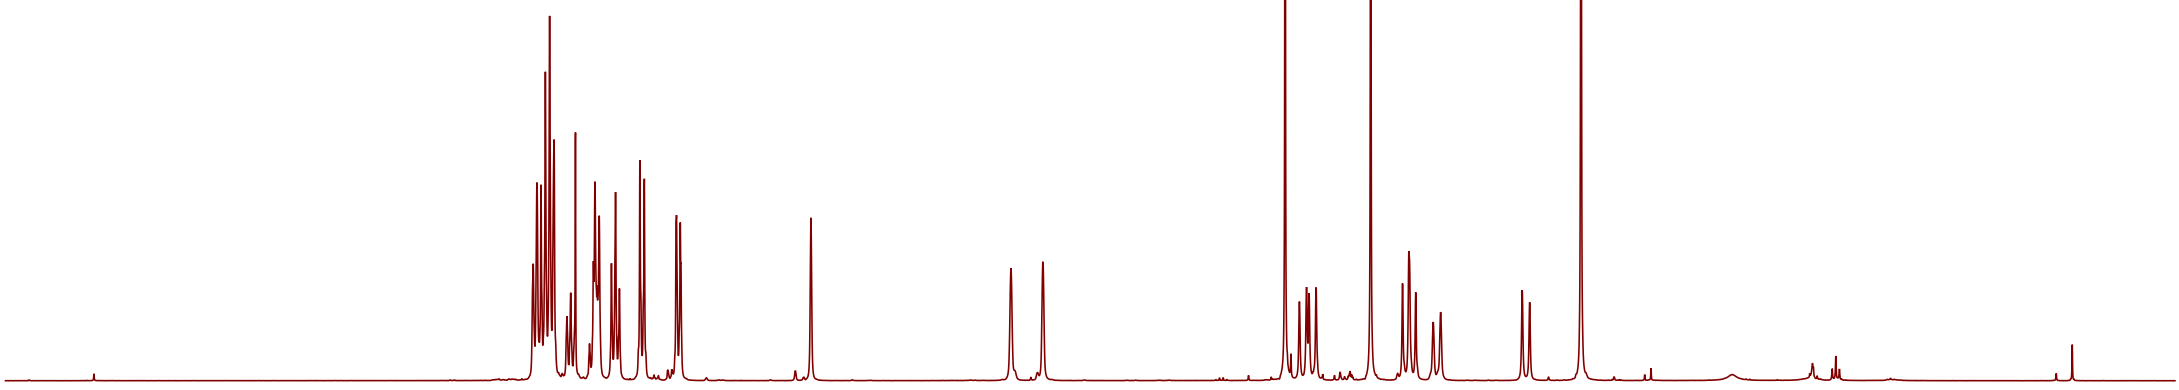

8.07  
1.05  
3.04  
2.04  
2.01  
2.01

1.00

1.00  
0.97

3.01  
2.02

3.00  
2.02  
1.02

1.01

3.02

10.0 9.5 9.0 8.5 8.0 7.5 7.0 6.5 6.0 5.5 5.0 4.5 4.0 3.5 3.0 2.5 2.0 1.5 1.0 0.5 0.0 -0

f1 (ppm)  
S131

158.67  
143.13  
140.66  
139.38  
137.00  
135.64  
131.36  
131.22  
129.83  
128.82  
128.72  
128.47  
128.22  
128.01  
126.91  
117.19  
113.91

89.35

58.20  
57.65  
56.73  
56.22  
55.35

21.58

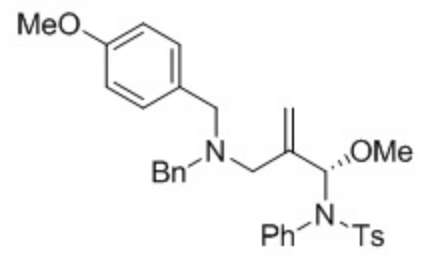

CDCl<sub>3</sub>, 75 MHz

3m'

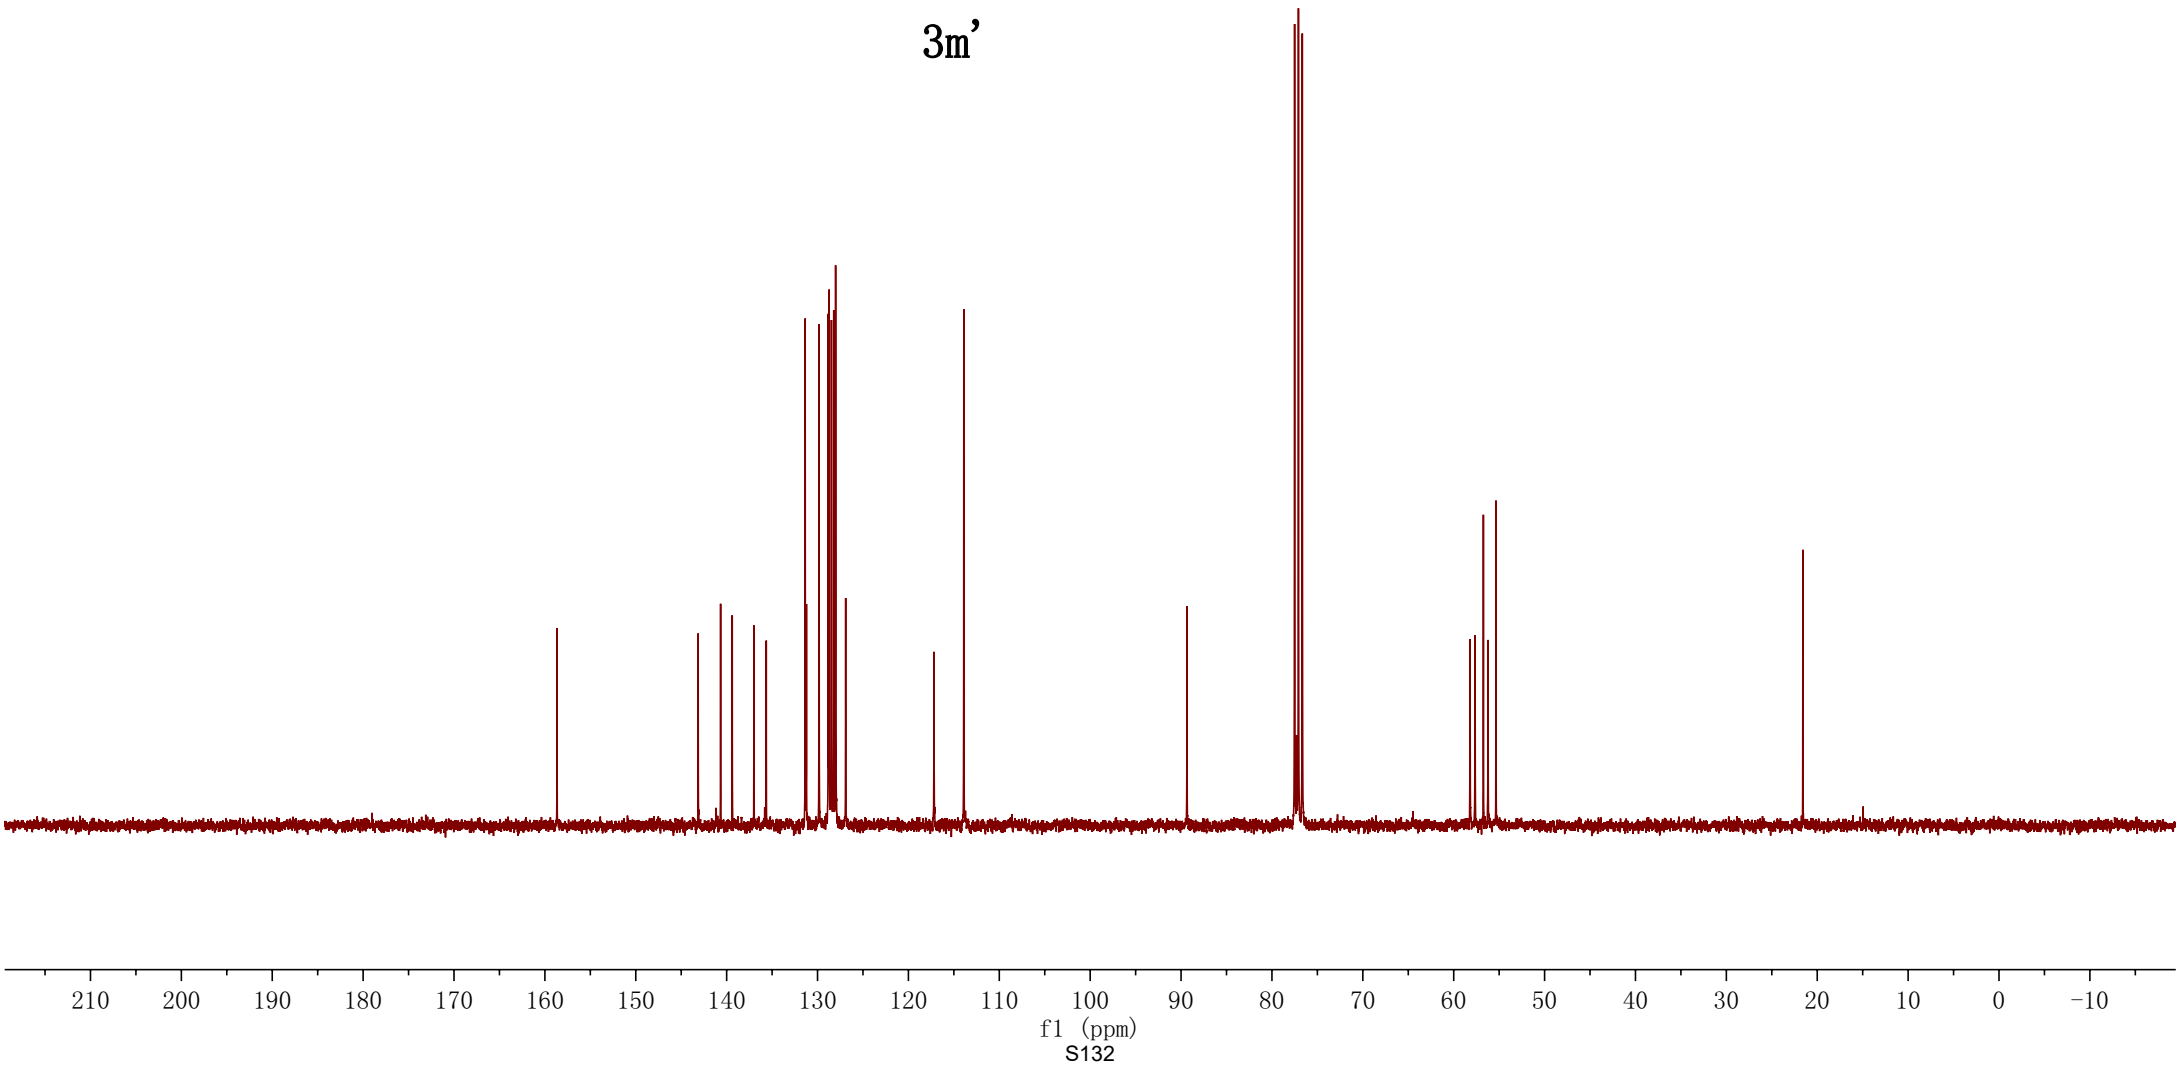

8.25  
8.23  
7.65  
7.63  
7.45  
7.43  
7.40  
7.38  
7.37  
7.26  
7.16  
7.14  
7.07  
6.97  
6.75

6.12

5.17  
5.04

3.81  
3.78  
3.78  
3.75  
3.39  
3.34  
3.30  
3.27  
3.13  
3.09

2.72  
2.69

2.39

1.60

0.00

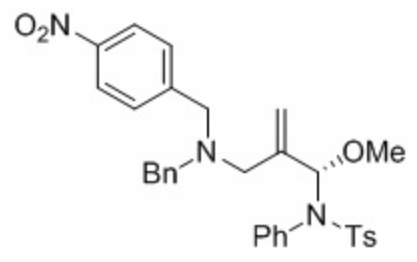

CDCl<sub>3</sub>, 400 MHz

3n'

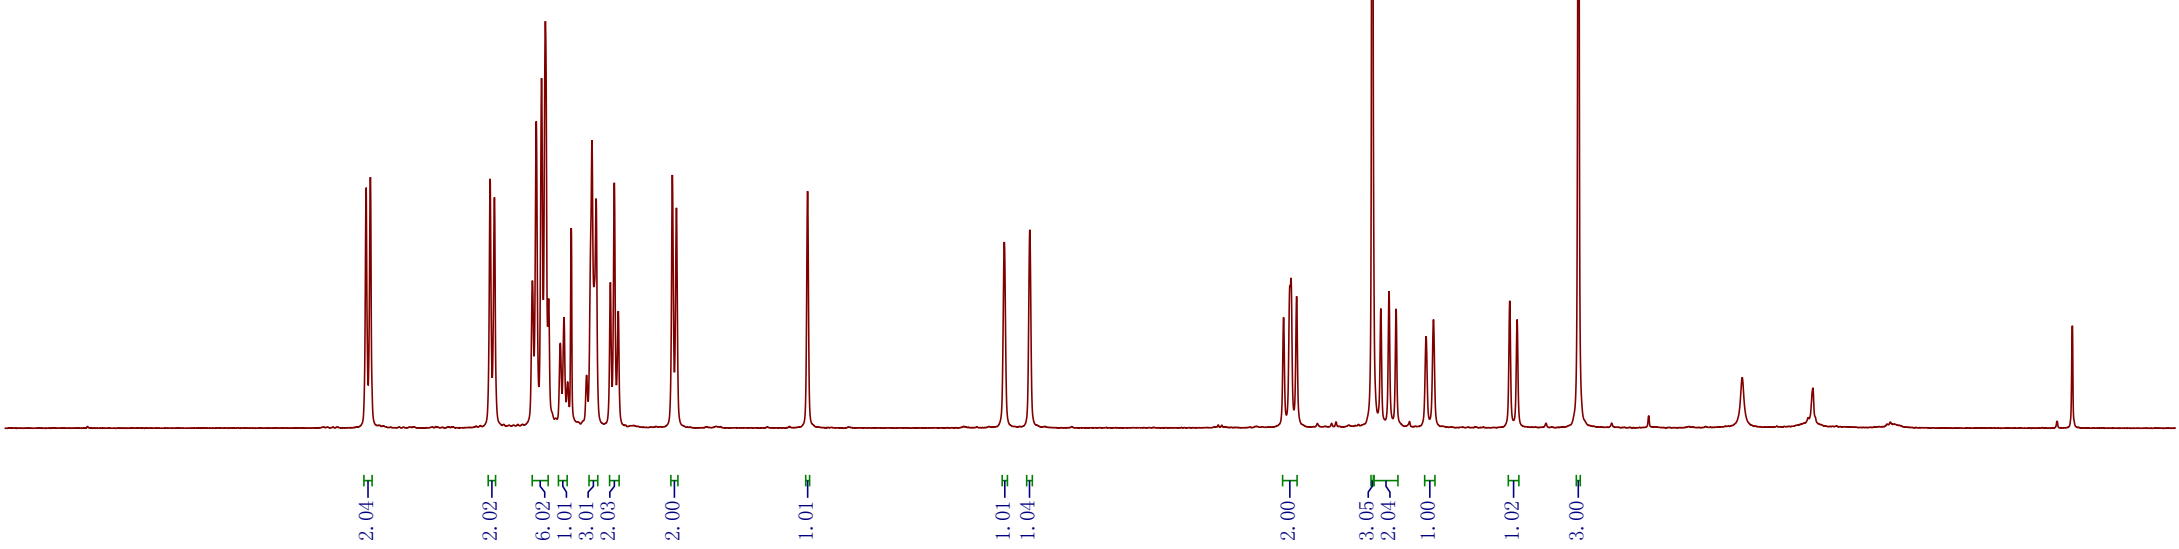

0.0 9.5 9.0 8.5 8.0 7.5 7.0 6.5 6.0 5.5 5.0 4.5 4.0 3.5 3.0 2.5 2.0 1.5 1.0 0.5 0.0 -0.0

f1 (ppm)

S133

147.35  
147.14  
143.32  
140.14  
138.47  
136.63  
135.53  
131.09  
129.13  
128.85  
128.69  
128.66  
128.17  
128.09  
127.31  
123.83  
117.74

89.24

58.61  
57.76  
56.85  
56.59

21.58

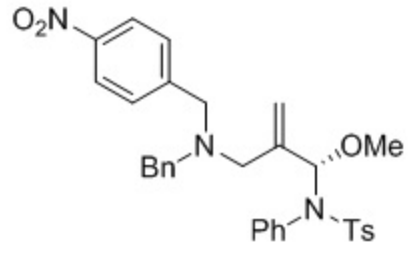

CDCl<sub>3</sub>, 75 MHz

3n'



f1 (ppm)  
S134



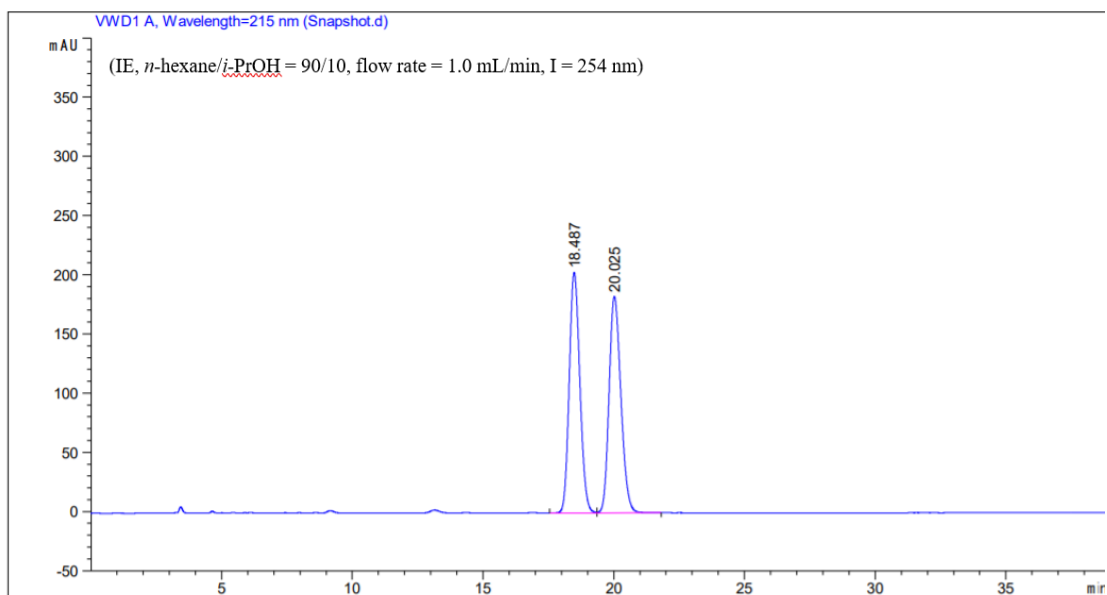

| 峰 # | 保留时间 [min] | 类型 | 峰宽 [min] | 峰面积 [mAU*s] | 峰高 [mAU]  | 峰面积 %   |
|-----|------------|----|----------|-------------|-----------|---------|
| 1   | 18.487     | BV | 0.4390   | 5734.35156  | 203.34953 | 49.9923 |
| 2   | 20.025     | VB | 0.4879   | 5736.12402  | 182.91193 | 50.0077 |

总量 : 1.14705e4 386.26146

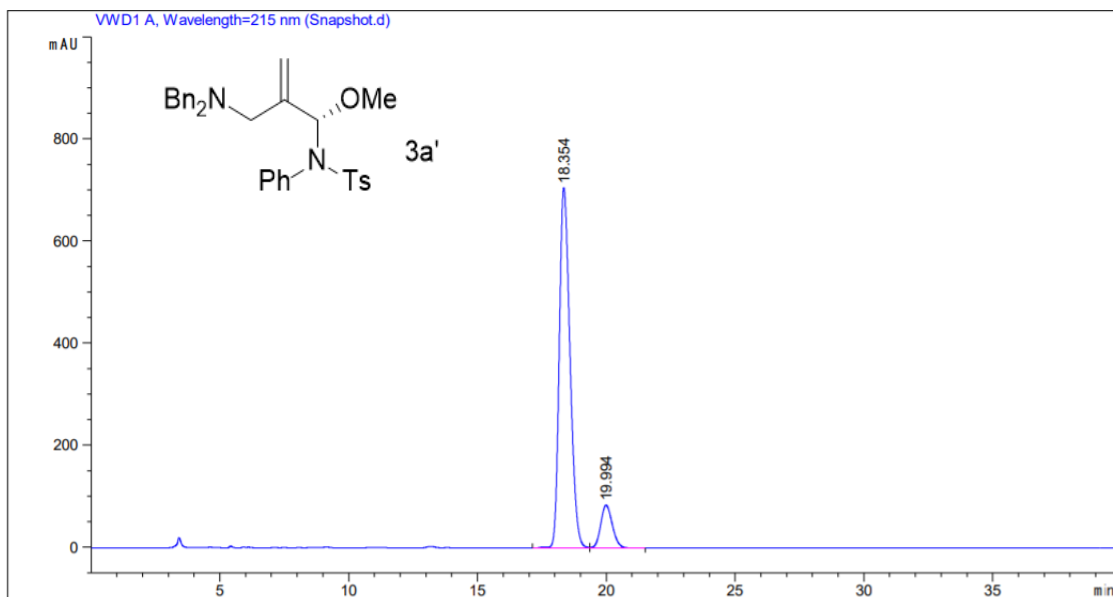

| 峰 # | 保留时间 [min] | 类型   | 峰宽 [min] | 峰面积 [mAU*s] | 峰高 [mAU]  | 峰面积 %   |
|-----|------------|------|----------|-------------|-----------|---------|
| 1   | 18.354     | VV R | 0.4462   | 2.03382e4   | 706.16089 | 88.5076 |
| 2   | 19.994     | VB   | 0.4861   | 2640.84644  | 84.14775  | 11.4924 |

总量 : 2.29790e4 790.30864

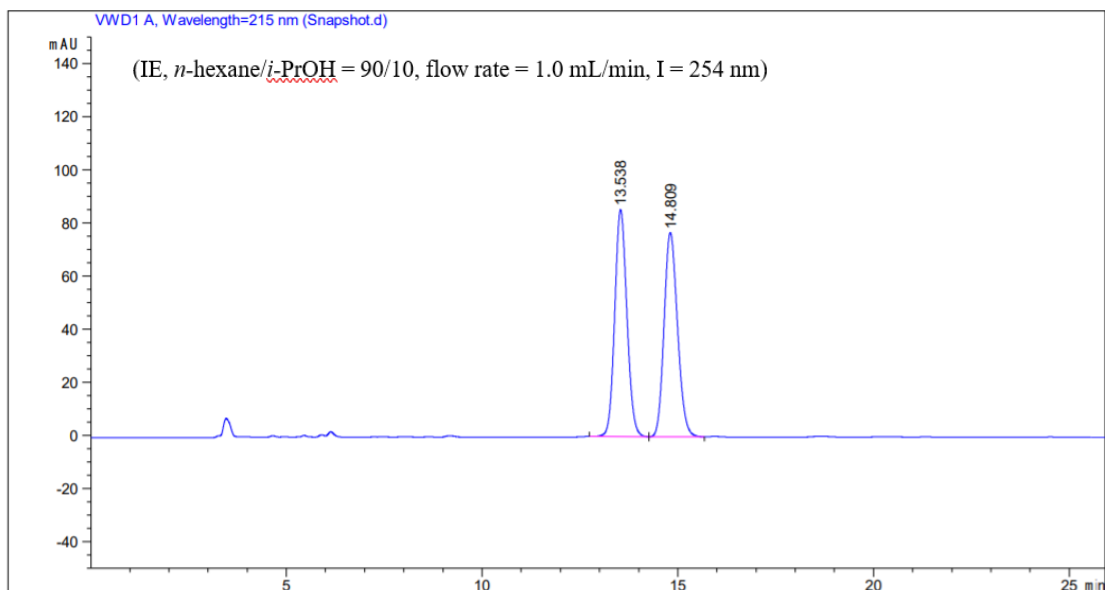

| 峰 # | 保留时间 [min] | 类型 | 峰宽 [min] | 峰面积 [mAU*s] | 峰高 [mAU] | 峰面积 %   |
|-----|------------|----|----------|-------------|----------|---------|
| 1   | 13.538     | BB | 0.3359   | 1850.92090  | 85.38480 | 50.2395 |
| 2   | 14.809     | BB | 0.3702   | 1833.27380  | 76.87555 | 49.7605 |

总量 : 3684.19470 162.26035

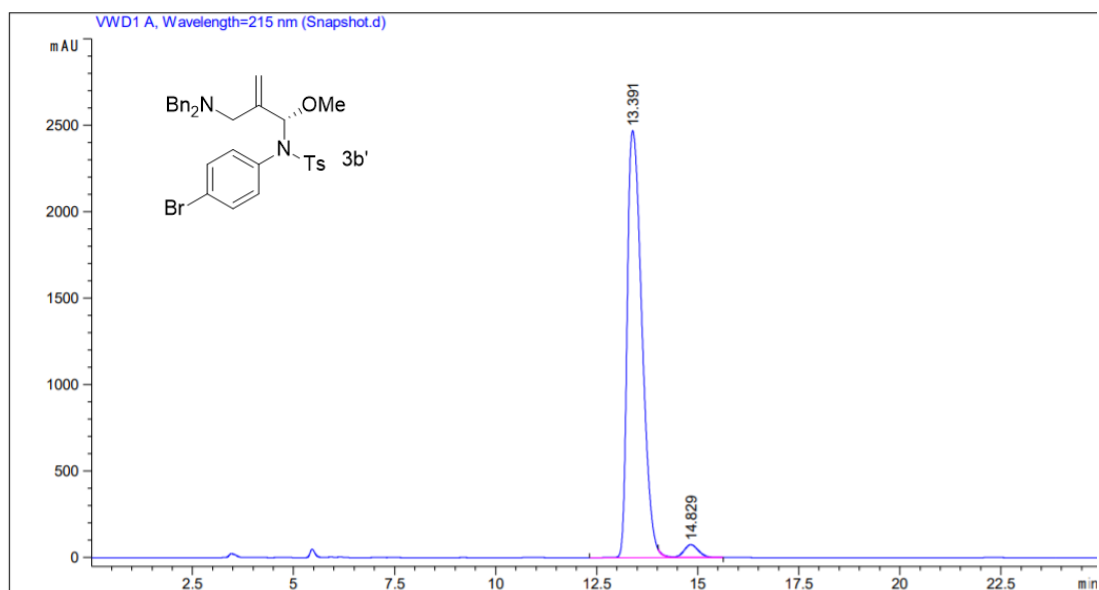

| 峰 # | 保留时间 [min] | 类型   | 峰宽 [min] | 峰面积 [mAU*s] | 峰高 [mAU]   | 峰面积 %   |
|-----|------------|------|----------|-------------|------------|---------|
| 1   | 13.391     | EV R | 0.3964   | 6.22506e4   | 2466.70728 | 97.0337 |
| 2   | 14.829     | VB E | 0.3910   | 1903.00684  | 74.74831   | 2.9663  |

总量 : 6.41536e4 2541.45558

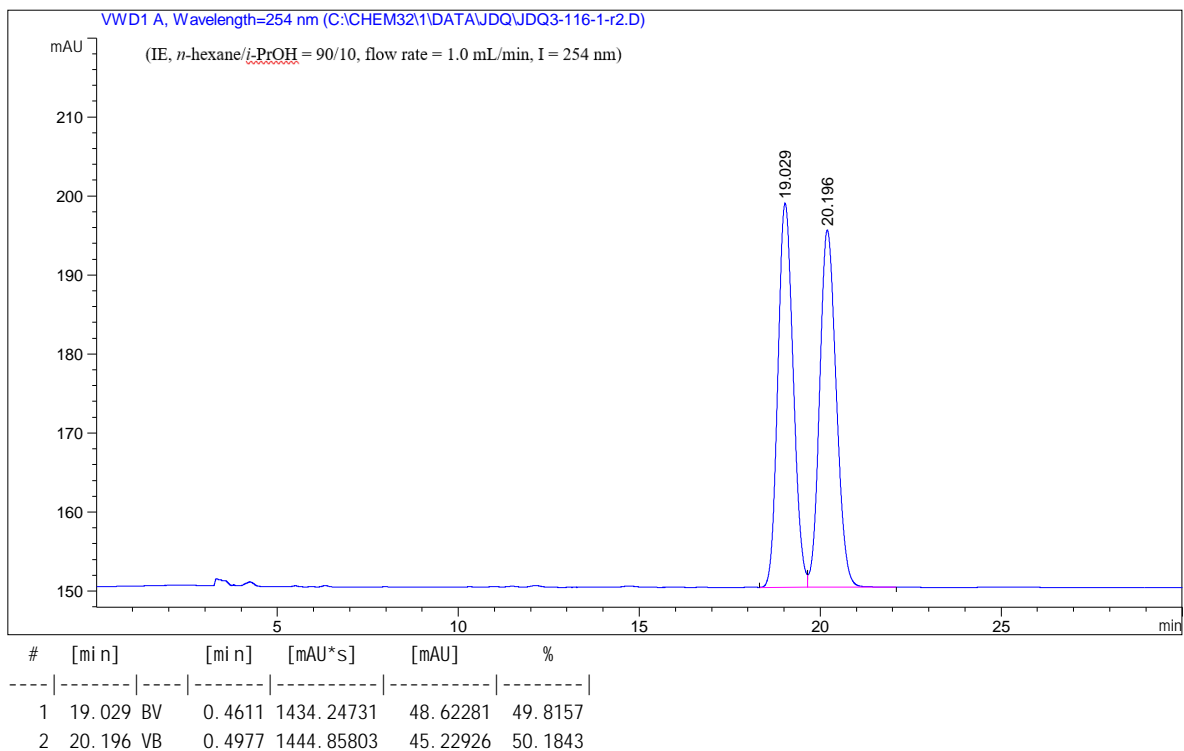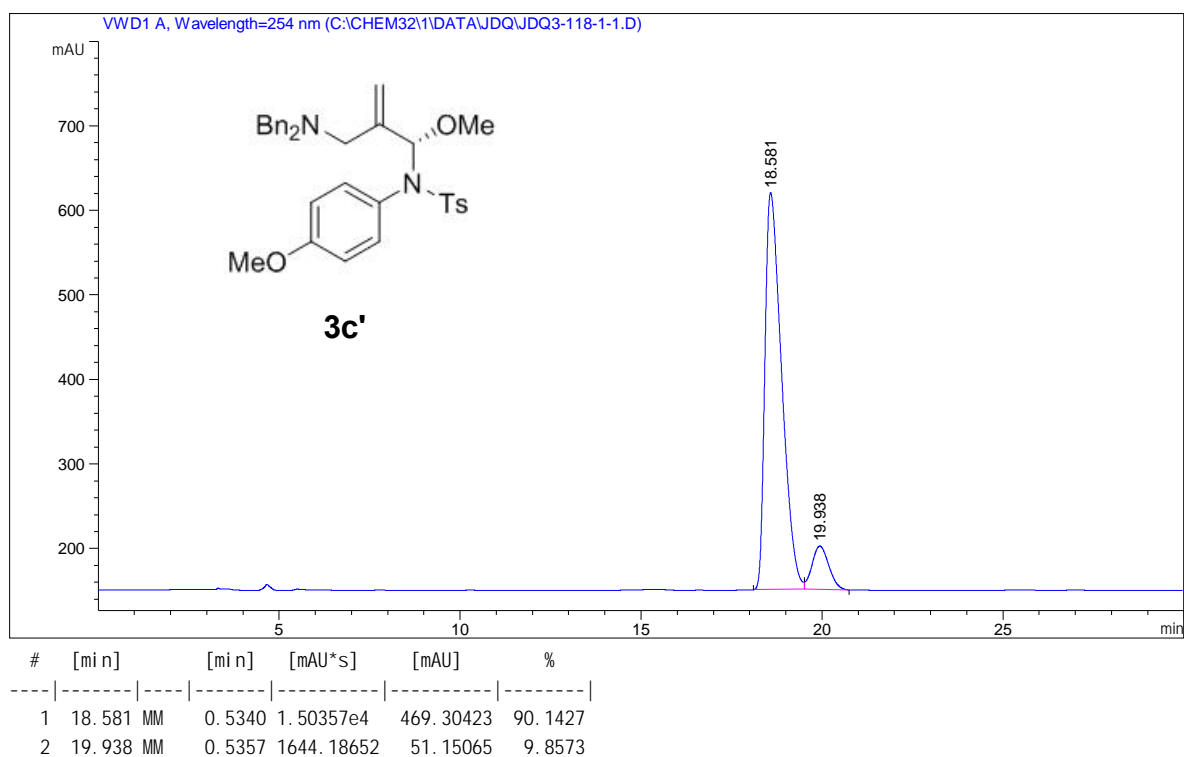

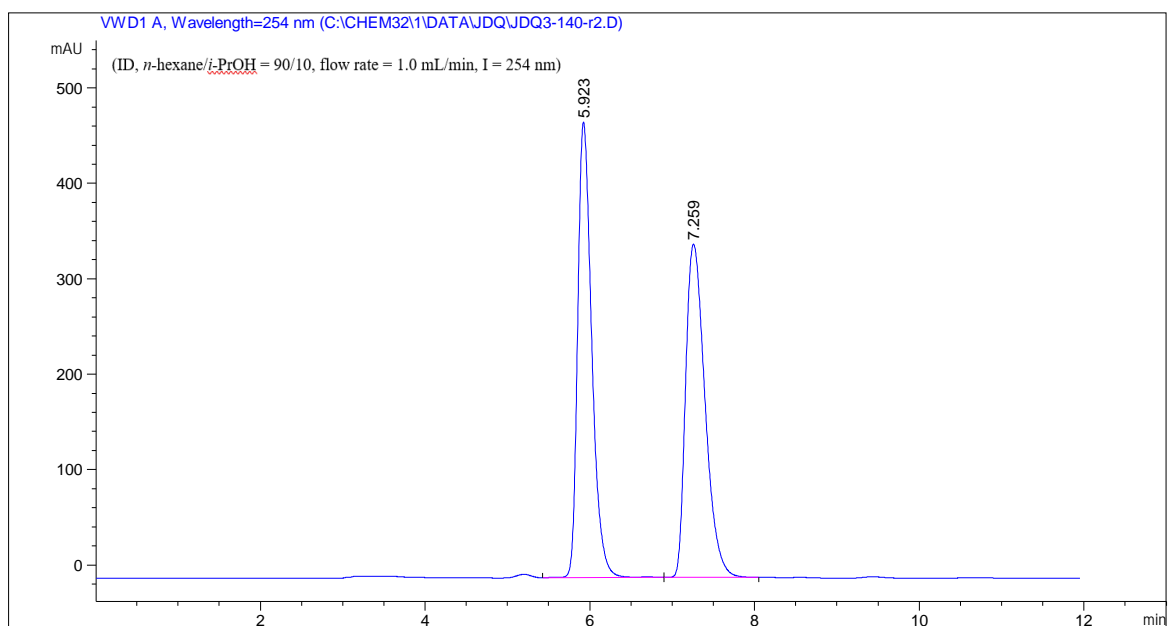

| # | [min] | [min] | [mAU*s]           | [mAU]     | %       |
|---|-------|-------|-------------------|-----------|---------|
| 1 | 5.923 | VV R  | 0.1824 5663.89063 | 477.58734 | 49.7988 |
| 2 | 7.259 | BB    | 0.2567 5709.65186 | 349.23334 | 50.2012 |

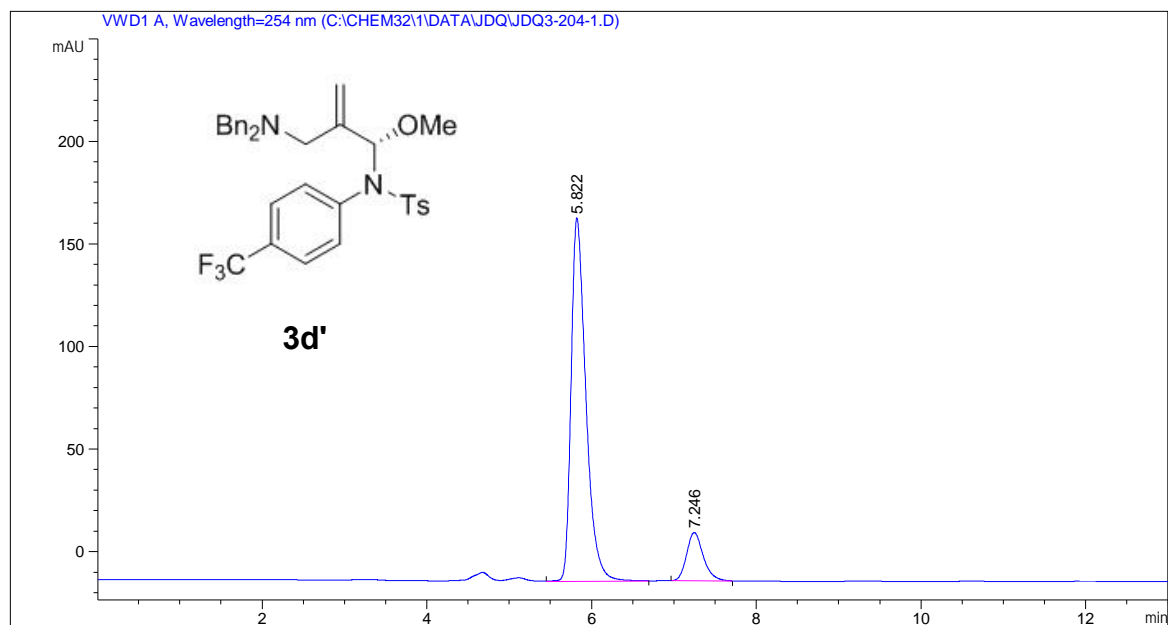

| # | [min] | [min] | [mAU*s]           | [mAU]     | %       |
|---|-------|-------|-------------------|-----------|---------|
| 1 | 5.822 | MM    | 0.2077 2207.93042 | 177.13953 | 87.0718 |
| 2 | 7.246 | MM    | 0.2332 327.82834  | 23.43088  | 12.9282 |

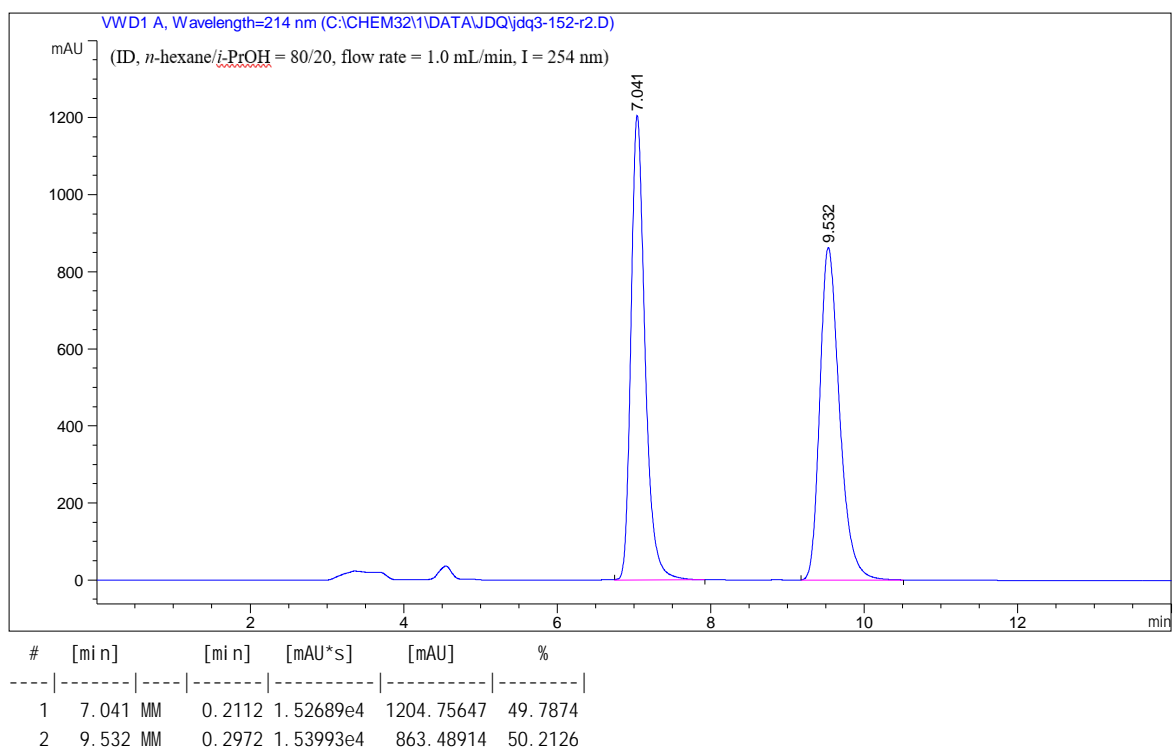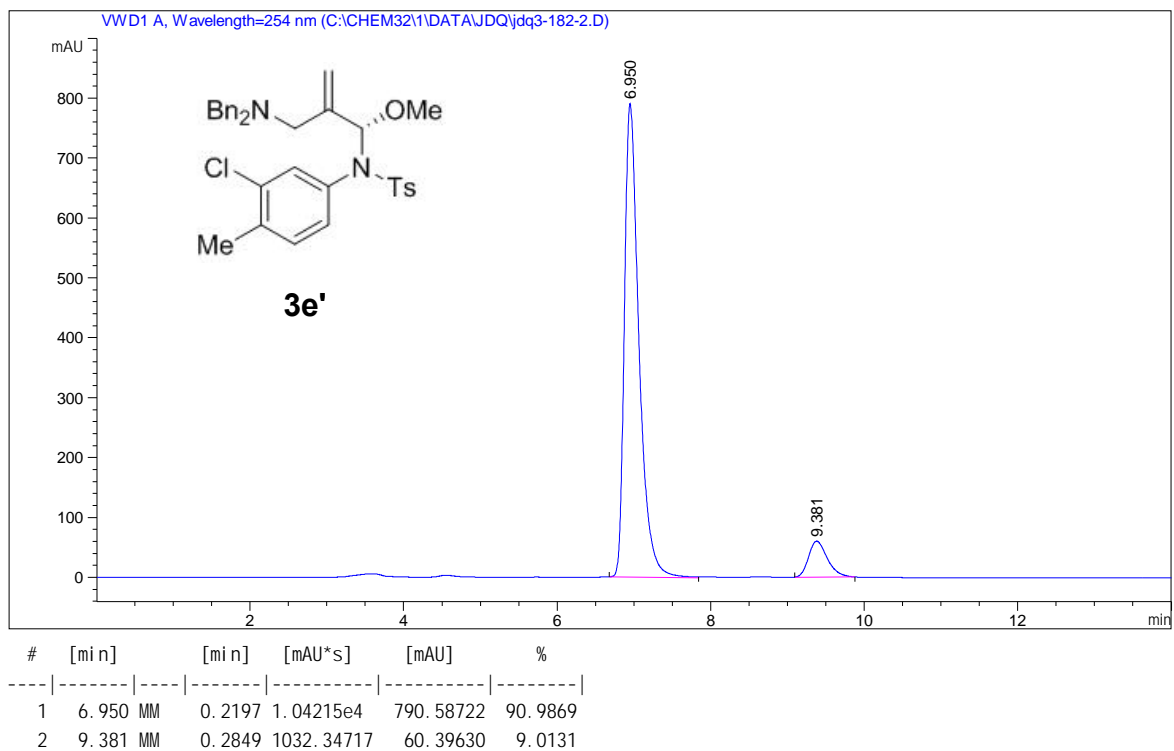

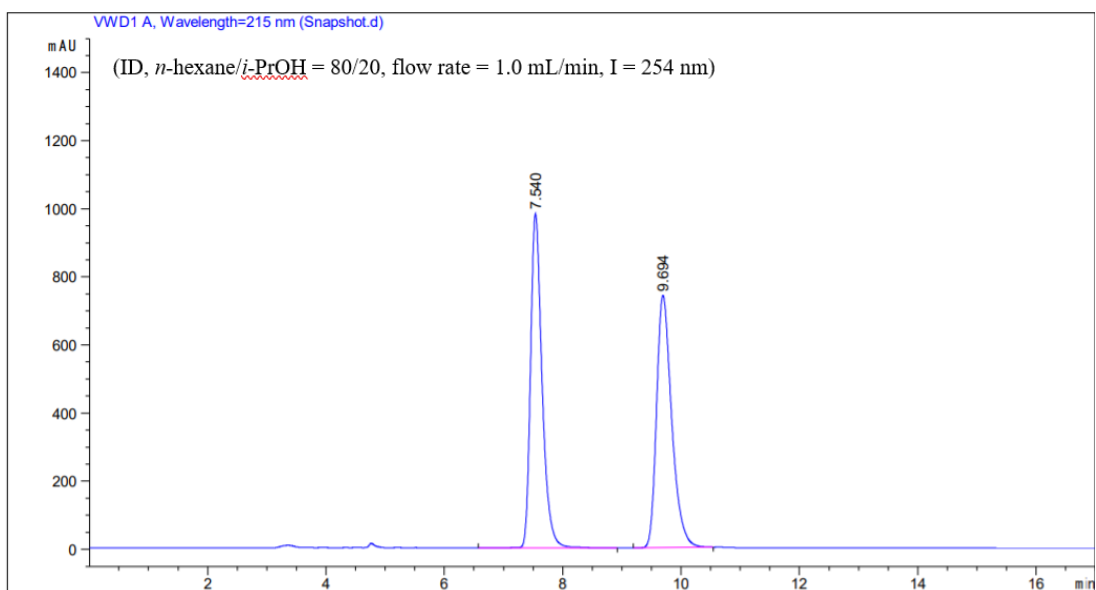

| 峰 # | 保留时间 [min] | 类型   | 峰宽 [min] | 峰面积 [mAU*s] | 峰高 [mAU]  | 峰面积 %   |
|-----|------------|------|----------|-------------|-----------|---------|
| 1   | 7.540      | VB R | 0.2045   | 1.32580e4   | 981.97534 | 50.1800 |
| 2   | 9.694      | BB   | 0.2702   | 1.31629e4   | 741.12482 | 49.8200 |

总量 : 2.64209e4 1723.10016

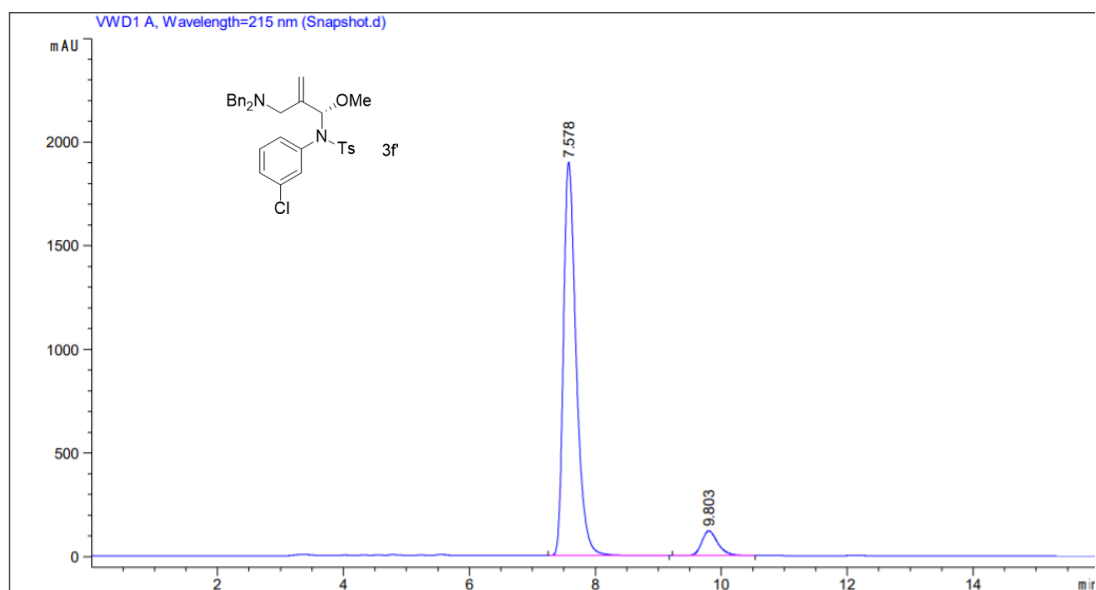

| 峰 # | 保留时间 [min] | 类型 | 峰宽 [min] | 峰面积 [mAU*s] | 峰高 [mAU]   | 峰面积 %   |
|-----|------------|----|----------|-------------|------------|---------|
| 1   | 7.578      | BB | 0.2132   | 2.65455e4   | 1898.12756 | 92.7227 |
| 2   | 9.803      | BB | 0.2675   | 2083.40381  | 118.85362  | 7.2773  |

总量 : 2.86289e4 2016.98119

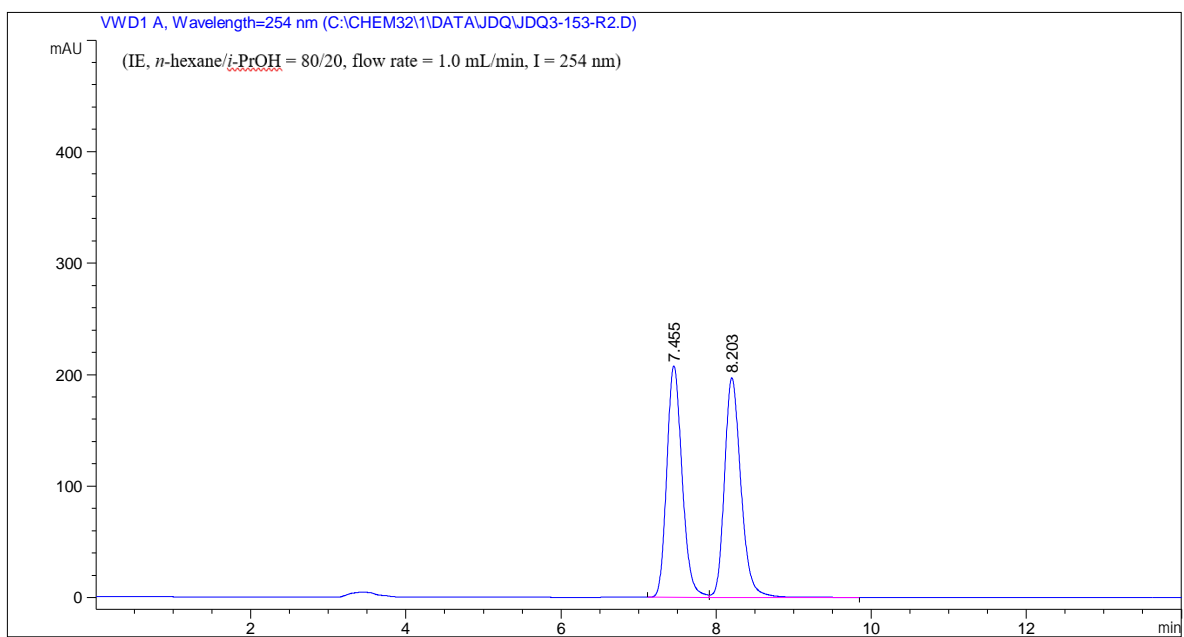

| # | [min]    | [min]  | [mAU*s]    | [mAU]     | %       |
|---|----------|--------|------------|-----------|---------|
| 1 | 7.455 BV | 0.2122 | 2850.96387 | 207.56659 | 49.5758 |
| 2 | 8.203 VB | 0.2269 | 2899.75049 | 196.75731 | 50.4242 |

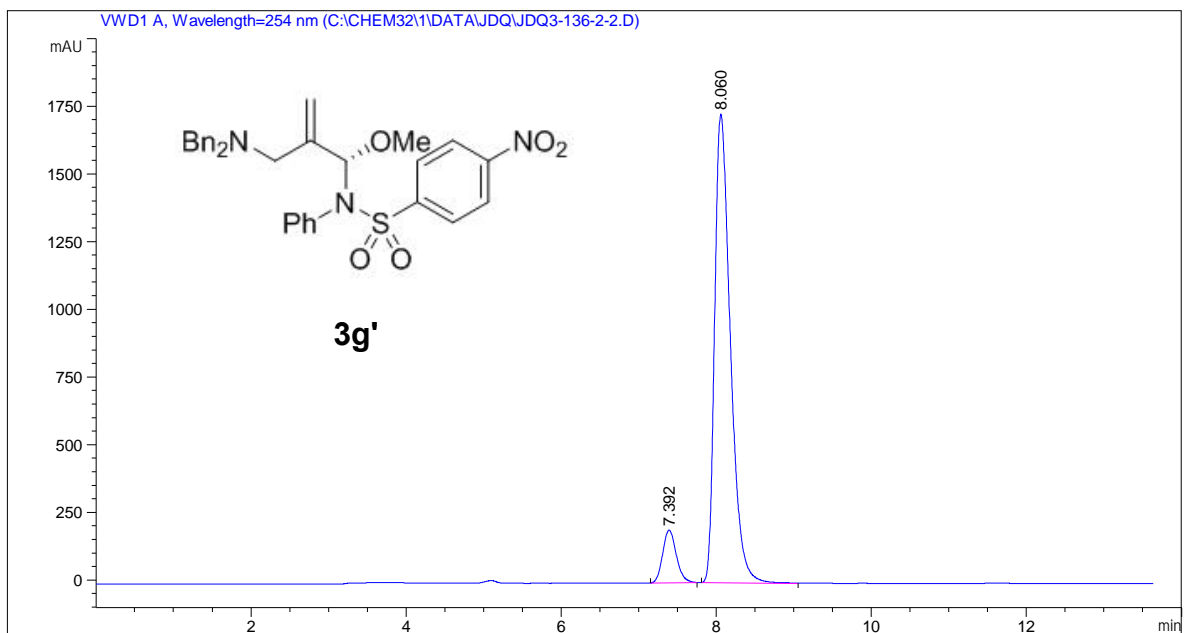

| # | [min]    | [min]  | [mAU*s]    | [mAU]      | %       |
|---|----------|--------|------------|------------|---------|
| 1 | 7.392 MM | 0.2038 | 2389.98560 | 195.46638  | 8.9439  |
| 2 | 8.060 MM | 0.2344 | 2.43321e4  | 1729.99744 | 91.0561 |

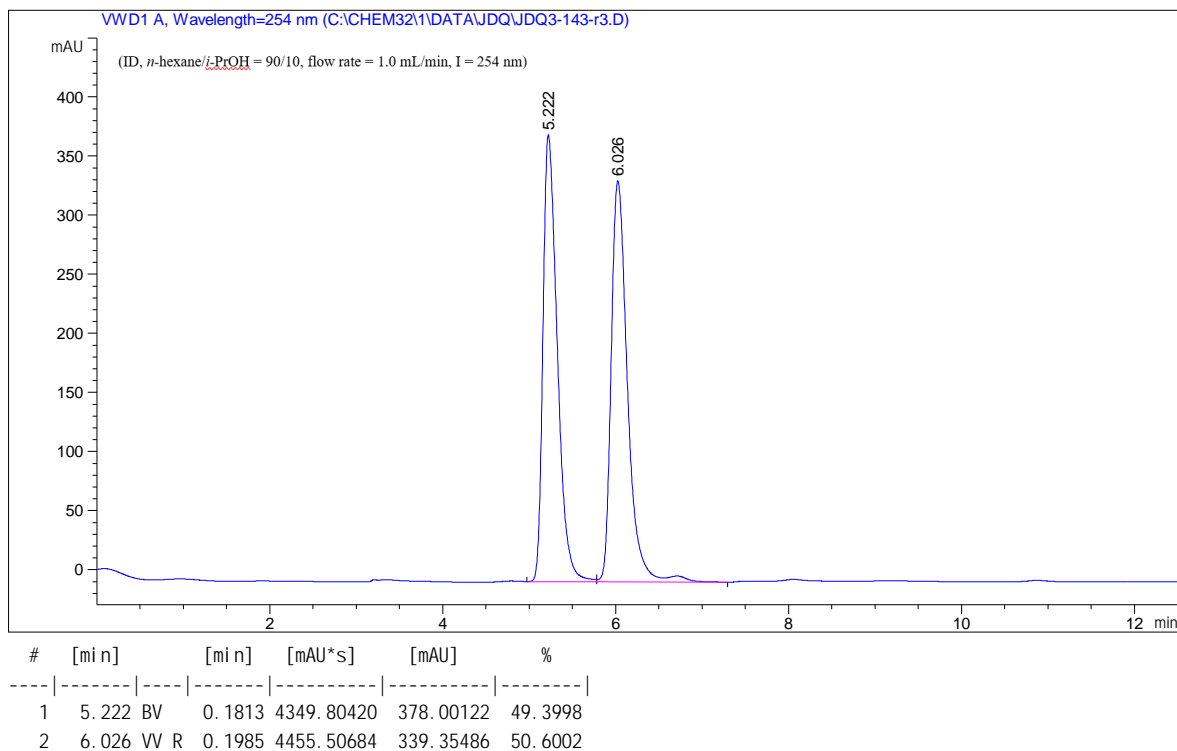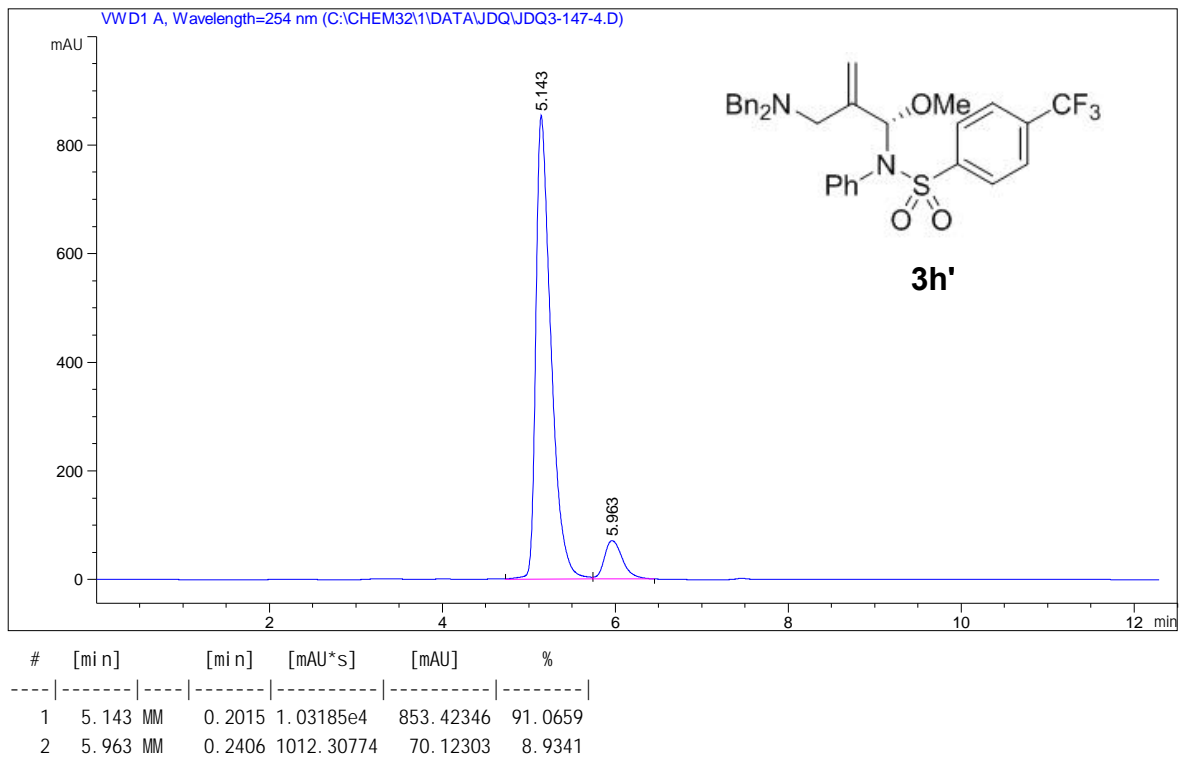



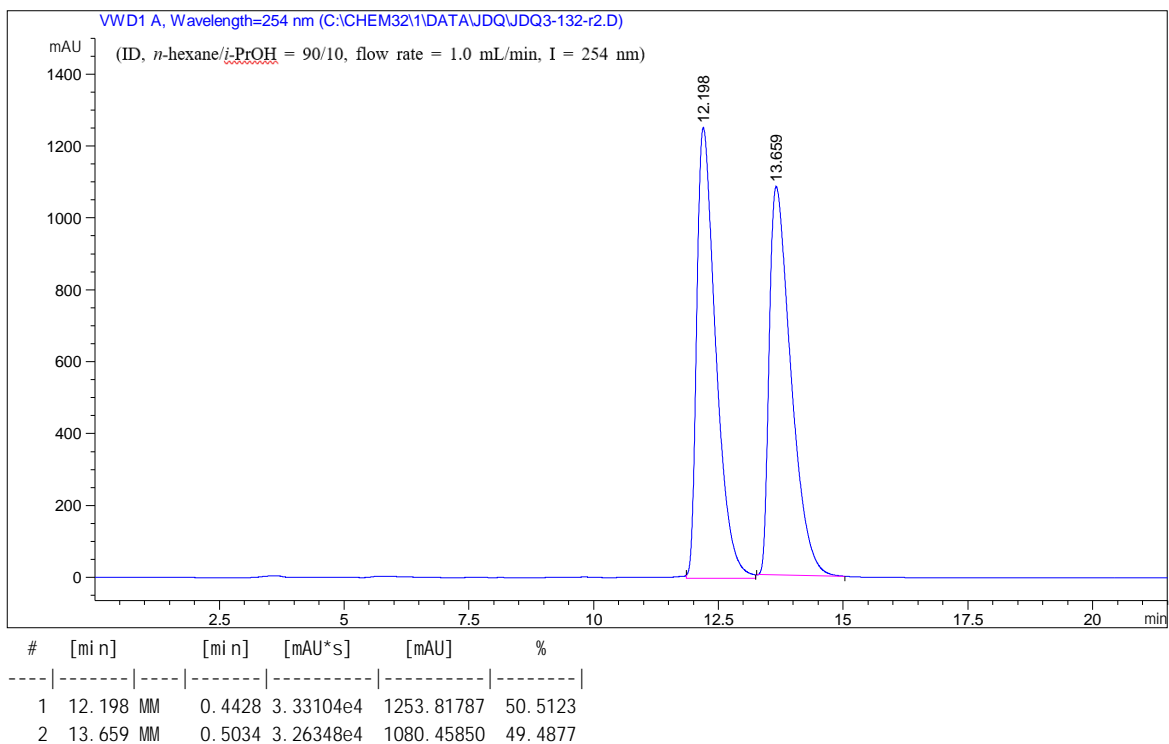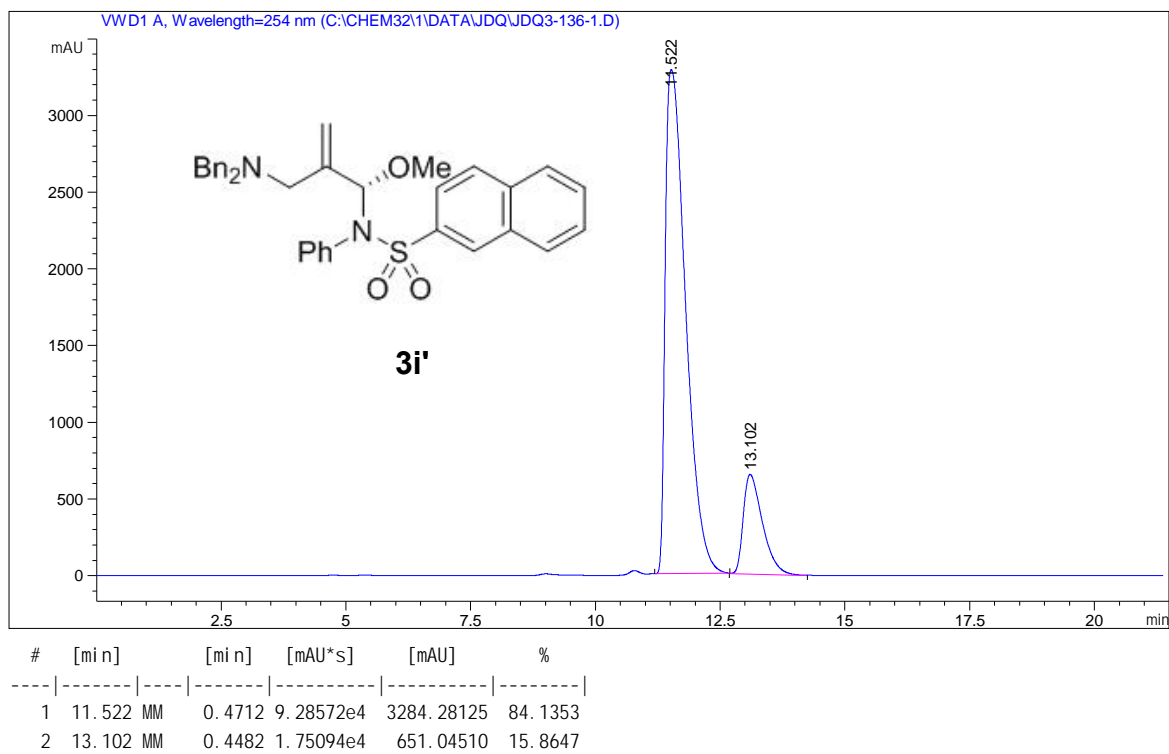

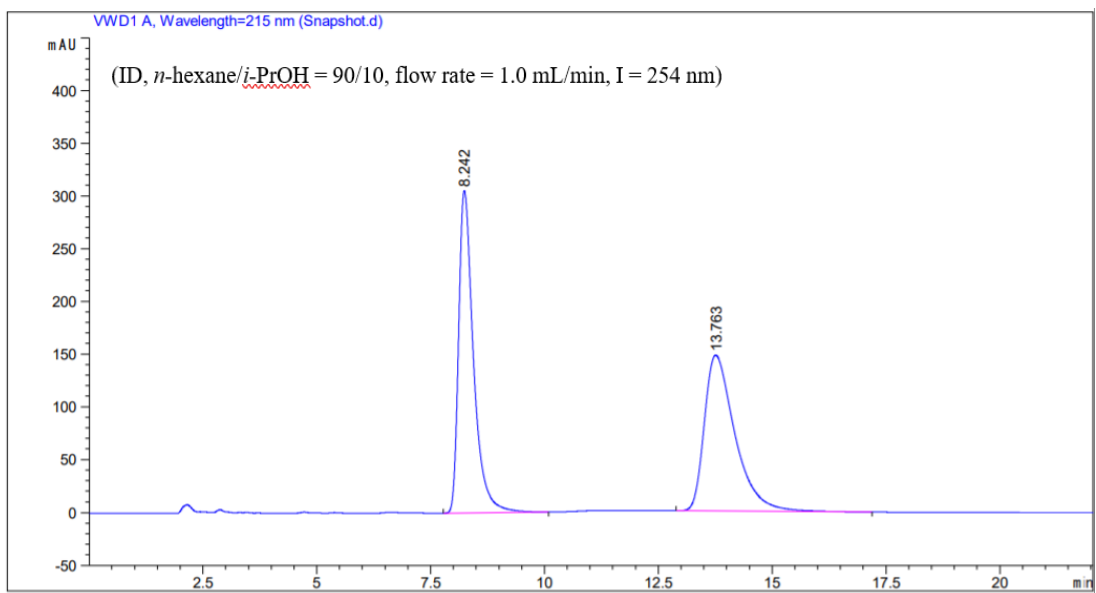

| 峰 # | 保留时间 [min] | 类型 | 峰宽 [min] | 峰面积 [mAU*s] | 峰高 [mAU]  | 峰面积 %   |
|-----|------------|----|----------|-------------|-----------|---------|
| 1   | 8.242      | BB | 0.3365   | 6870.56494  | 305.39972 | 49.9665 |
| 2   | 13.763     | BB | 0.7035   | 6879.78662  | 147.41821 | 50.0335 |

总量 : 1.37504e4 452.81793

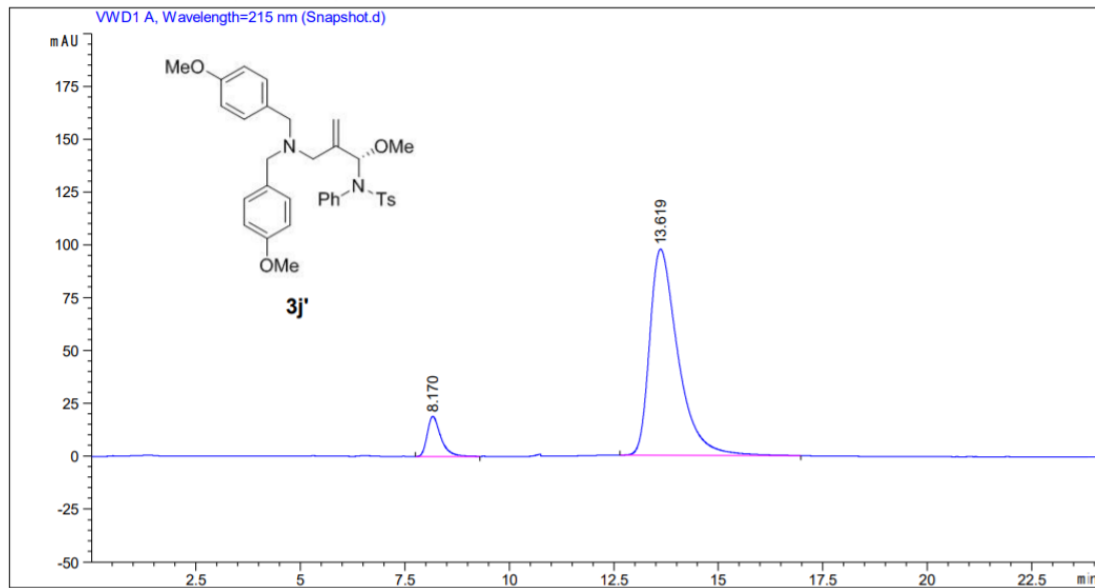

| 峰 # | 保留时间 [min] | 类型 | 峰宽 [min] | 峰面积 [mAU*s] | 峰高 [mAU] | 峰面积 %   |
|-----|------------|----|----------|-------------|----------|---------|
| 1   | 8.170      | BB | 0.3410   | 432.00006   | 19.01640 | 8.5874  |
| 2   | 13.619     | BB | 0.7088   | 4598.60010  | 97.58299 | 91.4126 |

总量 : 5030.60016 116.59939

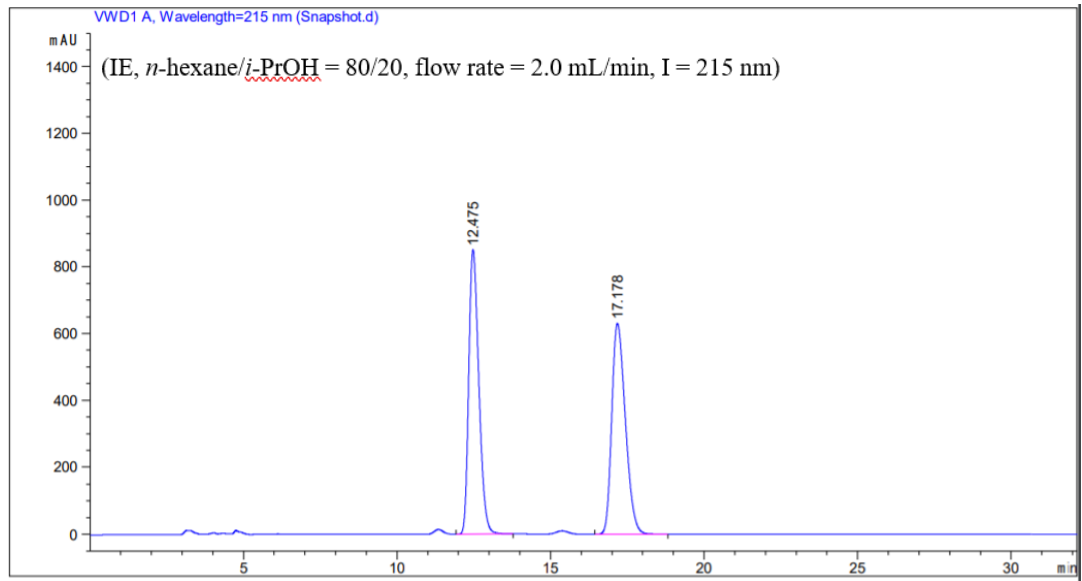

| 峰 # | 保留时间 [min] | 类型 | 峰宽 [min] | 峰面积 [mAU*s] | 峰高 [mAU]  | 峰面积 %   |
|-----|------------|----|----------|-------------|-----------|---------|
| 1   | 12.475     | BB | 0.3525   | 1.93650e4   | 851.03528 | 49.9052 |
| 2   | 17.178     | BB | 0.4785   | 1.94386e4   | 630.80719 | 50.0948 |

总量 : 3.88035e4 1481.84247

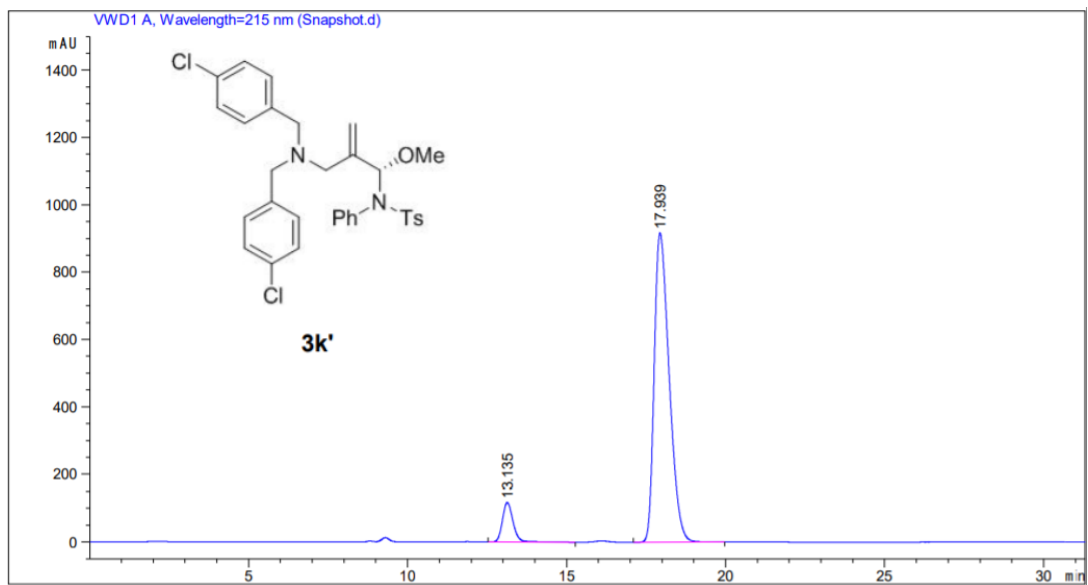

| 峰 # | 保留时间 [min] | 类型 | 峰宽 [min] | 峰面积 [mAU*s] | 峰高 [mAU]  | 峰面积 %   |
|-----|------------|----|----------|-------------|-----------|---------|
| 1   | 13.135     | BB | 0.3581   | 2728.44824  | 117.41451 | 8.3682  |
| 2   | 17.939     | BB | 0.5032   | 2.98766e4   | 916.78821 | 91.6318 |

总量 : 3.26051e4 1034.20271

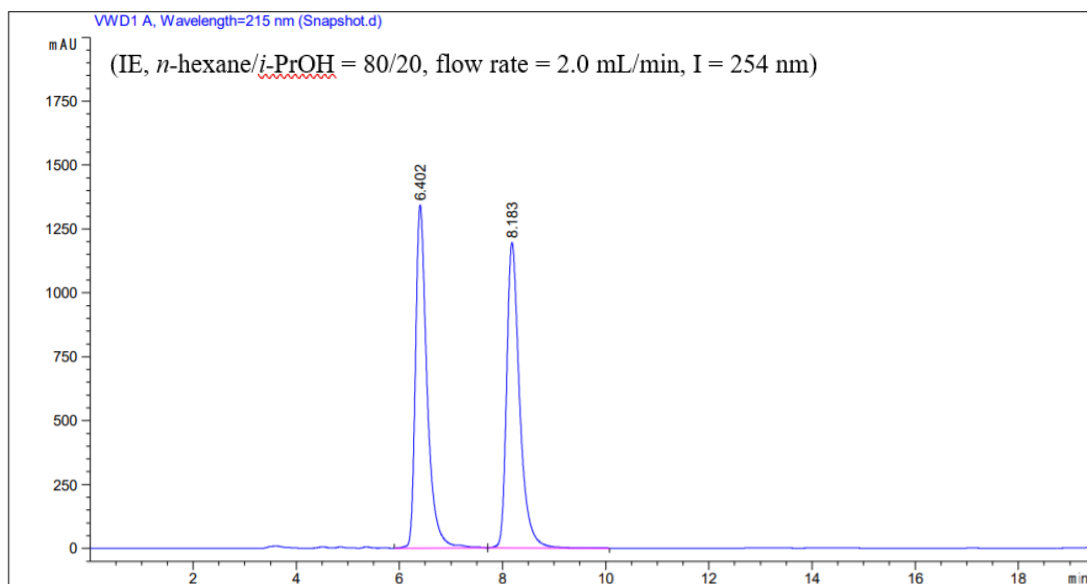

| 峰 # | 保留时间 [min] | 类型 | 峰宽 [min] | 峰面积 [mAU*s] | 峰高 [mAU]   | 峰面积 %   |
|-----|------------|----|----------|-------------|------------|---------|
| 1   | 6.402      | BB | 0.2327   | 2.09074e4   | 1342.25476 | 50.1229 |
| 2   | 8.183      | BB | 0.2632   | 2.08048e4   | 1194.75684 | 49.8771 |

总量 : 4.17122e4 2537.01160

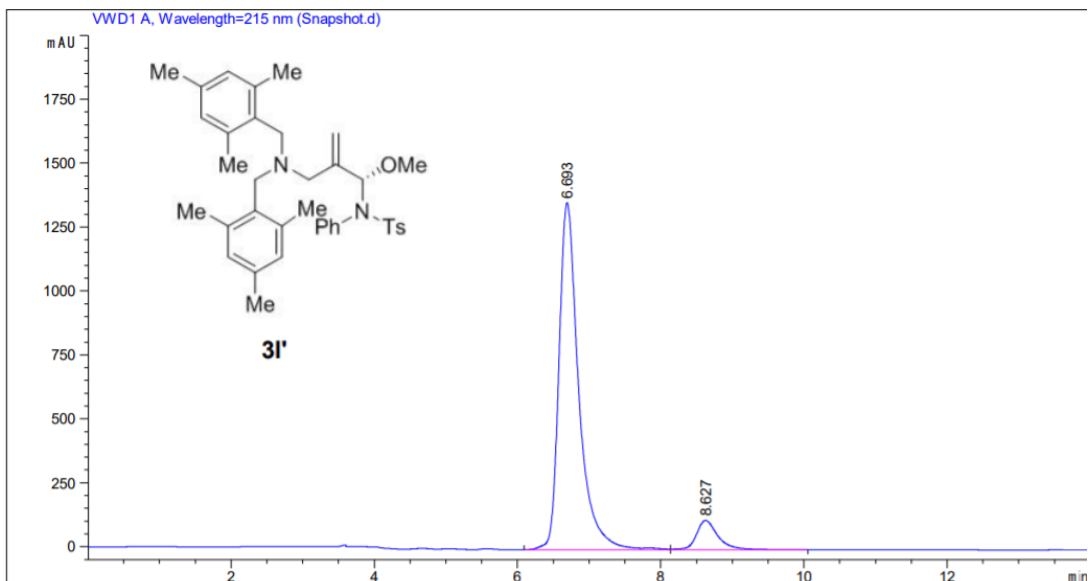

| 峰 # | 保留时间 [min] | 类型   | 峰宽 [min] | 峰面积 [mAU*s] | 峰高 [mAU]   | 峰面积 %   |
|-----|------------|------|----------|-------------|------------|---------|
| 1   | 6.693      | BV R | 0.2849   | 2.60084e4   | 1357.76782 | 91.4616 |
| 2   | 8.627      | VB   | 0.3148   | 2428.00879  | 114.78346  | 8.5384  |

总量 : 2.84364e4 1472.55128

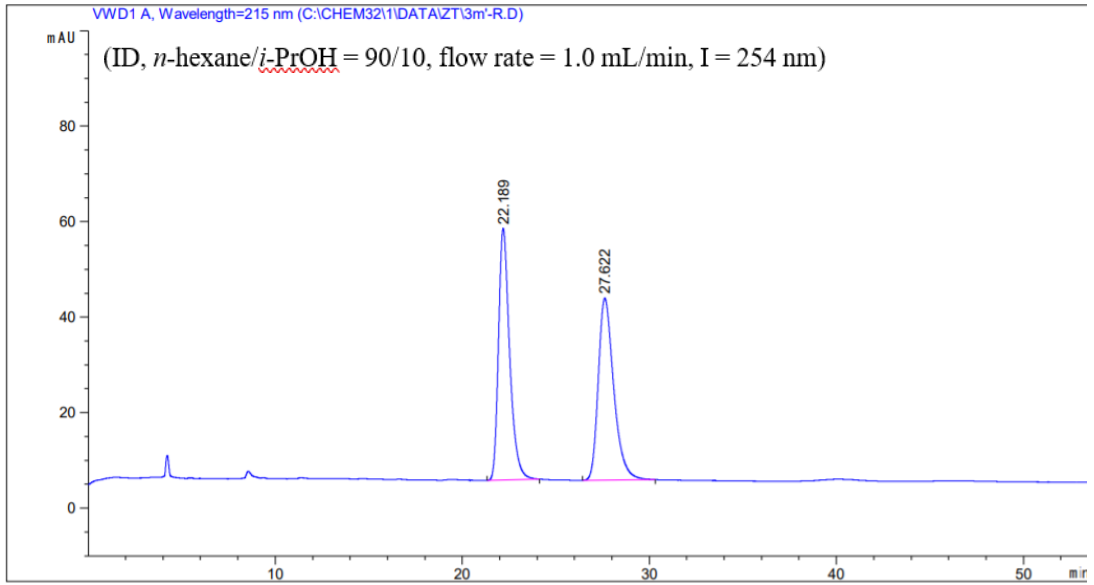

| 峰 # | 保留时间 [min] | 类型 | 峰宽 [min] | 峰面积 [mAU*s] | 峰高 [mAU] | 峰面积 %   |
|-----|------------|----|----------|-------------|----------|---------|
| 1   | 22.189     | BB | 0.6276   | 2181.51709  | 52.73207 | 49.9320 |
| 2   | 27.622     | BB | 0.8678   | 2187.45630  | 38.10400 | 50.0680 |

总量 : 4368.97339 90.83607

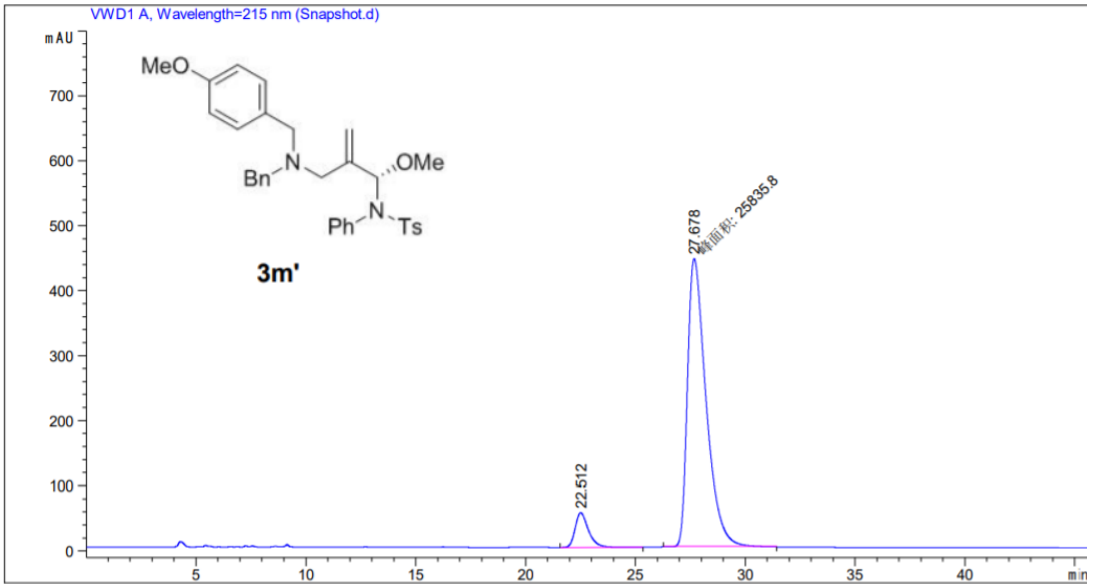

| 峰 # | 保留时间 [min] | 类型 | 峰宽 [min] | 峰面积 [mAU*s] | 峰高 [mAU]  | 峰面积 %   |
|-----|------------|----|----------|-------------|-----------|---------|
| 1   | 22.512     | BB | 0.6419   | 2264.04858  | 53.37036  | 8.0572  |
| 2   | 27.678     | MM | 0.9738   | 2.58358e4   | 442.19498 | 91.9428 |

总量 : 2.80998e4 495.56533

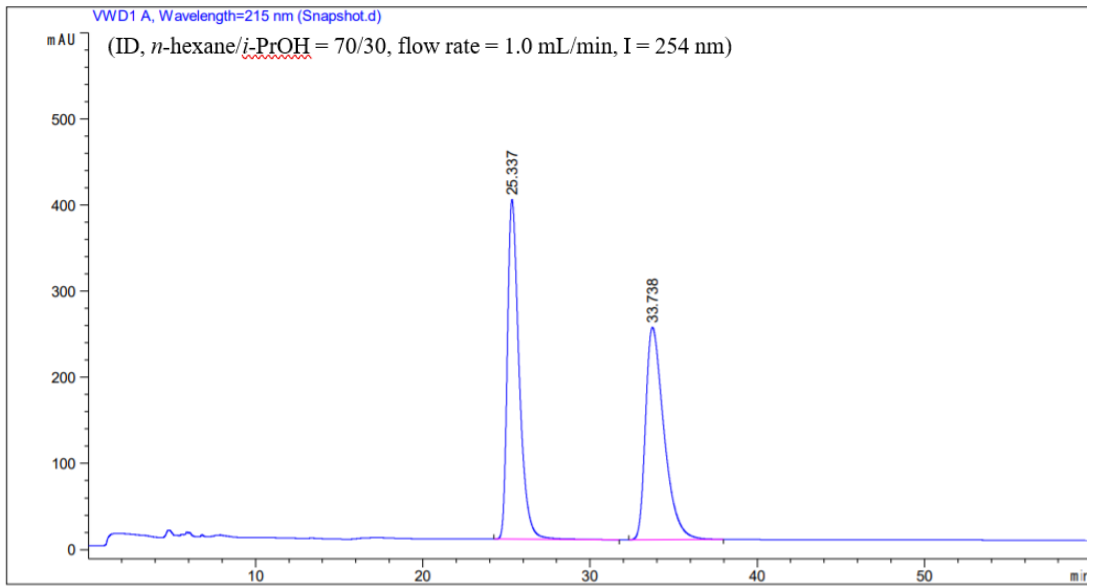

| 峰 # | 保留时间 [min] | 类型 | 峰宽 [min] | 峰面积 [mAU*s] | 峰高 [mAU]  | 峰面积 %   |
|-----|------------|----|----------|-------------|-----------|---------|
| 1   | 25.337     | BB | 0.7414   | 1.92477e4   | 393.65408 | 50.4789 |
| 2   | 33.738     | BB | 1.1660   | 1.88825e4   | 246.14005 | 49.5211 |

总量 : 3.81301e4 639.79413

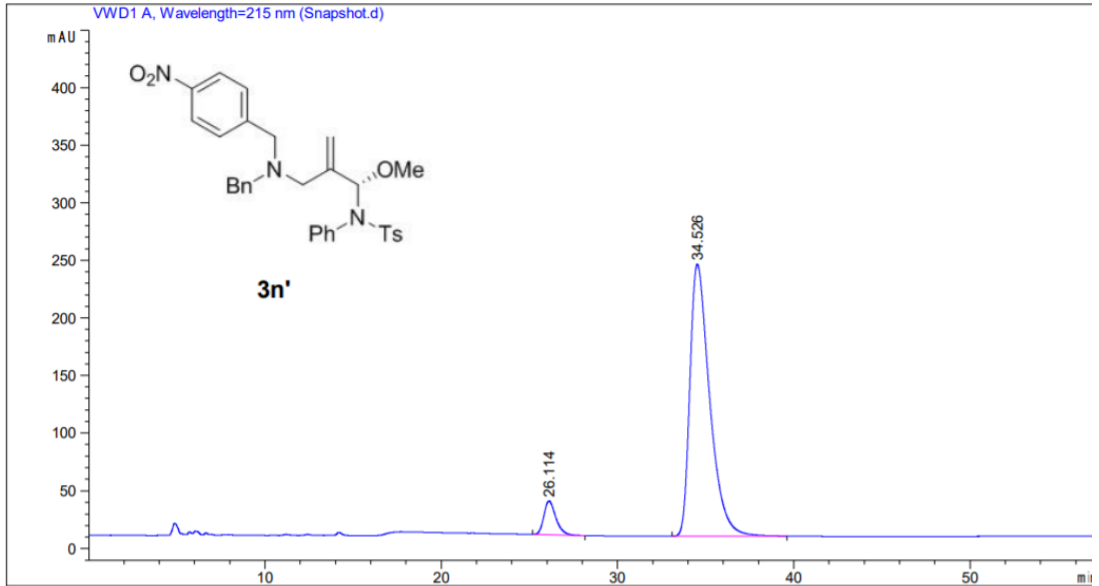

| 峰 # | 保留时间 [min] | 类型 | 峰宽 [min] | 峰面积 [mAU*s] | 峰高 [mAU]  | 峰面积 %   |
|-----|------------|----|----------|-------------|-----------|---------|
| 1   | 26.114     | BB | 0.7193   | 1395.99365  | 29.43606  | 7.0659  |
| 2   | 34.526     | BB | 1.1714   | 1.83607e4   | 235.80728 | 92.9341 |

总量 : 1.97567e4 265.24334

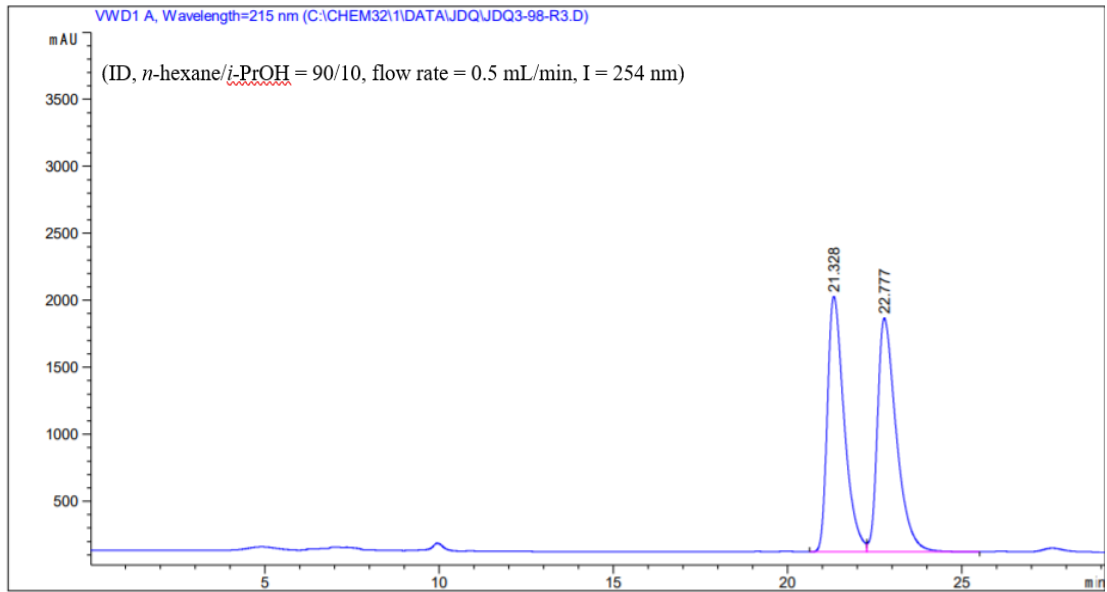

| 峰 # | 保留时间 [min] | 类型 | 峰宽 [min] | 峰面积 [mAU*s] | 峰高 [mAU]   | 峰面积 %   |
|-----|------------|----|----------|-------------|------------|---------|
| 1   | 21.328     | BV | 0.5080   | 6.39255e4   | 1907.42773 | 49.3219 |
| 2   | 22.777     | VB | 0.5685   | 6.56832e4   | 1743.77600 | 50.6781 |

总量 : 1.29609e5 3651.20374

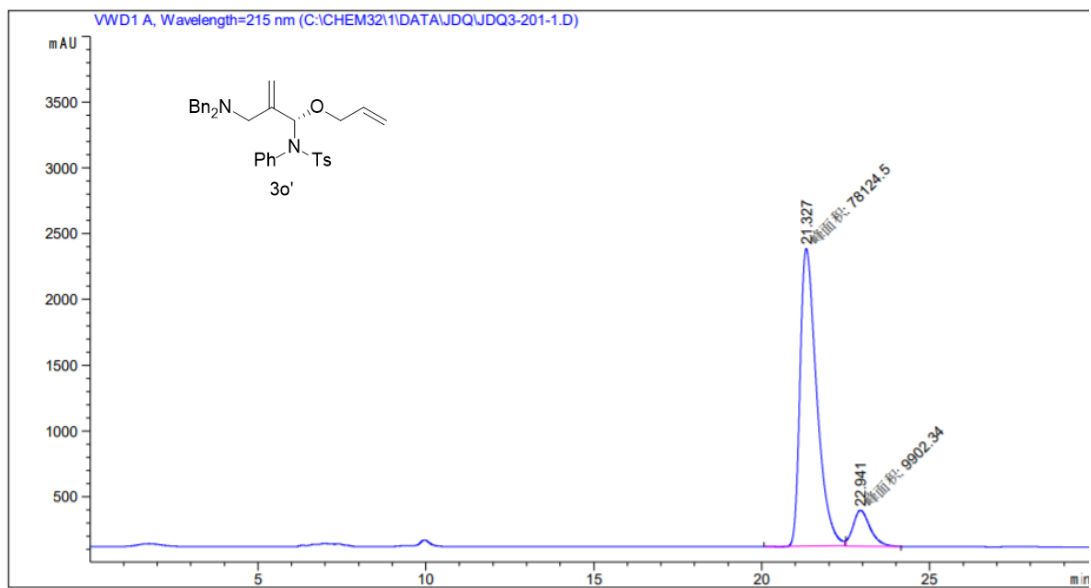

| 峰 # | 保留时间 [min] | 类型 | 峰宽 [min] | 峰面积 [mAU*s] | 峰高 [mAU]   | 峰面积 %   |
|-----|------------|----|----------|-------------|------------|---------|
| 1   | 21.327     | MM | 0.5757   | 7.81245e4   | 2261.55444 | 88.7508 |
| 2   | 22.941     | MM | 0.6011   | 9902.34473  | 274.57123  | 11.2492 |

总量 : 8.80269e4 2536.12567

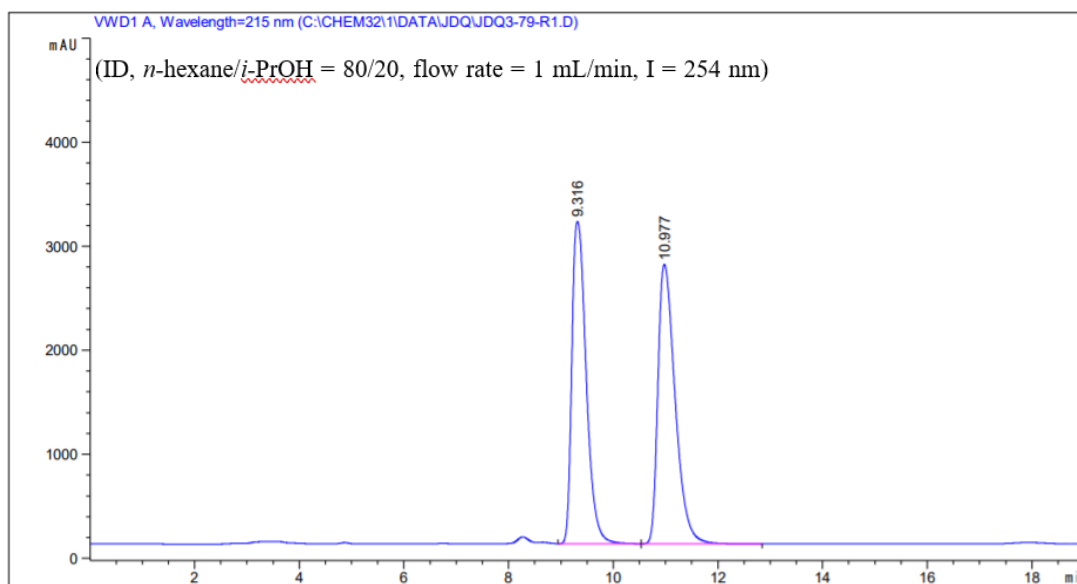

| 峰 # | 保留时间 [min] | 类型 | 峰宽 [min] | 峰面积 [mAU*s] | 峰高 [mAU]   | 峰面积 %   |
|-----|------------|----|----------|-------------|------------|---------|
| 1   | 9.316      | BB | 0.2949   | 5.88934e4   | 3097.05908 | 49.0157 |
| 2   | 10.977     | BB | 0.3512   | 6.12588e4   | 2685.02271 | 50.9843 |

总量 : 1.20152e5 5782.08179

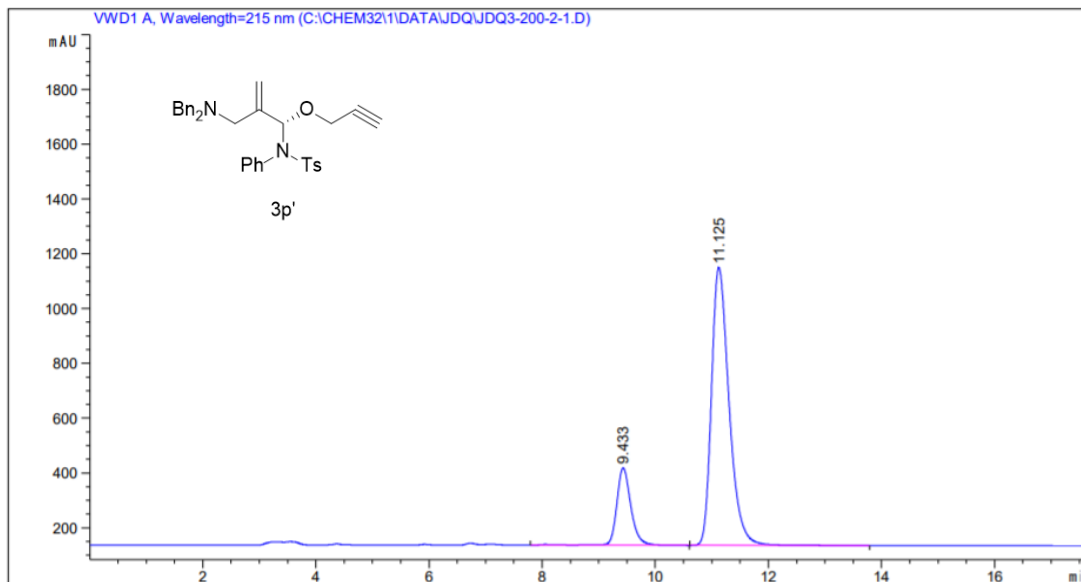

| 峰 # | 保留时间 [min] | 类型   | 峰宽 [min] | 峰面积 [mAU*s] | 峰高 [mAU]   | 峰面积 %   |
|-----|------------|------|----------|-------------|------------|---------|
| 1   | 9.433      | VB R | 0.2632   | 4963.26855  | 282.69083  | 18.5066 |
| 2   | 11.125     | BB   | 0.3295   | 2.18557e4   | 1013.81854 | 81.4934 |

总量 : 2.68189e4 1296.50937
